# Supplementary material for: mtR_find: A Parallel Processing Tool to Identify and Annotate RNAs Derived from the Mitochondrial Genome
Source: MDPI journal article supplement (doi:10.3390/ijms24054373), 2023-02-22

**Supplementary File S8, Table S1**

| <b>Comparison</b> |                    | <b>Count number</b>    | <b>Count number obtained</b> |
|-------------------|--------------------|------------------------|------------------------------|
|                   |                    | <b>from simulation</b> | <b>from mt_R find</b>        |
| <b>Filename</b>   | stimulated-file-1  | 25165                  | 25165                        |
|                   | stimulated-file-2  | 26740                  | 26740                        |
|                   | stimulated-file-3  | 26328                  | 26328                        |
|                   | stimulated-file-4  | 28058                  | 28058                        |
|                   | <b>Total count</b> | <b>106291</b>          | <b>106291</b>                |
| <b>Bio type</b>   | mt_rRNA            | <b>7182</b>            | <b>7182</b>                  |
|                   | mt_tRNA            | 71568                  | 71568                        |
|                   | Non protein-coding | 7252                   | 7252                         |
|                   | Protein coding     | 20289                  | 20289                        |
|                   | <b>Total count</b> | <b>106291</b>          | <b>106291</b>                |

**Table S2**

| <b>Mitochondrial gene</b> | <b>Start position</b> | <b>End position</b> | <b>Strand</b> |
|---------------------------|-----------------------|---------------------|---------------|
| <b>tRNA-Phe</b>           | 577                   | 647                 | Heavy         |
| <b>mtSSU rRNA</b>         | 648                   | 1601                | Heavy         |
| <b>tRNA-Val</b>           | 1602                  | 1670                | Heavy         |
| <b>mtLSU rRNA</b>         | 1671                  | 3229                | Heavy         |
| <b>tRNA-Leu</b>           | 3230                  | 3304                | Heavy         |
| <b>ND1</b>                | 3307                  | 4262                | Heavy         |
| <b>tRNA-Ile</b>           | 4263                  | 4331                | Heavy         |
| <b>tRNA-Gln</b>           | 4329                  | 4400                | Light         |
| <b>tRNA-Met</b>           | 4402                  | 4469                | Heavy         |
| <b>ND2</b>                | 4470                  | 5511                | Heavy         |
| <b>tRNA-Trp</b>           | 5512                  | 5579                | Heavy         |
| <b>tRNA-Ala</b>           | 5587                  | 5655                | Light         |
| <b>tRNA-Asn</b>           | 5657                  | 5729                | Light         |
| <b>tRNA-Cys</b>           | 5761                  | 5826                | Light         |
| <b>tRNA-Tyr</b>           | 5826                  | 5891                | Light         |
| <b>COI</b>                | 5904                  | 7445                | Heavy         |
| <b>tRNA-Ser1</b>          | 7446                  | 7514                | Light         |
| <b>tRNA-Asp</b>           | 7518                  | 7585                | Heavy         |
| <b>COII</b>               | 7586                  | 8269                | Heavy         |
| <b>tRNA-Lys</b>           | 8295                  | 8364                | Heavy         |
| <b>ATP8</b>               | 8366                  | 8572                | Heavy         |
| <b>ATP6</b>               | 8527                  | 9207                | Heavy         |
| <b>COIII</b>              | 9207                  | 9990                | Heavy         |
| <b>tRNA-Gly</b>           | 9991                  | 10058               | Heavy         |
| <b>ND3</b>                | 10059                 | 10404               | Heavy         |
| <b>tRNA-Arg</b>           | 10405                 | 10469               | Heavy         |
| <b>ND4L</b>               | 10470                 | 10766               | Heavy         |

|                  |       |       |       |
|------------------|-------|-------|-------|
| <b>ND4</b>       | 10760 | 12137 | Heavy |
| <b>tRNA-His</b>  | 12138 | 12206 | Heavy |
| <b>tRNA-Ser2</b> | 12207 | 12265 | Heavy |
| <b>tRNA-Leu2</b> | 12266 | 12336 | Heavy |
| <b>ND5</b>       | 12337 | 14148 | Heavy |
| <b>ND6</b>       | 14149 | 14673 | Light |
| <b>tRNA-Glu</b>  | 14674 | 14742 | Light |
| <b>CytB</b>      | 14747 | 15887 | Heavy |
| <b>tRNA-Thr</b>  | 15888 | 15953 | Heavy |
| <b>tRNA-Pro</b>  | 15956 | 16023 | Light |

**Table S3**

| <b>Gene</b> | <b>Acronym</b> | <b>Type</b>  | <b>Criteria</b>                                                                                                                                                                                            |
|-------------|----------------|--------------|------------------------------------------------------------------------------------------------------------------------------------------------------------------------------------------------------------|
| <b>tRNA</b> | tRF-1          | tRF-1        | Mt-sRNAs mapping to 3' end of rRNA or protein-coding genes preceding a mitochondrial tRNA gene.                                                                                                            |
|             | tRF-2          | tRNA-half-5' | 1) The sequence is longer than or equal to a half of the total gene length, and the sequence spans the 5' half of a tRNA gene. 2) Sequence start position is $\pm 3$ nt from the tRNA gene start position. |
|             | tRF-4          | tRNA-half-3' | 1) The sequence is longer than or equal to a half of the total gene length, and the sequence spans the 3' half of a tRNA gene. 2) Sequence end position is $\pm 3$ nt from the tRNA gene end position.     |
|             | tRF-5          | tRF-5'       | 1) The sequence is shorter than a half of the total gene length. 2) Sequence start position is $\pm 3$ nt from the tRNA gene start position.                                                               |
|             | tRF-3          | tRF-3'       | 1) The sequence is shorter than a half of the total gene length. 2) Sequence end position is $\pm 3$ nt from the tRNA gene end position.                                                                   |
|             | tRF-6          | i-tRF-5      | 1) The sequence is shorter than a half of the total gene length. 2) Sequence start position is within 5' half of tRNA, and it is not within a range $\pm 3$ nt from the tRNA gene start position.          |
|             | tRF-7          | i-tRF-3      | 1) The sequence is shorter than a half of the total gene length. 2) Sequence start position is within 3' half of tRNA, and its end                                                                         |

position is not within a range  $\pm 3$  nt from the tRNA gene end position.

|                                |      |             |                                                                                                                                                                                                        |
|--------------------------------|------|-------------|--------------------------------------------------------------------------------------------------------------------------------------------------------------------------------------------------------|
| <b>protein<br/>coding/rRNA</b> | 5H   | 5prime-half | 1) Sequence length is greater than or equal to half the length of total gene length and sequence spans the 5' half of gene boundary. 2) Sequence start position is $\pm 3$ from the gene end position. |
|                                | 3H   | 3prime-half | 1) Sequence length is greater than or equal to half the length of total gene length and sequence spans the 3' half of gene boundary 2) Sequence end position is $\pm 3$ from the gene start position.  |
|                                | 5p   | 5prime      | Sequence end position is $\pm 3$ from the gene end position.                                                                                                                                           |
|                                | 3p   | 3prime      | Sequence start position is $\pm 3$ from the gene start position.                                                                                                                                       |
|                                | i-5p | i-5prime    | Sequence end position is not in $\pm 3$ from the gene start position and is within 5' half of gene length.                                                                                             |
|                                | i-3p | i-3prime    | Sequence start position is within 3' half of gene and not $\pm 3$ from the gene start position.                                                                                                        |
|                                |      |             |                                                                                                                                                                                                        |
|                                |      |             |                                                                                                                                                                                                        |

**Table S4**

| <b>Species</b>          | <b>Abbreviation</b> |
|-------------------------|---------------------|
| <i>Homo sapiens</i>     | hsa                 |
| <i>Danio rerio</i>      | dre                 |
| <i>Mus musculus</i>     | mmu                 |
| <i>Ratus norvegicus</i> | rno                 |
| <i>Xenopus</i> sp.      | xen                 |
| <i>Gallus gallus</i>    | gga                 |

**Table S5**

| <b>Strand</b> | <b>Region</b>      | <b>% distribution</b> | <b>Type</b>        | <b>sub-distribution</b> | <b>Orientation</b> | <b>Substitutions</b> | <b>Length</b>                     |
|---------------|--------------------|-----------------------|--------------------|-------------------------|--------------------|----------------------|-----------------------------------|
| <b>H</b>      | 28                 | 15                    | itRF-5, itRF-3 and | 15 %                    | sense              | no                   | 15-35                             |
|               | genes              |                       | randomly fragments |                         |                    |                      |                                   |
|               | tRNA               | 40                    | tRNA-half-3        | 7.5%                    | sense              | no                   | half the length<br>of mature tRNA |
|               |                    |                       | tRF-1              | 7.5%                    | sense              | no                   | 16-21                             |
|               |                    |                       | tRF-5              | 10 %                    | sense              | yes                  | 18-22                             |
|               |                    |                       | tRF-3              | 7.5%                    | sense              | no                   | 15-20                             |
|               |                    |                       | tRNA-half-5        | 7.5%                    | sense              | yes                  | half the length<br>of mature tRNA |
|               | protein-           | 20                    | random             | 15                      | sense              | no                   | 15-22                             |
|               | coding             |                       |                    | 5                       | anti-sense         | no                   | 22-25                             |
|               | rRNA               | 20                    | random             | 15                      | sense              | no                   | 15-24                             |
|               |                    |                       |                    | 5                       | anti-sense         | no                   | 18-23                             |
| <b>L</b>      | random<br>location | 5                     | coding             | 5                       | sense              | no                   | 15-35                             |

**Table S6**

| <b>Total no. of<br/>sequences</b> | <b>Length of<br/>sequence<br/>(range)</b> | <b>Strand</b> | <b>Distribution</b> | <b>Region</b>  | <b>Orientation</b> | <b>Substitutions</b> |
|-----------------------------------|-------------------------------------------|---------------|---------------------|----------------|--------------------|----------------------|
| 16                                | 75-150                                    | H             | 1                   | non-<br>coding | sense              | no                   |
|                                   |                                           |               | 6                   | coding         | sense              | no                   |
|                                   |                                           |               | 4                   | coding         | anti-sense         | yes                  |
|                                   |                                           | L             | 5                   | coding         | sense              | no                   |
|                                   |                                           |               |                     |                |                    |                      |

Figure S1

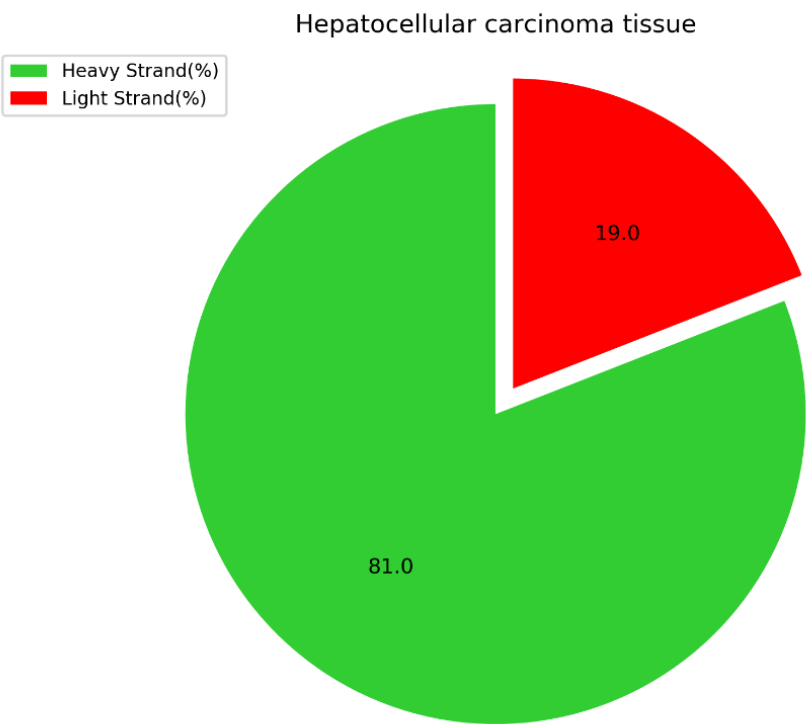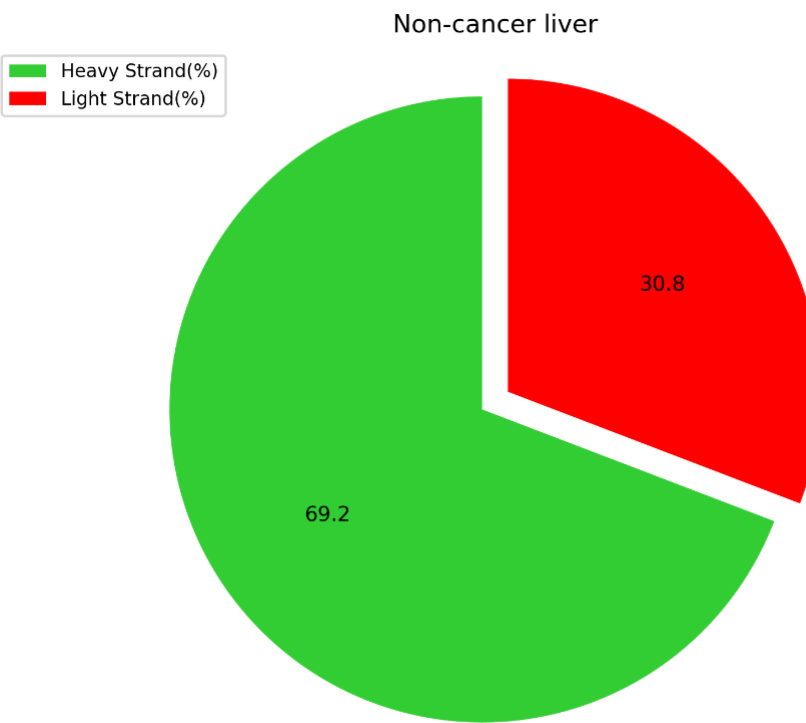



Figure S2

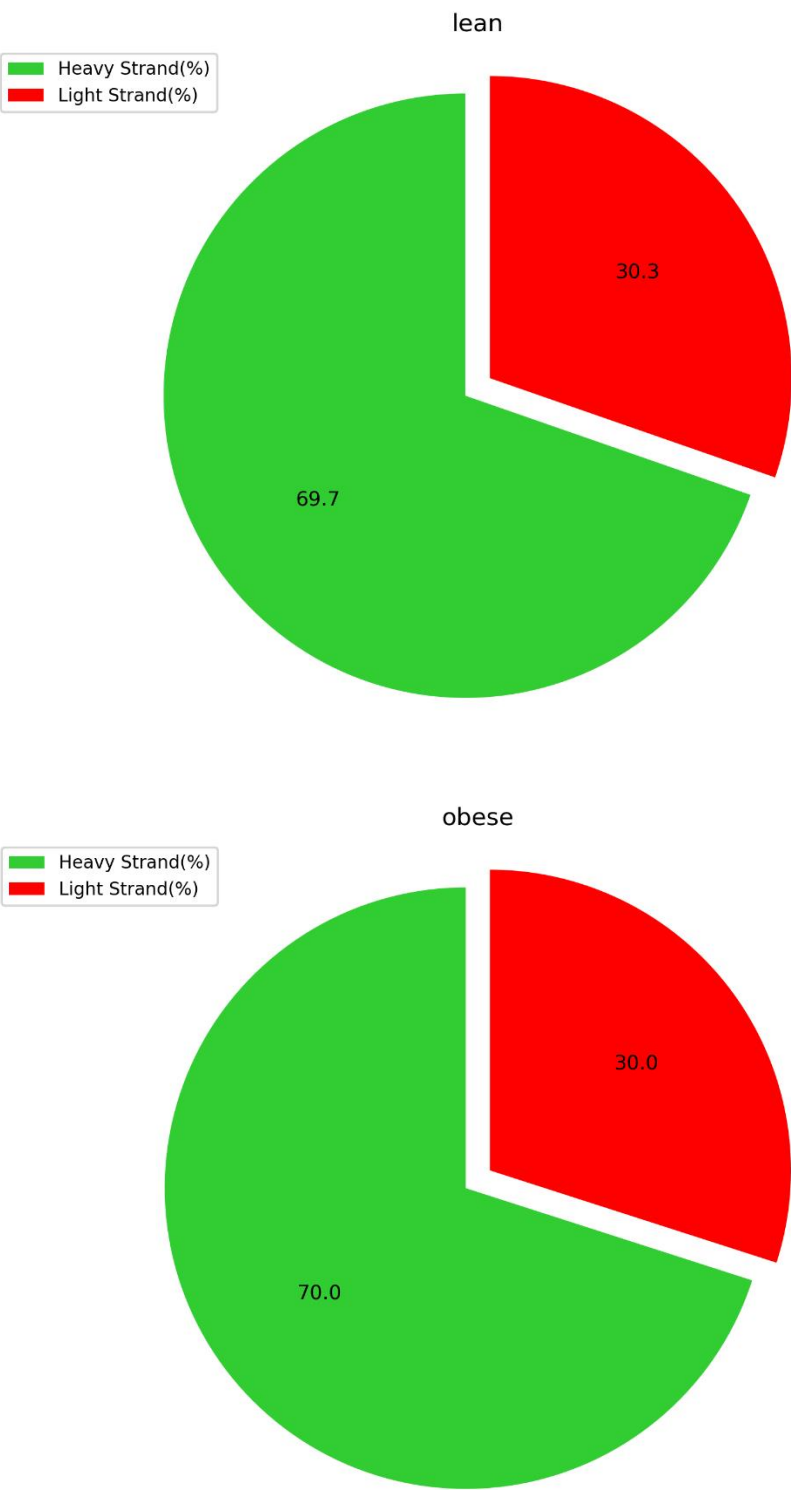

Figure S3

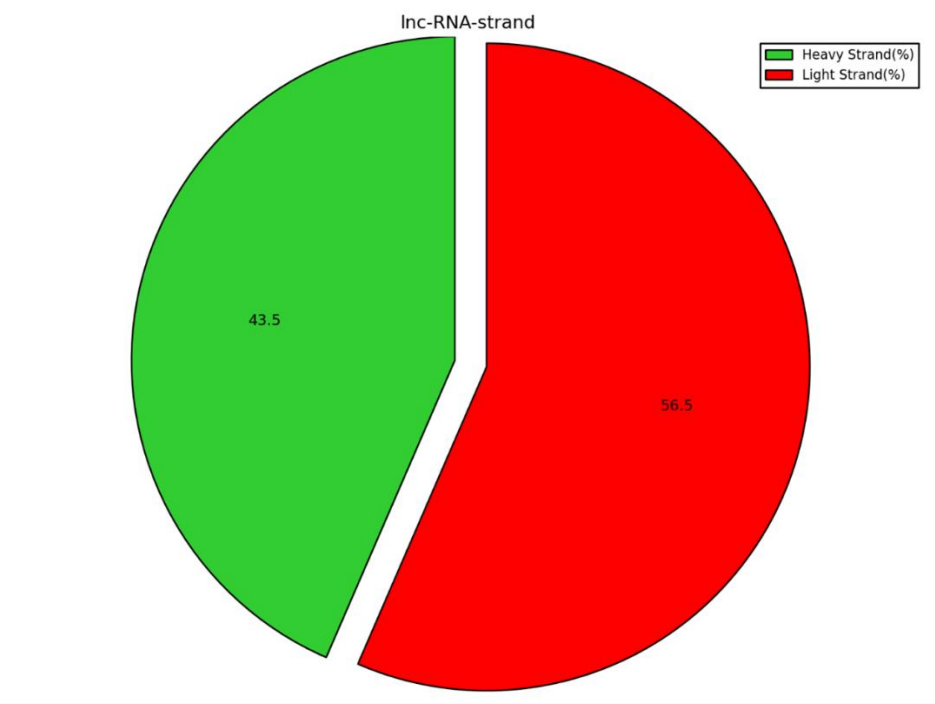

Figure S4A

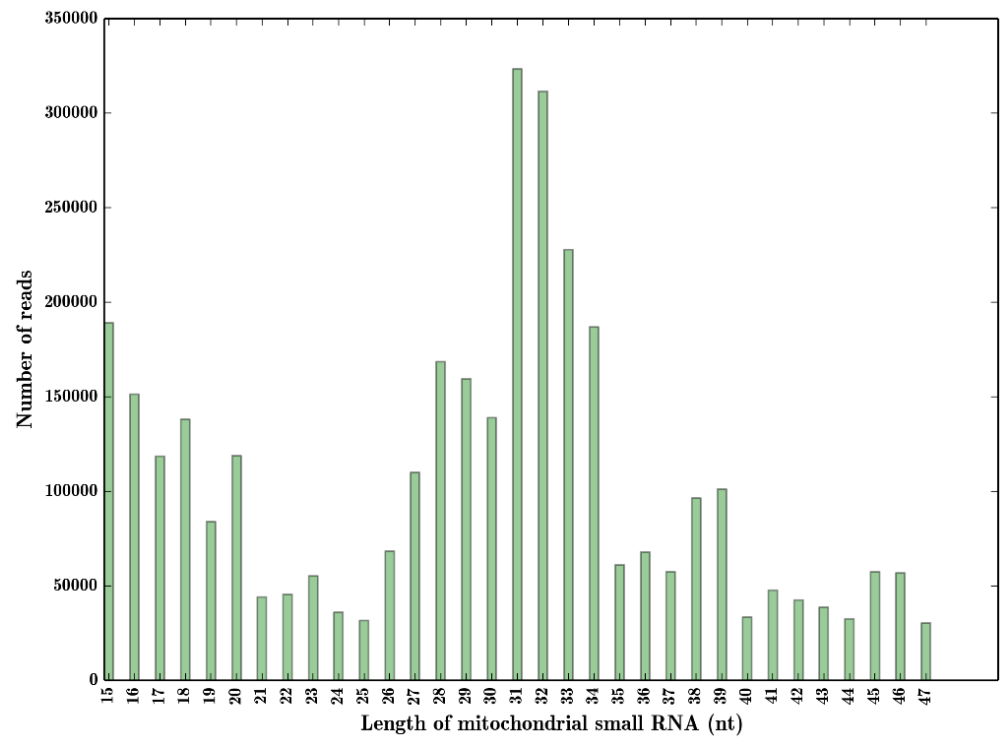

Figure S4B

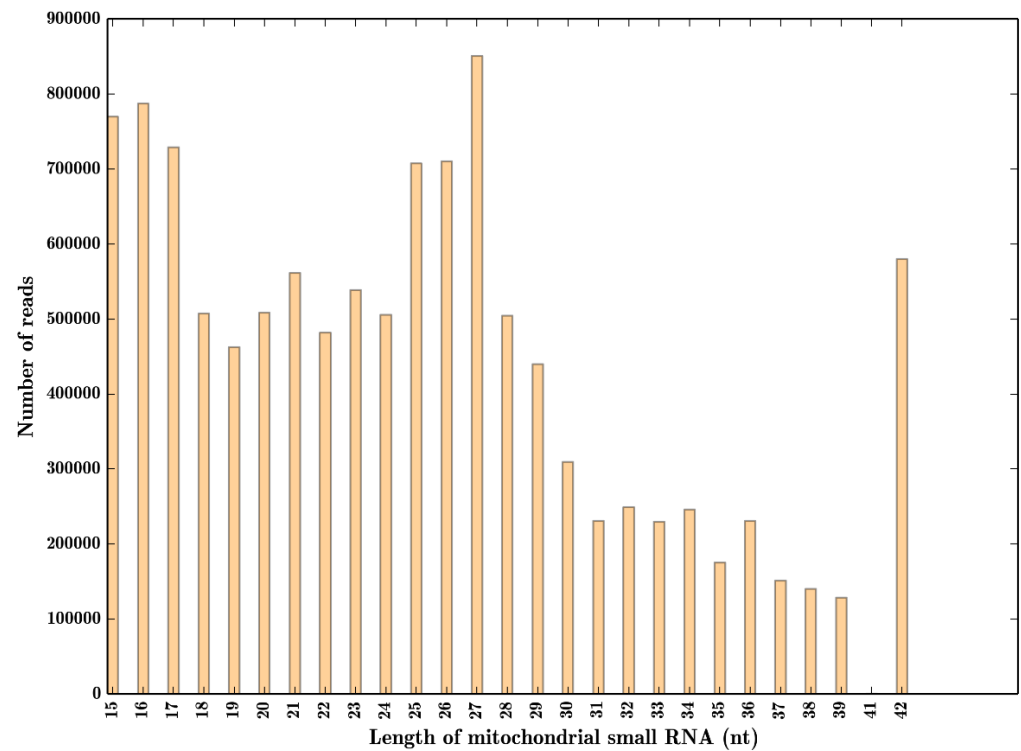

Figure S4C

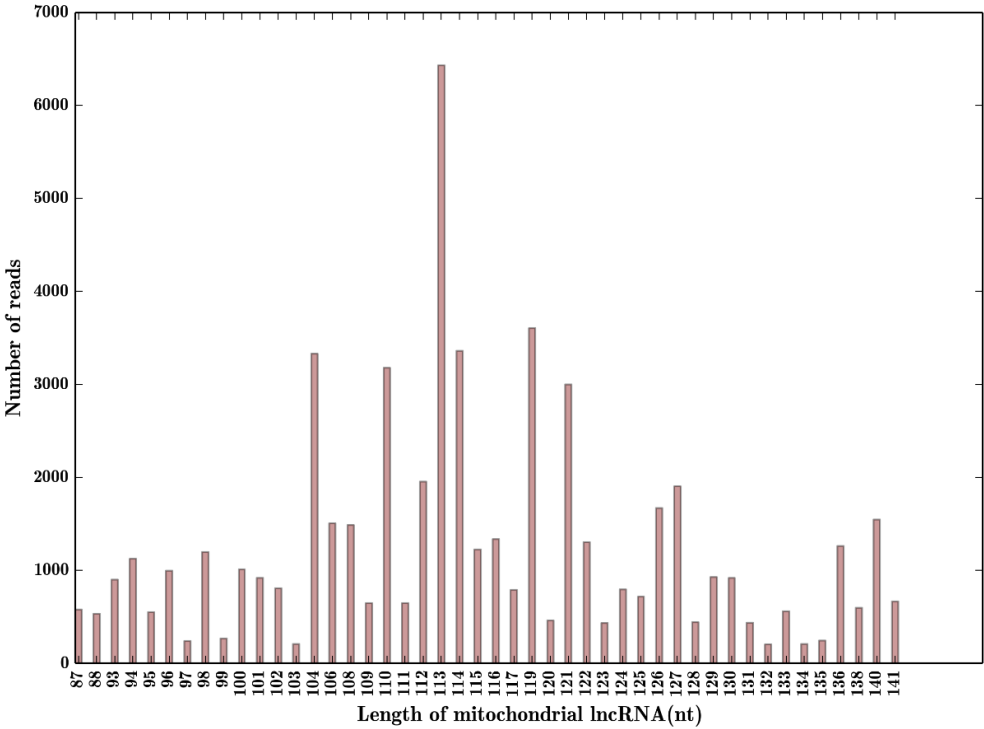

Figure S5A

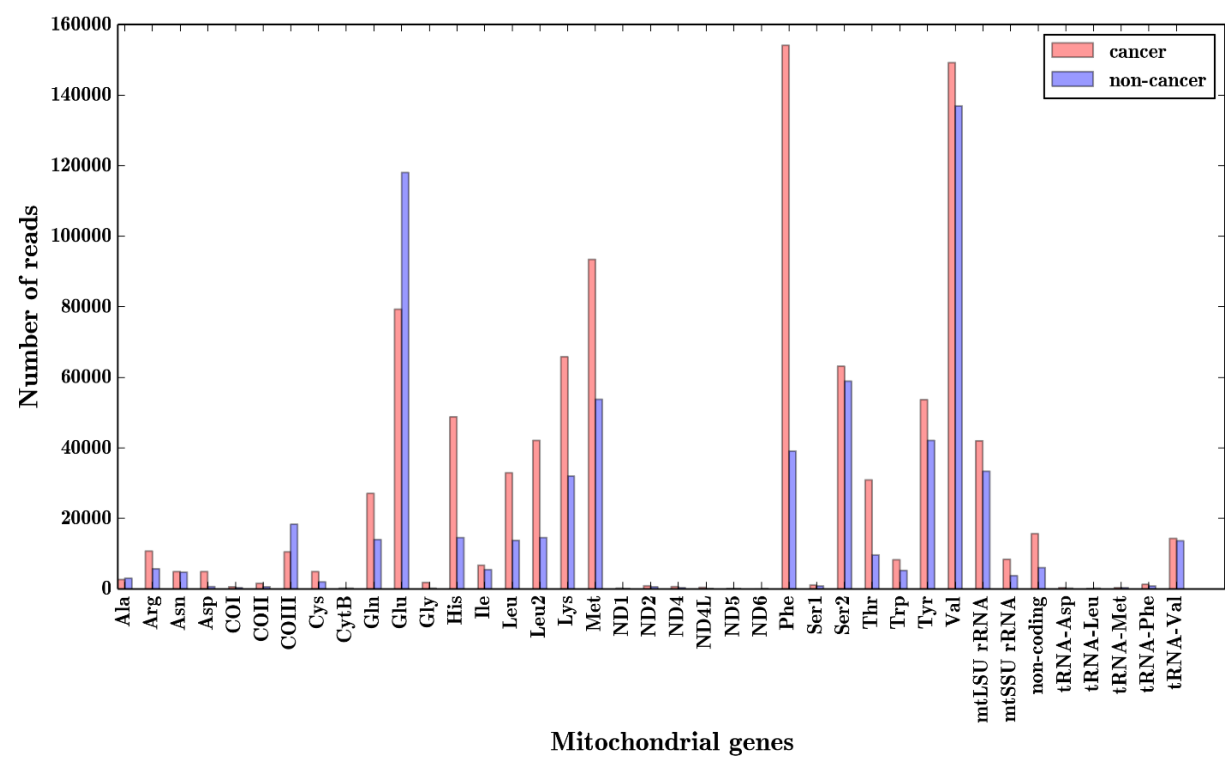

Figure S5B

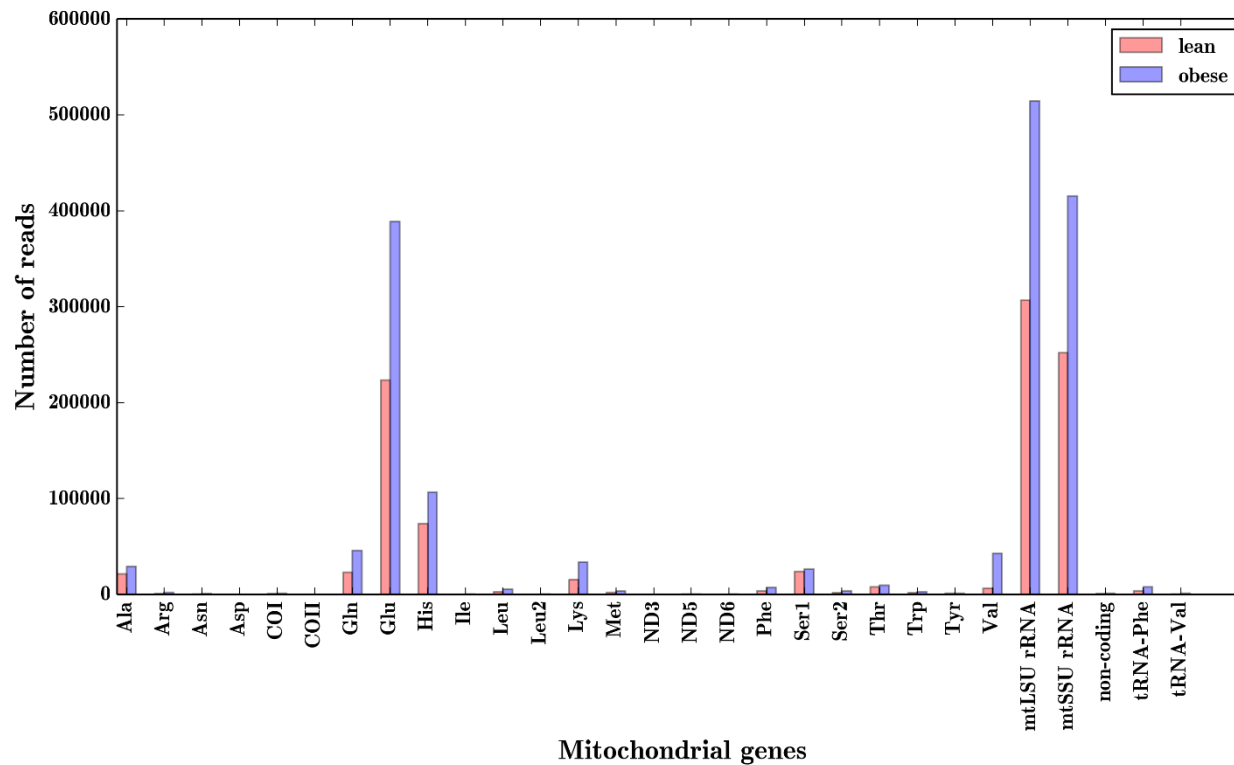

Figure S5C

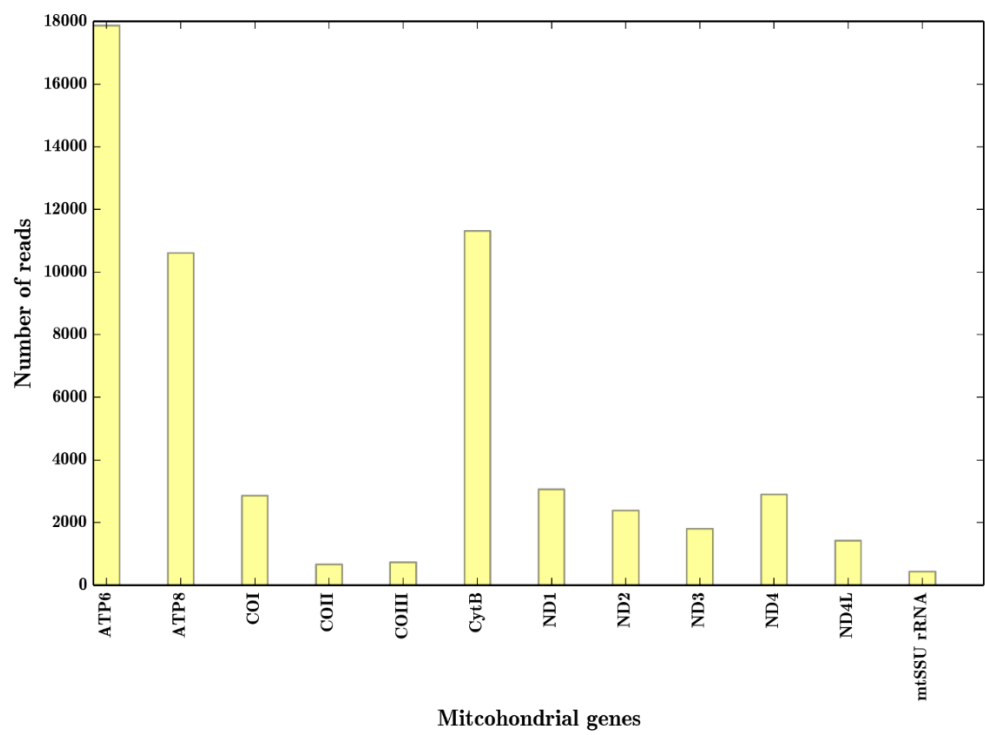

Figure S6

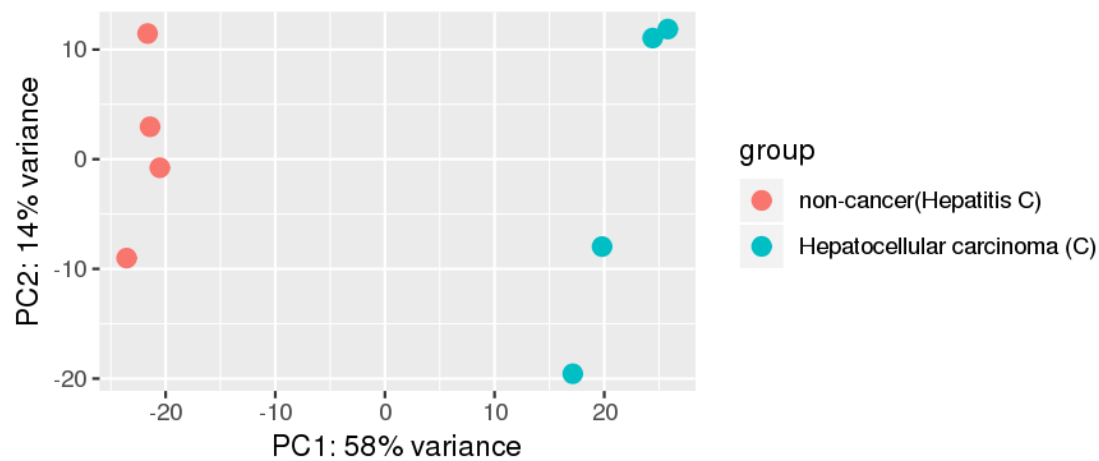

Figure S7

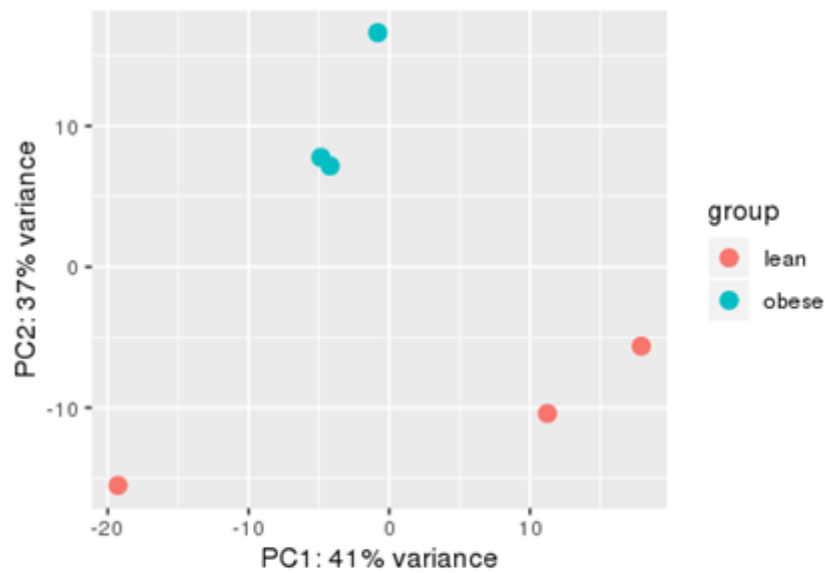

Supplement: s1 [file s1]
