# Supplementary material for: mtR_find: A Parallel Processing Tool to Identify and Annotate RNAs Derived from the Mitochondrial Genome
Source: Int J Mol Sci. 2023 Feb 22;24(5):4373. doi: 10.3390/ijms24054373 (PMC10001721; doi:10.3390/ijms24054373)
Supplement: Supplementary file 1 [file ijms-24-04373-s001.zip]

Archive with 14 entries (14 files):
- Supplementary File S1.xlsx
- Supplementary File S10.csv
- Supplementary File S11.csv
- Supplementary File S12.pdf
- Supplementary File S13.xlsx
- Supplementary File S14.pdf
- Supplementary File S2.csv
- Supplementary File S3.csv
- Supplementary File S4.csv
- Supplementary File S5.csv
- Supplementary File S6.csv
- Supplementary File S7.csv
- Supplementary File S8.pdf
- Supplementary File S9.xlsx
