# Supplementary material for: mtR_find: A Parallel Processing Tool to Identify and Annotate RNAs Derived from the Mitochondrial Genome
Source: Int J Mol Sci. 2023 Feb 22;24(5):4373. doi: 10.3390/ijms24054373 (PMC10001721; doi:10.3390/ijms24054373)
Supplement: Supplementary file 1 [file ijms-24-04373-s001.zip › Supplementary File S1.xlsx]

## Sheet: dataset-1
filename	total-count
SRR1274001	5368560
SRR1274002	6447089
SRR1273999	8611870
SRR1274006	9427472
SRR1273998	10538041
SRR1274015	9946219
SRR1274014	10599484
SRR1274007	9767600
SRR1274010	15625350
SRR1274009	15301438
SRR1274011	17123070
SRR1274004	17174774
SRR1274016	17665875
SRR1274008	17666666
SRR1274017	18284699
SRR1274012	20116487
SRR1274005	21273689
SRR1274003	23183729
SRR1274013	31431715
SRR1274000	46737110
Total count	332290937

## Sheet: dataset-2
filename	total-count
SRR2845754	2599854
SRR2845766	3664100
SRR2845753	4181243
SRR2845767	5182938
SRR2845758	8069552
SRR2845755	6819375
SRR2845771	7269117
SRR2845760	11314123
SRR2845761	10873205
SRR2845774	12463367
SRR2845764	14397118
SRR2845770	11762151
SRR2845773	15758957
SRR2845763	17806350
SRR2845768	16903611
SRR2845775	18453723
SRR2845772	20325948
SRR2845757	15860384
SRR2845762	22187764
SRR2845756	23674404
SRR2845769	20234453
SRR2845759	24147145
SRR2845765	24236807
Total count	318185689

## Sheet: dataset-3
filename	total-count
ERR1433131	34348546
ERR1433132	38611709
ERR2705002	20449464
Total count	93409719
