# Supplementary material for: mtR_find: A Parallel Processing Tool to Identify and Annotate RNAs Derived from the Mitochondrial Genome
Source: Int J Mol Sci. 2023 Feb 22;24(5):4373. doi: 10.3390/ijms24054373 (PMC10001721; doi:10.3390/ijms24054373)
Supplement: Supplementary file 1 [file ijms-24-04373-s001.zip › Supplementary File S7.csv]

sequence	Specific-ID	General-ID	Length	type	bio-type	strand	orientation	annotation	Sequence alignment	Sequence start position(bp)	Sequence end position(bp)	gene-boundary:start(bp)	gene-boundary:end(bp)	substitutions	total_count	ERR1433131	ERR1433132	ERR2705002
AAAAAACCCACGATCAACTGAAGCAGCAACAAAATACTTCGTCACACAAGCAACAGCCTCAATAATTATCCTCCTGGCCATCGTACTCAACTATAAACAACTAGGAACATGAATATTTC	mmu|mt-lncRNA|ND2|H|4054|119	mmu|mt-lncRNA|ND2|H|4054	119	mt-lncRNA	protein_coding	H	sense	ND2	seq start site inside gene	4054	4172	3914	4951		264	178.0	86.0	0.0
AAAAAGCTCACTTGCCCACTTCCTTCCACAAGGAACTCCAATTTCACTAATTCCAATACTTATTATTATTGAAACAATTAGCCTATTTATTCAACCAATGGCATTAGCAGTCCG	mmu|mt-lncRNA|ATP6|H|8289|114	mmu|mt-lncRNA|ATP6|H|8289	114	mt-lncRNA	protein_coding	H	sense	ATP6	seq start site inside gene	8289	8402	7927	8607		324	195.0	126.0	3.0
AAAAAGCTCACTTGCCCACTTCCTTCCACAAGGAACTCCAATTTCACTAATTCCAATACTTATTATTATTGAAACAATTAGCCTATTTATTCAACCAATGGCATTAGCAGTCCGG	mmu|mt-lncRNA|ATP6|H|8289|115	mmu|mt-lncRNA|ATP6|H|8289	115	mt-lncRNA	protein_coding	H	sense	ATP6	seq start site inside gene	8289	8403	7927	8607		252	156.0	92.0	4.0
AAACAATTAGCCTATTTATTCAACCAATGGCATTAGCAGTCCGGCTTACAGCTAACATTACTGCAGGACACTTATTAATACACCTAATCGGAG	mmu|mt-lncRNA|ATP6|H|8360|93	mmu|mt-lncRNA|ATP6|H|8360	93	mt-lncRNA	protein_coding	H	sense	ATP6	seq start site inside gene	8360	8452	7927	8607		253	132.0	121.0	0.0
AAACAATTAGCCTATTTATTCAACCAATGGCATTAGCAGTCCGGCTTACAGCTAACATTACTGCAGGACACTTATTAATACACCTAATCGGAGGAGCTACTCTAGTATTAATAAATATTAG	mmu|mt-lncRNA|ATP6|H|8360|121	mmu|mt-lncRNA|ATP6|H|8360	121	mt-lncRNA	protein_coding	H	sense	ATP6	seq start site inside gene	8360	8480	7927	8607		274	169.0	104.0	1.0
AACAAATCCTGCTATGATAGCAAACACTGCTCCCATTGATAGAACATAGTGGAAATGGGCTACTACATAGTATGTATCGTGAAGCACGATGTCAAGGGATGAGTTGGATAAAAC	mmu|mt-lncRNA|COI|L|6396|114	mmu|mt-lncRNA|COI|L|6396	114	mt-lncRNA	protein_coding	L	anti-sense	COI	seq start site inside gene	6396	6509	5328	6872		221	105.0	116.0	0.0
ATTAAAATGAACGAAAATCTATTTGCCTCATTCATTACCCCAACAATAATAGGATTCCCAATCGTTGTAGCCATCATTATATTTCCTTCAATCCTATTCCCATCCTCAAAACGCC	mmu|mt-lncRNA|ATP8|H|7921|115	mmu|mt-lncRNA|ATP8|H|7921	115	mt-lncRNA	protein_coding	H	sense	ATP8	seq start site inside gene	7921	8035	7766	7969		231	109.0	122.0	0.0
ATTCTTTCCAACACTGACTAGTTAAACTTATTATCAAACAAATAATGCTAATCCACACACCAAAAGGACGAACATGAACCCTAATAATTGTTTCCCTAATCATATTTATTGGATCAACA	mmu|mt-lncRNA|ATP6|H|8054|119	mmu|mt-lncRNA|ATP6|H|8054	119	mt-lncRNA	protein_coding	H	sense	ATP6	seq start site inside gene	8054	8172	7927	8607		225	127.0	97.0	1.0
ATTTTATTATCCCTAACGCTAATTCTAGTTGCATTCTGACTCCCCCAAATAAATCTGTACTCAGAAAAAGCAAATCCATATGAATGCGGATTCGAC	mmu|mt-lncRNA|ND3|H|9489|96	mmu|mt-lncRNA|ND3|H|9489	96	mt-lncRNA	protein_coding	H	sense	ND3	seq start site inside gene	9489	9584	9459	9806		291	147.0	144.0	0.0
CAAAATCTCAACCTACTACAATGCTAAAAATTATTCTTCCCTCACTAATGCTACTACCACTAACCTGACTATCAAGCCCTAAAAAAAC	mmu|mt-lncRNA|ND4L|H|10147|88	mmu|mt-lncRNA|ND4L|H|10147	88	mt-lncRNA	protein_coding	H	sense	ND4L	seq start site inside gene	10147	10234	9877	10173		268	173.0	95.0	0.0
CAAAATCTCAACCTACTACAATGCTAAAAATTATTCTTCCCTCACTAATGCTACTACCACTAACCTGACTATCAAGCCCTAAAAAAACCTGAACAAAC	mmu|mt-lncRNA|ND4L|H|10147|98	mmu|mt-lncRNA|ND4L|H|10147	98	mt-lncRNA	protein_coding	H	sense	ND4L	seq start site inside gene	10147	10244	9877	10173		235	134.0	101.0	0.0
CAAACACGTACGGAACAGATTACGTCCAAAATCTCAACCTACTACAATGCTAAAAATTATTCTTCCCTCACTAATGCTACTACCACTAACCTGACTATCAAGCCCTAAAAAAAC	mmu|mt-lncRNA|ND4L|H|10121|114	mmu|mt-lncRNA|ND4L|H|10121	114	mt-lncRNA	protein_coding	H	sense	ND4L	seq start site inside gene	10121	10234	9877	10173		335	225.0	110.0	0.0
CAAACATTCCCACTGGCACCTTCACCAAAATCACTAACAACCATAAAAGTAAAAACCCCTTGAGAATTAAAATGAACGAAAATCTATTTGCCTCATTCATTACCCCAACAATAATAGGATTCCCA	mmu|mt-lncRNA|ATP8|H|7856|125	mmu|mt-lncRNA|ATP8|H|7856	125	mt-lncRNA	protein_coding	H	sense	ATP8	seq start site inside gene	7856	7980	7766	7969		275	176.0	98.0	1.0
CAAAGATATCCTAGGTATCCTAATCATATTCTTAATTCTCATAACCCTAGTATTATTTTTCCCAGACATACTAGGAGACCCAGACAACTACATACCAG	mmu|mt-lncRNA|CytB|H|14822|98	mmu|mt-lncRNA|CytB|H|14822	98	mt-lncRNA	protein_coding	H	sense	CytB	seq start site inside gene	14822	14919	14145	15288		254	165.0	89.0	0.0
CAAAGATATCGGAACCCTCTATCTACTATTCGGAGCCTGAGCGGGAATAGTGGGTACTGCACTAAGTATTTTAATTCGAGCAGAATTAGGTCAACCAGGTGCACTTTTA	mmu|mt-lncRNA|COI|H|5363|109	mmu|mt-lncRNA|COI|H|5363	109	mt-lncRNA	protein_coding	H	sense	COI	seq start site inside gene	5363	5471	5328	6872		205	108.0	97.0	0.0
CAAAGATATCGGAACCCTCTATCTACTATTCGGAGCCTGAGCGGGAATAGTGGGTACTGCACTAAGTATTTTAATTCGAGCAGAATTAGGTCAACCAGGTGCACTTTTAGGAGATGACCAAATTTAC	mmu|mt-lncRNA|COI|H|5363|127	mmu|mt-lncRNA|COI|H|5363	127	mt-lncRNA	protein_coding	H	sense	COI	seq start site inside gene	5363	5489	5328	6872		242	152.0	90.0	0.0
CAACAACCGTCTCCATTCTTTCCAACACTGACTAGTTAAACTTATTATCAAACAAATAATGCTAATCCACACACCAAAAGGACGAACATGAACCCTAATAATTGTTTCCCTAATCATATTTATTGGATCAACA	mmu|mt-lncRNA|ATP6|H|8040|133	mmu|mt-lncRNA|ATP6|H|8040	133	mt-lncRNA	protein_coding	H	sense	ATP6	seq start site inside gene	8040	8172	7927	8607		254	154.0	100.0	0.0
CAACAATGTTAGGGCCTTTTCGTAGTTGTATGTACCCTAAGATTTTGCGTTCTACTAATGTTAGGAAGGCTATGGCGATTAGAATGGGGACGAG	mmu|mt-lncRNA|ND1|L|2778|94	mmu|mt-lncRNA|ND1|L|2778	94	mt-lncRNA	protein_coding	L	anti-sense	ND1	seq start site inside gene	2778	2871	2751	3707		284	190.0	94.0	0.0
CAACATTTCATCATGATGAAACTTTGGGTCCCTTCTAGGAGTCTGCCTAATAGTCCAAATCATTACAGGTCTTTTCTTAGCCATACACTACACATCAG	mmu|mt-lncRNA|CytB|H|14219|98	mmu|mt-lncRNA|CytB|H|14219	98	mt-lncRNA	protein_coding	H	sense	CytB	seq start site inside gene	14219	14316	14145	15288		226	134.0	92.0	0.0
CAACCGTCTCCATTCTTTCCAACACTGACTAGTTAAACTTATTATCAAACAAATAATGCTAATCCACACACCAAAAGGACGAACATGAACCCTAATAATTGTTTCCCTAATCATATTTATTGGATCAACA	mmu|mt-lncRNA|ATP6|H|8043|130	mmu|mt-lncRNA|ATP6|H|8043	130	mt-lncRNA	protein_coding	H	sense	ATP6	seq start site inside gene	8043	8172	7927	8607		241	165.0	75.0	1.0
CAACTATCCATAAATCTAAGTATAGCCATTCCACTATGAGCTGGAGCCGTAATTACAGGCTTCCGACACAAACTAAAAAGCTCACTTGCCCACTTCCTTCCACAAGGAACTCCAATTTCAC	mmu|mt-lncRNA|ATP6|H|8215|121	mmu|mt-lncRNA|ATP6|H|8215	121	mt-lncRNA	protein_coding	H	sense	ATP6	seq start site inside gene	8215	8335	7927	8607		380	198.0	182.0	0.0
CAATTATTAGGGTTCATGTTCGTCCTTTTGGTGTGTGGATTAGCATTATTTGTTTGATAATAAGTTTAACTAGTCAGTGTTGGAAAGAATGGAGACGGTTGTTGATTAGGCGTTTTGAGGATGGGAATAGGATTGAAG	mmu|mt-lncRNA|ATP6|L|8006|138	mmu|mt-lncRNA|ATP6|L|8006	138	mt-lncRNA	protein_coding	L	anti-sense	ATP6	seq start site inside gene	8006	8143	7927	8607		330	201.0	126.0	3.0
CAGAACTCTACTCAACTAACTTCATAATAGAAGCTCTACTACTATCATCAACATTCCTATGGATCCGAGCATCTTATCCACGCTTCCGTTACGATCAACTTATACATCTTCTATGAAAAAAC	mmu|mt-lncRNA|ND1|H|3505|122	mmu|mt-lncRNA|ND1|H|3505	122	mt-lncRNA	protein_coding	H	sense	ND1	seq start site inside gene	3505	3626	2751	3707		487	334.0	153.0	0.0
CAGTAATGTTAGCTGTAAGCCGGACTGCTAATGCCATTGGTTGAATAAATAGGCTAATTGTTTCAATAATAATAAGTATTGGAATTAGTGAAATTGGAGTTCCTTGTGGAAGGAAG	mmu|mt-lncRNA|ATP6|L|8307|116	mmu|mt-lncRNA|ATP6|L|8307	116	mt-lncRNA	protein_coding	L	anti-sense	ATP6	seq start site inside gene	8307	8422	7927	8607		211	125.0	86.0	0.0
CATAAATCTAAGTATAGCCATTCCACTATGAGCTGGAGCCGTAATTACAGGCTTCCGACACAAACTAAAAAGCTCACTTGCCCACTTCCTTCCACAAGGAACTCCAATTTCAC	mmu|mt-lncRNA|ATP6|H|8223|113	mmu|mt-lncRNA|ATP6|H|8223	113	mt-lncRNA	protein_coding	H	sense	ATP6	seq start site inside gene	8223	8335	7927	8607		403	211.0	192.0	0.0
CATTCATTGACCTACCTGCCCCATCCAACATTTCATCATGATGAAACTTTGGGTCCCTTCTAGGAGTCTGCCTAATAGTCCAAATCATTACAGGTCTTTTCTTAGCCATACACTACACATCAG	mmu|mt-lncRNA|CytB|H|14194|123	mmu|mt-lncRNA|CytB|H|14194	123	mt-lncRNA	protein_coding	H	sense	CytB	seq start site inside gene	14194	14316	14145	15288		209	140.0	69.0	0.0
CATTGACCTACCTGCCCCATCCAACATTTCATCATGATGAAACTTTGGGTCCCTTCTAGGAGTCTGCCTAATAGTCCAAATCATTACAGGTCTTTTCTTAGCCATACACTACACATCAG	mmu|mt-lncRNA|CytB|H|14198|119	mmu|mt-lncRNA|CytB|H|14198	119	mt-lncRNA	protein_coding	H	sense	CytB	seq start site inside gene	14198	14316	14145	15288		304	197.0	105.0	2.0
CCAACACTGACTAGTTAAACTTATTATCAAACAAATAATGCTAATCCACACACCAAAAGGACGAACATGAACCCTAATAATTGTTTCCCTAATCATATTTATTGGATCAACA	mmu|mt-lncRNA|ATP6|H|8061|112	mmu|mt-lncRNA|ATP6|H|8061	112	mt-lncRNA	protein_coding	H	sense	ATP6	seq start site inside gene	8061	8172	7927	8607		512	331.0	178.0	3.0
CCCAGACATACTAGGAGACCCAGACAACTACATACCAGCTAATCCACTAAACACCCCACCCCATATTAAACCCGAATGATATTTCCTATTTGCATACGCC	mmu|mt-lncRNA|CytB|H|14882|100	mmu|mt-lncRNA|CytB|H|14882	100	mt-lncRNA	protein_coding	H	sense	CytB	seq start site inside gene	14882	14981	14145	15288		210	142.0	68.0	0.0
CCCATTTCCACTATGTTCTATCAATGGGAGCAGTGTTTGCTATCATAGCAGGATTTGTTCACTGATTCCCATTATTTTCAGGCTTCACCCTAGATGACACATGAGCAAAA	mmu|mt-lncRNA|COI|H|6451|110	mmu|mt-lncRNA|COI|H|6451	110	mt-lncRNA	protein_coding	H	sense	COI	seq start site inside gene	6451	6560	5328	6872		237	107.0	127.0	3.0
CCGATATATACACGCAAACGGAGCCTCAATATTTTTTATTTGCTTATTCCTTCATGTCGGACGAGGCTTATATTATGGATCATATACATTTATAGAAACCTGAAACATTGGAG	mmu|mt-lncRNA|CytB|H|14381|113	mmu|mt-lncRNA|CytB|H|14381	113	mt-lncRNA	protein_coding	H	sense	CytB	seq start site inside gene	14381	14493	14145	15288		210	137.0	73.0	0.0
CCGGCTTACAGCTAACATTACTGCAGGACACTTATTAATACACCTAATCGGAGGAGCTACTCTAGTATTAATAAATATTAGCCCACCAACAGCTACCATTACATTTATTATTTTACTTCTACTCACAATTCTAGAATTTGC	mmu|mt-lncRNA|ATP6|H|8400|141	mmu|mt-lncRNA|ATP6|H|8400	141	mt-lncRNA	protein_coding	H	sense	ATP6	seq start site inside gene	8400	8540	7927	8607		322	200.0	121.0	1.0
CGAAAATCTATTTGCCTCATTCATTACCCCAACAATAATAGGATTCCCAATCGTTGTAGCCATCATTATATTTCCTTCAATCCTATTCCCATCCTCAAAAC	mmu|mt-lncRNA|ATP8|H|7932|101	mmu|mt-lncRNA|ATP8|H|7932	101	mt-lncRNA	protein_coding	H	sense	ATP8	seq start site inside gene	7932	8032	7766	7969		275	159.0	115.0	1.0
CGAAAATCTATTTGCCTCATTCATTACCCCAACAATAATAGGATTCCCAATCGTTGTAGCCATCATTATATTTCCTTCAATCCTATTCCCATCCTCAAAACGCC	mmu|mt-lncRNA|ATP8|H|7932|104	mmu|mt-lncRNA|ATP8|H|7932	104	mt-lncRNA	protein_coding	H	sense	ATP8	seq start site inside gene	7932	8035	7766	7969		1187	640.0	544.0	3.0
CGAAAATCTATTTGCCTCATTCATTACCCCAACAATAATAGGATTCCCAATCGTTGTAGCCATCATTATATTTCCTTCAATCCTATTCCCATCCTCAAAACGCCTAATCA	mmu|mt-lncRNA|ATP8|H|7932|110	mmu|mt-lncRNA|ATP8|H|7932	110	mt-lncRNA	protein_coding	H	sense	ATP8	seq start site inside gene	7932	8041	7766	7969		492	271.0	221.0	0.0
CGAAAATCTATTTGCCTCATTCATTACCCCAACAATAATAGGATTCCCAATCGTTGTAGCCATCATTATATTTCCTTCAATCCTATTCCCATCCTCAAAACGCCTAATCAAC	mmu|mt-lncRNA|ATP8|H|7932|112	mmu|mt-lncRNA|ATP8|H|7932	112	mt-lncRNA	protein_coding	H	sense	ATP8	seq start site inside gene	7932	8043	7766	7969		431	205.0	226.0	0.0
CGAAAATCTATTTGCCTCATTCATTACCCCAACAATAATAGGATTCCCAATCGTTGTAGCCATCATTATATTTCCTTCAATCCTATTCCCATCCTCAAAACGCCTAATCAACA	mmu|mt-lncRNA|ATP8|H|7932|113	mmu|mt-lncRNA|ATP8|H|7932	113	mt-lncRNA	protein_coding	H	sense	ATP8	seq start site inside gene	7932	8044	7766	7969		495	290.0	205.0	0.0
CGAACATGAACCCTAATAATTGTTTCCCTAATCATATTTATTGGATCAACAAATCTCCTAGGCCTTTTACCACATACATTTACACCTACTACCCAACTATCC	mmu|mt-lncRNA|ATP6|H|8122|102	mmu|mt-lncRNA|ATP6|H|8122	102	mt-lncRNA	protein_coding	H	sense	ATP6	seq start site inside gene	8122	8223	7927	8607		263	160.0	102.0	1.0
CGAACATGAACCCTAATAATTGTTTCCCTAATCATATTTATTGGATCAACAAATCTCCTAGGCCTTTTACCACATACATTTACACCTACTACCCAACTATCCATAAATCTAAG	mmu|mt-lncRNA|ATP6|H|8122|113	mmu|mt-lncRNA|ATP6|H|8122	113	mt-lncRNA	protein_coding	H	sense	ATP6	seq start site inside gene	8122	8234	7927	8607		718	401.0	317.0	0.0
CGAATAGTGAGTATTTGGAGTTTGAGGCTCATCCTGATCATAGAATGGAGTAAACTGATAGGCTAGATGTTGCTAAAATAAATAAAATCCCTAGGTTTAAA	mmu|mt-lncRNA|ND1|L|3041|101	mmu|mt-lncRNA|ND1|L|3041	101	mt-lncRNA	protein_coding	L	anti-sense	ND1	seq start site inside gene	3041	3141	2751	3707		221	122.0	99.0	0.0
CGATTAGTGATTTTAAATCTGTTTGGCGTAAGCAGATTGAGCTAGTTATAATTATTCCTCATAGGGAGAGAAGGATGAAGGGGTATGCTATATATTTTGTTAGTGGGTCTAGAATAATGGAGATGCG	mmu|mt-lncRNA|ND4|L|10899|127	mmu|mt-lncRNA|ND4|L|10899	127	mt-lncRNA	protein_coding	L	anti-sense	ND4	seq start site inside gene	10899	11025	10167	11544		242	170.0	72.0	0.0
CGCAGTCATAGCCACAGCATTTATAGGCTACGTCCTTCCATGAGGACAAATATCATTCTGAGGTGCCACAGTTATTACAAACCTCCTATCAGCCATCCCATATATTGGAACAACCCTAGTCGAATGAATTTGAG	mmu|mt-lncRNA|CytB|H|14507|134	mmu|mt-lncRNA|CytB|H|14507	134	mt-lncRNA	protein_coding	H	sense	CytB	seq start site inside gene	14507	14640	14145	15288		206	139.0	67.0	0.0
CGCATCTCCATTATTCTAGACCCACTAACAAAATATATAGCATACCCCTTCATCCTTCTCTCCCTATGAGGAATAATTATAACTAGCTCAATCTGCTTACGCCAAACAGATTTAAA	mmu|mt-lncRNA|ND4|H|10899|116	mmu|mt-lncRNA|ND4|H|10899	116	mt-lncRNA	protein_coding	H	sense	ND4	seq start site inside gene	10899	11014	10167	11544		209	130.0	78.0	1.0
CGCATCTCCATTATTCTAGACCCACTAACAAAATATATAGCATACCCCTTCATCCTTCTCTCCCTATGAGGAATAATTATAACTAGCTCAATCTGCTTACGCCAAACAGATTTAAAATCAC	mmu|mt-lncRNA|ND4|H|10899|121	mmu|mt-lncRNA|ND4|H|10899	121	mt-lncRNA	protein_coding	H	sense	ND4	seq start site inside gene	10899	11019	10167	11544		245	165.0	80.0	0.0
CGCATCTCCATTATTCTAGACCCACTAACAAAATATATAGCATACCCCTTCATCCTTCTCTCCCTATGAGGAATAATTATAACTAGCTCAATCTGCTTACGCCAAACAGATTTAAAATCACTAATCG	mmu|mt-lncRNA|ND4|H|10899|127	mmu|mt-lncRNA|ND4|H|10899	127	mt-lncRNA	protein_coding	H	sense	ND4	seq start site inside gene	10899	11025	10167	11544		228	151.0	77.0	0.0
CGCCATTCTACGCTCAATCCCCAATAAACTAGGAGGTGTCCTAGCCTTAATCTTATCTATCCTAATTTTAGCCCTAATACCTTTCCTTCATACCTCAAAG	mmu|mt-lncRNA|CytB|H|14978|100	mmu|mt-lncRNA|CytB|H|14978	100	mt-lncRNA	protein_coding	H	sense	CytB	seq start site inside gene	14978	15077	14145	15288		240	158.0	82.0	0.0
CGCCATTCTACGCTCAATCCCCAATAAACTAGGAGGTGTCCTAGCCTTAATCTTATCTATCCTAATTTTAGCCCTAATACCTTTCCTTCATACCTCAAAGCAACGAAGCCTAATATTCC	mmu|mt-lncRNA|CytB|H|14978|119	mmu|mt-lncRNA|CytB|H|14978	119	mt-lncRNA	protein_coding	H	sense	CytB	seq start site inside gene	14978	15096	14145	15288		599	403.0	194.0	2.0
CGCCATTCTACGCTCAATCCCCAATAAACTAGGAGGTGTCCTAGCCTTAATCTTATCTATCCTAATTTTAGCCCTAATACCTTTCCTTCATACCTCAAAGCAACGAAGCCTAATATTCCGC	mmu|mt-lncRNA|CytB|H|14978|121	mmu|mt-lncRNA|CytB|H|14978	121	mt-lncRNA	protein_coding	H	sense	CytB	seq start site inside gene	14978	15098	14145	15288		323	202.0	120.0	1.0
CGGAAATCTAGCCCATGCAGGAGCATCAGTAGACCTAACAATTTTCTCCCTTCATTTAGCTGGAGTGTCATCTATTTTAGGTGCAATTAATTTTATTACCACTATTATCA	mmu|mt-lncRNA|COI|H|5726|110	mmu|mt-lncRNA|COI|H|5726	110	mt-lncRNA	protein_coding	H	sense	COI	seq start site inside gene	5726	5835	5328	6872		290	176.0	114.0	0.0
CGGAATATTAGGCTTCGTTGCTTTGAGGTATGAAGGAAAGGTATTAGGGCTAAAATTAGGATAGATAAGATTAAGGCTAGGACACCTCCTAGTTTATTGGGGATTGAGCGTAGAATGGCG	mmu|mt-lncRNA|CytB|L|14978|120	mmu|mt-lncRNA|CytB|L|14978	120	mt-lncRNA	protein_coding	L	anti-sense	CytB	seq start site inside gene	14978	15097	14145	15288		247	168.0	79.0	0.0
CGGACTGCTAATGCCATTGGTTGAATAAATAGGCTAATTGTTTCAATAATAATAAGTATTGGAATTAGTGAAATTGGAGTTCCTTGTGGAAGGAAG	mmu|mt-lncRNA|ATP6|L|8307|96	mmu|mt-lncRNA|ATP6|L|8307	96	mt-lncRNA	protein_coding	L	anti-sense	ATP6	seq start site inside gene	8307	8402	7927	8607		224	126.0	98.0	0.0
CGGACTGCTAATGCCATTGGTTGAATAAATAGGCTAATTGTTTCAATAATAATAAGTATTGGAATTAGTGAAATTGGAGTTCCTTGTGGAAGGAAGTGGGCAAGTGAGCTTTTT	mmu|mt-lncRNA|ATP6|L|8289|114	mmu|mt-lncRNA|ATP6|L|8289	114	mt-lncRNA	protein_coding	L	anti-sense	ATP6	seq start site inside gene	8289	8402	7927	8607		300	172.0	128.0	0.0
CGGACTGCTAATGCCATTGGTTGAATAAATAGGCTAATTGTTTCAATAATAATAAGTATTGGAATTAGTGAAATTGGAGTTCCTTGTGGAAGGAAGTGGGCAAGTGAGCTTTTTAGTTTGTG	mmu|mt-lncRNA|ATP6|L|8281|122	mmu|mt-lncRNA|ATP6|L|8281	122	mt-lncRNA	protein_coding	L	anti-sense	ATP6	seq start site inside gene	8281	8402	7927	8607		241	144.0	96.0	1.0
CGGACTGCTAATGCCATTGGTTGAATAAATAGGCTAATTGTTTCAATAATAATAAGTATTGGAATTAGTGAAATTGGAGTTCCTTGTGGAAGGAAGTGGGCAAGTGAGCTTTTTAGTTTGTGTCGG	mmu|mt-lncRNA|ATP6|L|8277|126	mmu|mt-lncRNA|ATP6|L|8277	126	mt-lncRNA	protein_coding	L	anti-sense	ATP6	seq start site inside gene	8277	8402	7927	8607		207	119.0	88.0	0.0
CGGCAAACTAACCAACCATATAATTAACCTCCAACCCTCACACACACGAGAACTAACACTAATAGCCCTTCACATAATTCCACTTATTCTTCTAACTACCAGTCCAAA	mmu|mt-lncRNA|ND4|H|11414|108	mmu|mt-lncRNA|ND4|H|11414	108	mt-lncRNA	protein_coding	H	sense	ND4	seq start site inside gene	11414	11521	10167	11544		232	147.0	85.0	0.0
CGGCAAACTAACCAACCATATAATTAACCTCCAACCCTCACACACACGAGAACTAACACTAATAGCCCTTCACATAATTCCACTTATTCTTCTAACTACCAGTCCAAAAC	mmu|mt-lncRNA|ND4|H|11414|110	mmu|mt-lncRNA|ND4|H|11414	110	mt-lncRNA	protein_coding	H	sense	ND4	seq start site inside gene	11414	11523	10167	11544		278	186.0	92.0	0.0
CGTCTCCATTCTTTCCAACACTGACTAGTTAAACTTATTATCAAACAAATAATGCTAATCCACACACCAAAAGGACGAACATGAACCCTAATAATTGTTTCCCTAATCATATTTATTGGATCAACA	mmu|mt-lncRNA|ATP6|H|8047|126	mmu|mt-lncRNA|ATP6|H|8047	126	mt-lncRNA	protein_coding	H	sense	ATP6	seq start site inside gene	8047	8172	7927	8607		220	148.0	71.0	1.0
CTAAAATTAGGATAGATAAGATTAAGGCTAGGACACCTCCTAGTTTATTGGGGATTGAGCGTAGAATGGCGTATGCAAATAGGAAATATCATTCGGGTTTAATATGGGGTGGGG	mmu|mt-lncRNA|CytB|L|14935|114	mmu|mt-lncRNA|CytB|L|14935	114	mt-lncRNA	protein_coding	L	anti-sense	CytB	seq start site inside gene	14935	15048	14145	15288		234	150.0	84.0	0.0
CTAATATTCATCCTATGTGGGCAATTGATGAATAGGCTATAATTTTTCGTATTTGTGTTTGGTTAAGTCCTCCTCATGCCCCTATGAAAATAGAAGTAATTGCTAGTATTAAAATGATAGTAGAGTTGAG	mmu|mt-lncRNA|ND2|L|4358|130	mmu|mt-lncRNA|ND2|L|4358	130	mt-lncRNA	protein_coding	L	anti-sense	ND2	seq start site inside gene	4358	4487	3914	4951		201	136.0	65.0	0.0
CTAATATTTATTAATACTAGAGTAGCTCCTCCGATTAGGTGTATTAATAAGTGTCCTGCAGTAATGTTAGCTGTAAGCCGGACTGCTAATGCCATTGGTTGAATAAATAGGCTAATTGTTT	mmu|mt-lncRNA|ATP6|L|8360|121	mmu|mt-lncRNA|ATP6|L|8360	121	mt-lncRNA	protein_coding	L	anti-sense	ATP6	seq start site inside gene	8360	8480	7927	8607		302	191.0	111.0	0.0
CTAGGATTCAGTACAAAATTTGTGTGATTGGGCGGAATATTAGGCTTCGTTGCTTTGAGGTATGAAGGAAAGGTATTAGGGCTAAAATTAGGATAGATAAGATTAAGG	mmu|mt-lncRNA|CytB|L|15022|108	mmu|mt-lncRNA|CytB|L|15022	108	mt-lncRNA	protein_coding	L	anti-sense	CytB	seq start site inside gene	15022	15129	14145	15288		208	133.0	73.0	2.0
CTATTATCTTCCTAGGACCCCTATACTATATCAATTTACCAGAACTCTACTCAACTAACTTCATAATAGAAGCTCTACTACTATCATCAACATTCCTATGGATCCGAG	mmu|mt-lncRNA|ND1|H|3466|108	mmu|mt-lncRNA|ND1|H|3466	108	mt-lncRNA	protein_coding	H	sense	ND1	seq start site inside gene	3466	3573	2751	3707		407	262.0	145.0	0.0
CTCAATCTCACTTCTATGAAATAAAACTCCAGCAATACTAACTATAATCTCACTGATATTACTATCCCTAGGAGGCCTTCCACCACTAACAGGATTCTTACCAAAATGAATTATCATCACAGAACTTATAAAAAAC	mmu|mt-lncRNA|ND2|H|4597|136	mmu|mt-lncRNA|ND2|H|4597	136	mt-lncRNA	protein_coding	H	sense	ND2	seq start site inside gene	4597	4732	3914	4951		363	238.0	125.0	0.0
CTCAGATGCAGATAAAATTCCATTTCACCCCTACTATACAATCAAAGATATCCTAGGTATCCTAATCATATTCTTAATTCTCATAACCCTAGTATTATTTTTCCCAGACATACTAGGAGACCCA	mmu|mt-lncRNA|CytB|H|14780|124	mmu|mt-lncRNA|CytB|H|14780	124	mt-lncRNA	protein_coding	H	sense	CytB	seq start site inside gene	14780	14903	14145	15288		352	241.0	111.0	0.0
CTCAGATGCAGATAAAATTCCATTTCACCCCTACTATACAATCAAAGATATCCTAGGTATCCTAATCATATTCTTAATTCTCATAACCCTAGTATTATTTTTCCCAGACATACTAGGAGACCCAGA	mmu|mt-lncRNA|CytB|H|14780|126	mmu|mt-lncRNA|CytB|H|14780	126	mt-lncRNA	protein_coding	H	sense	CytB	seq start site inside gene	14780	14905	14145	15288		225	134.0	91.0	0.0
CTCAGATGCAGATAAAATTCCATTTCACCCCTACTATACAATCAAAGATATCCTAGGTATCCTAATCATATTCTTAATTCTCATAACCCTAGTATTATTTTTCCCAGACATACTAGGAGACCCAGACAACTACATACCAG	mmu|mt-lncRNA|CytB|H|14780|140	mmu|mt-lncRNA|CytB|H|14780	140	mt-lncRNA	protein_coding	H	sense	CytB	seq start site inside gene	14780	14919	14145	15288		469	336.0	131.0	2.0
CTCCGATTAGGTGTATTAATAAGTGTCCTGCAGTAATGTTAGCTGTAAGCCGGACTGCTAATGCCATTGGTTGAATAAATAGGCTAATTGTTT	mmu|mt-lncRNA|ATP6|L|8360|93	mmu|mt-lncRNA|ATP6|L|8360	93	mt-lncRNA	protein_coding	L	anti-sense	ATP6	seq start site inside gene	8360	8452	7927	8607		236	119.0	116.0	1.0
CTCCGATTAGGTGTATTAATAAGTGTCCTGCAGTAATGTTAGCTGTAAGCCGGACTGCTAATGCCATTGGTTGAATAAATAGGCTAATTGTTTCAATAATAATAAGTATTGGAATTAGTGAAATTGGA	mmu|mt-lncRNA|ATP6|L|8325|128	mmu|mt-lncRNA|ATP6|L|8325	128	mt-lncRNA	protein_coding	L	anti-sense	ATP6	seq start site inside gene	8325	8452	7927	8607		204	131.0	73.0	0.0
CTCGAATGTGTGATATGGTGGAGGGCAGCCATGAAGTCATTCTAAATTTGTTGAAGCATACGATACTGATATTACTTCTCGTTTTGAAGCAAAG	mmu|mt-lncRNA|COI|L|6752|94	mmu|mt-lncRNA|COI|L|6752	94	mt-lncRNA	protein_coding	L	anti-sense	COI	seq start site inside gene	6752	6845	5328	6872		311	187.0	124.0	0.0
CTCGGATCCATAGGAATGTTGATGATAGTAGTAGAGCTTCTATTATGAAGTTAGTTGAGTAGAGTTCTGGTAAATTGATATAGTATAGGGGTCCTAGGAAGATAATAG	mmu|mt-lncRNA|ND1|L|3466|108	mmu|mt-lncRNA|ND1|L|3466	108	mt-lncRNA	protein_coding	L	anti-sense	ND1	seq start site inside gene	3466	3573	2751	3707		357	232.0	125.0	0.0
CTCGGATCCATAGGAATGTTGATGATAGTAGTAGAGCTTCTATTATGAAGTTAGTTGAGTAGAGTTCTGGTAAATTGATATAGTATAGGGGTCCTAGGAAGATAATAGTTG	mmu|mt-lncRNA|ND1|L|3463|111	mmu|mt-lncRNA|ND1|L|3463	111	mt-lncRNA	protein_coding	L	anti-sense	ND1	seq start site inside gene	3463	3573	2751	3707		202	121.0	80.0	1.0
CTCGTCCCCATTCTAATCGCCATAGCCTTCCTAACATTAGTAGAACGCAAAATCTTAGGGTACATACAACTACGAAAAGGCCCTAACATTGTTG	mmu|mt-lncRNA|ND1|H|2778|94	mmu|mt-lncRNA|ND1|H|2778	94	mt-lncRNA	protein_coding	H	sense	ND1	seq start site inside gene	2778	2871	2751	3707		280	177.0	103.0	0.0
CTGACCTCCAACAGGAATTTCACCACTTAACCCTCTAGAAGTCCCACTACTTAATACTTCAGTACTTCTAGCATCAGGTGTTTCAATTACATGAGCTCATCATAGCCTTATAGAAGGTAAACGAAAC	mmu|mt-lncRNA|COIII|H|8951|127	mmu|mt-lncRNA|COIII|H|8951	127	mt-lncRNA	protein_coding	H	sense	COIII	seq start site inside gene	8951	9077	8607	9390		208	113.0	95.0	0.0
CTGAGATTGGTATAAGAATTAAGATGATTGAGAAGTATGAGATGGAGGCTAGTTGGCCAATGATAATAAATGGGTGTTCTACTGGTTGGCCCCCAATTCAGG	mmu|mt-lncRNA|CytB|L|15151|102	mmu|mt-lncRNA|CytB|L|15151	102	mt-lncRNA	protein_coding	L	anti-sense	CytB	seq start site inside gene	15151	15252	14145	15288		201	134.0	67.0	0.0
CTGATGTGTAGTGTATGGCTAAGAAAAGACCTGTAATGATTTGGACTATTAGGCAGACTCCTAGAAGGGACCCAAAGTTTCATCATGATGAAATGTTG	mmu|mt-lncRNA|CytB|L|14219|98	mmu|mt-lncRNA|CytB|L|14219	98	mt-lncRNA	protein_coding	L	anti-sense	CytB	seq start site inside gene	14219	14316	14145	15288		206	117.0	89.0	0.0
CTGATGTGTAGTGTATGGCTAAGAAAAGACCTGTAATGATTTGGACTATTAGGCAGACTCCTAGAAGGGACCCAAAGTTTCATCATGATGAAATGTTGGATGGGGC	mmu|mt-lncRNA|CytB|L|14211|106	mmu|mt-lncRNA|CytB|L|14211	106	mt-lncRNA	protein_coding	L	anti-sense	CytB	seq start site inside gene	14211	14316	14145	15288		282	171.0	111.0	0.0
CTGATGTGTAGTGTATGGCTAAGAAAAGACCTGTAATGATTTGGACTATTAGGCAGACTCCTAGAAGGGACCCAAAGTTTCATCATGATGAAATGTTGGATGGGGCAGGTAGGTCAATG	mmu|mt-lncRNA|CytB|L|14198|119	mmu|mt-lncRNA|CytB|L|14198	119	mt-lncRNA	protein_coding	L	anti-sense	CytB	seq start site inside gene	14198	14316	14145	15288		229	139.0	89.0	1.0
CTGATGTGTAGTGTATGGCTAAGAAAAGACCTGTAATGATTTGGACTATTAGGCAGACTCCTAGAAGGGACCCAAAGTTTCATCATGATGAAATGTTGGATGGGGCAGGTAGGTCAATGAATG	mmu|mt-lncRNA|CytB|L|14194|123	mmu|mt-lncRNA|CytB|L|14194	123	mt-lncRNA	protein_coding	L	anti-sense	CytB	seq start site inside gene	14194	14316	14145	15288		224	154.0	70.0	0.0
CTGCAGTAATGTTAGCTGTAAGCCGGACTGCTAATGCCATTGGTTGAATAAATAGGCTAATTGTTTCAATAATAATAAGTATTGGAATTAGTGAAATTGGAGTTCCTTGTGGAAGGAAG	mmu|mt-lncRNA|ATP6|L|8307|119	mmu|mt-lncRNA|ATP6|L|8307	119	mt-lncRNA	protein_coding	L	anti-sense	ATP6	seq start site inside gene	8307	8425	7927	8607		200	125.0	74.0	1.0
CTGGCACCTTCACCAAAATCACTAACAACCATAAAAGTAAAAACCCCTTGAGAATTAAAATGAACGAAAATCTATTTGCCTCATTCATTACCCCAACAATAATAGGATTCCCA	mmu|mt-lncRNA|ATP8|H|7868|113	mmu|mt-lncRNA|ATP8|H|7868	113	mt-lncRNA	protein_coding	H	sense	ATP8	seq start site inside gene	7868	7980	7766	7969		469	291.0	174.0	4.0
CTGGGTCTCCTAGTATGTCTGGGAAAAATAATACTAGGGTTATGAGAATTAAGAATATGATTAGGATACCTAGGATATCTTTGATTGTATAGTAGGGGTGAAATGGAATTTTATCTGCATCTGAG	mmu|mt-lncRNA|CytB|L|14780|125	mmu|mt-lncRNA|CytB|L|14780	125	mt-lncRNA	protein_coding	L	anti-sense	CytB	seq start site inside gene	14780	14904	14145	15288		207	109.0	98.0	0.0
CTGGTATGTAGTTGTCTGGGTCTCCTAGTATGTCTGGGAAAAATAATACTAGGGTTATGAGAATTAAGAATATGATTAGGATACCTAGGATATCTTTG	mmu|mt-lncRNA|CytB|L|14822|98	mmu|mt-lncRNA|CytB|L|14822	98	mt-lncRNA	protein_coding	L	anti-sense	CytB	seq start site inside gene	14822	14919	14145	15288		276	186.0	90.0	0.0
CTGGTATGTAGTTGTCTGGGTCTCCTAGTATGTCTGGGAAAAATAATACTAGGGTTATGAGAATTAAGAATATGATTAGGATACCTAGGATATCTTTGATTGTATAGTAGGGGTGAAATGGAATTTTATCTGCATCTGAG	mmu|mt-lncRNA|CytB|L|14780|140	mmu|mt-lncRNA|CytB|L|14780	140	mt-lncRNA	protein_coding	L	anti-sense	CytB	seq start site inside gene	14780	14919	14145	15288		543	388.0	154.0	1.0
CTTAGATTTATGGATAGTTGGGTAGTAGGTGTAAATGTATGTGGTAAAAGGCCTAGGAGATTTGTTGATCCAATAAATATGATTAGGGAAACAATTATTAGGGTTCATGTTCG	mmu|mt-lncRNA|ATP6|L|8122|113	mmu|mt-lncRNA|ATP6|L|8122	113	mt-lncRNA	protein_coding	L	anti-sense	ATP6	seq start site inside gene	8122	8234	7927	8607		723	429.0	291.0	3.0
CTTCAATCCTATTCCCATCCTCAAAACGCCTAATCAACAACCGTCTCCATTCTTTCCAACACTGACTAGTTAAACTTATTATCAAAC	mmu|mt-lncRNA|ATP6|H|8006|87	mmu|mt-lncRNA|ATP6|H|8006	87	mt-lncRNA	protein_coding	H	sense	ATP6	seq start site inside gene	8006	8092	7927	8607		268	144.0	124.0	0.0
CTTCAATCCTATTCCCATCCTCAAAACGCCTAATCAACAACCGTCTCCATTCTTTCCAACACTGACTAGTTAAACTTATTATCAAACAAATAATGCTAATCCACACACCAAAA	mmu|mt-lncRNA|ATP6|H|8006|113	mmu|mt-lncRNA|ATP6|H|8006	113	mt-lncRNA	protein_coding	H	sense	ATP6	seq start site inside gene	8006	8118	7927	8607		804	494.0	303.0	7.0
CTTCAATCCTATTCCCATCCTCAAAACGCCTAATCAACAACCGTCTCCATTCTTTCCAACACTGACTAGTTAAACTTATTATCAAACAAATAATGCTAATCCACACACCAAAAG	mmu|mt-lncRNA|ATP6|H|8006|114	mmu|mt-lncRNA|ATP6|H|8006	114	mt-lncRNA	protein_coding	H	sense	ATP6	seq start site inside gene	8006	8119	7927	8607		642	395.0	246.0	1.0
CTTCAATCCTATTCCCATCCTCAAAACGCCTAATCAACAACCGTCTCCATTCTTTCCAACACTGACTAGTTAAACTTATTATCAAACAAATAATGCTAATCCACACACCAAAAGGAC	mmu|mt-lncRNA|ATP6|H|8006|117	mmu|mt-lncRNA|ATP6|H|8006	117	mt-lncRNA	protein_coding	H	sense	ATP6	seq start site inside gene	8006	8122	7927	8607		362	216.0	146.0	0.0
CTTCAATCCTATTCCCATCCTCAAAACGCCTAATCAACAACCGTCTCCATTCTTTCCAACACTGACTAGTTAAACTTATTATCAAACAAATAATGCTAATCCACACACCAAAAGGACGAACATGAA	mmu|mt-lncRNA|ATP6|H|8006|126	mmu|mt-lncRNA|ATP6|H|8006	126	mt-lncRNA	protein_coding	H	sense	ATP6	seq start site inside gene	8006	8131	7927	8607		220	143.0	76.0	1.0
CTTCAATCCTATTCCCATCCTCAAAACGCCTAATCAACAACCGTCTCCATTCTTTCCAACACTGACTAGTTAAACTTATTATCAAACAAATAATGCTAATCCACACACCAAAAGGACGAACATGAAC	mmu|mt-lncRNA|ATP6|H|8006|127	mmu|mt-lncRNA|ATP6|H|8006	127	mt-lncRNA	protein_coding	H	sense	ATP6	seq start site inside gene	8006	8132	7927	8607		236	125.0	108.0	3.0
CTTCAATCCTATTCCCATCCTCAAAACGCCTAATCAACAACCGTCTCCATTCTTTCCAACACTGACTAGTTAAACTTATTATCAAACAAATAATGCTAATCCACACACCAAAAGGACGAACATGAACCCTAATAATTG	mmu|mt-lncRNA|ATP6|H|8006|138	mmu|mt-lncRNA|ATP6|H|8006	138	mt-lncRNA	protein_coding	H	sense	ATP6	seq start site inside gene	8006	8143	7927	8607		265	181.0	83.0	1.0
CTTCACCAAAATCACTAACAACCATAAAAGTAAAAACCCCTTGAGAATTAAAATGAACGAAAATCTATTTGCCTCATTCATTACCCCAACAATAATAGGATTCCCA	mmu|mt-lncRNA|ATP8|H|7875|106	mmu|mt-lncRNA|ATP8|H|7875	106	mt-lncRNA	protein_coding	H	sense	ATP8	seq start site inside gene	7875	7980	7766	7969		210	115.0	94.0	1.0
CTTCATTAATATTTTATTATCCCTAACGCTAATTCTAGTTGCATTCTGACTCCCCCAAATAAATCTGTACTCAGAAAAAGCAAATCCATATGAATGCGGATTCGAC	mmu|mt-lncRNA|ND3|H|9479|106	mmu|mt-lncRNA|ND3|H|9479	106	mt-lncRNA	protein_coding	H	sense	ND3	seq start site inside gene	9479	9584	9459	9806		227	118.0	109.0	0.0
CTTCCTTCCACAAGGAACTCCAATTTCACTAATTCCAATACTTATTATTATTGAAACAATTAGCCTATTTATTCAACCAATGGCATTAGCAGTCCG	mmu|mt-lncRNA|ATP6|H|8307|96	mmu|mt-lncRNA|ATP6|H|8307	96	mt-lncRNA	protein_coding	H	sense	ATP6	seq start site inside gene	8307	8402	7927	8607		215	111.0	103.0	1.0
CTTGAAACCAATTTTAGGGGGTTCGATTCCTTCCTTTCTTATTTTACTTTTACATAGGTTGGTTCCTCGAATGTGTGATATGGTGGAGGGCAG	mmu|mt-lncRNA|COI|L|6818|93	mmu|mt-lncRNA|COI|L|6818	93	mt-lncRNA	protein_coding	L	anti-sense	COI	seq start site inside gene	6818	6910	5328	6872		209	117.0	92.0	0.0
CTTGACCCGATTCTTCGCTTTCCACTTCATCTTACCATTTATTATCGCGGCCCTAGCAATCGTTCACCTCCTCTTCCTCCACGAAACAGGATCAAACAACCCAACAGGATTAAAC	mmu|mt-lncRNA|CytB|H|14666|115	mmu|mt-lncRNA|CytB|H|14666	115	mt-lncRNA	protein_coding	H	sense	CytB	seq start site inside gene	14666	14780	14145	15288		274	149.0	120.0	5.0
CTTGTATGTGTTAGTTTTGTTGTTAATATTAGCGAGATGATATAGAGGACTAAGGAGCTAATTAGGAAAACAATTATTAGTGTGTGATCATGGAAATTTATTAGCTCTTCTATAATAGGGGATGTGGC	mmu|mt-lncRNA|COII|L|7046|128	mmu|mt-lncRNA|COII|L|7046	128	mt-lncRNA	protein_coding	L	anti-sense	COII	seq start site inside gene	7046	7173	7013	7696		237	141.0	96.0	0.0
CTTTACTTCACCATCCTCCAAGCTTCAGAATACTTTGAAACATCATTCTCCATTTCAGATGGTATCTATGGTTCTACATTCTTCATGGCTACTGGATTCCATGGACTCCATGTAATTATTGGATCAACA	mmu|mt-lncRNA|COIII|H|9117|129	mmu|mt-lncRNA|COIII|H|9117	129	mt-lncRNA	protein_coding	H	sense	COIII	seq start site inside gene	9117	9245	8607	9390		227	152.0	75.0	0.0
CTTTGAGGTATGAAGGAAAGGTATTAGGGCTAAAATTAGGATAGATAAGATTAAGGCTAGGACACCTCCTAGTTTATTGGGGATTGAGCGTAGAATGGCG	mmu|mt-lncRNA|CytB|L|14978|100	mmu|mt-lncRNA|CytB|L|14978	100	mt-lncRNA	protein_coding	L	anti-sense	CytB	seq start site inside gene	14978	15077	14145	15288		316	197.0	118.0	1.0
CTTTGCTTCAAAACGAGAAGTAATATCAGTATCGTATGCTTCAACAAATTTAGAATGACTTCATGGCTGCCCTCCACCATATCACACATTCGAG	mmu|mt-lncRNA|COI|H|6752|94	mmu|mt-lncRNA|COI|H|6752	94	mt-lncRNA	protein_coding	H	sense	COI	seq start site inside gene	6752	6845	5328	6872		249	143.0	106.0	0.0
CTTTTGGTGTGTGGATTAGCATTATTTGTTTGATAATAAGTTTAACTAGTCAGTGTTGGAAAGAATGGAGACGGTTGTTGATTAGGCGTTTTGAGGATGGGAATAGGATTGAAG	mmu|mt-lncRNA|ATP6|L|8006|114	mmu|mt-lncRNA|ATP6|L|8006	114	mt-lncRNA	protein_coding	L	anti-sense	ATP6	seq start site inside gene	8006	8119	7927	8607		726	449.0	274.0	3.0
GAAAAATAATACTAGGGTTATGAGAATTAAGAATATGATTAGGATACCTAGGATATCTTTGATTGTATAGTAGGGGTGAAATGGAATTTTATCTGCATCTGAG	mmu|mt-lncRNA|CytB|L|14780|103	mmu|mt-lncRNA|CytB|L|14780	103	mt-lncRNA	protein_coding	L	anti-sense	CytB	seq start site inside gene	14780	14882	14145	15288		207	125.0	82.0	0.0
GAAAATTATAAAAACTTTTCAAATATATTCTCCTCAGACCCCCTATCCACACCATTAATTATTTTAACAGCCTGATTACTGCCACTAATATTAATAGCTAGCCAAAACCACCTAAAAAAAG	mmu|mt-lncRNA|ND4|H|10305|121	mmu|mt-lncRNA|ND4|H|10305	121	mt-lncRNA	protein_coding	H	sense	ND4	seq start site inside gene	10305	10425	10167	11544		208	148.0	60.0	0.0
GAAATATTCATGTTCCTAGTTGTTTATAGTTGAGTACGATGGCCAGGAGGATAATTATTGAGGCTGTTGCTTGTGTGACGAAGTATTTTGTTGCTGCTTCAGTTGATCGTGGGTTTTTT	mmu|mt-lncRNA|ND2|L|4054|119	mmu|mt-lncRNA|ND2|L|4054	119	mt-lncRNA	protein_coding	L	anti-sense	ND2	seq start site inside gene	4054	4172	3914	4951		217	130.0	87.0	0.0
GCAAACTCCAACTACGAACGGATCCACAGCCGTACTATAATCATGGCCCGAGGACTTCAAATGGTCTTCCCACTTATAGCCACATGATGACTGATAGCAAGTCTAGCTAATCTAGC	mmu|mt-lncRNA|ND4|H|11154|116	mmu|mt-lncRNA|ND4|H|11154	116	mt-lncRNA	protein_coding	H	sense	ND4	seq start site inside gene	11154	11269	10167	11544		213	116.0	97.0	0.0
GCAAATTCTAGAATTGTGAGTAGAAGTAAAATAATAAATGTAATGGTAGCTGTTGGTGGGCTAATATTTATTAATACTAGAGTAGCTCCTCCGATTAGGTGTATTAATAAGTGTCCTGCAGTAATGTTAGCTGTAAGCCGG	mmu|mt-lncRNA|ATP6|L|8400|141	mmu|mt-lncRNA|ATP6|L|8400	141	mt-lncRNA	protein_coding	L	anti-sense	ATP6	seq start site inside gene	8400	8540	7927	8607		346	224.0	121.0	1.0
GCAAGGTGTCTTAAGCTATTTTAATGTGCTTGATACCCTCTCCTTAAATTTTAAGTAAATGTTTAAGGGATTTTACACCGGTCTATGGAGGTTTGCATGTGTAATTTTACCTCTAATTAATTATAAGGCCA	mmu|mt-lncRNA|mtSSU rRNA|L|83|131	mmu|mt-lncRNA|mtSSU rRNA|L|83	131	mt-lncRNA	Mt_rRNA	L	anti-sense	mtSSU rRNA	seq start site inside gene	83	213	70	1024		228	0.0	0.0	228.0
GCCCCATCCAACATTTCATCATGATGAAACTTTGGGTCCCTTCTAGGAGTCTGCCTAATAGTCCAAATCATTACAGGTCTTTTCTTAGCCATACACTACACATCAG	mmu|mt-lncRNA|CytB|H|14211|106	mmu|mt-lncRNA|CytB|H|14211	106	mt-lncRNA	protein_coding	H	sense	CytB	seq start site inside gene	14211	14316	14145	15288		288	160.0	128.0	0.0
GCCTAATCAACAACCGTCTCCATTCTTTCCAACACTGACTAGTTAAACTTATTATCAAACAAATAATGCTAATCCACACACCAAAAGGACGAACATGAACCCTAATAATTGTTTCCCTAATCATATTTATTGGATCAACA	mmu|mt-lncRNA|ATP6|H|8033|140	mmu|mt-lncRNA|ATP6|H|8033	140	mt-lncRNA	protein_coding	H	sense	ATP6	seq start site inside gene	8033	8172	7927	8607		261	177.0	81.0	3.0
GCGGAATATTAGGCTTCGTTGCTTTGAGGTATGAAGGAAAGGTATTAGGGCTAAAATTAGGATAGATAAGATTAAGGCTAGGACACCTCCTAGTTTATTGGGGATTGAGCGTAGAATGGCG	mmu|mt-lncRNA|CytB|L|14978|121	mmu|mt-lncRNA|CytB|L|14978	121	mt-lncRNA	protein_coding	L	anti-sense	CytB	seq start site inside gene	14978	15098	14145	15288		590	369.0	217.0	4.0
GCGGAATATTAGGCTTCGTTGCTTTGAGGTATGAAGGAAAGGTATTAGGGCTAAAATTAGGATAGATAAGATTAAGGCTAGGACACCTCCTAGTTTATTGGGGATTGAGCGTAGAATGGCGTATGCAAA	mmu|mt-lncRNA|CytB|L|14970|129	mmu|mt-lncRNA|CytB|L|14970	129	mt-lncRNA	protein_coding	L	anti-sense	CytB	seq start site inside gene	14970	15098	14145	15288		203	131.0	71.0	1.0
GGAAAATATTAGGTTGGGTTTAGTTTTTGTTTGGTGAGTTATTATTTTTGAGTTATTGTTGGTTGGAAATATTGTTAGTGAAGTGGAATAAATTAGGCGAGTATAAAAG	mmu|mt-lncRNA|ND2|L|4786|109	mmu|mt-lncRNA|ND2|L|4786	109	mt-lncRNA	protein_coding	L	anti-sense	ND2	seq start site inside gene	4786	4894	3914	4951		228	111.0	117.0	0.0
GGAATATTAGGCTTCGTTGCTTTGAGGTATGAAGGAAAGGTATTAGGGCTAAAATTAGGATAGATAAGATTAAGGCTAGGACACCTCCTAGTTTATTGGGGATTGAGCGTAGAATGGCG	mmu|mt-lncRNA|CytB|L|14978|119	mmu|mt-lncRNA|CytB|L|14978	119	mt-lncRNA	protein_coding	L	anti-sense	CytB	seq start site inside gene	14978	15096	14145	15288		904	621.0	281.0	2.0
GGAATATTAGGCTTCGTTGCTTTGAGGTATGAAGGAAAGGTATTAGGGCTAAAATTAGGATAGATAAGATTAAGGCTAGGACACCTCCTAGTTTATTGGGGATTGAGCGTAGAATGGCGTATGCAAA	mmu|mt-lncRNA|CytB|L|14970|127	mmu|mt-lncRNA|CytB|L|14970	127	mt-lncRNA	protein_coding	L	anti-sense	CytB	seq start site inside gene	14970	15096	14145	15288		262	170.0	91.0	1.0
GGATAGTTGGGTAGTAGGTGTAAATGTATGTGGTAAAAGGCCTAGGAGATTTGTTGATCCAATAAATATGATTAGGGAAACAATTATTAGGGTTCATGTTCG	mmu|mt-lncRNA|ATP6|L|8122|102	mmu|mt-lncRNA|ATP6|L|8122	102	mt-lncRNA	protein_coding	L	anti-sense	ATP6	seq start site inside gene	8122	8223	7927	8607		342	183.0	159.0	0.0
GGCACCTTCACCAAAATCACTAACAACCATAAAAGTAAAAACCCCTTGAGAATTAAAATGAACGAAAATCTATTTGCCTCATTCATTACCCCAACAATAATAGGATTCCCA	mmu|mt-lncRNA|ATP8|H|7870|111	mmu|mt-lncRNA|ATP8|H|7870	111	mt-lncRNA	protein_coding	H	sense	ATP8	seq start site inside gene	7870	7980	7766	7969		235	76.0	159.0	0.0
GGCGTATGCAAATAGGAAATATCATTCGGGTTTAATATGGGGTGGGGTGTTTAGTGGATTAGCTGGTATGTAGTTGTCTGGGTCTCCTAGTATGTCTGGG	mmu|mt-lncRNA|CytB|L|14882|100	mmu|mt-lncRNA|CytB|L|14882	100	mt-lncRNA	protein_coding	L	anti-sense	CytB	seq start site inside gene	14882	14981	14145	15288		243	150.0	93.0	0.0
GGCGTTTTGAGGATGGGAATAGGATTGAAGGAAATATAATGATGGCTACAACGATTGGGAATCCTATTATTGTTGGGGTAATGAATGAGGCAAATAGATTTTCG	mmu|mt-lncRNA|ATP8|L|7932|104	mmu|mt-lncRNA|ATP8|L|7932	104	mt-lncRNA	protein_coding	L	anti-sense	ATP8	seq start site inside gene	7932	8035	7766	7969		1906	1103.0	802.0	1.0
GGCGTTTTGAGGATGGGAATAGGATTGAAGGAAATATAATGATGGCTACAACGATTGGGAATCCTATTATTGTTGGGGTAATGAATGAGGCAAATAGATTTTCGTTCATTTTAAT	mmu|mt-lncRNA|ATP8|L|7921|115	mmu|mt-lncRNA|ATP8|L|7921	115	mt-lncRNA	protein_coding	L	anti-sense	ATP8	seq start site inside gene	7921	8035	7766	7969		265	99.0	166.0	0.0
GGCGTTTTGAGGATGGGAATAGGATTGAAGGAAATATAATGATGGCTACAACGATTGGGAATCCTATTATTGTTGGGGTAATGAATGAGGCAAATAGATTTTCGTTCATTTTAATTCTCAAGGGGTTTTTAC	mmu|mt-lncRNA|ATP8|L|7904|132	mmu|mt-lncRNA|ATP8|L|7904	132	mt-lncRNA	protein_coding	L	anti-sense	ATP8	seq start site inside gene	7904	8035	7766	7969		202	109.0	92.0	1.0
GTCCTTTTGGTGTGTGGATTAGCATTATTTGTTTGATAATAAGTTTAACTAGTCAGTGTTGGAAAGAATGGAGACGGTTGTTGATTAGGCGTTTTGAGGATGGGAATAGGATTGAAG	mmu|mt-lncRNA|ATP6|L|8006|117	mmu|mt-lncRNA|ATP6|L|8006	117	mt-lncRNA	protein_coding	L	anti-sense	ATP6	seq start site inside gene	8006	8122	7927	8607		428	249.0	179.0	0.0
GTCGAATCCGCATTCATATGGATTTGCTTTTTCTGAGTACAGATTTATTTGGGGGAGTCAGAATGCAACTAGAATTAGCGTTAGGGATAATAAAA	mmu|mt-lncRNA|ND3|L|9490|95	mmu|mt-lncRNA|ND3|L|9490	95	mt-lncRNA	protein_coding	L	anti-sense	ND3	seq start site inside gene	9490	9584	9459	9806		276	142.0	134.0	0.0
GTCGAATCCGCATTCATATGGATTTGCTTTTTCTGAGTACAGATTTATTTGGGGGAGTCAGAATGCAACTAGAATTAGCGTTAGGGATAATAAAAT	mmu|mt-lncRNA|ND3|L|9489|96	mmu|mt-lncRNA|ND3|L|9489	96	mt-lncRNA	protein_coding	L	anti-sense	ND3	seq start site inside gene	9489	9584	9459	9806		266	150.0	116.0	0.0
GTCGAATCCGCATTCATATGGATTTGCTTTTTCTGAGTACAGATTTATTTGGGGGAGTCAGAATGCAACTAGAATTAGCGTTAGGGATAATAAAATATTAATGAAG	mmu|mt-lncRNA|ND3|L|9479|106	mmu|mt-lncRNA|ND3|L|9479	106	mt-lncRNA	protein_coding	L	anti-sense	ND3	seq start site inside gene	9479	9584	9459	9806		257	134.0	123.0	0.0
GTGAAATTGGAGTTCCTTGTGGAAGGAAGTGGGCAAGTGAGCTTTTTAGTTTGTGTCGGAAGCCTGTAATTACGGCTCCAGCTCATAGTGGAATGGCTATACTTAGATTTATG	mmu|mt-lncRNA|ATP6|L|8223|113	mmu|mt-lncRNA|ATP6|L|8223	113	mt-lncRNA	protein_coding	L	anti-sense	ATP6	seq start site inside gene	8223	8335	7927	8607		424	243.0	181.0	0.0
GTGAAATTGGAGTTCCTTGTGGAAGGAAGTGGGCAAGTGAGCTTTTTAGTTTGTGTCGGAAGCCTGTAATTACGGCTCCAGCTCATAGTGGAATGGCTATACTTAGATTTATGGATAGTTG	mmu|mt-lncRNA|ATP6|L|8215|121	mmu|mt-lncRNA|ATP6|L|8215	121	mt-lncRNA	protein_coding	L	anti-sense	ATP6	seq start site inside gene	8215	8335	7927	8607		426	238.0	188.0	0.0
GTGAAATTGGAGTTCCTTGTGGAAGGAAGTGGGCAAGTGAGCTTTTTAGTTTGTGTCGGAAGCCTGTAATTACGGCTCCAGCTCATAGTGGAATGGCTATACTTAGATTTATGGATAGTTGGGTAGTAG	mmu|mt-lncRNA|ATP6|L|8207|129	mmu|mt-lncRNA|ATP6|L|8207	129	mt-lncRNA	protein_coding	L	anti-sense	ATP6	seq start site inside gene	8207	8335	7927	8607		200	113.0	87.0	0.0
GTGAAATTGGAGTTCCTTGTGGAAGGAAGTGGGCAAGTGAGCTTTTTAGTTTGTGTCGGAAGCCTGTAATTACGGCTCCAGCTCATAGTGGAATGGCTATACTTAGATTTATGGATAGTTGGGTAGTAGGTGTAAA	mmu|mt-lncRNA|ATP6|L|8200|136	mmu|mt-lncRNA|ATP6|L|8200	136	mt-lncRNA	protein_coding	L	anti-sense	ATP6	seq start site inside gene	8200	8335	7927	8607		267	158.0	106.0	3.0
GTGATTTTAAATCTGTTTGGCGTAAGCAGATTGAGCTAGTTATAATTATTCCTCATAGGGAGAGAAGGATGAAGGGGTATGCTATATATTTTGTTAGTGGGTCTAGAATAATGGAGATGCG	mmu|mt-lncRNA|ND4|L|10899|121	mmu|mt-lncRNA|ND4|L|10899	121	mt-lncRNA	protein_coding	L	anti-sense	ND4	seq start site inside gene	10899	11019	10167	11544		249	175.0	74.0	0.0
GTGGATTAGCATTATTTGTTTGATAATAAGTTTAACTAGTCAGTGTTGGAAAGAATGGAGACGGTTGTTGATTAGGCGTTTTGAGGATGGGAATAGGATTGAAG	mmu|mt-lncRNA|ATP6|L|8006|104	mmu|mt-lncRNA|ATP6|L|8006	104	mt-lncRNA	protein_coding	L	anti-sense	ATP6	seq start site inside gene	8006	8109	7927	8607		237	116.0	120.0	1.0
GTTCATGTTCGTCCTTTTGGTGTGTGGATTAGCATTATTTGTTTGATAATAAGTTTAACTAGTCAGTGTTGGAAAGAATGGAGACGGTTGTTGATTAGGCGTTTTGAGGATGGGAATAGGATTGAAG	mmu|mt-lncRNA|ATP6|L|8006|127	mmu|mt-lncRNA|ATP6|L|8006	127	mt-lncRNA	protein_coding	L	anti-sense	ATP6	seq start site inside gene	8006	8132	7927	8607		264	163.0	100.0	1.0
GTTGATTAGGCGTTTTGAGGATGGGAATAGGATTGAAGGAAATATAATGATGGCTACAACGATTGGGAATCCTATTATTGTTGGGGTAATGAATGAGGCAAATAGATTTTCG	mmu|mt-lncRNA|ATP8|L|7932|112	mmu|mt-lncRNA|ATP8|L|7932	112	mt-lncRNA	protein_coding	L	anti-sense	ATP8	seq start site inside gene	7932	8043	7766	7969		527	278.0	249.0	0.0
GTTGGGTAGTAGGTGTAAATGTATGTGGTAAAAGGCCTAGGAGATTTGTTGATCCAATAAATATGATTAGGGAAACAATTATTAGGGTTCATGTTCG	mmu|mt-lncRNA|ATP6|L|8122|97	mmu|mt-lncRNA|ATP6|L|8122	97	mt-lncRNA	protein_coding	L	anti-sense	ATP6	seq start site inside gene	8122	8218	7927	8607		239	122.0	117.0	0.0
GTTTAATCCTGTTGGGTTGTTTGATCCTGTTTCGTGGAGGAAGAGGAGGTGAACGATTGCTAGGGCCGCGATAATAAATGGTAAGATGAAGTGGAAAGCGAAGAATCGGGTCAAG	mmu|mt-lncRNA|CytB|L|14666|115	mmu|mt-lncRNA|CytB|L|14666	115	mt-lncRNA	protein_coding	L	anti-sense	CytB	seq start site inside gene	14666	14780	14145	15288		201	107.0	87.0	7.0
GTTTAATCCTGTTGGGTTGTTTGATCCTGTTTCGTGGAGGAAGAGGAGGTGAACGATTGCTAGGGCCGCGATAATAAATGGTAAGATGAAGTGGAAAGCGAAGAATCGGGTCAAGGTGGC	mmu|mt-lncRNA|CytB|L|14661|120	mmu|mt-lncRNA|CytB|L|14661	120	mt-lncRNA	protein_coding	L	anti-sense	CytB	seq start site inside gene	14661	14780	14145	15288		214	127.0	86.0	1.0
GTTTGATAATAAGTTTAACTAGTCAGTGTTGGAAAGAATGGAGACGGTTGTTGATTAGGCGTTTTGAGGATGGGAATAGGATTGAAG	mmu|mt-lncRNA|ATP6|L|8006|87	mmu|mt-lncRNA|ATP6|L|8006	87	mt-lncRNA	protein_coding	L	anti-sense	ATP6	seq start site inside gene	8006	8092	7927	8607		309	156.0	153.0	0.0
GTTTGATGTTACTGTTGCTTGATTTAGTCGGCCTGGGATGGCATCAGTTTTAAGTCCTAGGGAGGGGACTGCTCATGAGTGGAGGACGTCTTCAGATGAAATTAATATACGGATTGGAA	mmu|mt-lncRNA|COII|L|7455|119	mmu|mt-lncRNA|COII|L|7455	119	mt-lncRNA	protein_coding	L	anti-sense	COII	seq start site inside gene	7455	7573	7013	7696		220	125.0	93.0	2.0
GTTTGTTTCTGCTAGGGTTGAGATAAATCATATTATGGCTATGGGTCAGGCTGGCAGAAGTAATCATATGTGTTCTTGGGTTGTAATAAGTGTTTGTAGAGAGTAGGATCCATTTATTAATAGAACTGATAAAAG	mmu|mt-lncRNA|ND1|L|3198|135	mmu|mt-lncRNA|ND1|L|3198	135	mt-lncRNA	protein_coding	L	anti-sense	ND1	seq start site inside gene	3198	3332	2751	3707		243	165.0	78.0	0.0
GTTTTATTTCATAGAAGTGAGATTGAGTTGATGGTTATAGAGTTATTTAGTATAAGTGCTATGAATATAGGGGCTGTAAGAATAATATAGATTATGAGGTTGAGTAGAGTGAGG	mmu|mt-lncRNA|ND2|L|4510|114	mmu|mt-lncRNA|ND2|L|4510	114	mt-lncRNA	protein_coding	L	anti-sense	ND2	seq start site inside gene	4510	4623	3914	4951		262	168.0	94.0	0.0
GTTTTGAGGATGGGAATAGGATTGAAGGAAATATAATGATGGCTACAACGATTGGGAATCCTATTATTGTTGGGGTAATGAATGAGGCAAATAGATTTTCG	mmu|mt-lncRNA|ATP8|L|7932|101	mmu|mt-lncRNA|ATP8|L|7932	101	mt-lncRNA	protein_coding	L	anti-sense	ATP8	seq start site inside gene	7932	8032	7766	7969		424	250.0	172.0	2.0
GTTTTGGACTGGTAGTTAGAAGAATAAGTGGAATTATGTGAAGGGCTATTAGTGTTAGTTCTCGTGTGTGTGAGGGTTGGAGGTTAATTATATGGTTGGTTAGTTTGCCG	mmu|mt-lncRNA|ND4|L|11414|110	mmu|mt-lncRNA|ND4|L|11414	110	mt-lncRNA	protein_coding	L	anti-sense	ND4	seq start site inside gene	11414	11523	10167	11544		278	191.0	87.0	0.0
GTTTTTTATAAGTTCTGTGATGATAATTCATTTTGGTAAGAATCCTGTTAGTGGTGGAAGGCCTCCTAGGGATAGTAATATCAGTGAGATTATAGTTAGTATTGCTGGAGTTTTATTTCATAGAAGTGAG	mmu|mt-lncRNA|ND2|L|4603|130	mmu|mt-lncRNA|ND2|L|4603	130	mt-lncRNA	protein_coding	L	anti-sense	ND2	seq start site inside gene	4603	4732	3914	4951		223	134.0	86.0	3.0
GTTTTTTATAAGTTCTGTGATGATAATTCATTTTGGTAAGAATCCTGTTAGTGGTGGAAGGCCTCCTAGGGATAGTAATATCAGTGAGATTATAGTTAGTATTGCTGGAGTTTTATTTCATAGAAGTGAGATTGAG	mmu|mt-lncRNA|ND2|L|4597|136	mmu|mt-lncRNA|ND2|L|4597	136	mt-lncRNA	protein_coding	L	anti-sense	ND2	seq start site inside gene	4597	4732	3914	4951		409	246.0	163.0	0.0
GTTTTTTCATAGAAGATGTATAAGTTGATCGTAACGGAAGCGTGGATAAGATGCTCGGATCCATAGGAATGTTGATGATAGTAGTAGAGCTTCTATTATGAAGTTAGTTGAGTAGAGTTCTG	mmu|mt-lncRNA|ND1|L|3505|122	mmu|mt-lncRNA|ND1|L|3505	122	mt-lncRNA	protein_coding	L	anti-sense	ND1	seq start site inside gene	3505	3626	2751	3707		575	395.0	179.0	1.0
GTTTTTTTAGGGCTTGATAGTCAGGTTAGTGGTAGTAGCATTAGTGAGGGAAGAATAATTTTTAGCATTGTAGTAGGTTGAGATTTTG	mmu|mt-lncRNA|ND4L|L|10147|88	mmu|mt-lncRNA|ND4L|L|10147	88	mt-lncRNA	protein_coding	L	anti-sense	ND4L	seq start site inside gene	10147	10234	9877	10173		266	171.0	95.0	0.0
GTTTTTTTAGGGCTTGATAGTCAGGTTAGTGGTAGTAGCATTAGTGAGGGAAGAATAATTTTTAGCATTGTAGTAGGTTGAGATTTTGGACGTAATCTGTTCCGTACGTGTTTG	mmu|mt-lncRNA|ND4L|L|10121|114	mmu|mt-lncRNA|ND4L|L|10121	114	mt-lncRNA	protein_coding	L	anti-sense	ND4L	seq start site inside gene	10121	10234	9877	10173		315	208.0	107.0	0.0
TAAAAGTGCACCTGGTTGACCTAATTCTGCTCGAATTAAAATACTTAGTGCAGTACCCACTATTCCCGCTCAGGCTCCGAATAGTAGATAGAGGGTTCCGATATCTTTG	mmu|mt-lncRNA|COI|L|5363|109	mmu|mt-lncRNA|COI|L|5363	109	mt-lncRNA	protein_coding	L	anti-sense	COI	seq start site inside gene	5363	5471	5328	6872		215	116.0	99.0	0.0
TCTGGGTCTCCTAGTATGTCTGGGAAAAATAATACTAGGGTTATGAGAATTAAGAATATGATTAGGATACCTAGGATATCTTTGATTGTATAGTAGGGGTGAAATGGAATTTTATCTGCATCTGAG	mmu|mt-lncRNA|CytB|L|14780|126	mmu|mt-lncRNA|CytB|L|14780	126	mt-lncRNA	protein_coding	L	anti-sense	CytB	seq start site inside gene	14780	14905	14145	15288		268	165.0	103.0	0.0
TGATAATAGTGGTAATAAAATTAATTGCACCTAAAATAGATGACACTCCAGCTAAATGAAGGGAGAAAATTGTTAGGTCTACTGATGCTCCTGCATGGGCTAGATTTCCG	mmu|mt-lncRNA|COI|L|5726|110	mmu|mt-lncRNA|COI|L|5726	110	mt-lncRNA	protein_coding	L	anti-sense	COI	seq start site inside gene	5726	5835	5328	6872		320	200.0	119.0	1.0
TGATAATTCATTTTGGTAAGAATCCTGTTAGTGGTGGAAGGCCTCCTAGGGATAGTAATATCAGTGAGATTATAGTTAGTATTGCTGGAGTTTTATTTCATAGAAGTGAGATTGAG	mmu|mt-lncRNA|ND2|L|4597|116	mmu|mt-lncRNA|ND2|L|4597	116	mt-lncRNA	protein_coding	L	anti-sense	ND2	seq start site inside gene	4597	4712	3914	4951		211	134.0	76.0	1.0
TGATTAGGCGTTTTGAGGATGGGAATAGGATTGAAGGAAATATAATGATGGCTACAACGATTGGGAATCCTATTATTGTTGGGGTAATGAATGAGGCAAATAGATTTTCG	mmu|mt-lncRNA|ATP8|L|7932|110	mmu|mt-lncRNA|ATP8|L|7932	110	mt-lncRNA	protein_coding	L	anti-sense	ATP8	seq start site inside gene	7932	8041	7766	7969		696	426.0	270.0	0.0
TGGCCTTATAATTAATTAGAGGTAAAATTACACATGCAAACCTCCATAGACCGGTGTAAAATCCCTTAAACATTTACTTAAAATTTAAGGAGAGGGTATCAAGCACATTAAAATAGCTTAAGACACCTTGC	mmu|mt-lncRNA|mtSSU rRNA|H|83|131	mmu|mt-lncRNA|mtSSU rRNA|H|83	131	mt-lncRNA	Mt_rRNA	H	sense	mtSSU rRNA	seq start site inside gene	83	213	70	1024		208	0.0	0.0	208.0
TGGGAATCCTATTATTGTTGGGGTAATGAATGAGGCAAATAGATTTTCGTTCATTTTAATTCTCAAGGGGTTTTTACTTTTATGGTTGTTAGTGATTTTGGTGAAG	mmu|mt-lncRNA|ATP8|L|7875|106	mmu|mt-lncRNA|ATP8|L|7875	106	mt-lncRNA	protein_coding	L	anti-sense	ATP8	seq start site inside gene	7875	7980	7766	7969		242	136.0	105.0	1.0
TGGGAATCCTATTATTGTTGGGGTAATGAATGAGGCAAATAGATTTTCGTTCATTTTAATTCTCAAGGGGTTTTTACTTTTATGGTTGTTAGTGATTTTGGTGAAGGTGCC	mmu|mt-lncRNA|ATP8|L|7870|111	mmu|mt-lncRNA|ATP8|L|7870	111	mt-lncRNA	protein_coding	L	anti-sense	ATP8	seq start site inside gene	7870	7980	7766	7969		209	61.0	148.0	0.0
TGGGAATCCTATTATTGTTGGGGTAATGAATGAGGCAAATAGATTTTCGTTCATTTTAATTCTCAAGGGGTTTTTACTTTTATGGTTGTTAGTGATTTTGGTGAAGGTGCCAG	mmu|mt-lncRNA|ATP8|L|7868|113	mmu|mt-lncRNA|ATP8|L|7868	113	mt-lncRNA	protein_coding	L	anti-sense	ATP8	seq start site inside gene	7868	7980	7766	7969		429	260.0	168.0	1.0
TGGGAATCCTATTATTGTTGGGGTAATGAATGAGGCAAATAGATTTTCGTTCATTTTAATTCTCAAGGGGTTTTTACTTTTATGGTTGTTAGTGATTTTGGTGAAGGTGCCAGTGGGAATGTTTG	mmu|mt-lncRNA|ATP8|L|7856|125	mmu|mt-lncRNA|ATP8|L|7856	125	mt-lncRNA	protein_coding	L	anti-sense	ATP8	seq start site inside gene	7856	7980	7766	7969		234	147.0	87.0	0.0
TGGGTCTCCTAGTATGTCTGGGAAAAATAATACTAGGGTTATGAGAATTAAGAATATGATTAGGATACCTAGGATATCTTTGATTGTATAGTAGGGGTGAAATGGAATTTTATCTGCATCTGAG	mmu|mt-lncRNA|CytB|L|14780|124	mmu|mt-lncRNA|CytB|L|14780	124	mt-lncRNA	protein_coding	L	anti-sense	CytB	seq start site inside gene	14780	14903	14145	15288		443	309.0	134.0	0.0
TGTTGATCCAATAAATATGATTAGGGAAACAATTATTAGGGTTCATGTTCGTCCTTTTGGTGTGTGGATTAGCATTATTTGTTTGATAATAAGTTTAACTAGTCAGTGTTGG	mmu|mt-lncRNA|ATP6|L|8061|112	mmu|mt-lncRNA|ATP6|L|8061	112	mt-lncRNA	protein_coding	L	anti-sense	ATP6	seq start site inside gene	8061	8172	7927	8607		484	311.0	173.0	0.0
TGTTGATCCAATAAATATGATTAGGGAAACAATTATTAGGGTTCATGTTCGTCCTTTTGGTGTGTGGATTAGCATTATTTGTTTGATAATAAGTTTAACTAGTCAGTGTTGGAAAG	mmu|mt-lncRNA|ATP6|L|8057|116	mmu|mt-lncRNA|ATP6|L|8057	116	mt-lncRNA	protein_coding	L	anti-sense	ATP6	seq start site inside gene	8057	8172	7927	8607		254	162.0	90.0	2.0
TGTTGATCCAATAAATATGATTAGGGAAACAATTATTAGGGTTCATGTTCGTCCTTTTGGTGTGTGGATTAGCATTATTTGTTTGATAATAAGTTTAACTAGTCAGTGTTGGAAAGAAT	mmu|mt-lncRNA|ATP6|L|8054|119	mmu|mt-lncRNA|ATP6|L|8054	119	mt-lncRNA	protein_coding	L	anti-sense	ATP6	seq start site inside gene	8054	8172	7927	8607		240	138.0	101.0	1.0
TGTTGATCCAATAAATATGATTAGGGAAACAATTATTAGGGTTCATGTTCGTCCTTTTGGTGTGTGGATTAGCATTATTTGTTTGATAATAAGTTTAACTAGTCAGTGTTGGAAAGAATGGAGACG	mmu|mt-lncRNA|ATP6|L|8047|126	mmu|mt-lncRNA|ATP6|L|8047	126	mt-lncRNA	protein_coding	L	anti-sense	ATP6	seq start site inside gene	8047	8172	7927	8607		305	202.0	103.0	0.0
TGTTGATCCAATAAATATGATTAGGGAAACAATTATTAGGGTTCATGTTCGTCCTTTTGGTGTGTGGATTAGCATTATTTGTTTGATAATAAGTTTAACTAGTCAGTGTTGGAAAGAATGGAGACGGTTG	mmu|mt-lncRNA|ATP6|L|8043|130	mmu|mt-lncRNA|ATP6|L|8043	130	mt-lncRNA	protein_coding	L	anti-sense	ATP6	seq start site inside gene	8043	8172	7927	8607		255	155.0	99.0	1.0
TGTTGATCCAATAAATATGATTAGGGAAACAATTATTAGGGTTCATGTTCGTCCTTTTGGTGTGTGGATTAGCATTATTTGTTTGATAATAAGTTTAACTAGTCAGTGTTGGAAAGAATGGAGACGGTTGTTG	mmu|mt-lncRNA|ATP6|L|8040|133	mmu|mt-lncRNA|ATP6|L|8040	133	mt-lncRNA	protein_coding	L	anti-sense	ATP6	seq start site inside gene	8040	8172	7927	8607		308	195.0	110.0	3.0
TGTTGATCCAATAAATATGATTAGGGAAACAATTATTAGGGTTCATGTTCGTCCTTTTGGTGTGTGGATTAGCATTATTTGTTTGATAATAAGTTTAACTAGTCAGTGTTGGAAAGAATGGAGACGGTTGTTGATTAGGC	mmu|mt-lncRNA|ATP6|L|8033|140	mmu|mt-lncRNA|ATP6|L|8033	140	mt-lncRNA	protein_coding	L	anti-sense	ATP6	seq start site inside gene	8033	8172	7927	8607		274	185.0	87.0	2.0
TGTTGATCCAATAATTACATGGAGTCCATGGAATCCAGTAGCCATGAAGAATGTAGAACCATAGATACCATCTGAAATGGAGAATGATGTTTCAAAGTATTCTGAAGCTTGGAGGATGGTGAAGTAAAG	mmu|mt-lncRNA|COIII|L|9117|129	mmu|mt-lncRNA|COIII|L|9117	129	mt-lncRNA	protein_coding	L	anti-sense	COIII	seq start site inside gene	9117	9245	8607	9390		295	160.0	135.0	0.0
TGTTGATTAGGCGTTTTGAGGATGGGAATAGGATTGAAGGAAATATAATGATGGCTACAACGATTGGGAATCCTATTATTGTTGGGGTAATGAATGAGGCAAATAGATTTTCG	mmu|mt-lncRNA|ATP8|L|7932|113	mmu|mt-lncRNA|ATP8|L|7932	113	mt-lncRNA	protein_coding	L	anti-sense	ATP8	seq start site inside gene	7932	8044	7766	7969		684	410.0	274.0	0.0
TTCATGTTCGTCCTTTTGGTGTGTGGATTAGCATTATTTGTTTGATAATAAGTTTAACTAGTCAGTGTTGGAAAGAATGGAGACGGTTGTTGATTAGGCGTTTTGAGGATGGGAATAGGATTGAAG	mmu|mt-lncRNA|ATP6|L|8006|126	mmu|mt-lncRNA|ATP6|L|8006	126	mt-lncRNA	protein_coding	L	anti-sense	ATP6	seq start site inside gene	8006	8131	7927	8607		223	132.0	89.0	2.0
TTCCAATCCGTATATTAATTTCATCTGAAGACGTCCTCCACTCATGAGCAGTCCCCTCCCTAGGACTTAAAACTGATGCCATCCCAGGCCGACTAAATCAAGCAACAGTAACATCAAAC	mmu|mt-lncRNA|COII|H|7455|119	mmu|mt-lncRNA|COII|H|7455	119	mt-lncRNA	protein_coding	H	sense	COII	seq start site inside gene	7455	7573	7013	7696		202	114.0	87.0	1.0
TTTAAATCTGTTTGGCGTAAGCAGATTGAGCTAGTTATAATTATTCCTCATAGGGAGAGAAGGATGAAGGGGTATGCTATATATTTTGTTAGTGGGTCTAGAATAATGGAGATGCG	mmu|mt-lncRNA|ND4|L|10899|116	mmu|mt-lncRNA|ND4|L|10899	116	mt-lncRNA	protein_coding	L	anti-sense	ND4	seq start site inside gene	10899	11014	10167	11544		235	148.0	87.0	0.0
TTTACACCTACTACCCAACTATCCATAAATCTAAGTATAGCCATTCCACTATGAGCTGGAGCCGTAATTACAGGCTTCCGACACAAACTAAAAAGCTCACTTGCCCACTTCCTTCCACAAGGAACTCCAATTTCAC	mmu|mt-lncRNA|ATP6|H|8200|136	mmu|mt-lncRNA|ATP6|H|8200	136	mt-lncRNA	protein_coding	H	sense	ATP6	seq start site inside gene	8200	8335	7927	8607		222	133.0	89.0	0.0
TTTGAGGATGGGAATAGGATTGAAGGAAATATAATGATGGCTACAACGATTGGGAATCCTATTATTGTTGGGGTAATGAATGAGGCAAATAGATTTTCG	mmu|mt-lncRNA|ATP8|L|7932|99	mmu|mt-lncRNA|ATP8|L|7932	99	mt-lncRNA	protein_coding	L	anti-sense	ATP8	seq start site inside gene	7932	8030	7766	7969		265	142.0	121.0	2.0
TTTGCATACGCCATTCTACGCTCAATCCCCAATAAACTAGGAGGTGTCCTAGCCTTAATCTTATCTATCCTAATTTTAGCCCTAATACCTTTCCTTCATACCTCAAAGCAACGAAGCCTAATATTCC	mmu|mt-lncRNA|CytB|H|14970|127	mmu|mt-lncRNA|CytB|H|14970	127	mt-lncRNA	protein_coding	H	sense	CytB	seq start site inside gene	14970	15096	14145	15288		221	146.0	75.0	0.0
TTTGGACTGGTAGTTAGAAGAATAAGTGGAATTATGTGAAGGGCTATTAGTGTTAGTTCTCGTGTGTGTGAGGGTTGGAGGTTAATTATATGGTTGGTTAGTTTGCCG	mmu|mt-lncRNA|ND4|L|11414|108	mmu|mt-lncRNA|ND4|L|11414	108	mt-lncRNA	protein_coding	L	anti-sense	ND4	seq start site inside gene	11414	11521	10167	11544		284	177.0	107.0	0.0
TTTTACTTTTATGGTTGTTAGTGATTTTGGTGAAGGTGCCAGTGGGAATGTTTGTGATGAGACTTTTAGTTGAAATAAGATAAATAGGGTAATTATTGATGAGATAATTG	mmu|mt-lncRNA|ATP8|L|7800|110	mmu|mt-lncRNA|ATP8|L|7800	110	mt-lncRNA	protein_coding	L	anti-sense	ATP8	seq start site inside gene	7800	7909	7766	7969		222	133.0	89.0	0.0
TTTTATTATCCCTAACGCTAATTCTAGTTGCATTCTGACTCCCCCAAATAAATCTGTACTCAGAAAAAGCAAATCCATATGAATGCGGATTCG	mmu|mt-lncRNA|ND3|H|9490|93	mmu|mt-lncRNA|ND3|H|9490	93	mt-lncRNA	protein_coding	H	sense	ND3	seq start site inside gene	9490	9582	9459	9806		203	103.0	100.0	0.0
TTTTATTATCCCTAACGCTAATTCTAGTTGCATTCTGACTCCCCCAAATAAATCTGTACTCAGAAAAAGCAAATCCATATGAATGCGGATTCGAC	mmu|mt-lncRNA|ND3|H|9490|95	mmu|mt-lncRNA|ND3|H|9490	95	mt-lncRNA	protein_coding	H	sense	ND3	seq start site inside gene	9490	9584	9459	9806		276	126.0	150.0	0.0
TTTTGCTCATGTGTCATCTAGGGTGAAGCCTGAAAATAATGGGAATCAGTGAACAAATCCTGCTATGATAGCAAACACTGCTCCCATTGATAGAACATAGTGGAAATGGG	mmu|mt-lncRNA|COI|L|6451|110	mmu|mt-lncRNA|COI|L|6451	110	mt-lncRNA	protein_coding	L	anti-sense	COI	seq start site inside gene	6451	6560	5328	6872		363	171.0	189.0	3.0
TTTTGGTGTGTGGATTAGCATTATTTGTTTGATAATAAGTTTAACTAGTCAGTGTTGGAAAGAATGGAGACGGTTGTTGATTAGGCGTTTTGAGGATGGGAATAGGATTGAAG	mmu|mt-lncRNA|ATP6|L|8006|113	mmu|mt-lncRNA|ATP6|L|8006	113	mt-lncRNA	protein_coding	L	anti-sense	ATP6	seq start site inside gene	8006	8118	7927	8607		1072	611.0	453.0	8.0
