# Supplementary material for: mtR_find: A Parallel Processing Tool to Identify and Annotate RNAs Derived from the Mitochondrial Genome
Source: Int J Mol Sci. 2023 Feb 22;24(5):4373. doi: 10.3390/ijms24054373 (PMC10001721; doi:10.3390/ijms24054373)
Supplement: Supplementary file 1 [file ijms-24-04373-s001.zip › Supplementary File S9.xlsx]

## Sheet: hep-C vs un-infected_annot
sequence	baseMean	log2FoldChange	lfcSE	stat	pvalue	padj	Specific-ID	General-ID	subtype	type	bio-type	strand	orientation	annotation	Sequence alignment	Sequence start position(bp)	Sequence end position(bp)	gene-boundary:start(bp)	gene-boundary:end(bp)	substitutions
AACAGCTAAGGACTG	144.229	-3.57311	0.875153	-4.08285	4.44874e-05	0.00284161	hsa|mt-sRNA|Ala|H|as5581|i-tRF-5|15|	hsa|mt-sRNA|Ala|H|as5581	i-tRF-5	normal_1_mismatch	Mt_tRNA	H	anti-sense	Ala	overlap gene boundary	5581	5595	5587	5655
AACAGCTAAGGACTGC	308.226	-3.7491	0.877432	-4.27281	1.93029e-05	0.00165423	hsa|mt-sRNA|Ala|H|as5581|i-tRF-5|16|	hsa|mt-sRNA|Ala|H|as5581	i-tRF-5	normal_1_mismatch	Mt_tRNA	H	anti-sense	Ala	overlap gene boundary	5581	5596	5587	5655
AACAGCTAAGGACTGCA	36.4618	-2.38711	0.815201	-2.92825	0.00340881	0.0325622	hsa|mt-sRNA|Ala|H|as5581|i-tRF-5|17|	hsa|mt-sRNA|Ala|H|as5581	i-tRF-5	normal_1_mismatch	Mt_tRNA	H	anti-sense	Ala	overlap gene boundary	5581	5597	5587	5655
AACAGCTAAGGACTGCAAAACC	39.8302	-2.30568	0.669181	-3.44552	0.000569954	0.0107861	hsa|mt-sRNA|Ala|H|as5581|i-tRF-5|22|	hsa|mt-sRNA|Ala|H|as5581	i-tRF-5	normal_1_mismatch	Mt_tRNA	H	anti-sense	Ala	overlap gene boundary	5581	5602	5587	5655
AACAGCTAAGGACTGCAAAACCC	57.5761	-2.04672	0.680611	-3.00717	0.0026369	0.0275501	hsa|mt-sRNA|Ala|H|as5581|i-tRF-5|23|	hsa|mt-sRNA|Ala|H|as5581	i-tRF-5	normal_1_mismatch	Mt_tRNA	H	anti-sense	Ala	overlap gene boundary	5581	5603	5587	5655
AACAGCTAAGGACTGCAAAACCCC	34.1482	-1.64501	0.639026	-2.57425	0.0100458	0.0636672	hsa|mt-sRNA|Ala|H|as5581|i-tRF-5|24|	hsa|mt-sRNA|Ala|H|as5581	i-tRF-5	normal_1_mismatch	Mt_tRNA	H	anti-sense	Ala	overlap gene boundary	5581	5604	5587	5655
AACAGCTAAGGACTGCAAAACCCCACT	125.07	-1.27141	0.462475	-2.74915	0.00597493	0.0459222	hsa|mt-sRNA|Ala|H|as5581|i-tRF-5|27|	hsa|mt-sRNA|Ala|H|as5581	i-tRF-5	normal_1_mismatch	Mt_tRNA	H	anti-sense	Ala	overlap gene boundary	5581	5607	5587	5655
AACCATCGTTGTATTTCAACTACAAGAACACCA	24.1063	-2.37726	0.755722	-3.14568	0.00165704	0.0201093	hsa|mt-sRNA|Glu|H|as14714|i-tRF-3|33|	hsa|mt-sRNA|Glu|H|as14714	i-tRF-3	normal_1_mismatch	Mt_tRNA	H	anti-sense	Glu	within gene boundary	14714	14746	14674	14742
AACCGGAGATGAAAAC	6.66153	4.65082	1.62921	2.85465	0.00430847	0.0377415	hsa|mt-sRNA|Thr|H|15923|i-tRF-3|16|	hsa|mt-sRNA|Thr|H|15923	i-tRF-3	normal_1_mismatch	Mt_tRNA	H	sense	Thr	within gene boundary	15923	15938	15888	15953
AACCTTTTAAGTTAAAGATTAAGAGAACC	8.78048	2.58395	0.957028	2.69997	0.00693454	0.0505843	hsa|mt-sRNA|Lys|H|8318|i-tRF-5|29|	hsa|mt-sRNA|Lys|H|8318	i-tRF-5	normal_1_mismatch	Mt_tRNA	H	sense	Lys	within gene boundary	8318	8346	8295	8364
AACGATGGTTTTTCATATCATTGGTCGTGGTTGTAGTCCGTGCGAGAATA	161.346	-2.81068	1.13951	-2.46657	0.0136413	0.076437	hsa|mt-sRNA|Glu|L|14674|tRF-3|50|	hsa|mt-sRNA|Glu|L|14674	tRF-3	normal_1_mismatch	Mt_tRNA	L	sense	Glu	within gene boundary	14674	14723	14674	14742
AACGATGGTTTTTCCTATCATTGGTCGTGGTTGTAGTCCGTGCGAGAATA	20.4015	-8.58918	3.38677	-2.5361	0.0112096	0.0683479	hsa|mt-sRNA|Glu|L|14674|tRF-3|50|35T14	hsa|mt-sRNA|Glu|L|14674	tRF-3	normal_1_mismatch	Mt_tRNA	L	sense	Glu	within gene boundary	14674	14723	14674	14742	35T14
AACTGCTAACTCATGCCCCCATGTCTAACAACA	5.82334	4.43839	1.43236	3.09865	0.00194404	0.0225418	hsa|mt-sRNA|Ser2|H|12222|i-tRF-5|33|	hsa|mt-sRNA|Ser2|H|12222	i-tRF-5	normal_1_mismatch	Mt_tRNA	H	sense	Ser2	within gene boundary	12222	12254	12207	12265
AACTGCTAACTCATGCCCCCATGTCTAACAACATGGCTTTCTCACC	24.7389	2.93427	1.05939	2.76977	0.00560956	0.044651	hsa|mt-sRNA|Ser2|H|12222|tRF-3|46|44A1	hsa|mt-sRNA|Ser2|H|12222	tRF-3	normal_1_mismatch	Mt_tRNA	H	sense	Ser2	within gene boundary	12222	12267	12207	12265	44A1
AAGAACTGCTAACTCATGCCCCCATGTCTAACAACA	10.3145	2.72611	1.0259	2.65728	0.0078775	0.0547989	hsa|mt-sRNA|Ser2|H|12219|i-tRF-5|36|	hsa|mt-sRNA|Ser2|H|12219	i-tRF-5	normal_1_mismatch	Mt_tRNA	H	sense	Ser2	within gene boundary	12219	12254	12207	12265
AACTTGACCGCTCTGA	14.5233	-2.51271	1.00503	-2.50013	0.0124148	0.0730327	hsa|mt-sRNA|Val|H|1655|tRF-3|16|	hsa|mt-sRNA|Val|H|1655	tRF-3	normal_1_mismatch	Mt_tRNA	H	sense	Val	within gene boundary	1655	1670	1602	1670
AAGAAGCAGCTTCAAACCTGCCGGGGCT	10.9345	-2.22163	0.95871	-2.31731	0.0204871	0.0983184	hsa|mt-sRNA|Cys|L|5762|tRF-3|28|	hsa|mt-sRNA|Cys|L|5762	tRF-3	normal_1_mismatch	Mt_tRNA	L	sense	Cys	within gene boundary	5762	5789	5761	5826
AAGAGAACCAACACCTCTTTACAGTGAC	160.349	-1.757	0.504875	-3.48006	0.000501295	0.0102216	hsa|mt-sRNA|Lys|H|8338|tRF-3|28|27A0	hsa|mt-sRNA|Lys|H|8338	tRF-3	normal_1_mismatch	Mt_tRNA	H	sense	Lys	within gene boundary	8338	8365	8295	8364	27A0
AAGAGTGTAGCTTAACACAAAGCACCCA	19.7441	-3.88106	0.863116	-4.49657	6.90583e-06	0.000865818	hsa|mt-sRNA|Val|H|1602|tRF-5|28|0C27	hsa|mt-sRNA|Val|H|1602	tRF-5	normal_1_mismatch	Mt_tRNA	H	sense	Val	within gene boundary	1602	1629	1602	1670	0C27
AAGATGGCAGAGCCC	7.14085	3.19466	1.22517	2.60754	0.00911966	0.0600775	hsa|mt-sRNA|Leu|H|3233|tRF-5|15|	hsa|mt-sRNA|Leu|H|3233	tRF-5	normal_1_mismatch	Mt_tRNA	H	sense	Leu	within gene boundary	3233	3247	3230	3304
AAGATTAAGAGAACCAACAC	9.17193	3.34159	1.21937	2.74042	0.00613604	0.0466246	hsa|mt-sRNA|Lys|H|8332|i-tRF-3|20|	hsa|mt-sRNA|Lys|H|8332	i-tRF-3	normal_1_mismatch	Mt_tRNA	H	sense	Lys	within gene boundary	8332	8351	8295	8364
AAGGTATTGGAAAAAC	14.007	2.86709	0.911352	3.14598	0.00165533	0.0201093	hsa|mt-sRNA|Asp|H|7518|tRF-5|16|8A7	hsa|mt-sRNA|Asp|H|7518	tRF-5	normal_1_mismatch	Mt_tRNA	H	sense	Asp	within gene boundary	7518	7533	7518	7585	8A7
AAGGTATTGGAAAAACCATTTCATAACTTTGTCAAAGTTAAATTATAGGC	74.7183	3.62479	1.01144	3.58379	0.000338639	0.00799187	hsa|mt-sRNA|Asp|H|7518|tRF-5|50|8A41	hsa|mt-sRNA|Asp|H|7518	tRF-5	normal_1_mismatch	Mt_tRNA	H	sense	Asp	within gene boundary	7518	7567	7518	7585	8A41
AAGGTATTTGAAAAACCATTTCATAACTTTGTCAAAGTTAAATTATAGGC	23.4801	3.60568	1.35247	2.66598	0.00767633	0.0541923	hsa|mt-sRNA|Asp|H|7518|tRF-5|50|8A41	hsa|mt-sRNA|Asp|H|7518	tRF-5	normal_1_mismatch	Mt_tRNA	H	sense	Asp	within gene boundary	7518	7567	7518	7585	8A41
AATGTTTAGACGGGC	70.2319	3.34974	1.18643	2.82337	0.00475224	0.0405659	hsa|mt-sRNA|Phe|H|614|i-tRF-3|15|	hsa|mt-sRNA|Phe|H|614	i-tRF-3	normal_1_mismatch	Mt_tRNA	H	sense	Phe	within gene boundary	614	628	577	647
AATGTTTAGACGGGCT	74.8779	2.62462	0.951387	2.75873	0.00580264	0.0454692	hsa|mt-sRNA|Phe|H|614|i-tRF-3|16|	hsa|mt-sRNA|Phe|H|614	i-tRF-3	normal_1_mismatch	Mt_tRNA	H	sense	Phe	within gene boundary	614	629	577	647
AATGTTTAGACGGGCTCA	23.1796	1.76284	0.697255	2.52826	0.0114628	0.0690014	hsa|mt-sRNA|Phe|H|614|i-tRF-3|18|	hsa|mt-sRNA|Phe|H|614	i-tRF-3	normal_1_mismatch	Mt_tRNA	H	sense	Phe	within gene boundary	614	631	577	647
AATGTTTAGACGGGCTCACATCACCCCATAA	12.4682	2.51268	1.08786	2.30975	0.0209022	0.0996631	hsa|mt-sRNA|Phe|H|614|tRF-3|31|	hsa|mt-sRNA|Phe|H|614	tRF-3	normal_1_mismatch	Mt_tRNA	H	sense	Phe	within gene boundary	614	644	577	647
ACAACGATGGTTTTTCATATCATTGGTCGTGGTTGTAGTCCGTGCGAGAA	19.9206	-3.21098	1.16036	-2.76722	0.00565372	0.044651	hsa|mt-sRNA|Glu|L|14676|tRF-3|50|	hsa|mt-sRNA|Glu|L|14676	tRF-3	normal_1_mismatch	Mt_tRNA	L	sense	Glu	within gene boundary	14676	14725	14674	14742
ACAAGAACTGCTAACTCATGCCCCCATGTCTAACAACATGGCTTTCT	28.2579	3.31215	1.05316	3.14496	0.00166111	0.0201093	hsa|mt-sRNA|Ser2|H|12217|tRF-3|47|	hsa|mt-sRNA|Ser2|H|12217	tRF-3	normal_1_mismatch	Mt_tRNA	H	sense	Ser2	within gene boundary	12217	12263	12207	12265
ACAAGCACTGCTAACTCATGCCCCCATGTCTAACAACATGGCTTTCT	11.84	3.66245	1.4518	2.5227	0.0116458	0.0693219	hsa|mt-sRNA|Ser2|H|12217|tRF-3|47|5A41	hsa|mt-sRNA|Ser2|H|12217	tRF-3	normal_1_mismatch	Mt_tRNA	H	sense	Ser2	within gene boundary	12217	12263	12207	12265	5A41
ACATGGCTTTCTCACC	18.3256	3.58415	0.912902	3.92611	8.6332e-05	0.00344961	hsa|mt-sRNA|Ser2|H|12252|tRF-3|16|14A1	hsa|mt-sRNA|Ser2|H|12252	tRF-3	normal_1_mismatch	Mt_tRNA	H	sense	Ser2	within gene boundary	12252	12267	12207	12265	14A1
ACCGGAGATGAAAAC	12.5541	6.3874	1.49603	4.26956	1.95857e-05	0.00165423	hsa|mt-sRNA|Thr|H|15924|i-tRF-3|15|	hsa|mt-sRNA|Thr|H|15924	i-tRF-3	normal_1_mismatch	Mt_tRNA	H	sense	Thr	within gene boundary	15924	15938	15888	15953
ACCTTTTAAGTTAAAGATTAAGAGAACC	22.9109	2.51349	0.791502	3.1756	0.00149528	0.0193518	hsa|mt-sRNA|Lys|H|8319|i-tRF-5|28|	hsa|mt-sRNA|Lys|H|8319	i-tRF-5	normal_1_mismatch	Mt_tRNA	H	sense	Lys	within gene boundary	8319	8346	8295	8364
ACGAATGATTTCGACTCA	122.512	3.32162	1.29272	2.56949	0.0101849	0.0636672	hsa|mt-sRNA|Arg|H|10425|i-tRF-5|18|	hsa|mt-sRNA|Arg|H|10425	i-tRF-5	normal_1_mismatch	Mt_tRNA	H	sense	Arg	within gene boundary	10425	10442	10405	10469
ACGATGGTTTTTCATATCATTGGTCGTGGTTGTAGTCCGTGCGAGAATAC	249.672	-3.4599	1.01265	-3.41668	0.000633897	0.0113535	hsa|mt-sRNA|Glu|L|14673|tRF-3|50|0T49	hsa|mt-sRNA|Glu|L|14673	tRF-3	normal_1_mismatch	Mt_tRNA	L	sense	Glu	overlap gene boundary	14673	14722	14674	14742	0T49
ACGGGCTCACATCACC	33.881	3.03748	1.03118	2.94564	0.00322286	0.0315369	hsa|mt-sRNA|Phe|H|623|i-tRF-3|16|	hsa|mt-sRNA|Phe|H|623	i-tRF-3	normal_1_mismatch	Mt_tRNA	H	sense	Phe	within gene boundary	623	638	577	647
ACGGGCTCACATCACCC	15.8916	4.35948	1.31156	3.3239	0.00088768	0.0139116	hsa|mt-sRNA|Phe|H|623|i-tRF-3|17|	hsa|mt-sRNA|Phe|H|623	i-tRF-3	normal_1_mismatch	Mt_tRNA	H	sense	Phe	within gene boundary	623	639	577	647
ACTCTTTTAGTATAAATAGTACCGTTAACTTCC	23.3118	4.08872	1.12764	3.62592	0.000287932	0.0072199	hsa|mt-sRNA|Gly|H|9991|tRF-5|33|	hsa|mt-sRNA|Gly|H|9991	tRF-5	normal_1_mismatch	Mt_tRNA	H	sense	Gly	within gene boundary	9991	10023	9991	10058
ACTCTTTTGGTATAAATAGTACCGTTAACTTCC	44.6545	3.30719	0.95237	3.47259	0.000515461	0.0103402	hsa|mt-sRNA|Gly|H|9991|tRF-5|33|8A24	hsa|mt-sRNA|Gly|H|9991	tRF-5	normal_1_mismatch	Mt_tRNA	H	sense	Gly	within gene boundary	9991	10023	9991	10058	8A24
ACTCTTTTTGTATAAATAGTACCGTTAACTTCC	49.453	3.08103	0.921676	3.34285	0.00082922	0.013738	hsa|mt-sRNA|Gly|H|9991|tRF-5|33|8A24	hsa|mt-sRNA|Gly|H|9991	tRF-5	normal_1_mismatch	Mt_tRNA	H	sense	Gly	within gene boundary	9991	10023	9991	10058	8A24
ACTTAACTTGACCGCTC	11.2448	2.39362	0.85845	2.7883	0.00529847	0.042515	hsa|mt-sRNA|Val|H|1651|tRF-3|17|	hsa|mt-sRNA|Val|H|1651	tRF-3	normal_1_mismatch	Mt_tRNA	H	sense	Val	within gene boundary	1651	1667	1602	1670
ACTTACACTTAGGAGATTTCAACTTAACTTGACCGCTC	7.81609	3.50288	1.22418	2.86142	0.00421752	0.0372702	hsa|mt-sRNA|Val|H|1630|tRF-3|38|	hsa|mt-sRNA|Val|H|1630	tRF-3	normal_1_mismatch	Mt_tRNA	H	sense	Val	within gene boundary	1630	1667	1602	1670
ACTTTGTCAAAGTTAAATTATAGGCT	21.4146	3.15503	1.05672	2.98569	0.00282942	0.0286657	hsa|mt-sRNA|Asp|H|7543|i-tRF-5|26|	hsa|mt-sRNA|Asp|H|7543	i-tRF-5	normal_1_mismatch	Mt_tRNA	H	sense	Asp	within gene boundary	7543	7568	7518	7585
ACTTTTAAAGGATAACAGCT	25.3603	3.0587	0.917842	3.33249	0.000860731	0.013813	hsa|mt-sRNA|Leu2|H|12266|tRF-5|20|	hsa|mt-sRNA|Leu2|H|12266	tRF-5	normal_1_mismatch	Mt_tRNA	H	sense	Leu2	within gene boundary	12266	12285	12266	12336
ACTTTTAATGGATAACAGCT	36.5937	2.37456	0.82923	2.86357	0.00418897	0.0372702	hsa|mt-sRNA|Leu2|H|12266|tRF-5|20|8A11	hsa|mt-sRNA|Leu2|H|12266	tRF-5	normal_1_mismatch	Mt_tRNA	H	sense	Leu2	within gene boundary	12266	12285	12266	12336	8A11
ACTTTTAAGGGATAACAGCT	34.1183	2.71964	0.791937	3.43416	0.000594388	0.0108395	hsa|mt-sRNA|Leu2|H|12266|tRF-5|20|8A11	hsa|mt-sRNA|Leu2|H|12266	tRF-5	normal_1_mismatch	Mt_tRNA	H	sense	Leu2	within gene boundary	12266	12285	12266	12336	8A11
ACTTTTAAGGGATAACAGCTATCCATTGGTCTT	108.183	2.15705	0.905441	2.38232	0.017204	0.0893592	hsa|mt-sRNA|Leu2|H|12266|tRF-5|33|8A24	hsa|mt-sRNA|Leu2|H|12266	tRF-5	normal_1_mismatch	Mt_tRNA	H	sense	Leu2	within gene boundary	12266	12298	12266	12336	8A24
AGAAAGCTCACAAGAACTGCTAACTCATGCCCCCATGTCTAACAACA	5.954	3.08114	1.19917	2.56938	0.010188	0.0636672	hsa|mt-sRNA|Ser2|H|12208|tRF-5|47|	hsa|mt-sRNA|Ser2|H|12208	tRF-5	normal_1_mismatch	Mt_tRNA	H	sense	Ser2	within gene boundary	12208	12254	12207	12265
AGAAATATGTCTGATAAAAGATTTACTTTGATAGAGTAAATAATAGGAGC	11.2952	2.83595	1.06558	2.66142	0.00778109	0.0544739	hsa|mt-sRNA|Ile|H|4263|tRF-5|50|21G28	hsa|mt-sRNA|Ile|H|4263	tRF-5	normal_1_mismatch	Mt_tRNA	H	sense	Ile	within gene boundary	4263	4312	4263	4331	21G28
AGAACTGCTAACTCATGCCCCCATGTCTAACA	14.3676	3.26383	1.06884	3.05362	0.00226099	0.0249098	hsa|mt-sRNA|Ser2|H|12220|i-tRF-5|32|	hsa|mt-sRNA|Ser2|H|12220	i-tRF-5	normal_1_mismatch	Mt_tRNA	H	sense	Ser2	within gene boundary	12220	12251	12207	12265
AGAACTGCTAACTCATGCCCCCATGTCTAACAACA	30.3998	3.06714	1.22998	2.49366	0.0126434	0.073708	hsa|mt-sRNA|Ser2|H|12220|i-tRF-5|35|	hsa|mt-sRNA|Ser2|H|12220	i-tRF-5	normal_1_mismatch	Mt_tRNA	H	sense	Ser2	within gene boundary	12220	12254	12207	12265
AGACGGGCTCACATC	105.743	4.01827	1.10123	3.64891	0.000263357	0.006879	hsa|mt-sRNA|Phe|H|621|i-tRF-3|15|	hsa|mt-sRNA|Phe|H|621	i-tRF-3	normal_1_mismatch	Mt_tRNA	H	sense	Phe	within gene boundary	621	635	577	647
AGACGGGCTCACATCAC	31.858	4.36737	1.38736	3.14798	0.00164401	0.0201093	hsa|mt-sRNA|Phe|H|621|i-tRF-3|17|	hsa|mt-sRNA|Phe|H|621	i-tRF-3	normal_1_mismatch	Mt_tRNA	H	sense	Phe	within gene boundary	621	637	577	647
AGACGGGCTCACATCACC	26.9352	3.90132	1.18967	3.27933	0.00104053	0.015694	hsa|mt-sRNA|Phe|H|621|i-tRF-3|18|	hsa|mt-sRNA|Phe|H|621	i-tRF-3	normal_1_mismatch	Mt_tRNA	H	sense	Phe	within gene boundary	621	638	577	647
AGACGGGCTCACATCACCC	12.755	3.99597	1.26767	3.15221	0.00162041	0.0201093	hsa|mt-sRNA|Phe|H|621|i-tRF-3|19|	hsa|mt-sRNA|Phe|H|621	i-tRF-3	normal_1_mismatch	Mt_tRNA	H	sense	Phe	within gene boundary	621	639	577	647
AGCACCCAACTTACACTTAGGAGATTTCAACTTAACTTGACCGCTCTGAC	11.838	2.74543	1.14061	2.40699	0.0160846	0.0853592	hsa|mt-sRNA|Val|H|1622|tRF-3|50|49G0	hsa|mt-sRNA|Val|H|1622	tRF-3	normal_1_mismatch	Mt_tRNA	H	sense	Val	within gene boundary	1622	1671	1602	1670	49G0
AGATTTCAACTTAACTTGACCGCTCTG	3.85859	-3.5119	1.24736	-2.81545	0.00487082	0.0408823	hsa|mt-sRNA|Val|H|1643|tRF-3|27|	hsa|mt-sRNA|Val|H|1643	tRF-3	normal_1_mismatch	Mt_tRNA	H	sense	Val	within gene boundary	1643	1669	1602	1670
AGGAAGGTCAGCTAAATAAGCTATCGGGCCC	31.4269	-7.81186	1.9363	-4.03444	5.47333e-05	0.00298576	hsa|mt-sRNA|Met|H|4402|tRF-5|31|2T28	hsa|mt-sRNA|Met|H|4402	tRF-5	normal_1_mismatch	Mt_tRNA	H	sense	Met	within gene boundary	4402	4432	4402	4469	2T28
AGTAAGGTCAGCTAAATAAGCTATCGGACCCA	8.4195	-2.55229	0.852127	-2.99519	0.00274271	0.0282148	hsa|mt-sRNA|Met|H|4402|tRF-5|32|27G4	hsa|mt-sRNA|Met|H|4402	tRF-5	normal_1_mismatch	Mt_tRNA	H	sense	Met	within gene boundary	4402	4433	4402	4469	27G4
AGTAAGGTCAGCTAAATAAGCTATCGGGC	409.709	-1.68865	0.504543	-3.3469	0.000817216	0.013738	hsa|mt-sRNA|Met|H|4402|tRF-5|29|	hsa|mt-sRNA|Met|H|4402	tRF-5	normal_1_mismatch	Mt_tRNA	H	sense	Met	within gene boundary	4402	4430	4402	4469
AGTACGGTCAGCTAAATAAGCTATCGGGCCC	20.682	-4.71737	1.6625	-2.83751	0.00454664	0.0391441	hsa|mt-sRNA|Met|H|4402|tRF-5|31|4A26	hsa|mt-sRNA|Met|H|4402	tRF-5	normal_1_mismatch	Mt_tRNA	H	sense	Met	within gene boundary	4402	4432	4402	4469	4A26
AGTAAGGTCCGCTAAATAAGCTATCGGGCCCATA	44.7379	-9.72133	3.38493	-2.87195	0.00407952	0.0367396	hsa|mt-sRNA|Met|H|4402|tRF-5|34|9A24	hsa|mt-sRNA|Met|H|4402	tRF-5	normal_1_mismatch	Mt_tRNA	H	sense	Met	within gene boundary	4402	4435	4402	4469	9A24
AGTAAGGTCCGCTAAATAAGCTATCGGGCCCATACCCCGAAAATGTTGGT	65.7695	-6.41092	1.65591	-3.87155	0.000108147	0.00394441	hsa|mt-sRNA|Met|H|4402|tRF-5|50|9A40	hsa|mt-sRNA|Met|H|4402	tRF-5	normal_1_mismatch	Mt_tRNA	H	sense	Met	within gene boundary	4402	4451	4402	4469	9A40
AGTAAGGTTAGCTAAATAAGCTATCGGGCC	19.562	2.24564	0.941066	2.38627	0.0170202	0.0886817	hsa|mt-sRNA|Met|H|4402|tRF-5|30|8C21	hsa|mt-sRNA|Met|H|4402	tRF-5	normal_1_mismatch	Mt_tRNA	H	sense	Met	within gene boundary	4402	4431	4402	4469	8C21
AGTAAGGTTAGCTAAATAAGCTATCGGGCCC	96.654	2.37122	0.780794	3.03693	0.00239002	0.0259156	hsa|mt-sRNA|Met|H|4402|tRF-5|31|8C22	hsa|mt-sRNA|Met|H|4402	tRF-5	normal_1_mismatch	Mt_tRNA	H	sense	Met	within gene boundary	4402	4432	4402	4469	8C22
AGTAAGGTCAGCTAAATAAGCTATCGGGCCCATACACC	21.6244	1.74191	0.715429	2.43479	0.0149006	0.0810045	hsa|mt-sRNA|Met|H|4402|tRF-5|38|35C2	hsa|mt-sRNA|Met|H|4402	tRF-5	normal_1_mismatch	Mt_tRNA	H	sense	Met	within gene boundary	4402	4439	4402	4469	35C2
AGTAAGGTCAGCTACATAAGCTATCGGGC	18.0386	-8.41089	3.38722	-2.48312	0.0130235	0.0749778	hsa|mt-sRNA|Met|H|4402|tRF-5|29|14A14	hsa|mt-sRNA|Met|H|4402	tRF-5	normal_1_mismatch	Mt_tRNA	H	sense	Met	within gene boundary	4402	4430	4402	4469	14A14
AGTAAGGTCAGCTACATAAGCTATCGGGCC	13.8974	-8.03526	3.38836	-2.37143	0.0177195	0.0901838	hsa|mt-sRNA|Met|H|4402|tRF-5|30|14A15	hsa|mt-sRNA|Met|H|4402	tRF-5	normal_1_mismatch	Mt_tRNA	H	sense	Met	within gene boundary	4402	4431	4402	4469	14A15
AGTAAGGTCAGCTACATAAGCTATCGGGCCC	157.877	-25.879	3.38381	-7.64788	2.04323e-14	4.09872e-11	hsa|mt-sRNA|Met|H|4402|tRF-5|31|14A16	hsa|mt-sRNA|Met|H|4402	tRF-5	normal_1_mismatch	Mt_tRNA	H	sense	Met	within gene boundary	4402	4432	4402	4469	14A16
AGTAAGGTCAGCTACATAAGCTATCGGGCCCA	14.0232	-8.0479	3.38832	-2.37519	0.0175399	0.0901175	hsa|mt-sRNA|Met|H|4402|tRF-5|32|14A17	hsa|mt-sRNA|Met|H|4402	tRF-5	normal_1_mismatch	Mt_tRNA	H	sense	Met	within gene boundary	4402	4433	4402	4469	14A17
AGTAAGGTCAGCTACATAAGCTATCGGGCCCATA	14.5971	-7.3801	3.07267	-2.40185	0.0163123	0.0858932	hsa|mt-sRNA|Met|H|4402|tRF-5|34|14A19	hsa|mt-sRNA|Met|H|4402	tRF-5	normal_1_mismatch	Mt_tRNA	H	sense	Met	within gene boundary	4402	4435	4402	4469	14A19
AGTAAGGTCAGCTACATAAGCTATCGGGCCCATACCCCGAAAATGTTGGT	27.5646	-9.02333	3.38589	-2.66498	0.0076993	0.0541923	hsa|mt-sRNA|Met|H|4402|tRF-5|50|14A35	hsa|mt-sRNA|Met|H|4402	tRF-5	normal_1_mismatch	Mt_tRNA	H	sense	Met	within gene boundary	4402	4451	4402	4469	14A35
AGTAAGGTCCGCTAAATAAGCTATCGGGC	35.0571	-8.64405	3.31504	-2.60753	0.00911992	0.0600775	hsa|mt-sRNA|Met|H|4402|tRF-5|29|9A19	hsa|mt-sRNA|Met|H|4402	tRF-5	normal_1_mismatch	Mt_tRNA	H	sense	Met	within gene boundary	4402	4430	4402	4469	9A19
AGTAAGGTCCGCTAAATAAGCTATCGGGCC	36.2006	-7.29239	1.78337	-4.08911	4.33037e-05	0.00284161	hsa|mt-sRNA|Met|H|4402|tRF-5|30|9A20	hsa|mt-sRNA|Met|H|4402	tRF-5	normal_1_mismatch	Mt_tRNA	H	sense	Met	within gene boundary	4402	4431	4402	4469	9A20
AGTAAGGTCCGCTAAATAAGCTATCGGGCCC	330.369	-7.69994	1.61545	-4.76644	1.87507e-06	0.000376844	hsa|mt-sRNA|Met|H|4402|tRF-5|31|9A21	hsa|mt-sRNA|Met|H|4402	tRF-5	normal_1_mismatch	Mt_tRNA	H	sense	Met	within gene boundary	4402	4432	4402	4469	9A21
AGTAAGGTCCGCTAAATAAGCTATCGGGCCCA	33.4423	-7.78742	1.91275	-4.07133	4.67464e-05	0.00284161	hsa|mt-sRNA|Met|H|4402|tRF-5|32|9A22	hsa|mt-sRNA|Met|H|4402	tRF-5	normal_1_mismatch	Mt_tRNA	H	sense	Met	within gene boundary	4402	4433	4402	4469	9A22
AGTGAAGCATTGGAC	22.0298	3.29395	1.31622	2.50258	0.0123292	0.072957	hsa|mt-sRNA|Tyr|L|5864|i-tRF-5|15|	hsa|mt-sRNA|Tyr|L|5864	i-tRF-5	normal_1_mismatch	Mt_tRNA	L	sense	Tyr	within gene boundary	5864	5878	5826	5891
AGTCAGGTCAGCTAAATAAGCTATCGGGCCC	44.5336	-7.17431	1.6311	-4.39843	1.09035e-05	0.00118937	hsa|mt-sRNA|Met|H|4402|tRF-5|31|3A27	hsa|mt-sRNA|Met|H|4402	tRF-5	normal_1_mismatch	Mt_tRNA	H	sense	Met	within gene boundary	4402	4432	4402	4469	3A27
AGTCAGGTCAGCTAAATAAGCTATCGGGCCCA	2.76938	-5.70897	2.04063	-2.79766	0.00514746	0.0419749	hsa|mt-sRNA|Met|H|4402|tRF-5|32|3A28	hsa|mt-sRNA|Met|H|4402	tRF-5	normal_1_mismatch	Mt_tRNA	H	sense	Met	within gene boundary	4402	4433	4402	4469	3A28
AGTAAGGTCAGCTAAATAAGCTATCGGGCCCCTA	10.3618	3.79421	1.02525	3.70076	0.000214951	0.00617804	hsa|mt-sRNA|Met|H|4402|tRF-5|34|31A2	hsa|mt-sRNA|Met|H|4402	tRF-5	normal_1_mismatch	Mt_tRNA	H	sense	Met	within gene boundary	4402	4435	4402	4469	31A2
AGTAAGGTCAGCTAAATAAGCTATCGGGCCCCTACCCCGAAAATGTTGGT	33.7231	7.05542	1.44434	4.88486	1.03501e-06	0.000346037	hsa|mt-sRNA|Met|H|4402|tRF-5|50|31A18	hsa|mt-sRNA|Met|H|4402	tRF-5	normal_1_mismatch	Mt_tRNA	H	sense	Met	within gene boundary	4402	4451	4402	4469	31A18
AGTAAGGTCAGCTAAATAAGCTATCGGGCCTA	30.3659	-1.34926	0.569384	-2.36969	0.017803	0.0901838	hsa|mt-sRNA|Met|H|4402|tRF-5|32|30C1	hsa|mt-sRNA|Met|H|4402	tRF-5	normal_1_mismatch	Mt_tRNA	H	sense	Met	within gene boundary	4402	4433	4402	4469	30C1
AGTAAGGTCAGCTAAATAAGCTATCGGGCCCC	32.5236	3.21617	0.798067	4.02995	5.57888e-05	0.00298576	hsa|mt-sRNA|Met|H|4402|tRF-5|32|31A0	hsa|mt-sRNA|Met|H|4402	tRF-5	normal_1_mismatch	Mt_tRNA	H	sense	Met	within gene boundary	4402	4433	4402	4469	31A0
ATAATAGGAGCTTAAACC	8.78818	2.88079	1.24737	2.30949	0.0209163	0.0996631	hsa|mt-sRNA|Ile|H|4302|i-tRF-3|18|	hsa|mt-sRNA|Ile|H|4302	i-tRF-3	normal_1_mismatch	Mt_tRNA	H	sense	Ile	within gene boundary	4302	4319	4263	4331
ATAGAGTAAATAATAGGAGCT	16.2846	3.13834	1.12491	2.78987	0.00527299	0.0424804	hsa|mt-sRNA|Ile|H|4293|i-tRF-5|21|	hsa|mt-sRNA|Ile|H|4293	i-tRF-5	normal_1_mismatch	Mt_tRNA	H	sense	Ile	within gene boundary	4293	4313	4263	4331
ATAGAGTAAATAATAGGAGCTTAAACCC	20.1231	2.27398	0.957905	2.37391	0.017601	0.0901175	hsa|mt-sRNA|Ile|H|4293|i-tRF-5|28|	hsa|mt-sRNA|Ile|H|4293	i-tRF-5	normal_1_mismatch	Mt_tRNA	H	sense	Ile	within gene boundary	4293	4320	4263	4331
ATCCATTGGTCTTAG	21.6557	2.59287	0.776661	3.33849	0.000842362	0.013738	hsa|mt-sRNA|Leu2|H|12286|i-tRF-5|15|	hsa|mt-sRNA|Leu2|H|12286	i-tRF-5	normal_1_mismatch	Mt_tRNA	H	sense	Leu2	within gene boundary	12286	12300	12266	12336
ATGCCCCCATGTCTAACAACATGGCTTTCTCACC	7.86762	2.98816	1.26206	2.36768	0.0178999	0.0902217	hsa|mt-sRNA|Ser2|H|12234|tRF-3|34|32A1	hsa|mt-sRNA|Ser2|H|12234	tRF-3	normal_1_mismatch	Mt_tRNA	H	sense	Ser2	within gene boundary	12234	12267	12207	12265	32A1
ATGTTTAGACGGGCT	2060.39	3.83544	1.20739	3.17662	0.00149	0.0193518	hsa|mt-sRNA|Phe|H|615|i-tRF-3|15|	hsa|mt-sRNA|Phe|H|615	i-tRF-3	normal_1_mismatch	Mt_tRNA	H	sense	Phe	within gene boundary	615	629	577	647
ATGTTTAGACGGGCTC	1978.24	3.13349	1.06438	2.94395	0.00324052	0.0315557	hsa|mt-sRNA|Phe|H|615|i-tRF-3|16|	hsa|mt-sRNA|Phe|H|615	i-tRF-3	normal_1_mismatch	Mt_tRNA	H	sense	Phe	within gene boundary	615	630	577	647
ATGTTTAGACGGGCTCA	172.601	3.52243	0.913806	3.85467	0.000115884	0.00401207	hsa|mt-sRNA|Phe|H|615|i-tRF-3|17|	hsa|mt-sRNA|Phe|H|615	i-tRF-3	normal_1_mismatch	Mt_tRNA	H	sense	Phe	within gene boundary	615	631	577	647
ATGTTTAGACGGGCTCACATC	74.3021	3.28007	1.01438	3.23358	0.00122251	0.0171493	hsa|mt-sRNA|Phe|H|615|i-tRF-3|21|	hsa|mt-sRNA|Phe|H|615	i-tRF-3	normal_1_mismatch	Mt_tRNA	H	sense	Phe	within gene boundary	615	635	577	647
ATGTTTAGACGGGCTCACATCA	6.14258	3.48924	1.3211	2.64116	0.00826218	0.0565663	hsa|mt-sRNA|Phe|H|615|i-tRF-3|22|	hsa|mt-sRNA|Phe|H|615	i-tRF-3	normal_1_mismatch	Mt_tRNA	H	sense	Phe	within gene boundary	615	636	577	647
ATGTTTAGACGGGCTCACATCAC	11.388	3.09245	1.16219	2.66088	0.00779362	0.0544739	hsa|mt-sRNA|Phe|H|615|i-tRF-3|23|	hsa|mt-sRNA|Phe|H|615	i-tRF-3	normal_1_mismatch	Mt_tRNA	H	sense	Phe	within gene boundary	615	637	577	647
ATGTTTAGACGGGCTCACATCACC	76.9418	2.89358	1.16994	2.47328	0.0133878	0.0755176	hsa|mt-sRNA|Phe|H|615|i-tRF-3|24|	hsa|mt-sRNA|Phe|H|615	i-tRF-3	normal_1_mismatch	Mt_tRNA	H	sense	Phe	within gene boundary	615	638	577	647
ATGTTTAGACGGGCTCACATCACCC	195.819	4.59586	1.38575	3.31652	0.000911453	0.0141734	hsa|mt-sRNA|Phe|H|615|i-tRF-3|25|	hsa|mt-sRNA|Phe|H|615	i-tRF-3	normal_1_mismatch	Mt_tRNA	H	sense	Phe	within gene boundary	615	639	577	647
ATGTTTAGACGGGCTCACATCACCCC	48.4074	4.38817	1.17133	3.74632	0.000179446	0.00562452	hsa|mt-sRNA|Phe|H|615|i-tRF-3|26|	hsa|mt-sRNA|Phe|H|615	i-tRF-3	normal_1_mismatch	Mt_tRNA	H	sense	Phe	within gene boundary	615	640	577	647
ATGTTTAGACGGGCTCACATCACCCCA	61.0382	3.49463	1.17995	2.96169	0.00305959	0.0302663	hsa|mt-sRNA|Phe|H|615|i-tRF-3|27|	hsa|mt-sRNA|Phe|H|615	i-tRF-3	normal_1_mismatch	Mt_tRNA	H	sense	Phe	within gene boundary	615	641	577	647
ATGTTTAGACGGGCTCACATCACCCCATA	18.0806	2.45141	0.988427	2.48011	0.0131342	0.075063	hsa|mt-sRNA|Phe|H|615|i-tRF-3|29|	hsa|mt-sRNA|Phe|H|615	i-tRF-3	normal_1_mismatch	Mt_tRNA	H	sense	Phe	within gene boundary	615	643	577	647
ATGTTTAGACGGGCTCACATCACCCCATAA	45.7461	2.87161	1.16079	2.47384	0.013367	0.0755176	hsa|mt-sRNA|Phe|H|615|tRF-3|30|	hsa|mt-sRNA|Phe|H|615	tRF-3	normal_1_mismatch	Mt_tRNA	H	sense	Phe	within gene boundary	615	644	577	647
ATGTTTAGACGGGCTCACATCACCCCATAAA	63.5688	2.65283	1.01501	2.6136	0.00895934	0.0600678	hsa|mt-sRNA|Phe|H|615|tRF-3|31|	hsa|mt-sRNA|Phe|H|615	tRF-3	normal_1_mismatch	Mt_tRNA	H	sense	Phe	within gene boundary	615	645	577	647
ATTTCAACTTAACTTGACCGCTCTGACC	50.4344	-2.64626	1.11114	-2.38156	0.0172393	0.0893592	hsa|mt-sRNA|Val|H|1645|tRF-3|28|26G1	hsa|mt-sRNA|Val|H|1645	tRF-3	normal_1_mismatch	Mt_tRNA	H	sense	Val	within gene boundary	1645	1672	1602	1670	26G1
ATTTTGGTGCAACTC	13.9561	3.31638	1.2128	2.73448	0.00624784	0.047295	hsa|mt-sRNA|Leu2|H|12310|i-tRF-3|15|	hsa|mt-sRNA|Leu2|H|12310	i-tRF-3	normal_1_mismatch	Mt_tRNA	H	sense	Leu2	within gene boundary	12310	12324	12266	12336
CAACATGGCTTTCTCACC	18.9274	2.78341	1.18446	2.34993	0.0187769	0.0927745	hsa|mt-sRNA|Ser2|H|12250|tRF-3|18|16A1	hsa|mt-sRNA|Ser2|H|12250	tRF-3	normal_1_mismatch	Mt_tRNA	H	sense	Ser2	within gene boundary	12250	12267	12207	12265	16A1
CAAGAACTGCTAACTCATGCCCCCATGTCTAACAACATGGCTTTCT	21.5839	3.16938	1.13233	2.79898	0.00512635	0.0419749	hsa|mt-sRNA|Ser2|H|12218|tRF-3|46|	hsa|mt-sRNA|Ser2|H|12218	tRF-3	normal_1_mismatch	Mt_tRNA	H	sense	Ser2	within gene boundary	12218	12263	12207	12265
CAAGACCTGCTAACTCATGCCCCCATGTCTAACAACATGGCTTTCT	5.25087	4.27797	1.55598	2.74937	0.00597097	0.0459222	hsa|mt-sRNA|Ser2|H|12218|tRF-3|46|5A40	hsa|mt-sRNA|Ser2|H|12218	tRF-3	normal_1_mismatch	Mt_tRNA	H	sense	Ser2	within gene boundary	12218	12263	12207	12265	5A40
CAACTTACACTTAGGAGATTTCAACTTAACTTGACCGCTCTGA	2.63812	-4.93971	1.83528	-2.69153	0.00711254	0.0514151	hsa|mt-sRNA|Val|H|1628|tRF-3|43|	hsa|mt-sRNA|Val|H|1628	tRF-3	normal_1_mismatch	Mt_tRNA	H	sense	Val	within gene boundary	1628	1670	1602	1670
CAAGAACTGCTAACTCATGCCCCCATGTCTAACA	4.32876	4.85935	1.5426	3.15011	0.00163207	0.0201093	hsa|mt-sRNA|Ser2|H|12218|i-tRF-5|34|	hsa|mt-sRNA|Ser2|H|12218	i-tRF-5	normal_1_mismatch	Mt_tRNA	H	sense	Ser2	within gene boundary	12218	12251	12207	12265
CACTGTAAAGCTAAC	30.2751	1.85336	0.693446	2.67268	0.00752472	0.0535269	hsa|mt-sRNA|Lys|H|8295|tRF-5|15|	hsa|mt-sRNA|Lys|H|8295	tRF-5	normal_1_mismatch	Mt_tRNA	H	sense	Lys	within gene boundary	8295	8309	8295	8364
CACTGTAAAGCTAACT	159.822	1.76706	0.580371	3.04471	0.00232902	0.0253914	hsa|mt-sRNA|Lys|H|8295|tRF-5|16|	hsa|mt-sRNA|Lys|H|8295	tRF-5	normal_1_mismatch	Mt_tRNA	H	sense	Lys	within gene boundary	8295	8310	8295	8364
CACTGTAAAGCTAACTTAGCATTAACCTTTTACGTTAAAGATTAAGAGAA	16.4371	3.62295	1.1198	3.23536	0.00121488	0.0171493	hsa|mt-sRNA|Lys|H|8295|tRF-5|50|32A17	hsa|mt-sRNA|Lys|H|8295	tRF-5	normal_1_mismatch	Mt_tRNA	H	sense	Lys	within gene boundary	8295	8344	8295	8364	32A17
CACTGTAAGGCTAACT	181.311	1.61068	0.685291	2.35036	0.0187554	0.0927745	hsa|mt-sRNA|Lys|H|8295|tRF-5|16|8A7	hsa|mt-sRNA|Lys|H|8295	tRF-5	normal_1_mismatch	Mt_tRNA	H	sense	Lys	within gene boundary	8295	8310	8295	8364	8A7
CACTGTAAGGCTAACTTAGCATTAAC	26.553	2.51369	0.725868	3.46302	0.000534155	0.0105051	hsa|mt-sRNA|Lys|H|8295|tRF-5|26|8A17	hsa|mt-sRNA|Lys|H|8295	tRF-5	normal_1_mismatch	Mt_tRNA	H	sense	Lys	within gene boundary	8295	8320	8295	8364	8A17
CACTGTAAGGCTAACTTAGCATTAACC	82.5452	1.12214	0.483597	2.32041	0.0203189	0.097745	hsa|mt-sRNA|Lys|H|8295|tRF-5|27|8A18	hsa|mt-sRNA|Lys|H|8295	tRF-5	normal_1_mismatch	Mt_tRNA	H	sense	Lys	within gene boundary	8295	8321	8295	8364	8A18
CACTGTAAAGCTAACTTAGCATTAACCTTTTAAGTTAA	37.1886	-2.07485	0.620549	-3.34358	0.000827063	0.013738	hsa|mt-sRNA|Lys|H|8295|tRF-5|38|	hsa|mt-sRNA|Lys|H|8295	tRF-5	normal_1_mismatch	Mt_tRNA	H	sense	Lys	within gene boundary	8295	8332	8295	8364
CACTGTAAGGCTAACTTAGCATTAACCTTTTAAG	127.459	2.7577	0.802159	3.43784	0.000586364	0.0107913	hsa|mt-sRNA|Lys|H|8295|tRF-5|34|8A25	hsa|mt-sRNA|Lys|H|8295	tRF-5	normal_1_mismatch	Mt_tRNA	H	sense	Lys	within gene boundary	8295	8328	8295	8364	8A25
CACTGTCAAGCTAACTTAGCATTAACCTTTTAAGTTAAAGATTAAGAGAA	20.3352	-6.36516	1.82686	-3.4842	0.000493605	0.010208	hsa|mt-sRNA|Lys|H|8295|tRF-5|50|6A43	hsa|mt-sRNA|Lys|H|8295	tRF-5	normal_1_mismatch	Mt_tRNA	H	sense	Lys	within gene boundary	8295	8344	8295	8364	6A43
CACTGTAATGCTAACTTAGCATTAACCTTTTAAG	57.8334	2.94084	0.880771	3.33894	0.000840992	0.013738	hsa|mt-sRNA|Lys|H|8295|tRF-5|34|8A25	hsa|mt-sRNA|Lys|H|8295	tRF-5	normal_1_mismatch	Mt_tRNA	H	sense	Lys	within gene boundary	8295	8328	8295	8364	8A25
CACTGTAATGCTAACT	97.8332	1.72611	0.718668	2.40182	0.0163137	0.0858932	hsa|mt-sRNA|Lys|H|8295|tRF-5|16|8A7	hsa|mt-sRNA|Lys|H|8295	tRF-5	normal_1_mismatch	Mt_tRNA	H	sense	Lys	within gene boundary	8295	8310	8295	8364	8A7
CAGAGTGTAGCTTAACACAAAGCACCCAAA	308.547	-1.38179	0.558996	-2.47192	0.013439	0.0755176	hsa|mt-sRNA|Val|H|1602|tRF-5|30|29C0	hsa|mt-sRNA|Val|H|1602	tRF-5	normal_1_mismatch	Mt_tRNA	H	sense	Val	within gene boundary	1602	1631	1602	1670	29C0
CAGAGTGTTGCTTAAC	175.737	2.8831	1.05877	2.72307	0.00646782	0.0482322	hsa|mt-sRNA|Val|H|1602|tRF-5|16|8A7	hsa|mt-sRNA|Val|H|1602	tRF-5	normal_1_mismatch	Mt_tRNA	H	sense	Val	within gene boundary	1602	1617	1602	1670	8A7
CAGAGTGTTGCTTAACA	10.1289	2.38498	0.972218	2.45314	0.0141617	0.0785421	hsa|mt-sRNA|Val|H|1602|tRF-5|17|8A8	hsa|mt-sRNA|Val|H|1602	tRF-5	normal_1_mismatch	Mt_tRNA	H	sense	Val	within gene boundary	1602	1618	1602	1670	8A8
CAGAGTGTTGCTTAACACAAAGCACCCAACTTACACTTAGGAGATTTCAA	340.108	2.38461	0.862488	2.7648	0.0056957	0.0448062	hsa|mt-sRNA|Val|H|1602|tRF-5|50|8A41	hsa|mt-sRNA|Val|H|1602	tRF-5	normal_1_mismatch	Mt_tRNA	H	sense	Val	within gene boundary	1602	1651	1602	1670	8A41
CAGAGTGTAGCTTAACACAAAGCACCCC	21.5472	-3.26298	1.18927	-2.74368	0.00607552	0.0465172	hsa|mt-sRNA|Val|H|1602|tRF-5|28|27A0	hsa|mt-sRNA|Val|H|1602	tRF-5	normal_1_mismatch	Mt_tRNA	H	sense	Val	within gene boundary	1602	1629	1602	1670	27A0
CAGAGTGTAGCTTAACCCAAAGCACCCA	98.2623	-10.064	3.38351	-2.97444	0.00293523	0.0295883	hsa|mt-sRNA|Val|H|1602|tRF-5|28|16A11	hsa|mt-sRNA|Val|H|1602	tRF-5	normal_1_mismatch	Mt_tRNA	H	sense	Val	within gene boundary	1602	1629	1602	1670	16A11
CAGAGTGTAGCTTAACCCAAAGCACCCAA	19.9649	-8.55768	3.38685	-2.52674	0.0115128	0.0690014	hsa|mt-sRNA|Val|H|1602|tRF-5|29|16A12	hsa|mt-sRNA|Val|H|1602	tRF-5	normal_1_mismatch	Mt_tRNA	H	sense	Val	within gene boundary	1602	1630	1602	1670	16A12
CAGAGTGTAGCTTACCACAAAGCACCCA	64.2963	-10.2447	3.38445	-3.02698	0.00247014	0.0260795	hsa|mt-sRNA|Val|H|1602|tRF-5|28|14A13	hsa|mt-sRNA|Val|H|1602	tRF-5	normal_1_mismatch	Mt_tRNA	H	sense	Val	within gene boundary	1602	1629	1602	1670	14A13
CAGAGTGTCGCTTAACACAAAGCACCCAACTTACACTTAGGAGATTTCAA	14.9201	2.4734	0.977524	2.53027	0.0113974	0.0690014	hsa|mt-sRNA|Val|H|1602|tRF-5|50|8A41	hsa|mt-sRNA|Val|H|1602	tRF-5	normal_1_mismatch	Mt_tRNA	H	sense	Val	within gene boundary	1602	1651	1602	1670	8A41
CAGAGTGTGGCTTAAC	38.9751	3.32427	1.1083	2.99941	0.00270499	0.0279702	hsa|mt-sRNA|Val|H|1602|tRF-5|16|8A7	hsa|mt-sRNA|Val|H|1602	tRF-5	normal_1_mismatch	Mt_tRNA	H	sense	Val	within gene boundary	1602	1617	1602	1670	8A7
CAGCGTGTAGCTTAACACAAAGCACCCA	24.3635	-4.14833	1.42774	-2.90551	0.0036665	0.0345305	hsa|mt-sRNA|Val|H|1602|tRF-5|28|3A24	hsa|mt-sRNA|Val|H|1602	tRF-5	normal_1_mismatch	Mt_tRNA	H	sense	Val	within gene boundary	1602	1629	1602	1670	3A24
CATGCCCCCATGTCTAACAACATGGCTTTCTCACC	20.8663	2.48329	1.05568	2.35231	0.0186573	0.0926399	hsa|mt-sRNA|Ser2|H|12233|tRF-3|35|33A1	hsa|mt-sRNA|Ser2|H|12233	tRF-3	normal_1_mismatch	Mt_tRNA	H	sense	Ser2	within gene boundary	12233	12267	12207	12265	33A1
CATGGCTTTCTCACC	11.4774	2.47896	0.938287	2.642	0.00824182	0.0565663	hsa|mt-sRNA|Ser2|H|12253|tRF-3|15|13A1	hsa|mt-sRNA|Ser2|H|12253	tRF-3	normal_1_mismatch	Mt_tRNA	H	sense	Ser2	within gene boundary	12253	12267	12207	12265	13A1
CATTGGTCGTGGTTGTAGTCC	4.69572	2.59504	1.10773	2.34266	0.0191468	0.0934864	hsa|mt-sRNA|Glu|L|14685|i-tRF-3|21|	hsa|mt-sRNA|Glu|L|14685	i-tRF-3	normal_1_mismatch	Mt_tRNA	L	sense	Glu	within gene boundary	14685	14705	14674	14742
CCATTGGTCTTAGCCCC	14.7872	2.73373	0.987102	2.76945	0.00561516	0.044651	hsa|mt-sRNA|Leu2|H|12288|i-tRF-5|17|13G3	hsa|mt-sRNA|Leu2|H|12288	i-tRF-5	normal_1_mismatch	Mt_tRNA	H	sense	Leu2	within gene boundary	12288	12304	12266	12336	13G3
CCGGAGATGAAAACC	20.0852	4.00669	1.20453	3.32636	0.000879878	0.0138979	hsa|mt-sRNA|Thr|H|15925|i-tRF-3|15|	hsa|mt-sRNA|Thr|H|15925	i-tRF-3	normal_1_mismatch	Mt_tRNA	H	sense	Thr	within gene boundary	15925	15939	15888	15953
CCGGAGATGAAAACCT	15.914	3.55404	0.978374	3.6326	0.000280585	0.00712473	hsa|mt-sRNA|Thr|H|15925|i-tRF-3|16|	hsa|mt-sRNA|Thr|H|15925	i-tRF-3	normal_1_mismatch	Mt_tRNA	H	sense	Thr	within gene boundary	15925	15940	15888	15953
CCTCTTTACAGTGAC	5.81397	2.51184	1.07787	2.33037	0.0197865	0.096106	hsa|mt-sRNA|Lys|H|8351|tRF-3|15|14A0	hsa|mt-sRNA|Lys|H|8351	tRF-3	normal_1_mismatch	Mt_tRNA	H	sense	Lys	within gene boundary	8351	8365	8295	8364	14A0
CCTTTTAAGTTAAAGATTAAGAGAACC	16.5795	2.15316	0.832871	2.58523	0.00973149	0.0623686	hsa|mt-sRNA|Lys|H|8320|i-tRF-5|27|	hsa|mt-sRNA|Lys|H|8320	i-tRF-5	normal_1_mismatch	Mt_tRNA	H	sense	Lys	within gene boundary	8320	8346	8295	8364
CGAAAATGTTGGTTATACC	4.94069	3.71508	1.25672	2.95618	0.00311476	0.0306285	hsa|mt-sRNA|Met|H|4439|i-tRF-3|19|	hsa|mt-sRNA|Met|H|4439	i-tRF-3	normal_1_mismatch	Mt_tRNA	H	sense	Met	within gene boundary	4439	4457	4402	4469
CGGAGATGAAAACCT	10.7758	3.5676	1.01914	3.50059	0.000464223	0.00970033	hsa|mt-sRNA|Thr|H|15926|i-tRF-3|15|	hsa|mt-sRNA|Thr|H|15926	i-tRF-3	normal_1_mismatch	Mt_tRNA	H	sense	Thr	within gene boundary	15926	15940	15888	15953
CGTAAGGTCAGCTAAATAAGCTATCGGGCCC	27.0471	-6.32427	1.5945	-3.96631	7.2995e-05	0.00327247	hsa|mt-sRNA|Met|H|4402|tRF-5|31|0A30	hsa|mt-sRNA|Met|H|4402	tRF-5	normal_1_mismatch	Mt_tRNA	H	sense	Met	within gene boundary	4402	4432	4402	4469	0A30
CTAACAACATGGCTA	55.2017	3.55141	1.14524	3.10102	0.00192856	0.0224924	hsa|mt-sRNA|Ser2|H|12246|i-tRF-3|15|14T0	hsa|mt-sRNA|Ser2|H|12246	i-tRF-3	normal_1_mismatch	Mt_tRNA	H	sense	Ser2	within gene boundary	12246	12260	12207	12265	14T0
CTAACAACATGGCTTTCTCACC	16.6223	2.372	0.909865	2.60698	0.00913442	0.0600775	hsa|mt-sRNA|Ser2|H|12246|tRF-3|22|20A1	hsa|mt-sRNA|Ser2|H|12246	tRF-3	normal_1_mismatch	Mt_tRNA	H	sense	Ser2	within gene boundary	12246	12267	12207	12265	20A1
CTAACTCATGCCCCCATGTCTAACAACATGGCTTTCTCACC	8.18597	3.09003	1.13231	2.72895	0.00635359	0.0479147	hsa|mt-sRNA|Ser2|H|12227|tRF-3|41|39A1	hsa|mt-sRNA|Ser2|H|12227	tRF-3	normal_1_mismatch	Mt_tRNA	H	sense	Ser2	within gene boundary	12227	12267	12207	12265	39A1
CTTTTAAGTTAAAGATTAAGAGAACC	70.5282	2.46845	0.701429	3.51917	0.000432894	0.00923815	hsa|mt-sRNA|Lys|H|8321|i-tRF-5|26|	hsa|mt-sRNA|Lys|H|8321	i-tRF-5	normal_1_mismatch	Mt_tRNA	H	sense	Lys	within gene boundary	8321	8346	8295	8364
CTTTTAAGTTAAAGATTAAGAGAACCAACACCTCTTTACAGTGAC	13.9417	2.67268	1.09007	2.45184	0.0142128	0.0785421	hsa|mt-sRNA|Lys|H|8321|tRF-3|45|44A0	hsa|mt-sRNA|Lys|H|8321	tRF-3	normal_1_mismatch	Mt_tRNA	H	sense	Lys	within gene boundary	8321	8365	8295	8364	44A0
GAAAAAGTCATGGAG	10.0014	-3.24912	0.954793	-3.40295	0.000666616	0.0118339	hsa|mt-sRNA|Ser1|L|7500|tRF-5|15|	hsa|mt-sRNA|Ser1|L|7500	tRF-5	normal_1_mismatch	Mt_tRNA	L	sense	Ser1	within gene boundary	7500	7514	7446	7514
GAAAAAGTCATGGAGGC	124.569	-1.79991	0.712015	-2.52791	0.0114742	0.0690014	hsa|mt-sRNA|Ser1|L|7498|tRF-5|17|	hsa|mt-sRNA|Ser1|L|7498	tRF-5	normal_1_mismatch	Mt_tRNA	L	sense	Ser1	within gene boundary	7498	7514	7446	7514
GAACTGCTAACTCATGCCCCCATGTCTAACAACATGGCTTTCTCACC	27.3044	4.43849	1.12091	3.95971	7.50418e-05	0.00327247	hsa|mt-sRNA|Ser2|H|12221|tRF-3|47|45A1	hsa|mt-sRNA|Ser2|H|12221	tRF-3	normal_1_mismatch	Mt_tRNA	H	sense	Ser2	within gene boundary	12221	12267	12207	12265	45A1
GAATGTTTAGACGGGCTCA	66.6017	2.02361	0.840479	2.40769	0.0160539	0.0853592	hsa|mt-sRNA|Phe|H|613|i-tRF-3|19|0A18	hsa|mt-sRNA|Phe|H|613	i-tRF-3	normal_1_mismatch	Mt_tRNA	H	sense	Phe	within gene boundary	613	631	577	647	0A18
GAATGTTTAGACGGGCTCACATCACCC	22.9306	2.4023	1.0337	2.32398	0.0201268	0.0972877	hsa|mt-sRNA|Phe|H|613|i-tRF-3|27|0A26	hsa|mt-sRNA|Phe|H|613	i-tRF-3	normal_1_mismatch	Mt_tRNA	H	sense	Phe	within gene boundary	613	639	577	647	0A26
GAATGTTTAGACGGGCTCACATCACCCCATAA	58.1229	2.52443	0.912089	2.76775	0.00564449	0.044651	hsa|mt-sRNA|Phe|H|613|tRF-3|32|0A31	hsa|mt-sRNA|Phe|H|613	tRF-3	normal_1_mismatch	Mt_tRNA	H	sense	Phe	within gene boundary	613	644	577	647	0A31
GACGGGCTCACATCACC	18.0255	2.58961	1.007	2.57162	0.0101224	0.0636672	hsa|mt-sRNA|Phe|H|622|i-tRF-3|17|	hsa|mt-sRNA|Phe|H|622	i-tRF-3	normal_1_mismatch	Mt_tRNA	H	sense	Phe	within gene boundary	622	638	577	647
GAGAAAGCTCACAAGAAC	110.236	4.07134	0.853929	4.76778	1.8627e-06	0.000376844	hsa|mt-sRNA|Ser2|H|12207|tRF-5|18|	hsa|mt-sRNA|Ser2|H|12207	tRF-5	normal_1_mismatch	Mt_tRNA	H	sense	Ser2	within gene boundary	12207	12224	12207	12265
GAGAACGCTCACAAGAACTGCTAACTCATGCCCCCATGTCTAACAACATG	12.4451	3.90146	1.21078	3.22228	0.00127176	0.0173548	hsa|mt-sRNA|Ser2|H|12207|tRF-5|50|5A44	hsa|mt-sRNA|Ser2|H|12207	tRF-5	normal_1_mismatch	Mt_tRNA	H	sense	Ser2	within gene boundary	12207	12256	12207	12265	5A44
GAGAGTGTAGCTTAACACAAAGCACCCA	18.9671	-5.62247	1.19847	-4.69139	2.71353e-06	0.00049485	hsa|mt-sRNA|Val|H|1602|tRF-5|28|0C27	hsa|mt-sRNA|Val|H|1602	tRF-5	normal_1_mismatch	Mt_tRNA	H	sense	Val	within gene boundary	1602	1629	1602	1670	0C27
GAGAAAGCTCACAAGACCTG	52.1445	-9.94246	3.38471	-2.93747	0.00330904	0.0317605	hsa|mt-sRNA|Ser2|H|12207|tRF-5|20|16A3	hsa|mt-sRNA|Ser2|H|12207	tRF-5	normal_1_mismatch	Mt_tRNA	H	sense	Ser2	within gene boundary	12207	12226	12207	12265	16A3
GAGAAAGCTCACAAGACCTGCT	16.1227	-7.52339	3.12727	-2.40573	0.01614	0.085427	hsa|mt-sRNA|Ser2|H|12207|tRF-5|22|16A5	hsa|mt-sRNA|Ser2|H|12207	tRF-5	normal_1_mismatch	Mt_tRNA	H	sense	Ser2	within gene boundary	12207	12228	12207	12265	16A5
GAGAAAGCTCACAAGACCTGCTAACT	20.1243	-8.5691	3.38682	-2.53013	0.011402	0.0690014	hsa|mt-sRNA|Ser2|H|12207|tRF-5|26|16A9	hsa|mt-sRNA|Ser2|H|12207	tRF-5	normal_1_mismatch	Mt_tRNA	H	sense	Ser2	within gene boundary	12207	12232	12207	12265	16A9
GAGAAAGCTCACAAGACCTGCTAACTC	44.1348	-9.70206	3.38495	-2.86624	0.00415381	0.0371989	hsa|mt-sRNA|Ser2|H|12207|tRF-5|27|16A10	hsa|mt-sRNA|Ser2|H|12207	tRF-5	normal_1_mismatch	Mt_tRNA	H	sense	Ser2	within gene boundary	12207	12233	12207	12265	16A10
GAGAAAGCTCACAAGACCTGCTAACTCATGCC	21.11	-8.63762	3.38666	-2.55048	0.0107574	0.0667058	hsa|mt-sRNA|Ser2|H|12207|tRF-5|32|16A15	hsa|mt-sRNA|Ser2|H|12207	tRF-5	normal_1_mismatch	Mt_tRNA	H	sense	Ser2	within gene boundary	12207	12238	12207	12265	16A15
GAGAACGCTCACAAGAAC	27.3178	3.10927	1.10914	2.80331	0.00505808	0.0419277	hsa|mt-sRNA|Ser2|H|12207|tRF-5|18|5A12	hsa|mt-sRNA|Ser2|H|12207	tRF-5	normal_1_mismatch	Mt_tRNA	H	sense	Ser2	within gene boundary	12207	12224	12207	12265	5A12
GAGCAAGCTCACAAGAACTGCT	5.68281	-6.02232	1.9883	-3.02888	0.00245463	0.0260795	hsa|mt-sRNA|Ser2|H|12207|tRF-5|22|3A18	hsa|mt-sRNA|Ser2|H|12207	tRF-5	normal_1_mismatch	Mt_tRNA	H	sense	Ser2	within gene boundary	12207	12228	12207	12265	3A18
GAGCAAGCTCACAAGAACTGCTAACT	10.25	-3.75807	1.44826	-2.59488	0.00946229	0.0616899	hsa|mt-sRNA|Ser2|H|12207|tRF-5|26|3A22	hsa|mt-sRNA|Ser2|H|12207	tRF-5	normal_1_mismatch	Mt_tRNA	H	sense	Ser2	within gene boundary	12207	12232	12207	12265	3A22
GCTATCCATTGGTCT	35.6001	3.47613	1.24225	2.79825	0.00513803	0.0419749	hsa|mt-sRNA|Leu2|H|12283|i-tRF-5|15|	hsa|mt-sRNA|Leu2|H|12283	i-tRF-5	normal_1_mismatch	Mt_tRNA	H	sense	Leu2	within gene boundary	12283	12297	12266	12336
GCTCACAAGAACTGCTAACTCATGCCCCCATGTCTAACAACATGGCTTTC	11.133	2.79131	1.15541	2.41585	0.0156983	0.0842004	hsa|mt-sRNA|Ser2|H|12213|tRF-3|50|	hsa|mt-sRNA|Ser2|H|12213	tRF-3	normal_1_mismatch	Mt_tRNA	H	sense	Ser2	within gene boundary	12213	12262	12207	12265
GGAAAAATGGCTGAGTGAAGCATTGGACTGTA	31.0912	-5.63184	1.45261	-3.87704	0.000105736	0.00394441	hsa|mt-sRNA|Tyr|L|5860|tRF-5|32|29A2	hsa|mt-sRNA|Tyr|L|5860	tRF-5	normal_1_mismatch	Mt_tRNA	L	sense	Tyr	within gene boundary	5860	5891	5826	5891	29A2
GGAGATTTCAACTTAACTTGACCGCTCTGACC	183.429	2.29465	0.767764	2.98875	0.00280124	0.0285243	hsa|mt-sRNA|Val|H|1641|tRF-3|32|30G1	hsa|mt-sRNA|Val|H|1641	tRF-3	normal_1_mismatch	Mt_tRNA	H	sense	Val	within gene boundary	1641	1672	1602	1670	30G1
GGCAAAATGGCTGAGTGAAGCATTGGACTGTA	12.6284	-4.60338	1.3378	-3.441	0.000579569	0.0107913	hsa|mt-sRNA|Tyr|L|5860|tRF-5|32|29A2	hsa|mt-sRNA|Tyr|L|5860	tRF-5	normal_1_mismatch	Mt_tRNA	L	sense	Tyr	within gene boundary	5860	5891	5826	5891	29A2
GGACTATGAGAATCGACCCCATCCCTGAGAATCCAAAATTCTCCGTGCCA	3.43981	-5.29067	1.88901	-2.80076	0.00509827	0.0419749	hsa|mt-sRNA|Gln|H|as4332|tRF-5|50|16A33	hsa|mt-sRNA|Gln|H|as4332	tRF-5	normal_1_mismatch	Mt_tRNA	H	anti-sense	Gln	within gene boundary	4332	4381	4329	4400	16A33
GGGAAAATGGCTGAGTGAAGCATTGGACTGTA	40.3592	-6.81584	1.72906	-3.94193	8.08271e-05	0.0033779	hsa|mt-sRNA|Tyr|L|5860|tRF-5|32|29A2	hsa|mt-sRNA|Tyr|L|5860	tRF-5	normal_1_mismatch	Mt_tRNA	L	sense	Tyr	within gene boundary	5860	5891	5826	5891	29A2
GGTAAACTGGCTGAGTGAAGCATTGGACTGTA	132.993	-9.89656	1.79411	-5.51613	3.46551e-08	3.47591e-05	hsa|mt-sRNA|Tyr|L|5860|tRF-5|32|25T6	hsa|mt-sRNA|Tyr|L|5860	tRF-5	normal_1_mismatch	Mt_tRNA	L	sense	Tyr	within gene boundary	5860	5891	5826	5891	25T6
GGTAAAATGGCTGAGTGAAGCATTGGACTGC	16.4041	-2.31078	0.943471	-2.44923	0.014316	0.0786794	hsa|mt-sRNA|Tyr|L|5861|tRF-5|31|0A30	hsa|mt-sRNA|Tyr|L|5861	tRF-5	normal_1_mismatch	Mt_tRNA	L	sense	Tyr	within gene boundary	5861	5891	5826	5891	0A30
GGTAAAATGGCTGAGTGAAGCATTGGACTGTAA	59.9482	-1.95141	0.801192	-2.43563	0.0148658	0.0810045	hsa|mt-sRNA|Tyr|L|5859|tRF-5|33|	hsa|mt-sRNA|Tyr|L|5859	tRF-5	normal_1_mismatch	Mt_tRNA	L	sense	Tyr	within gene boundary	5859	5891	5826	5891
GGTCAAATGGCTGAGTGAAGCATTGGACTGTA	68.182	-9.60776	1.95912	-4.90412	9.38489e-07	0.000346037	hsa|mt-sRNA|Tyr|L|5860|tRF-5|32|28T3	hsa|mt-sRNA|Tyr|L|5860	tRF-5	normal_1_mismatch	Mt_tRNA	L	sense	Tyr	within gene boundary	5860	5891	5826	5891	28T3
GGTAAGGTCAGCTAAATAAGCTATCGGGCCC	28.0386	-4.05769	1.17502	-3.45329	0.000553792	0.0106025	hsa|mt-sRNA|Met|H|4402|tRF-5|31|0A30	hsa|mt-sRNA|Met|H|4402	tRF-5	normal_1_mismatch	Mt_tRNA	H	sense	Met	within gene boundary	4402	4432	4402	4469	0A30
GTCAGCTAAATAAGCTATCGGGCCC	10.8897	4.86736	1.20953	4.02419	5.71728e-05	0.00298576	hsa|mt-sRNA|Met|H|4408|i-tRF-5|25|	hsa|mt-sRNA|Met|H|4408	i-tRF-5	normal_1_mismatch	Mt_tRNA	H	sense	Met	within gene boundary	4408	4432	4402	4469
GTCCTTGTTGTATAAACTAATACACCAG	23.0736	3.82886	1.19235	3.2112	0.00132184	0.017796	hsa|mt-sRNA|Thr|H|15888|tRF-5|28|8A19	hsa|mt-sRNA|Thr|H|15888	tRF-5	normal_1_mismatch	Mt_tRNA	H	sense	Thr	within gene boundary	15888	15915	15888	15953	8A19
GTCCTTGTCGTATAAACT	7.50196	2.82994	1.19267	2.37277	0.0176551	0.0901175	hsa|mt-sRNA|Thr|H|15888|tRF-5|18|8A9	hsa|mt-sRNA|Thr|H|15888	tRF-5	normal_1_mismatch	Mt_tRNA	H	sense	Thr	within gene boundary	15888	15905	15888	15953	8A9
GTGAAAGCTCACAAGAACTG	4.43507	-5.05096	1.56506	-3.22733	0.00124951	0.0171679	hsa|mt-sRNA|Ser2|H|12207|tRF-5|20|1A18	hsa|mt-sRNA|Ser2|H|12207	tRF-5	normal_1_mismatch	Mt_tRNA	H	sense	Ser2	within gene boundary	12207	12226	12207	12265	1A18
GTGGTTGTAGTCCGTGCG	3.715	3.85645	1.4026	2.74949	0.00596875	0.0459222	hsa|mt-sRNA|Glu|L|14680|i-tRF-3|18|	hsa|mt-sRNA|Glu|L|14680	i-tRF-3	normal_1_mismatch	Mt_tRNA	L	sense	Glu	within gene boundary	14680	14697	14674	14742
GTTAAAATGGCAGAGCCC	11.9049	3.35472	0.971616	3.45272	0.000554969	0.0106025	hsa|mt-sRNA|Leu|H|3230|tRF-5|18|5G12	hsa|mt-sRNA|Leu|H|3230	tRF-5	normal_1_mismatch	Mt_tRNA	H	sense	Leu	within gene boundary	3230	3247	3230	3304	5G12
GTTAAAGATTAAGAGAACC	33.689	1.65902	0.670022	2.47607	0.0132836	0.0754869	hsa|mt-sRNA|Lys|H|8328|i-tRF-5|19|	hsa|mt-sRNA|Lys|H|8328	i-tRF-5	normal_1_mismatch	Mt_tRNA	H	sense	Lys	within gene boundary	8328	8346	8295	8364
GTTAAGATGGCAGAGCCCG	32.9513	2.69246	0.930284	2.89424	0.00380079	0.0354623	hsa|mt-sRNA|Leu|H|3230|tRF-5|19|	hsa|mt-sRNA|Leu|H|3230	tRF-5	normal_1_mismatch	Mt_tRNA	H	sense	Leu	within gene boundary	3230	3248	3230	3304
GTTAAGATGGCAGAGCCCGG	89.8655	4.53926	0.976294	4.64948	3.32766e-06	0.000556275	hsa|mt-sRNA|Leu|H|3230|tRF-5|20|	hsa|mt-sRNA|Leu|H|3230	tRF-5	normal_1_mismatch	Mt_tRNA	H	sense	Leu	within gene boundary	3230	3249	3230	3304
GTTAAGATGGCAGAGCCCGGT	100.106	4.28237	0.888936	4.81741	1.45433e-06	0.000376844	hsa|mt-sRNA|Leu|H|3230|tRF-5|21|	hsa|mt-sRNA|Leu|H|3230	tRF-5	normal_1_mismatch	Mt_tRNA	H	sense	Leu	within gene boundary	3230	3250	3230	3304
GTTAAGATGGCAGAGCCCGGTA	29.2426	4.57532	0.878372	5.20886	1.90003e-07	0.000127049	hsa|mt-sRNA|Leu|H|3230|tRF-5|22|	hsa|mt-sRNA|Leu|H|3230	tRF-5	normal_1_mismatch	Mt_tRNA	H	sense	Leu	within gene boundary	3230	3251	3230	3304
GTTAAGATGGCAGAGCCCGGTAA	52.2422	6.18098	1.29687	4.76607	1.87858e-06	0.000376844	hsa|mt-sRNA|Leu|H|3230|tRF-5|23|	hsa|mt-sRNA|Leu|H|3230	tRF-5	normal_1_mismatch	Mt_tRNA	H	sense	Leu	within gene boundary	3230	3252	3230	3304
GTTAAGATGGCAGAGCCCGGTAAT	9.57038	3.6025	1.13355	3.17808	0.00148255	0.0193518	hsa|mt-sRNA|Leu|H|3230|tRF-5|24|	hsa|mt-sRNA|Leu|H|3230	tRF-5	normal_1_mismatch	Mt_tRNA	H	sense	Leu	within gene boundary	3230	3253	3230	3304
GTTAAGATGGCAGAGCCCGGTAATC	17.4483	2.983	0.827259	3.60588	0.000311094	0.00761042	hsa|mt-sRNA|Leu|H|3230|tRF-5|25|	hsa|mt-sRNA|Leu|H|3230	tRF-5	normal_1_mismatch	Mt_tRNA	H	sense	Leu	within gene boundary	3230	3254	3230	3304
GTTAAGATGGCAGAGCCCGGTAATCG	11.0619	3.95398	1.08415	3.6471	0.000265218	0.006879	hsa|mt-sRNA|Leu|H|3230|tRF-5|26|	hsa|mt-sRNA|Leu|H|3230	tRF-5	normal_1_mismatch	Mt_tRNA	H	sense	Leu	within gene boundary	3230	3255	3230	3304
GTTAAGATGGCAGAGCCCGGTAATCGCAT	17.4252	2.41284	0.769242	3.13664	0.00170894	0.0205278	hsa|mt-sRNA|Leu|H|3230|tRF-5|29|	hsa|mt-sRNA|Leu|H|3230	tRF-5	normal_1_mismatch	Mt_tRNA	H	sense	Leu	within gene boundary	3230	3258	3230	3304
GTTAAGATGGCAGAGCCCGGTAATCGCATAA	34.4063	2.11321	0.630754	3.3503	0.000807246	0.013738	hsa|mt-sRNA|Leu|H|3230|tRF-5|31|	hsa|mt-sRNA|Leu|H|3230	tRF-5	normal_1_mismatch	Mt_tRNA	H	sense	Leu	within gene boundary	3230	3260	3230	3304
GTTAAGATGGCAGAGCCCGGTAATCGCATAAAA	30.5588	1.8098	0.700577	2.58331	0.00978586	0.0625173	hsa|mt-sRNA|Leu|H|3230|tRF-5|33|	hsa|mt-sRNA|Leu|H|3230	tRF-5	normal_1_mismatch	Mt_tRNA	H	sense	Leu	within gene boundary	3230	3262	3230	3304
GTTAAGATTGCAGAGCCCGGTAATCGCATAAAACTTAAAACT	31.9054	1.50264	0.622642	2.41334	0.0158072	0.0845582	hsa|mt-sRNA|Leu|H|3230|tRF-5|42|8G33	hsa|mt-sRNA|Leu|H|3230	tRF-5	normal_1_mismatch	Mt_tRNA	H	sense	Leu	within gene boundary	3230	3271	3230	3304	8G33
GTTAAGCTGGCAGAGCCCGGTAATCGCATAAAACTTAAAACT	2.35402	-5.48773	2.07333	-2.64682	0.00812521	0.056204	hsa|mt-sRNA|Leu|H|3230|tRF-5|42|6A35	hsa|mt-sRNA|Leu|H|3230	tRF-5	normal_1_mismatch	Mt_tRNA	H	sense	Leu	within gene boundary	3230	3271	3230	3304	6A35
GTTAAGATGGCAGAGCCCGGTAATCGCATAAAACTTAAAAC	15.0007	1.61496	0.665902	2.42522	0.0152989	0.082499	hsa|mt-sRNA|Leu|H|3230|tRF-5|41|	hsa|mt-sRNA|Leu|H|3230	tRF-5	normal_1_mismatch	Mt_tRNA	H	sense	Leu	within gene boundary	3230	3270	3230	3304
GTTAAGATGGCAGAGCCCGGTAATCGCATAAAACTTAAAACTTT	31.3667	1.78391	0.619582	2.87921	0.0039867	0.0363515	hsa|mt-sRNA|Leu|H|3230|tRF-5|44|	hsa|mt-sRNA|Leu|H|3230	tRF-5	normal_1_mismatch	Mt_tRNA	H	sense	Leu	within gene boundary	3230	3273	3230	3304
GTTAAGATGGCAGAGCCCGGTAATCGCATAAAACTTAAAACTTTA	20.4231	2.36166	0.735329	3.21171	0.00131947	0.017796	hsa|mt-sRNA|Leu|H|3230|tRF-5|45|	hsa|mt-sRNA|Leu|H|3230	tRF-5	normal_1_mismatch	Mt_tRNA	H	sense	Leu	within gene boundary	3230	3274	3230	3304
GTTAAGATGGCAGAGCCCGGTAATCGCATAAAACTTAAAACTTTACAGTC	10.1303	2.30787	0.811811	2.84287	0.00447093	0.0388255	hsa|mt-sRNA|Leu|H|3230|tRF-5|50|	hsa|mt-sRNA|Leu|H|3230	tRF-5	normal_1_mismatch	Mt_tRNA	H	sense	Leu	within gene boundary	3230	3279	3230	3304
GTTAAGATGGCAGAGCCCGGTAATCGCATAAACCTTA	11.2202	2.48442	1.05058	2.36482	0.0180389	0.0906917	hsa|mt-sRNA|Leu|H|3230|tRH-5|37|32A4	hsa|mt-sRNA|Leu|H|3230	tRNA-half-5	normal_1_mismatch	Mt_tRNA	H	sense	Leu	within gene boundary	3230	3266	3230	3304	32A4
GTTCTTGTAGTTGAAATACAACG	21.9248	-2.26648	0.796388	-2.84595	0.00442786	0.0386187	hsa|mt-sRNA|Glu|L|14720|tRF-5|23|	hsa|mt-sRNA|Glu|L|14720	tRF-5	normal_1_mismatch	Mt_tRNA	L	sense	Glu	within gene boundary	14720	14742	14674	14742
GTTCTTGTAGTTGAAATACAACGATGGTTTTTCATATCATTGGTCGTCGT	11.8022	2.74935	0.980713	2.80342	0.0050564	0.0419277	hsa|mt-sRNA|Glu|L|14693|tRF-5|50|2C47	hsa|mt-sRNA|Glu|L|14693	tRF-5	normal_1_mismatch	Mt_tRNA	L	sense	Glu	within gene boundary	14693	14742	14674	14742	2C47
GTTCTTGTCGTTGAAATACAACGATGGTTTTTCATATCATTGGTCGTGGT	7.46116	3.52977	1.11274	3.17216	0.0015131	0.0194569	hsa|mt-sRNA|Glu|L|14693|tRF-5|50|41T8	hsa|mt-sRNA|Glu|L|14693	tRF-5	normal_1_mismatch	Mt_tRNA	L	sense	Glu	within gene boundary	14693	14742	14674	14742	41T8
GTTCTTGTTGTTGAAATACAACGATGGTTTTTCATATCATTGGTCGTGGT	366.354	2.03878	0.723149	2.81931	0.00481269	0.0408823	hsa|mt-sRNA|Glu|L|14693|tRF-5|50|41T8	hsa|mt-sRNA|Glu|L|14693	tRF-5	normal_1_mismatch	Mt_tRNA	L	sense	Glu	within gene boundary	14693	14742	14674	14742	41T8
GTTCTTGTGGTTGAAATACAACGATGGTTTTTCATATCATTGGTCGTGGT	83.0958	2.21025	0.738443	2.99312	0.00276139	0.028262	hsa|mt-sRNA|Glu|L|14693|tRF-5|50|41T8	hsa|mt-sRNA|Glu|L|14693	tRF-5	normal_1_mismatch	Mt_tRNA	L	sense	Glu	within gene boundary	14693	14742	14674	14742	41T8
GTTTAGACGGGCTCA	163.272	4.15565	1.16794	3.55811	0.000373532	0.00851483	hsa|mt-sRNA|Phe|H|617|i-tRF-3|15|	hsa|mt-sRNA|Phe|H|617	i-tRF-3	normal_1_mismatch	Mt_tRNA	H	sense	Phe	within gene boundary	617	631	577	647
GTTTAGACGGGCTCAC	537.888	3.39835	0.919364	3.69642	0.000218664	0.00617804	hsa|mt-sRNA|Phe|H|617|i-tRF-3|16|	hsa|mt-sRNA|Phe|H|617	i-tRF-3	normal_1_mismatch	Mt_tRNA	H	sense	Phe	within gene boundary	617	632	577	647
GTTTAGACGGGCTCACA	133.239	3.33625	0.981979	3.39748	0.000680099	0.0119674	hsa|mt-sRNA|Phe|H|617|i-tRF-3|17|	hsa|mt-sRNA|Phe|H|617	i-tRF-3	normal_1_mismatch	Mt_tRNA	H	sense	Phe	within gene boundary	617	633	577	647
GTTTAGACGGGCTCACAT	55.4637	2.87506	0.937434	3.06695	0.00216258	0.0243715	hsa|mt-sRNA|Phe|H|617|i-tRF-3|18|	hsa|mt-sRNA|Phe|H|617	i-tRF-3	normal_1_mismatch	Mt_tRNA	H	sense	Phe	within gene boundary	617	634	577	647
GTTTAGACGGGCTCACATCACC	11.3259	3.13022	1.18655	2.63808	0.00833773	0.0568894	hsa|mt-sRNA|Phe|H|617|i-tRF-3|22|	hsa|mt-sRNA|Phe|H|617	i-tRF-3	normal_1_mismatch	Mt_tRNA	H	sense	Phe	within gene boundary	617	638	577	647
GTTTAGACGGGCTCACATCACCCCA	20.9552	4.22648	1.42378	2.9685	0.00299257	0.0298661	hsa|mt-sRNA|Phe|H|617|i-tRF-3|25|	hsa|mt-sRNA|Phe|H|617	i-tRF-3	normal_1_mismatch	Mt_tRNA	H	sense	Phe	within gene boundary	617	641	577	647
GTTTAGACGGGCTCACATCACCCCATAA	40.1934	3.42338	1.32027	2.59294	0.00951589	0.0616899	hsa|mt-sRNA|Phe|H|617|tRF-3|28|	hsa|mt-sRNA|Phe|H|617	tRF-3	normal_1_mismatch	Mt_tRNA	H	sense	Phe	within gene boundary	617	644	577	647
GTTTAGACGGGCTCACATCACCCCATAAA	68.784	3.3607	1.07726	3.11968	0.00181049	0.0214902	hsa|mt-sRNA|Phe|H|617|tRF-3|29|	hsa|mt-sRNA|Phe|H|617	tRF-3	normal_1_mismatch	Mt_tRNA	H	sense	Phe	within gene boundary	617	645	577	647
GTTTATGTTGCTTACCT	8.40164	2.22998	0.84782	2.63025	0.00853228	0.0578235	hsa|mt-sRNA|Phe|H|577|tRF-5|17|8A8	hsa|mt-sRNA|Phe|H|577	tRF-5	normal_1_mismatch	Mt_tRNA	H	sense	Phe	within gene boundary	577	593	577	647	8A8
GTTTATGTTGCTTACCTC	11.929	3.03691	0.994118	3.05488	0.00225151	0.0249098	hsa|mt-sRNA|Phe|H|577|tRF-5|18|8A9	hsa|mt-sRNA|Phe|H|577	tRF-5	normal_1_mismatch	Mt_tRNA	H	sense	Phe	within gene boundary	577	594	577	647	8A9
GTTTATGTTGCTTACCTCC	20.1911	2.36982	0.742559	3.19143	0.00141571	0.0188074	hsa|mt-sRNA|Phe|H|577|tRF-5|19|8A10	hsa|mt-sRNA|Phe|H|577	tRF-5	normal_1_mismatch	Mt_tRNA	H	sense	Phe	within gene boundary	577	595	577	647	8A10
GTTTATGTTGCTTACCTCCT	44.7026	2.39597	0.700091	3.42237	0.000620777	0.0112187	hsa|mt-sRNA|Phe|H|577|tRF-5|20|8A11	hsa|mt-sRNA|Phe|H|577	tRF-5	normal_1_mismatch	Mt_tRNA	H	sense	Phe	within gene boundary	577	596	577	647	8A11
GTTTATGTAGCTTACC	58.7776	2.50378	0.832323	3.00819	0.0026281	0.0275501	hsa|mt-sRNA|Phe|H|577|tRF-5|16|	hsa|mt-sRNA|Phe|H|577	tRF-5	normal_1_mismatch	Mt_tRNA	H	sense	Phe	within gene boundary	577	592	577	647
GTTTATGTAGCTTACCTCC	24.5524	2.15211	0.701456	3.06806	0.00215455	0.0243715	hsa|mt-sRNA|Phe|H|577|tRF-5|19|	hsa|mt-sRNA|Phe|H|577	tRF-5	normal_1_mismatch	Mt_tRNA	H	sense	Phe	within gene boundary	577	595	577	647
GTTTATGTAGCTTACCTCCT	46.9125	1.80889	0.663492	2.72632	0.00640441	0.0479375	hsa|mt-sRNA|Phe|H|577|tRF-5|20|	hsa|mt-sRNA|Phe|H|577	tRF-5	normal_1_mismatch	Mt_tRNA	H	sense	Phe	within gene boundary	577	596	577	647
GTTTATGTGGCTTACCTCCT	11.6315	2.5536	1.05966	2.40982	0.0159605	0.0851511	hsa|mt-sRNA|Phe|H|577|tRF-5|20|8A11	hsa|mt-sRNA|Phe|H|577	tRF-5	normal_1_mismatch	Mt_tRNA	H	sense	Phe	within gene boundary	577	596	577	647	8A11
GTTTATGTTGCTTACC	9.8902	4.00913	1.15923	3.45845	0.0005433	0.0105812	hsa|mt-sRNA|Phe|H|577|tRF-5|16|8A7	hsa|mt-sRNA|Phe|H|577	tRF-5	normal_1_mismatch	Mt_tRNA	H	sense	Phe	within gene boundary	577	592	577	647	8A7
TAACAGCTAAGGACTG	16.7307	-3.01689	0.827699	-3.64492	0.000267478	0.006879	hsa|mt-sRNA|Ala|H|as5580|i-tRF-5|16|	hsa|mt-sRNA|Ala|H|as5580	i-tRF-5	normal_1_mismatch	Mt_tRNA	H	anti-sense	Ala	overlap gene boundary	5580	5595	5587	5655
TAACAGCTAAGGACTGCAAAACCCCACT	78.1389	-1.09254	0.460314	-2.37346	0.0176223	0.0901175	hsa|mt-sRNA|Ala|H|as5580|i-tRF-5|28|	hsa|mt-sRNA|Ala|H|as5580	i-tRF-5	normal_1_mismatch	Mt_tRNA	H	anti-sense	Ala	overlap gene boundary	5580	5607	5587	5655
TAAGATGGCAGAGCCC	12.5607	3.56729	1.09932	3.24499	0.00117456	0.0168298	hsa|mt-sRNA|Leu|H|3232|tRF-5|16|	hsa|mt-sRNA|Leu|H|3232	tRF-5	normal_1_mismatch	Mt_tRNA	H	sense	Leu	within gene boundary	3232	3247	3230	3304
TAAGGTCAGCTAAATAAGCTATCGGGCC	14.6978	4.22391	1.05213	4.01464	5.95367e-05	0.00298576	hsa|mt-sRNA|Met|H|4404|tRF-5|28|	hsa|mt-sRNA|Met|H|4404	tRF-5	normal_1_mismatch	Mt_tRNA	H	sense	Met	within gene boundary	4404	4431	4402	4469
TAAGGTCAGCTAAATAAGCTATCGGGCCC	22.5381	3.97447	0.931393	4.26723	1.97914e-05	0.00165423	hsa|mt-sRNA|Met|H|4404|tRF-5|29|	hsa|mt-sRNA|Met|H|4404	tRF-5	normal_1_mismatch	Mt_tRNA	H	sense	Met	within gene boundary	4404	4432	4402	4469
TAAGCTATCGGGCCCATACCCCGAAAATGTTGGA	48.7881	-1.67987	0.625656	-2.68498	0.00725338	0.0521352	hsa|mt-sRNA|Met|H|4418|i-tRF-5|34|33T0	hsa|mt-sRNA|Met|H|4418	i-tRF-5	normal_1_mismatch	Mt_tRNA	H	sense	Met	within gene boundary	4418	4451	4402	4469	33T0
TAGACGGGCTCACATC	31.3481	3.48282	1.07247	3.24747	0.00116438	0.0168186	hsa|mt-sRNA|Phe|H|620|i-tRF-3|16|	hsa|mt-sRNA|Phe|H|620	i-tRF-3	normal_1_mismatch	Mt_tRNA	H	sense	Phe	within gene boundary	620	635	577	647
TAGACGGGCTCACATCACC	134.644	3.24854	1.04478	3.10931	0.00187523	0.0219983	hsa|mt-sRNA|Phe|H|620|i-tRF-3|19|	hsa|mt-sRNA|Phe|H|620	i-tRF-3	normal_1_mismatch	Mt_tRNA	H	sense	Phe	within gene boundary	620	638	577	647
TAGACGGGCTCACATCACCC	62.224	3.77369	1.23642	3.0521	0.00227243	0.0249098	hsa|mt-sRNA|Phe|H|620|i-tRF-3|20|	hsa|mt-sRNA|Phe|H|620	i-tRF-3	normal_1_mismatch	Mt_tRNA	H	sense	Phe	within gene boundary	620	639	577	647
TAGATTGAGGCCAGTTGATTAGGGTGCTTAGCTGTTAACT	23.9683	-2.787	0.668075	-4.17168	3.02356e-05	0.00233279	hsa|mt-sRNA|Asn|L|5690|tRF-5|40|31T8	hsa|mt-sRNA|Asn|L|5690	tRF-5	normal_1_mismatch	Mt_tRNA	L	sense	Asn	within gene boundary	5690	5729	5657	5729	31T8
TAGGAGCTTAAACCC	237.395	2.43188	1.02268	2.37795	0.0174091	0.0897753	hsa|mt-sRNA|Ile|H|4306|i-tRF-3|15|	hsa|mt-sRNA|Ile|H|4306	i-tRF-3	normal_1_mismatch	Mt_tRNA	H	sense	Ile	within gene boundary	4306	4320	4263	4331
TAGGAGCTTAAACCCC	47.1439	2.6253	0.844174	3.1099	0.00187151	0.0219983	hsa|mt-sRNA|Ile|H|4306|i-tRF-3|16|	hsa|mt-sRNA|Ile|H|4306	i-tRF-3	normal_1_mismatch	Mt_tRNA	H	sense	Ile	within gene boundary	4306	4321	4263	4331
TAGGAGCTTAAACCCCC	14.9133	2.60016	1.02919	2.52642	0.0115232	0.0690014	hsa|mt-sRNA|Ile|H|4306|i-tRF-3|17|	hsa|mt-sRNA|Ile|H|4306	i-tRF-3	normal_1_mismatch	Mt_tRNA	H	sense	Ile	within gene boundary	4306	4322	4263	4331
TAGGATGGGGTGTGAT	143.109	2.51249	0.989674	2.5387	0.0111264	0.0682558	hsa|mt-sRNA|Gln|L|4385|tRF-5|16|	hsa|mt-sRNA|Gln|L|4385	tRF-5	normal_1_mismatch	Mt_tRNA	L	sense	Gln	within gene boundary	4385	4400	4329	4400
TAGGATGGGGTGTGATAGGTGGCACGGAGAA	79.9522	-1.43274	0.614787	-2.33046	0.0197816	0.096106	hsa|mt-sRNA|Gln|L|4370|tRF-5|31|	hsa|mt-sRNA|Gln|L|4370	tRF-5	normal_1_mismatch	Mt_tRNA	L	sense	Gln	within gene boundary	4370	4400	4329	4400
TAGGATGGGGTGTGATAGGTGGCACGGAGAAT	147.152	-1.77156	0.672501	-2.63429	0.00843139	0.0573335	hsa|mt-sRNA|Gln|L|4369|tRF-5|32|	hsa|mt-sRNA|Gln|L|4369	tRF-5	normal_1_mismatch	Mt_tRNA	L	sense	Gln	within gene boundary	4369	4400	4329	4400
TAGGATGGGGTGTGATAGGTGGCACGGAGAATTA	252.374	-2.90378	0.651147	-4.45949	8.21564e-06	0.000969445	hsa|mt-sRNA|Gln|L|4367|tRF-5|34|0A33	hsa|mt-sRNA|Gln|L|4367	tRF-5	normal_1_mismatch	Mt_tRNA	L	sense	Gln	within gene boundary	4367	4400	4329	4400	0A33
TAGGATGGGGTGTGATAGGTGGCACGGAGAATTT	130.168	-1.6882	0.629291	-2.6827	0.00730309	0.0521352	hsa|mt-sRNA|Gln|L|4367|tRF-5|34|	hsa|mt-sRNA|Gln|L|4367	tRF-5	normal_1_mismatch	Mt_tRNA	L	sense	Gln	within gene boundary	4367	4400	4329	4400
TAGGATGGGGTGTGATAGGTGGCACGGAGAATTTA	64.1459	-2.45259	0.613806	-3.99571	6.45016e-05	0.00308072	hsa|mt-sRNA|Gln|L|4366|tRF-5|35|0A34	hsa|mt-sRNA|Gln|L|4366	tRF-5	normal_1_mismatch	Mt_tRNA	L	sense	Gln	within gene boundary	4366	4400	4329	4400	0A34
TAGGATGGGGTGTGATAGGTGGCACGGAGAATTTT	259.092	-1.99494	0.734942	-2.71442	0.00663927	0.0489646	hsa|mt-sRNA|Gln|L|4366|tRF-5|35|	hsa|mt-sRNA|Gln|L|4366	tRF-5	normal_1_mismatch	Mt_tRNA	L	sense	Gln	within gene boundary	4366	4400	4329	4400
TAGGATGGGGTGTGATAGGTGGCACGGAGAATTTTA	680.453	-2.94561	0.846834	-3.47838	0.000504454	0.0102216	hsa|mt-sRNA|Gln|L|4365|tRF-5|36|0C35	hsa|mt-sRNA|Gln|L|4365	tRF-5	normal_1_mismatch	Mt_tRNA	L	sense	Gln	within gene boundary	4365	4400	4329	4400	0C35
TAGGATGGGGTGTGATAGGTGGCACGGAGAATTTTGA	1867.59	-3.09909	0.789443	-3.92566	8.64915e-05	0.00344961	hsa|mt-sRNA|Gln|L|4364|tRF-5|37|0C36	hsa|mt-sRNA|Gln|L|4364	tRF-5	normal_1_mismatch	Mt_tRNA	L	sense	Gln	within gene boundary	4364	4400	4329	4400	0C36
TAGGATGGGGTGTGATAGGTGGCACGGAGAATTTTGAA	103.337	-3.16351	0.798601	-3.96131	7.45384e-05	0.00327247	hsa|mt-sRNA|Gln|L|4363|tRF-5|38|1C36	hsa|mt-sRNA|Gln|L|4363	tRF-5	normal_1_mismatch	Mt_tRNA	L	sense	Gln	within gene boundary	4363	4400	4329	4400	1C36
TAGGATGGGGTGTGATAGGTGGCACGGAGCATTTTG	14.3217	4.02566	1.17096	3.43791	0.000586214	0.0107913	hsa|mt-sRNA|Gln|L|4365|tRF-5|36|6T29	hsa|mt-sRNA|Gln|L|4365	tRF-5	normal_1_mismatch	Mt_tRNA	L	sense	Gln	within gene boundary	4365	4400	4329	4400	6T29
TAGGATGGGGTGTGATCGGTGGCACGGAGAATTTTG	21.4625	-8.66154	3.38661	-2.55758	0.0105402	0.0656635	hsa|mt-sRNA|Gln|L|4365|tRF-5|36|19T16	hsa|mt-sRNA|Gln|L|4365	tRF-5	normal_1_mismatch	Mt_tRNA	L	sense	Gln	within gene boundary	4365	4400	4329	4400	19T16
TAGGATGGGGTGTGCTAGGTGGCACGGAGAATTTTG	18.4372	-8.44228	3.38714	-2.49245	0.0126864	0.073708	hsa|mt-sRNA|Gln|L|4365|tRF-5|36|21T14	hsa|mt-sRNA|Gln|L|4365	tRF-5	normal_1_mismatch	Mt_tRNA	L	sense	Gln	within gene boundary	4365	4400	4329	4400	21T14
TCAACTTAACTTGACCGCTCTGACC	67.5692	-2.72139	1.05041	-2.59079	0.00957552	0.0617636	hsa|mt-sRNA|Val|H|1648|tRF-3|25|23G1	hsa|mt-sRNA|Val|H|1648	tRF-3	normal_1_mismatch	Mt_tRNA	H	sense	Val	within gene boundary	1648	1672	1602	1670	23G1
TCACATCACCCCATAA	19.597	3.42056	1.44871	2.36111	0.0182204	0.0911793	hsa|mt-sRNA|Phe|H|629|tRF-3|16|	hsa|mt-sRNA|Phe|H|629	tRF-3	normal_1_mismatch	Mt_tRNA	H	sense	Phe	within gene boundary	629	644	577	647
TCACAAGAACTGCTAAC	11.0212	3.01709	1.16298	2.59429	0.00947877	0.0616899	hsa|mt-sRNA|Ser2|H|12215|i-tRF-5|17|	hsa|mt-sRNA|Ser2|H|12215	i-tRF-5	normal_1_mismatch	Mt_tRNA	H	sense	Ser2	within gene boundary	12215	12231	12207	12265
TCACAAGAACTGCTAACTCATGCCCCCATGTCTAACAACATGGCTTTCTT	14.3063	4.24948	1.31075	3.24203	0.00118682	0.0168849	hsa|mt-sRNA|Ser2|H|12215|tRF-3|50|49C0	hsa|mt-sRNA|Ser2|H|12215	tRF-3	normal_1_mismatch	Mt_tRNA	H	sense	Ser2	within gene boundary	12215	12264	12207	12265	49C0
TGAATCTGACAACAGAGGCTTACGACCCCTTCTTTACC	20.1517	5.30939	1.45068	3.65993	0.000252282	0.00683889	hsa|mt-sRNA|His|H|12169|tRF-3|38|31A6	hsa|mt-sRNA|His|H|12169	tRF-3	normal_1_mismatch	Mt_tRNA	H	sense	His	within gene boundary	12169	12206	12138	12206	31A6
TGAATCTGACAACAGAGGCTTACGACCCCTTTTTTACC	5.04792	5.07153	1.88984	2.68357	0.00728397	0.0521352	hsa|mt-sRNA|His|H|12169|tRF-3|38|31A6	hsa|mt-sRNA|His|H|12169	tRF-3	normal_1_mismatch	Mt_tRNA	H	sense	His	within gene boundary	12169	12206	12138	12206	31A6
TGGTCGTGGTTGTAGTC	7.55727	3.02338	1.21338	2.4917	0.0127133	0.073708	hsa|mt-sRNA|Glu|L|14686|i-tRF-3|17|	hsa|mt-sRNA|Glu|L|14686	i-tRF-3	normal_1_mismatch	Mt_tRNA	L	sense	Glu	within gene boundary	14686	14702	14674	14742
TGGTCGTGGTTGTAGTCC	12.6523	2.39657	0.914666	2.62016	0.00878886	0.0593618	hsa|mt-sRNA|Glu|L|14685|i-tRF-3|18|	hsa|mt-sRNA|Glu|L|14685	i-tRF-3	normal_1_mismatch	Mt_tRNA	L	sense	Glu	within gene boundary	14685	14702	14674	14742
TGTTTAGACGGGCTC	835.631	3.53738	1.07144	3.30154	0.000961568	0.0148377	hsa|mt-sRNA|Phe|H|616|i-tRF-3|15|	hsa|mt-sRNA|Phe|H|616	i-tRF-3	normal_1_mismatch	Mt_tRNA	H	sense	Phe	within gene boundary	616	630	577	647
TGTTTAGACGGGCTCA	90.5126	3.53538	0.992126	3.56344	0.000366033	0.00843979	hsa|mt-sRNA|Phe|H|616|i-tRF-3|16|	hsa|mt-sRNA|Phe|H|616	i-tRF-3	normal_1_mismatch	Mt_tRNA	H	sense	Phe	within gene boundary	616	631	577	647
TGTTTAGACGGGCTCACA	107.094	2.37702	0.916872	2.59253	0.00952723	0.0616899	hsa|mt-sRNA|Phe|H|616|i-tRF-3|18|	hsa|mt-sRNA|Phe|H|616	i-tRF-3	normal_1_mismatch	Mt_tRNA	H	sense	Phe	within gene boundary	616	633	577	647
TGTTTAGACGGGCTCACATCACCC	31.4371	4.59181	1.28667	3.56877	0.000358668	0.00836613	hsa|mt-sRNA|Phe|H|616|i-tRF-3|24|	hsa|mt-sRNA|Phe|H|616	i-tRF-3	normal_1_mismatch	Mt_tRNA	H	sense	Phe	within gene boundary	616	639	577	647
TGTTTAGACGGGCTCACATCACCCC	7.27288	3.14737	1.34201	2.34526	0.0190138	0.0934846	hsa|mt-sRNA|Phe|H|616|i-tRF-3|25|	hsa|mt-sRNA|Phe|H|616	i-tRF-3	normal_1_mismatch	Mt_tRNA	H	sense	Phe	within gene boundary	616	640	577	647
TGTTTAGACGGGCTCACATCACCCCA	28.4971	4.00739	1.23168	3.25361	0.0011395	0.0168076	hsa|mt-sRNA|Phe|H|616|i-tRF-3|26|	hsa|mt-sRNA|Phe|H|616	i-tRF-3	normal_1_mismatch	Mt_tRNA	H	sense	Phe	within gene boundary	616	641	577	647
TGTTTAGACGGGCTCACATCACCCCATA	12.9864	3.01057	1.18465	2.54132	0.0110435	0.0681638	hsa|mt-sRNA|Phe|H|616|i-tRF-3|28|	hsa|mt-sRNA|Phe|H|616	i-tRF-3	normal_1_mismatch	Mt_tRNA	H	sense	Phe	within gene boundary	616	643	577	647
TGTTTAGACGGGCTCACATCACCCCATAAA	55.2669	2.94573	0.971199	3.03309	0.00242063	0.0260795	hsa|mt-sRNA|Phe|H|616|tRF-3|30|	hsa|mt-sRNA|Phe|H|616	tRF-3	normal_1_mismatch	Mt_tRNA	H	sense	Phe	within gene boundary	616	645	577	647
TGTTTCGACGGGCTCA	23.885	4.03213	1.33157	3.0281	0.00246096	0.0260795	hsa|mt-sRNA|Phe|H|616|i-tRF-3|16|5A10	hsa|mt-sRNA|Phe|H|616	i-tRF-3	normal_1_mismatch	Mt_tRNA	H	sense	Phe	within gene boundary	616	631	577	647	5A10
TTAACTTGACCGCTC	17.871	3.33551	1.22779	2.71667	0.00659419	0.0488116	hsa|mt-sRNA|Val|H|1653|tRF-3|15|	hsa|mt-sRNA|Val|H|1653	tRF-3	normal_1_mismatch	Mt_tRNA	H	sense	Val	within gene boundary	1653	1667	1602	1670
TTAGACGGGCTCACA	39.6368	3.92058	1.11247	3.52422	0.000424736	0.00923815	hsa|mt-sRNA|Phe|H|619|i-tRF-3|15|	hsa|mt-sRNA|Phe|H|619	i-tRF-3	normal_1_mismatch	Mt_tRNA	H	sense	Phe	within gene boundary	619	633	577	647
TTAGACGGGCTCACATC	28.8576	3.86769	1.19779	3.22903	0.00124209	0.0171679	hsa|mt-sRNA|Phe|H|619|i-tRF-3|17|	hsa|mt-sRNA|Phe|H|619	i-tRF-3	normal_1_mismatch	Mt_tRNA	H	sense	Phe	within gene boundary	619	635	577	647
TTAGACGGGCTCACATCACC	90.432	3.94145	1.1168	3.52923	0.000416764	0.00918712	hsa|mt-sRNA|Phe|H|619|i-tRF-3|20|	hsa|mt-sRNA|Phe|H|619	i-tRF-3	normal_1_mismatch	Mt_tRNA	H	sense	Phe	within gene boundary	619	638	577	647
TTAGACGGGCTCACATCACCC	45.1163	4.81198	1.28696	3.73902	0.000184737	0.00563461	hsa|mt-sRNA|Phe|H|619|i-tRF-3|21|	hsa|mt-sRNA|Phe|H|619	i-tRF-3	normal_1_mismatch	Mt_tRNA	H	sense	Phe	within gene boundary	619	639	577	647
TTAGACGGGCTCACATCACCCC	10.8078	5.3644	1.48604	3.60986	0.00030636	0.00758714	hsa|mt-sRNA|Phe|H|619|i-tRF-3|22|	hsa|mt-sRNA|Phe|H|619	i-tRF-3	normal_1_mismatch	Mt_tRNA	H	sense	Phe	within gene boundary	619	640	577	647
TTAGACGGGCTCACATCACCCCA	14.3815	4.35356	1.5581	2.79414	0.0052038	0.0422624	hsa|mt-sRNA|Phe|H|619|i-tRF-3|23|	hsa|mt-sRNA|Phe|H|619	i-tRF-3	normal_1_mismatch	Mt_tRNA	H	sense	Phe	within gene boundary	619	641	577	647
TTAGACGGGCTCACATCACCCCATA	9.47705	3.88334	1.26818	3.06213	0.00219768	0.0246287	hsa|mt-sRNA|Phe|H|619|i-tRF-3|25|	hsa|mt-sRNA|Phe|H|619	i-tRF-3	normal_1_mismatch	Mt_tRNA	H	sense	Phe	within gene boundary	619	643	577	647
TTAGACGGGCTCACATCACCCCATAA	35.0986	3.67435	1.40881	2.60812	0.00910412	0.0600775	hsa|mt-sRNA|Phe|H|619|tRF-3|26|	hsa|mt-sRNA|Phe|H|619	tRF-3	normal_1_mismatch	Mt_tRNA	H	sense	Phe	within gene boundary	619	644	577	647
TTAGACGGGCTCACATCACCCCATAAA	11.4605	3.85944	1.25101	3.08507	0.00203501	0.0234611	hsa|mt-sRNA|Phe|H|619|tRF-3|27|	hsa|mt-sRNA|Phe|H|619	tRF-3	normal_1_mismatch	Mt_tRNA	H	sense	Phe	within gene boundary	619	645	577	647
TTGGTCGTGGTTGTAGTCCGTGCGAGAATC	8.84558	5.86573	1.41238	4.15307	3.28039e-05	0.00235016	hsa|mt-sRNA|Glu|L|14674|tRF-3|30|0T29	hsa|mt-sRNA|Glu|L|14674	tRF-3	normal_1_mismatch	Mt_tRNA	L	sense	Glu	within gene boundary	14674	14703	14674	14742	0T29
TTGGTCGTGGTTGTAGT	13.7184	3.1355	1.15605	2.71224	0.00668295	0.0491062	hsa|mt-sRNA|Glu|L|14687|i-tRF-3|17|	hsa|mt-sRNA|Glu|L|14687	i-tRF-3	normal_1_mismatch	Mt_tRNA	L	sense	Glu	within gene boundary	14687	14703	14674	14742
TTGGTCGTGGTTGTAGTCC	30.0205	2.16951	0.919671	2.359	0.018324	0.0914379	hsa|mt-sRNA|Glu|L|14685|i-tRF-3|19|	hsa|mt-sRNA|Glu|L|14685	i-tRF-3	normal_1_mismatch	Mt_tRNA	L	sense	Glu	within gene boundary	14685	14703	14674	14742
TTGTAGTCCGTGCGAGAA	27.3617	5.52998	1.40988	3.92232	8.7702e-05	0.00344961	hsa|mt-sRNA|Glu|L|14676|tRF-3|18|	hsa|mt-sRNA|Glu|L|14676	tRF-3	normal_1_mismatch	Mt_tRNA	L	sense	Glu	within gene boundary	14676	14693	14674	14742
TTTAAGGATAACAGCTATCCATTGGTC	17.044	1.73458	0.714235	2.42859	0.0151577	0.0821795	hsa|mt-sRNA|Leu2|H|12270|i-tRF-5|27|2A24	hsa|mt-sRNA|Leu2|H|12270	i-tRF-5	normal_1_mismatch	Mt_tRNA	H	sense	Leu2	within gene boundary	12270	12296	12266	12336	2A24
TTTAAGTTAAAGATTAAGAGAACC	36.8088	2.30165	0.866409	2.65654	0.00789475	0.0547989	hsa|mt-sRNA|Lys|H|8323|i-tRF-5|24|	hsa|mt-sRNA|Lys|H|8323	i-tRF-5	normal_1_mismatch	Mt_tRNA	H	sense	Lys	within gene boundary	8323	8346	8295	8364
TTTACAGTCAGAGGTT	17.9254	2.53629	0.968785	2.618	0.00884456	0.0595375	hsa|mt-sRNA|Leu|H|3271|i-tRF-3|16|	hsa|mt-sRNA|Leu|H|3271	i-tRF-3	normal_1_mismatch	Mt_tRNA	H	sense	Leu	within gene boundary	3271	3286	3230	3304
TTTAGACGGGCTCAC	422.807	4.42985	1.12115	3.95116	7.77717e-05	0.00331936	hsa|mt-sRNA|Phe|H|618|i-tRF-3|15|	hsa|mt-sRNA|Phe|H|618	i-tRF-3	normal_1_mismatch	Mt_tRNA	H	sense	Phe	within gene boundary	618	632	577	647
TTTAGACGGGCTCACA	63.7201	3.89172	1.03435	3.76247	0.000168244	0.00535712	hsa|mt-sRNA|Phe|H|618|i-tRF-3|16|	hsa|mt-sRNA|Phe|H|618	i-tRF-3	normal_1_mismatch	Mt_tRNA	H	sense	Phe	within gene boundary	618	633	577	647
TTTAGACGGGCTCACAT	23.9266	3.71657	1.11164	3.34331	0.000827851	0.013738	hsa|mt-sRNA|Phe|H|618|i-tRF-3|17|	hsa|mt-sRNA|Phe|H|618	i-tRF-3	normal_1_mismatch	Mt_tRNA	H	sense	Phe	within gene boundary	618	634	577	647
TTTAGACGGGCTCACATC	15.5757	2.63248	1.05381	2.49807	0.0124871	0.0732428	hsa|mt-sRNA|Phe|H|618|i-tRF-3|18|	hsa|mt-sRNA|Phe|H|618	i-tRF-3	normal_1_mismatch	Mt_tRNA	H	sense	Phe	within gene boundary	618	635	577	647
TTTAGACGGGCTCACATCACC	25.9289	2.65521	0.92013	2.88569	0.0039055	0.0359378	hsa|mt-sRNA|Phe|H|618|i-tRF-3|21|	hsa|mt-sRNA|Phe|H|618	i-tRF-3	normal_1_mismatch	Mt_tRNA	H	sense	Phe	within gene boundary	618	638	577	647
TTTAGACGGGCTCACATCACCC	21.458	2.82273	0.982986	2.87158	0.00408421	0.0367396	hsa|mt-sRNA|Phe|H|618|i-tRF-3|22|	hsa|mt-sRNA|Phe|H|618	i-tRF-3	normal_1_mismatch	Mt_tRNA	H	sense	Phe	within gene boundary	618	639	577	647
TTTAGACGGGCTCACATCACCCCATAAA	5.96647	2.71177	1.13256	2.39438	0.0166485	0.0871979	hsa|mt-sRNA|Phe|H|618|tRF-3|28|	hsa|mt-sRNA|Phe|H|618	tRF-3	normal_1_mismatch	Mt_tRNA	H	sense	Phe	within gene boundary	618	645	577	647
TTTAGCCGGGCTCAC	111.47	3.9765	1.29299	3.07542	0.00210205	0.0239586	hsa|mt-sRNA|Phe|H|618|i-tRF-3|15|5A9	hsa|mt-sRNA|Phe|H|618	i-tRF-3	normal_1_mismatch	Mt_tRNA	H	sense	Phe	within gene boundary	618	632	577	647	5A9
TTTAGCCGGGCTCACA	15.5793	4.64928	1.2629	3.68142	0.000231934	0.00646195	hsa|mt-sRNA|Phe|H|618|i-tRF-3|16|5A10	hsa|mt-sRNA|Phe|H|618	i-tRF-3	normal_1_mismatch	Mt_tRNA	H	sense	Phe	within gene boundary	618	633	577	647	5A10
TTTGATAGAGTAAATAATAGGAGC	13.9265	3.33417	1.23676	2.69589	0.00702012	0.051023	hsa|mt-sRNA|Ile|H|4289|i-tRF-5|24|	hsa|mt-sRNA|Ile|H|4289	i-tRF-5	normal_1_mismatch	Mt_tRNA	H	sense	Ile	within gene boundary	4289	4312	4263	4331
TTTGTCAAAGTTAAATTATAGGCT	14.472	3.71829	1.16888	3.18106	0.00146739	0.0193518	hsa|mt-sRNA|Asp|H|7545|i-tRF-5|24|	hsa|mt-sRNA|Asp|H|7545	i-tRF-5	normal_1_mismatch	Mt_tRNA	H	sense	Asp	within gene boundary	7545	7568	7518	7585
TTTTAAGTTAAAGATTAAGAGAACC	31.5448	2.49374	0.679374	3.67065	0.000241934	0.00664822	hsa|mt-sRNA|Lys|H|8322|i-tRF-5|25|	hsa|mt-sRNA|Lys|H|8322	i-tRF-5	normal_1_mismatch	Mt_tRNA	H	sense	Lys	within gene boundary	8322	8346	8295	8364
TTTTGGTGCAACTCC	12.9694	3.13958	1.06765	2.94064	0.00327536	0.0317138	hsa|mt-sRNA|Leu2|H|12311|i-tRF-3|15|	hsa|mt-sRNA|Leu2|H|12311	i-tRF-3	normal_1_mismatch	Mt_tRNA	H	sense	Leu2	within gene boundary	12311	12325	12266	12336
TTTTTCATATCATTGGTC	27.525	2.38772	1.03439	2.30833	0.0209809	0.099734	hsa|mt-sRNA|Glu|L|14698|i-tRF-3|18|	hsa|mt-sRNA|Glu|L|14698	i-tRF-3	normal_1_mismatch	Mt_tRNA	L	sense	Glu	within gene boundary	14698	14715	14674	14742
AAAAATTTCGGTTGGG	391.114	-1.56235	0.572998	-2.72663	0.00639852	0.0479375	hsa|mt-sRNA|mtLSU rRNA|H|2801|i-3p|16|	hsa|mt-sRNA|mtLSU rRNA|H|2801	i-3prime	normal_1_mismatch	Mt_rRNA	H	sense	mtLSU rRNA	within gene boundary	2801	2816	1671	3229
AAAAATTTCGGTTGGGAC	48.7813	-2.07586	0.77143	-2.69093	0.00712533	0.0514151	hsa|mt-sRNA|mtLSU rRNA|H|2801|i-3p|18|16G1	hsa|mt-sRNA|mtLSU rRNA|H|2801	i-3prime	normal_1_mismatch	Mt_rRNA	H	sense	mtLSU rRNA	within gene boundary	2801	2818	1671	3229	16G1
AAAAATTTCGGTTGGGC	24.5825	-4.06154	1.01112	-4.01686	5.89797e-05	0.00298576	hsa|mt-sRNA|mtLSU rRNA|H|2801|i-3p|17|16G0	hsa|mt-sRNA|mtLSU rRNA|H|2801	i-3prime	normal_1_mismatch	Mt_rRNA	H	sense	mtLSU rRNA	within gene boundary	2801	2817	1671	3229	16G0
AAAATTTCGGTTGGG	527.244	-1.44297	0.582062	-2.47907	0.0131727	0.0750696	hsa|mt-sRNA|mtLSU rRNA|H|2802|i-3p|15|	hsa|mt-sRNA|mtLSU rRNA|H|2802	i-3prime	normal_1_mismatch	Mt_rRNA	H	sense	mtLSU rRNA	within gene boundary	2802	2816	1671	3229
AAAATTTCGGTTGGGA	830.916	-1.41917	0.55934	-2.53721	0.0111739	0.0683379	hsa|mt-sRNA|mtLSU rRNA|H|2802|i-3p|16|15G0	hsa|mt-sRNA|mtLSU rRNA|H|2802	i-3prime	normal_1_mismatch	Mt_rRNA	H	sense	mtLSU rRNA	within gene boundary	2802	2817	1671	3229	15G0
AAAATTTCGGTTGGGAC	76.9873	-2.63571	0.742789	-3.54839	0.000387591	0.00863896	hsa|mt-sRNA|mtLSU rRNA|H|2802|i-3p|17|15G1	hsa|mt-sRNA|mtLSU rRNA|H|2802	i-3prime	normal_1_mismatch	Mt_rRNA	H	sense	mtLSU rRNA	within gene boundary	2802	2818	1671	3229	15G1
AAAGGTTCGTTTGTC	18.5256	-4.28093	1.11852	-3.82731	0.000129551	0.00433131	hsa|mt-sRNA|mtLSU rRNA|H|3028|i-3p|15|14T0	hsa|mt-sRNA|mtLSU rRNA|H|3028	i-3prime	normal_1_mismatch	Mt_rRNA	H	sense	mtLSU rRNA	within gene boundary	3028	3042	1671	3229	14T0
AAATTTCGGTTGGGC	25.8967	-2.78565	0.854658	-3.25937	0.0011166	0.0165918	hsa|mt-sRNA|mtLSU rRNA|H|2803|i-3p|15|14G0	hsa|mt-sRNA|mtLSU rRNA|H|2803	i-3prime	normal_1_mismatch	Mt_rRNA	H	sense	mtLSU rRNA	within gene boundary	2803	2817	1671	3229	14G0
AAGGACATTTAACTAAAACCCCT	11.2434	-3.02677	1.17622	-2.5733	0.0100733	0.0636672	hsa|mt-sRNA|mtSSU rRNA|H|1513|i-3p|23|	hsa|mt-sRNA|mtSSU rRNA|H|1513	i-3prime	normal_1_mismatch	Mt_rRNA	H	sense	mtSSU rRNA	within gene boundary	1513	1535	648	1601
AATAAAGTATAGGCGATAGAAATTGAAACCT	10.6605	-2.21466	0.903738	-2.45055	0.0142638	0.0786078	hsa|mt-sRNA|mtLSU rRNA|H|1736|i-5p|31|	hsa|mt-sRNA|mtLSU rRNA|H|1736	i-5prime	normal_1_mismatch	Mt_rRNA	H	sense	mtLSU rRNA	within gene boundary	1736	1766	1671	3229
AATTTCGGTTGGGAC	109.859	-1.66022	0.714383	-2.32398	0.0201263	0.0972877	hsa|mt-sRNA|mtLSU rRNA|H|2804|i-3p|15|13G1	hsa|mt-sRNA|mtLSU rRNA|H|2804	i-3prime	normal_1_mismatch	Mt_rRNA	H	sense	mtLSU rRNA	within gene boundary	2804	2818	1671	3229	13G1
ACATACCCATGGCCAACCT	12.2751	-1.52891	0.658572	-2.32156	0.0202568	0.0976809	hsa|mt-sRNA|tRNA-Leu|H|3305|tRF-1|19|	hsa|mt-sRNA|tRNA-Leu|H|3305	tRF-1	normal_1_mismatch	protein_coding	H	sense	tRNA-Leu	overlap gene boundary	3305	3323	3307	4262
ACATATAACTGAACTCCTCACACCCAATTGGACC	2.45746	-4.00672	1.40162	-2.85863	0.0042547	0.0374339	hsa|mt-sRNA|mtLSU rRNA|H|2239|i-5p|34|	hsa|mt-sRNA|mtLSU rRNA|H|2239	i-5prime	normal_1_mismatch	Mt_rRNA	H	sense	mtLSU rRNA	within gene boundary	2239	2272	1671	3229
ACCCAAATAAAGTATAGGCGATAGAAATTGAAACCT	23.2629	-2.82217	0.837257	-3.37073	0.000749696	0.0130773	hsa|mt-sRNA|mtLSU rRNA|H|1731|i-5p|36|	hsa|mt-sRNA|mtLSU rRNA|H|1731	i-5prime	normal_1_mismatch	Mt_rRNA	H	sense	mtLSU rRNA	within gene boundary	1731	1766	1671	3229
ACCCAAATAAAGTATAGGCGATAGAAATTGAAACCTGGCGC	4.51325	-4.96992	1.28317	-3.87316	0.000107434	0.00394441	hsa|mt-sRNA|mtLSU rRNA|H|1731|i-5p|41|	hsa|mt-sRNA|mtLSU rRNA|H|1731	i-5prime	normal_1_mismatch	Mt_rRNA	H	sense	mtLSU rRNA	within gene boundary	1731	1771	1671	3229
ACCCAAATAAAGTATAGGCGATAGAAATTGAAACCTGGCGCAATA	1.26659	-4.52176	1.71163	-2.64178	0.00824707	0.0565663	hsa|mt-sRNA|mtLSU rRNA|H|1731|i-5p|45|	hsa|mt-sRNA|mtLSU rRNA|H|1731	i-5prime	normal_1_mismatch	Mt_rRNA	H	sense	mtLSU rRNA	within gene boundary	1731	1775	1671	3229
AGAACGCCTGAACGCAGGCACC	17.9905	-1.71071	0.587937	-2.90969	0.00361789	0.0342334	hsa|mt-sRNA|ND4|H|11179|i-5p|22|21A0	hsa|mt-sRNA|ND4|H|11179	i-5prime	normal_1_mismatch	protein_coding	H	sense	ND4	within gene boundary	11179	11200	10760	12137	21A0
AGCCTGCGTCAGATTAAAACACTGAACTGACA	10.3985	-2.18949	0.93231	-2.34846	0.0188514	0.0929137	hsa|mt-sRNA|mtLSU rRNA|H|2338|i-5p|32|	hsa|mt-sRNA|mtLSU rRNA|H|2338	i-5prime	normal_1_mismatch	Mt_rRNA	H	sense	mtLSU rRNA	within gene boundary	2338	2369	1671	3229
AGCGAGGTTGACCTGT	9.00738	-3.31472	1.20413	-2.75279	0.00590905	0.0459222	hsa|mt-sRNA|ND5|L|as13630|i-5p|16|	hsa|mt-sRNA|ND5|L|as13630	i-5prime	normal_1_mismatch	protein_coding	L	anti-sense	ND5	within gene boundary	13630	13645	12337	14148
ATAACTGAACTCCTCACACCCAATTGGACC	3.13375	-4.40784	1.32495	-3.32681	0.000878469	0.0138979	hsa|mt-sRNA|mtLSU rRNA|H|2243|i-5p|30|	hsa|mt-sRNA|mtLSU rRNA|H|2243	i-5prime	normal_1_mismatch	Mt_rRNA	H	sense	mtLSU rRNA	within gene boundary	2243	2272	1671	3229
ATAGGCGATCGAAATTGAAACCT	33.6825	-7.09612	1.8983	-3.73814	0.000185386	0.00563461	hsa|mt-sRNA|mtLSU rRNA|H|1744|i-5p|23|9A13	hsa|mt-sRNA|mtLSU rRNA|H|1744	i-5prime	normal_1_mismatch	Mt_rRNA	H	sense	mtLSU rRNA	within gene boundary	1744	1766	1671	3229	9A13
ATATAACTGAACTCCTCACACCCA	3.08187	-3.70109	1.56761	-2.36098	0.0182268	0.0911793	hsa|mt-sRNA|mtLSU rRNA|H|2241|i-5p|24|	hsa|mt-sRNA|mtLSU rRNA|H|2241	i-5prime	normal_1_mismatch	Mt_rRNA	H	sense	mtLSU rRNA	within gene boundary	2241	2264	1671	3229
ATATAACTGAACTCCTCACACCCAATTGGACC	4.75601	-3.05407	1.08907	-2.8043	0.00504265	0.0419277	hsa|mt-sRNA|mtLSU rRNA|H|2241|i-5p|32|	hsa|mt-sRNA|mtLSU rRNA|H|2241	i-5prime	normal_1_mismatch	Mt_rRNA	H	sense	mtLSU rRNA	within gene boundary	2241	2272	1671	3229
ATTAATCCCCTGGCCCAACCC	16.8136	-2.27335	0.773403	-2.93941	0.00328837	0.0317138	hsa|mt-sRNA|tRNA-Met|H|4470|tRF-1|21|	hsa|mt-sRNA|tRNA-Met|H|4470	tRF-1	normal_1_mismatch	protein_coding	H	sense	tRNA-Met	within gene boundary	4470	4490	4470	5511
ATTAGGAGGGCTGAGAGGGCCCCTGTAA	11.8064	-2.32488	0.937406	-2.48012	0.0131338	0.075063	hsa|mt-sRNA|COIII|L|as9259|i-3p|28|1A26	hsa|mt-sRNA|COIII|L|as9259	i-3prime	normal_1_mismatch	protein_coding	L	anti-sense	COIII	within gene boundary	9259	9286	9207	9990	1A26
ATTTACCCAAATAAAGTATAGGCGATAGAAATTGAAACCTGGC	3.24431	-3.89833	1.37576	-2.83358	0.00460297	0.0394597	hsa|mt-sRNA|mtLSU rRNA|H|1727|i-5p|43|	hsa|mt-sRNA|mtLSU rRNA|H|1727	i-5prime	normal_1_mismatch	Mt_rRNA	H	sense	mtLSU rRNA	within gene boundary	1727	1769	1671	3229
ATTTACCCAAATAAAGTATAGGCGATAGAAATTGAAACCTGGCGC	2.66975	-5.63927	1.52422	-3.69977	0.000215793	0.00617804	hsa|mt-sRNA|mtLSU rRNA|H|1727|i-5p|45|	hsa|mt-sRNA|mtLSU rRNA|H|1727	i-5prime	normal_1_mismatch	Mt_rRNA	H	sense	mtLSU rRNA	within gene boundary	1727	1771	1671	3229
CAACAATAGGGTTTACGACCTCGATGTTGGACCA	102.552	-2.67776	0.883737	-3.03004	0.00244523	0.0260795	hsa|mt-sRNA|mtLSU rRNA|H|2967|i-3p|34|31T2	hsa|mt-sRNA|mtLSU rRNA|H|2967	i-3prime	normal_1_mismatch	Mt_rRNA	H	sense	mtLSU rRNA	within gene boundary	2967	3000	1671	3229	31T2
CAAATAAAGTATAGGCGATAGAAATTGAAACC	10.8121	-3.22911	0.899654	-3.58929	0.000331585	0.00791856	hsa|mt-sRNA|mtLSU rRNA|H|1734|i-5p|32|	hsa|mt-sRNA|mtLSU rRNA|H|1734	i-5prime	normal_1_mismatch	Mt_rRNA	H	sense	mtLSU rRNA	within gene boundary	1734	1765	1671	3229
CAAATAAAGTATAGGCGATAGAAATTGAAACCTGGC	1.80081	-4.34727	1.71138	-2.54022	0.0110784	0.0681694	hsa|mt-sRNA|mtLSU rRNA|H|1734|i-5p|36|	hsa|mt-sRNA|mtLSU rRNA|H|1734	i-5prime	normal_1_mismatch	Mt_rRNA	H	sense	mtLSU rRNA	within gene boundary	1734	1769	1671	3229
CAAATAAAGTATAGGCGATAGAAATTGAAACCTGGCGCA	3.0925	-2.67508	1.14197	-2.34252	0.019154	0.0934864	hsa|mt-sRNA|mtLSU rRNA|H|1734|i-5p|39|	hsa|mt-sRNA|mtLSU rRNA|H|1734	i-5prime	normal_1_mismatch	Mt_rRNA	H	sense	mtLSU rRNA	within gene boundary	1734	1772	1671	3229
CATATAACTGAACTCCTCACACCCAATTGGACC	2.22876	-4.69339	1.62927	-2.88068	0.00396821	0.036348	hsa|mt-sRNA|mtLSU rRNA|H|2240|i-5p|33|	hsa|mt-sRNA|mtLSU rRNA|H|2240	i-5prime	normal_1_mismatch	Mt_rRNA	H	sense	mtLSU rRNA	within gene boundary	2240	2272	1671	3229
CATTAGGAGGGCTGAGAGGGCCCCTG	10.5225	-3.35761	0.918656	-3.65492	0.000257265	0.006879	hsa|mt-sRNA|COIII|L|as9262|i-3p|26|	hsa|mt-sRNA|COIII|L|as9262	i-3prime	normal_1_mismatch	protein_coding	L	anti-sense	COIII	within gene boundary	9262	9287	9207	9990
CATTAGGAGGGCTGAGAGGGCCCCTGA	17.7375	-1.7837	0.650705	-2.74117	0.00612204	0.0466246	hsa|mt-sRNA|COIII|L|as9261|i-3p|27|0A26	hsa|mt-sRNA|COIII|L|as9261	i-3prime	normal_1_mismatch	protein_coding	L	anti-sense	COIII	within gene boundary	9261	9287	9207	9990	0A26
CATTAGGAGGGCTGAGAGGGCCCCTGTCA	20.7222	-7.20794	1.86995	-3.85462	0.000115908	0.00401207	hsa|mt-sRNA|COIII|L|as9259|i-3p|29|1A27	hsa|mt-sRNA|COIII|L|as9259	i-3prime	normal_1_mismatch	protein_coding	L	anti-sense	COIII	within gene boundary	9259	9287	9207	9990	1A27
CCAAATAAAGTATAGGCGATAGAAATTGAAACCTGGC	1.88938	-3.77878	1.53389	-2.46353	0.0137578	0.076875	hsa|mt-sRNA|mtLSU rRNA|H|1733|i-5p|37|	hsa|mt-sRNA|mtLSU rRNA|H|1733	i-5prime	normal_1_mismatch	Mt_rRNA	H	sense	mtLSU rRNA	within gene boundary	1733	1769	1671	3229
CCCAAATAAAGTATAGGCGATAGAAATTGAAACCTGGC	6.44703	-4.95875	1.22831	-4.03706	5.41254e-05	0.00298576	hsa|mt-sRNA|mtLSU rRNA|H|1732|i-5p|38|	hsa|mt-sRNA|mtLSU rRNA|H|1732	i-5prime	normal_1_mismatch	Mt_rRNA	H	sense	mtLSU rRNA	within gene boundary	1732	1769	1671	3229
GCACTTGGACGAACA	57.0127	2.02599	0.627517	3.22858	0.00124408	0.0171679	hsa|mt-sRNA|mtSSU rRNA|H|1588|3p|15|14C0	hsa|mt-sRNA|mtSSU rRNA|H|1588	3prime	normal_1_mismatch	Mt_rRNA	H	sense	mtSSU rRNA	within gene boundary	1588	1602	648	1601	14C0
GCGAGGTTGACCTGT	14.191	-3.30725	1.10183	-3.00158	0.00268579	0.0279155	hsa|mt-sRNA|ND5|L|as13630|i-5p|15|	hsa|mt-sRNA|ND5|L|as13630	i-5prime	normal_1_mismatch	protein_coding	L	anti-sense	ND5	within gene boundary	13630	13644	12337	14148
GCGAGGTTGACCTGTA	12.3351	-2.81877	1.0964	-2.57094	0.0101423	0.0636672	hsa|mt-sRNA|ND5|L|as13629|i-5p|16|0A15	hsa|mt-sRNA|ND5|L|as13629	i-5prime	normal_1_mismatch	protein_coding	L	anti-sense	ND5	within gene boundary	13629	13644	12337	14148	0A15
GCTAAACCTAGCCCCAAACC	93.8341	2.9417	1.08542	2.71019	0.00672445	0.0492309	hsa|mt-sRNA|tRNA-Val|H|1671|tRF-1|20|	hsa|mt-sRNA|tRNA-Val|H|1671	tRF-1	normal_1_mismatch	Mt_rRNA	H	sense	tRNA-Val	within gene boundary	1671	1690	1671	3229
GCTAAACCTAGCCCCAAACCCAC	39.0322	-1.6046	0.693177	-2.31484	0.0206215	0.0987271	hsa|mt-sRNA|tRNA-Val|H|1671|tRF-1|23|	hsa|mt-sRNA|tRNA-Val|H|1671	tRF-1	normal_1_mismatch	Mt_rRNA	H	sense	tRNA-Val	within gene boundary	1671	1693	1671	3229
GCTAAACCTAGCCCCAAACCCACA	49.6068	-1.63069	0.639502	-2.54994	0.010774	0.0667058	hsa|mt-sRNA|tRNA-Val|H|1671|tRF-1|24|23T0	hsa|mt-sRNA|tRNA-Val|H|1671	tRF-1	normal_1_mismatch	Mt_rRNA	H	sense	tRNA-Val	within gene boundary	1671	1694	1671	3229	23T0
GCTAAACCTAGCCCCAAACCCACTCCACCTTCCTACCAGACAACC	5.15102	5.09478	1.37375	3.70868	0.000208341	0.00614607	hsa|mt-sRNA|tRNA-Val|H|1671|tRF-1|45|31A13	hsa|mt-sRNA|tRNA-Val|H|1671	tRF-1	normal_1_mismatch	Mt_rRNA	H	sense	tRNA-Val	within gene boundary	1671	1715	1671	3229	31A13
GCTAAACCTCGCCCCAAACCCACTCCACCTTACTACCA	13.3687	-7.97926	3.38856	-2.35476	0.0185344	0.0922583	hsa|mt-sRNA|tRNA-Val|H|1671|tRF-1|38|9A28	hsa|mt-sRNA|tRNA-Val|H|1671	tRF-1	normal_1_mismatch	Mt_rRNA	H	sense	tRNA-Val	within gene boundary	1671	1708	1671	3229	9A28
GCTAAACCTCGCCCCAAACCCACTCCACCTTACTACCAGACAACC	14.5489	-7.37406	3.07153	-2.40078	0.0163602	0.0859126	hsa|mt-sRNA|tRNA-Val|H|1671|tRF-1|45|9A35	hsa|mt-sRNA|tRNA-Val|H|1671	tRF-1	normal_1_mismatch	Mt_rRNA	H	sense	tRNA-Val	within gene boundary	1671	1715	1671	3229	9A35
GCTAACCCTAGCCCCAAACC	21.4958	3.75676	1.33358	2.81705	0.00484677	0.0408823	hsa|mt-sRNA|tRNA-Val|H|1671|tRF-1|20|5A14	hsa|mt-sRNA|tRNA-Val|H|1671	tRF-1	normal_1_mismatch	Mt_rRNA	H	sense	tRNA-Val	within gene boundary	1671	1690	1671	3229	5A14
GCTAACCCTAGCCCCAAACCCACTCCACCTTACTACCAGACAA	17.2503	4.9631	1.29515	3.83205	0.000127078	0.00432064	hsa|mt-sRNA|tRNA-Val|H|1671|tRF-1|43|5A37	hsa|mt-sRNA|tRNA-Val|H|1671	tRF-1	normal_1_mismatch	Mt_rRNA	H	sense	tRNA-Val	within gene boundary	1671	1713	1671	3229	5A37
GCTATTAAAGGTTCGTTTGT	17.2029	-1.64941	0.637621	-2.58682	0.0096865	0.0622792	hsa|mt-sRNA|mtLSU rRNA|H|3022|i-3p|20|	hsa|mt-sRNA|mtLSU rRNA|H|3022	i-3prime	normal_1_mismatch	Mt_rRNA	H	sense	mtLSU rRNA	within gene boundary	3022	3041	1671	3229
GCTTAGTTGAACAGGGCCCTGAAGCGCGTACACACCGCCCGTCACCC	13.5242	2.57788	0.988493	2.60789	0.00911017	0.0600775	hsa|mt-sRNA|mtSSU rRNA|H|1449|i-3p|47|	hsa|mt-sRNA|mtSSU rRNA|H|1449	i-3prime	normal_1_mismatch	Mt_rRNA	H	sense	mtSSU rRNA	within gene boundary	1449	1495	648	1601
GTAGGCGATAGAAATTGAAACCT	4.52503	-6.42057	1.78591	-3.59513	0.000324232	0.00783626	hsa|mt-sRNA|mtLSU rRNA|H|1744|i-5p|23|0A22	hsa|mt-sRNA|mtLSU rRNA|H|1744	i-5prime	normal_1_mismatch	Mt_rRNA	H	sense	mtLSU rRNA	within gene boundary	1744	1766	1671	3229	0A22
TAAAAATTTCGGTTGGG	145.363	-1.54189	0.474834	-3.24722	0.00116539	0.0168186	hsa|mt-sRNA|mtLSU rRNA|H|2800|i-3p|17|	hsa|mt-sRNA|mtLSU rRNA|H|2800	i-3prime	normal_1_mismatch	Mt_rRNA	H	sense	mtLSU rRNA	within gene boundary	2800	2816	1671	3229
TAAAAATTTCGGTTGGGA	175.51	-1.58718	0.519595	-3.05466	0.00225317	0.0249098	hsa|mt-sRNA|mtLSU rRNA|H|2800|i-3p|18|17G0	hsa|mt-sRNA|mtLSU rRNA|H|2800	i-3prime	normal_1_mismatch	Mt_rRNA	H	sense	mtLSU rRNA	within gene boundary	2800	2817	1671	3229	17G0
TAAAGGTTCGTTTGT	303.81	-1.34437	0.556478	-2.41585	0.0156984	0.0842004	hsa|mt-sRNA|mtLSU rRNA|H|3027|i-3p|15|	hsa|mt-sRNA|mtLSU rRNA|H|3027	i-3prime	normal_1_mismatch	Mt_rRNA	H	sense	mtLSU rRNA	within gene boundary	3027	3041	1671	3229
TAAAGGTTCGTTTGTA	240.45	-1.85783	0.529622	-3.50784	0.000451766	0.0095394	hsa|mt-sRNA|mtLSU rRNA|H|3027|i-3p|16|15T0	hsa|mt-sRNA|mtLSU rRNA|H|3027	i-3prime	normal_1_mismatch	Mt_rRNA	H	sense	mtLSU rRNA	within gene boundary	3027	3042	1671	3229	15T0
TACCCAAATAAAGTATAGGCGATAGAAATTGAAACCTGGCG	1.8747	-4.44491	1.59202	-2.79199	0.00523844	0.0423722	hsa|mt-sRNA|mtLSU rRNA|H|1730|i-5p|41|	hsa|mt-sRNA|mtLSU rRNA|H|1730	i-5prime	normal_1_mismatch	Mt_rRNA	H	sense	mtLSU rRNA	within gene boundary	1730	1770	1671	3229
TACCCAAATAAAGTATAGGCGATAGAAATTGAAACCTGGCGC	1.59218	-4.85034	1.6861	-2.87667	0.004019	0.0364801	hsa|mt-sRNA|mtLSU rRNA|H|1730|i-5p|42|	hsa|mt-sRNA|mtLSU rRNA|H|1730	i-5prime	normal_1_mismatch	Mt_rRNA	H	sense	mtLSU rRNA	within gene boundary	1730	1771	1671	3229
TATAACTGAACTCCTCACACCCAATTGG	2.44304	-4.70073	1.48859	-3.15784	0.00158944	0.0200529	hsa|mt-sRNA|mtLSU rRNA|H|2242|i-5p|28|	hsa|mt-sRNA|mtLSU rRNA|H|2242	i-5prime	normal_1_mismatch	Mt_rRNA	H	sense	mtLSU rRNA	within gene boundary	2242	2269	1671	3229
TATAACTGAACTCCTCACACCCAATTGGACC	7.8961	-2.76866	0.975608	-2.83789	0.00454132	0.0391441	hsa|mt-sRNA|mtLSU rRNA|H|2242|i-5p|31|	hsa|mt-sRNA|mtLSU rRNA|H|2242	i-5prime	normal_1_mismatch	Mt_rRNA	H	sense	mtLSU rRNA	within gene boundary	2242	2272	1671	3229
TATTAAAGGTTCGTTTGT	107.534	-1.51003	0.631585	-2.39086	0.016809	0.0878094	hsa|mt-sRNA|mtLSU rRNA|H|3024|i-3p|18|	hsa|mt-sRNA|mtLSU rRNA|H|3024	i-3prime	normal_1_mismatch	Mt_rRNA	H	sense	mtLSU rRNA	within gene boundary	3024	3041	1671	3229
TATTAAAGGTTCGTTTGTA	91.8985	-1.63011	0.671812	-2.42643	0.0152481	0.0824468	hsa|mt-sRNA|mtLSU rRNA|H|3024|i-3p|19|18T0	hsa|mt-sRNA|mtLSU rRNA|H|3024	i-3prime	normal_1_mismatch	Mt_rRNA	H	sense	mtLSU rRNA	within gene boundary	3024	3042	1671	3229	18T0
TCATTAGGAGGGCTGAGAGGGCCCCTGTAA	12.9968	-2.14892	0.855224	-2.5127	0.011981	0.0711061	hsa|mt-sRNA|COIII|L|as9259|i-3p|30|1A28	hsa|mt-sRNA|COIII|L|as9259	i-3prime	normal_1_mismatch	protein_coding	L	anti-sense	COIII	within gene boundary	9259	9288	9207	9990	1A28
TTACCCAAATAAAGTATAGGCGATAGAAATTGAAACCTGGC	2.18651	-5.30036	1.88218	-2.81607	0.00486149	0.0408823	hsa|mt-sRNA|mtLSU rRNA|H|1729|i-5p|41|	hsa|mt-sRNA|mtLSU rRNA|H|1729	i-5prime	normal_1_mismatch	Mt_rRNA	H	sense	mtLSU rRNA	within gene boundary	1729	1769	1671	3229
TTACCCAAATAAAGTATAGGCGATAGAAATTGAAACCTGGCGCA	1.53204	-4.01238	1.63921	-2.44776	0.0143748	0.0787867	hsa|mt-sRNA|mtLSU rRNA|H|1729|i-5p|44|	hsa|mt-sRNA|mtLSU rRNA|H|1729	i-5prime	normal_1_mismatch	Mt_rRNA	H	sense	mtLSU rRNA	within gene boundary	1729	1772	1671	3229
AAAAGACACCCCCCACA	26.9992	-2.06107	0.840599	-2.4519	0.0142104	0.0785421	hsa|mt-sRNA|non-coding|H|560|nc|17|0C16	hsa|mt-sRNA|non-coding|H|560	non-coding	normal_1_mismatch	non-coding	H	sense	non-coding	falls in non-coding region	560	576	na	na	0C16
AAAAGATAAAATTTGAAATCTGGTTAGGCTGGA	23.7035	-2.45623	0.993658	-2.4719	0.0134396	0.0755176	hsa|mt-sRNA|non-coding|L|as376|nc|33|0A32	hsa|mt-sRNA|non-coding|L|as376	non-coding	normal_1_mismatch	non-coding	L	anti-sense	non-coding	falls in non-coding region	376	408	na	na	0A32
AAAGACACCCCCCACA	30.611	-1.92053	0.780949	-2.45922	0.0139239	0.077587	hsa|mt-sRNA|non-coding|H|561|nc|16|	hsa|mt-sRNA|non-coding|H|561	non-coding	normal_1_mismatch	non-coding	H	sense	non-coding	falls in non-coding region	561	576	na	na
AAAGATAAAATTTGAAATCTGGTTAGGCTGGA	110.385	-2.16732	0.858838	-2.52355	0.0116175	0.0693219	hsa|mt-sRNA|non-coding|L|as376|nc|32|0A31	hsa|mt-sRNA|non-coding|L|as376	non-coding	normal_1_mismatch	non-coding	L	anti-sense	non-coding	falls in non-coding region	376	407	na	na	0A31
AAGATAAAATTTGAAATCTGGTTAGGC	14.3857	-2.34175	0.943282	-2.48255	0.0130445	0.0749778	hsa|mt-sRNA|non-coding|L|as380|nc|27|	hsa|mt-sRNA|non-coding|L|as380	non-coding	normal_1_mismatch	non-coding	L	anti-sense	non-coding	falls in non-coding region	380	406	na	na
AAGATAAAATTTGAAATCTGGTTAGGCTGGA	54.0339	-2.46154	0.991377	-2.48295	0.0130299	0.0749778	hsa|mt-sRNA|non-coding|L|as376|nc|31|0A30	hsa|mt-sRNA|non-coding|L|as376	non-coding	normal_1_mismatch	non-coding	L	anti-sense	non-coding	falls in non-coding region	376	406	na	na	0A30
AATCTGGTTAGGCTGGA	22.1628	-2.29202	0.978234	-2.34302	0.0191283	0.0934864	hsa|mt-sRNA|non-coding|L|as376|nc|17|0A16	hsa|mt-sRNA|non-coding|L|as376	non-coding	normal_1_mismatch	non-coding	L	anti-sense	non-coding	falls in non-coding region	376	392	na	na	0A16
CAGAGAATAGTTTAAATTAGAATC	153.976	-2.13798	0.548564	-3.8974	9.72303e-05	0.00375084	hsa|mt-sRNA|non-coding|L|as16000|nc|24|	hsa|mt-sRNA|non-coding|L|as16000	non-coding	normal_1_mismatch	non-coding	L	anti-sense	non-coding	falls in non-coding region	16000	16023	na	na
CCGGCGGCGGGAGAA	44.1862	5.02784	1.30443	3.85442	0.000116002	0.00401207	hsa|mt-sRNA|non-coding|L|as5731|nc|15|	hsa|mt-sRNA|non-coding|L|as5731	non-coding	normal_1_mismatch	non-coding	L	anti-sense	non-coding	falls in non-coding region	5731	5745	na	na
GATCAGAGAAAAAGTCTTTAACTCCACCATTAGCACCCA	3.21752	-5.20326	2.25556	-2.30686	0.0210625	0.099885	hsa|mt-sRNA|non-coding|H|15954|nc|39|0A38	hsa|mt-sRNA|non-coding|H|15954	non-coding	normal_1_mismatch	non-coding	H	sense	non-coding	falls in non-coding region	15954	15992	na	na	0A38
TTTTTTCCCGGCGGC	385.604	4.13512	1.30506	3.16853	0.00153211	0.0195759	hsa|mt-sRNA|non-coding|L|as5738|nc|15|	hsa|mt-sRNA|non-coding|L|as5738	non-coding	normal_1_mismatch	non-coding	L	anti-sense	non-coding	falls in non-coding region	5738	5752	na	na
AACTTAACTTGACCGCTCTGACCA	383.048	-3.3777	0.83586	-4.04099	5.32265e-05	0.00298576	hsa|mt-sRNA|Val|H|1650|tRF-5|24|CCA	hsa|mt-sRNA|Val|H|1650-CCA	tRF-5	CCA_0_mismatch	Mt_tRNA	H	sense	Val	within gene boundary	1650	1670	1602	1670	CCA
AACTTACACTTAGGAGATTTCAACTTAACTTGACCGCTCTGACCA	286.318	-1.77669	0.711617	-2.49669	0.0125359	0.0733152	hsa|mt-sRNA|Val|H|1629|tRF-5|45|CCA	hsa|mt-sRNA|Val|H|1629-CCA	tRF-5	CCA_0_mismatch	Mt_tRNA	H	sense	Val	within gene boundary	1629	1670	1602	1670	CCA
AACTTGACCGCTCTGACCA	640.583	-2.93115	0.668895	-4.38208	1.17551e-05	0.00118937	hsa|mt-sRNA|Val|H|1655|tRF-5|19|CCA	hsa|mt-sRNA|Val|H|1655-CCA	tRF-5	CCA_0_mismatch	Mt_tRNA	H	sense	Val	within gene boundary	1655	1670	1602	1670	CCA
AATACTTAATTTCTGCCA	25.2127	-1.99451	0.687878	-2.89952	0.00373734	0.0350332	hsa|mt-sRNA|Trp|H|5565|tRF-5|18|CCA	hsa|mt-sRNA|Trp|H|5565-CCA	tRF-5	CCA_0_mismatch	Mt_tRNA	H	sense	Trp	within gene boundary	5565	5579	5512	5579	CCA
ACACTTAGGAGATTTCAACTTAACTTGACCGCTCTGACCA	130.21	-1.77934	0.666339	-2.67033	0.00757777	0.0537138	hsa|mt-sRNA|Val|H|1634|tRF-5|40|CCA	hsa|mt-sRNA|Val|H|1634-CCA	tRF-5	CCA_0_mismatch	Mt_tRNA	H	sense	Val	within gene boundary	1634	1670	1602	1670	CCA
ACTTAACTTGACCGCTCTGACCA	466.923	-2.34263	0.760695	-3.0796	0.00207279	0.0237601	hsa|mt-sRNA|Val|H|1651|tRF-5|23|CCA	hsa|mt-sRNA|Val|H|1651-CCA	tRF-5	CCA_0_mismatch	Mt_tRNA	H	sense	Val	within gene boundary	1651	1670	1602	1670	CCA
ACTTACACTTAGGAGATTTCAACTTAACTTGACCGCTCTGACCA	117.919	-2.05751	0.793697	-2.59231	0.00953334	0.0616899	hsa|mt-sRNA|Val|H|1630|tRF-5|44|CCA	hsa|mt-sRNA|Val|H|1630-CCA	tRF-5	CCA_0_mismatch	Mt_tRNA	H	sense	Val	within gene boundary	1630	1670	1602	1670	CCA
ACTTGACCGCTCTGACCA	243.277	-2.4255	0.766058	-3.16621	0.0015444	0.019608	hsa|mt-sRNA|Val|H|1656|tRF-5|18|CCA	hsa|mt-sRNA|Val|H|1656-CCA	tRF-5	CCA_0_mismatch	Mt_tRNA	H	sense	Val	within gene boundary	1656	1670	1602	1670	CCA
AGTAAGGTCAGCTAAATAAGCTATCGGGCCCCCA	20.9032	3.66411	0.84536	4.33438	1.4617e-05	0.00139627	hsa|mt-sRNA|Met|H|4402|tRF-3|34|CCA	hsa|mt-sRNA|Met|H|4402-CCA	tRF-3	CCA_0_mismatch	Mt_tRNA	H	sense	Met	within gene boundary	4402	4432	4402	4469	CCA
AGATTTCAACTTAACTTGACCGCTCTGACCA	1818.94	-2.48537	0.755132	-3.2913	0.000997244	0.0151551	hsa|mt-sRNA|Val|H|1643|tRH-5|31|CCA	hsa|mt-sRNA|Val|H|1643-CCA	tRNA-half-5	CCA_0_mismatch	Mt_tRNA	H	sense	Val	within gene boundary	1643	1670	1602	1670	CCA
ATATCATTGGTCGTGGTTGTAGTCCGTGCGAGAATACCA	1761.53	-2.75561	0.690932	-3.98825	6.65619e-05	0.00310519	hsa|mt-sRNA|Glu|L|14674|tRF-3|39|CCA	hsa|mt-sRNA|Glu|L|14674-CCA	tRF-3	CCA_0_mismatch	Mt_tRNA	L	sense	Glu	within gene boundary	14674	14709	14674	14742	CCA
ATACTTAATTTCTGCCA	30.3488	1.75908	0.673283	2.61269	0.00898322	0.0600678	hsa|mt-sRNA|Trp|H|5566|tRF-5|17|CCA	hsa|mt-sRNA|Trp|H|5566-CCA	tRF-5	CCA_0_mismatch	Mt_tRNA	H	sense	Trp	within gene boundary	5566	5579	5512	5579	CCA
ATCATTGGTCGTGGTTGTAGTCCGTGCGAGAATACCA	501.408	-4.0269	0.823124	-4.89222	9.97034e-07	0.000346037	hsa|mt-sRNA|Glu|L|14674|tRH-3|37|CCA	hsa|mt-sRNA|Glu|L|14674-CCA	tRNA-half-3	CCA_0_mismatch	Mt_tRNA	L	sense	Glu	within gene boundary	14674	14707	14674	14742	CCA
CAACTTAACTTGACCGCTCTGACCA	505.026	-3.20474	0.770297	-4.16039	3.17704e-05	0.00235016	hsa|mt-sRNA|Val|H|1649|tRF-5|25|CCA	hsa|mt-sRNA|Val|H|1649-CCA	tRF-5	CCA_0_mismatch	Mt_tRNA	H	sense	Val	within gene boundary	1649	1670	1602	1670	CCA
CAACTTACACTTAGGAGATTTCAACTTAACTTGACCGCTCTGACCA	653.238	-2.23841	0.688748	-3.24996	0.0011542	0.0168186	hsa|mt-sRNA|Val|H|1628|tRF-5|46|CCA	hsa|mt-sRNA|Val|H|1628-CCA	tRF-5	CCA_0_mismatch	Mt_tRNA	H	sense	Val	within gene boundary	1628	1670	1602	1670	CCA
ATTGGTCGTGGTTGTAGTCCGTGCGAGAATACCA	3198	-1.7611	0.594692	-2.96136	0.00306284	0.0302663	hsa|mt-sRNA|Glu|L|14674|tRH-3|34|CCA	hsa|mt-sRNA|Glu|L|14674-CCA	tRNA-half-3	CCA_0_mismatch	Mt_tRNA	L	sense	Glu	within gene boundary	14674	14704	14674	14742	CCA
ATTTCAACTTAACTTGACCGCTCTGACCA	134.925	-3.8749	0.936726	-4.13664	3.52424e-05	0.0024378	hsa|mt-sRNA|Val|H|1645|tRF-5|29|CCA	hsa|mt-sRNA|Val|H|1645-CCA	tRF-5	CCA_0_mismatch	Mt_tRNA	H	sense	Val	within gene boundary	1645	1670	1602	1670	CCA
CCAACTTACACTTAGGAGATTTCAACTTAACTTGACCGCTCTGACCA	385.005	-2.5281	0.717893	-3.52156	0.000429019	0.00923815	hsa|mt-sRNA|Val|H|1627|tRF-5|47|CCA	hsa|mt-sRNA|Val|H|1627-CCA	tRF-5	CCA_0_mismatch	Mt_tRNA	H	sense	Val	within gene boundary	1627	1670	1602	1670	CCA
CATCACCCCATAAACACCA	61.531	2.36962	0.72628	3.26268	0.00110364	0.0165216	hsa|mt-sRNA|Phe|H|632|tRF-5|19|CCA	hsa|mt-sRNA|Phe|H|632-CCA	tRF-5	CCA_0_mismatch	Mt_tRNA	H	sense	Phe	within gene boundary	632	647	577	647	CCA
CATATCATTGGTCGTGGTTGTAGTCCGTGCGAGAATACCA	83.5187	-2.29662	0.697073	-3.29466	0.000985406	0.0150895	hsa|mt-sRNA|Glu|L|14674|tRF-3|40|CCA	hsa|mt-sRNA|Glu|L|14674-CCA	tRF-3	CCA_0_mismatch	Mt_tRNA	L	sense	Glu	within gene boundary	14674	14710	14674	14742	CCA
CATTGGTCGTGGTTGTAGTCCGTGCGAGAATACCA	687.606	-2.36278	0.708707	-3.33392	0.000856301	0.013813	hsa|mt-sRNA|Glu|L|14674|tRH-3|35|CCA	hsa|mt-sRNA|Glu|L|14674-CCA	tRNA-half-3	CCA_0_mismatch	Mt_tRNA	L	sense	Glu	within gene boundary	14674	14705	14674	14742	CCA
CGTGGTTGTAGTCCGTGCGAGAATACCA	1191.68	-2.79289	0.736976	-3.78966	0.000150854	0.00488087	hsa|mt-sRNA|Glu|L|14674|tRF-3|28|CCA	hsa|mt-sRNA|Glu|L|14674-CCA	tRF-3	CCA_0_mismatch	Mt_tRNA	L	sense	Glu	within gene boundary	14674	14698	14674	14742	CCA
CTTAGGAGATTTCAACTTAACTTGACCGCTCTGACCA	58.0735	-1.79297	0.620299	-2.89048	0.00384649	0.0355579	hsa|mt-sRNA|Val|H|1637|tRH-5|37|CCA	hsa|mt-sRNA|Val|H|1637-CCA	tRNA-half-5	CCA_0_mismatch	Mt_tRNA	H	sense	Val	within gene boundary	1637	1670	1602	1670	CCA
CTTAACTTGACCGCTCTGACCA	170.228	-3.32767	0.872733	-3.81293	0.000137331	0.00451617	hsa|mt-sRNA|Val|H|1652|tRF-5|22|CCA	hsa|mt-sRNA|Val|H|1652-CCA	tRF-5	CCA_0_mismatch	Mt_tRNA	H	sense	Val	within gene boundary	1652	1670	1602	1670	CCA
GATGGTTTTTCATATCATTGGTCGTGGTTGTAGTCCGTGCGAGAATACCA	54.741	-3.07342	1.03439	-2.97125	0.00296591	0.0297481	hsa|mt-sRNA|Glu|L|14674|tRF-3|50|CCA	hsa|mt-sRNA|Glu|L|14674-CCA	tRF-3	CCA_0_mismatch	Mt_tRNA	L	sense	Glu	within gene boundary	14674	14720	14674	14742	CCA
GATTTCAACTTAACTTGACCGCTCTGACCA	480.447	-3.41406	0.803033	-4.25145	2.12388e-05	0.0017042	hsa|mt-sRNA|Val|H|1644|tRF-5|30|CCA	hsa|mt-sRNA|Val|H|1644-CCA	tRF-5	CCA_0_mismatch	Mt_tRNA	H	sense	Val	within gene boundary	1644	1670	1602	1670	CCA
GAGAAAGCTCACAAGAACTGCTAACTCACCA	104.961	-1.38653	0.582791	-2.37912	0.017354	0.0897219	hsa|mt-sRNA|Ser2|H|12207|tRH-3|31|CCA	hsa|mt-sRNA|Ser2|H|12207-CCA	tRNA-half-3	CCA_0_mismatch	Mt_tRNA	H	sense	Ser2	within gene boundary	12207	12234	12207	12265	CCA
GAGATTTCAACTTAACTTGACCGCTCTGACCA	76.0223	-1.99334	0.636114	-3.13361	0.00172668	0.0206173	hsa|mt-sRNA|Val|H|1642|tRH-5|32|CCA	hsa|mt-sRNA|Val|H|1642-CCA	tRNA-half-5	CCA_0_mismatch	Mt_tRNA	H	sense	Val	within gene boundary	1642	1670	1602	1670	CCA
GGTCGTGGTTGTAGTCCGTGCGAGAATACCA	35.8675	-1.65641	0.699594	-2.36767	0.0179004	0.0902217	hsa|mt-sRNA|Glu|L|14674|tRH-3|31|CCA	hsa|mt-sRNA|Glu|L|14674-CCA	tRNA-half-3	CCA_0_mismatch	Mt_tRNA	L	sense	Glu	within gene boundary	14674	14701	14674	14742	CCA
GTCGTGGTTGTAGTCCGTGCGAGAATACCA	84.3716	-1.80103	0.661705	-2.72181	0.00649263	0.0482379	hsa|mt-sRNA|Glu|L|14674|tRF-3|30|CCA	hsa|mt-sRNA|Glu|L|14674-CCA	tRF-3	CCA_0_mismatch	Mt_tRNA	L	sense	Glu	within gene boundary	14674	14700	14674	14742	CCA
GTGGTTGTAGTCCGTGCGAGAATACCA	3241.36	-2.47087	0.713053	-3.4652	0.00052983	0.0105051	hsa|mt-sRNA|Glu|L|14674|tRF-3|27|CCA	hsa|mt-sRNA|Glu|L|14674-CCA	tRF-3	CCA_0_mismatch	Mt_tRNA	L	sense	Glu	within gene boundary	14674	14697	14674	14742	CCA
GTTGTAGTCCGTGCGAGAATACCA	82.2512	-2.20589	0.762746	-2.89204	0.00382747	0.0355459	hsa|mt-sRNA|Glu|L|14674|tRF-3|24|CCA	hsa|mt-sRNA|Glu|L|14674-CCA	tRF-3	CCA_0_mismatch	Mt_tRNA	L	sense	Glu	within gene boundary	14674	14694	14674	14742	CCA
TAACTTGACCGCTCTGACCA	317.189	-3.30104	0.810011	-4.0753	4.59546e-05	0.00284161	hsa|mt-sRNA|Val|H|1654|tRF-5|20|CCA	hsa|mt-sRNA|Val|H|1654-CCA	tRF-5	CCA_0_mismatch	Mt_tRNA	H	sense	Val	within gene boundary	1654	1670	1602	1670	CCA
TATCATTGGTCGTGGTTGTAGTCCGTGCGAGAATACCA	610.511	-1.39223	0.587316	-2.37049	0.0177646	0.0901838	hsa|mt-sRNA|Glu|L|14674|tRF-3|38|CCA	hsa|mt-sRNA|Glu|L|14674-CCA	tRF-3	CCA_0_mismatch	Mt_tRNA	L	sense	Glu	within gene boundary	14674	14708	14674	14742	CCA
TACACTTAGGAGATTTCAACTTAACTTGACCGCTCTGACCA	93.003	-2.06604	0.750722	-2.75207	0.00592201	0.0459222	hsa|mt-sRNA|Val|H|1633|tRF-5|41|CCA	hsa|mt-sRNA|Val|H|1633-CCA	tRF-5	CCA_0_mismatch	Mt_tRNA	H	sense	Val	within gene boundary	1633	1670	1602	1670	CCA
TCAACTTAACTTGACCGCTCTGACCA	463.899	-3.82387	0.834459	-4.58246	4.5954e-06	0.000658456	hsa|mt-sRNA|Val|H|1648|tRF-5|26|CCA	hsa|mt-sRNA|Val|H|1648-CCA	tRF-5	CCA_0_mismatch	Mt_tRNA	H	sense	Val	within gene boundary	1648	1670	1602	1670	CCA
TCATTGGTCGTGGTTGTAGTCCGTGCGAGAATACCA	285.265	-3.48404	0.773508	-4.5042	6.6623e-06	0.000865818	hsa|mt-sRNA|Glu|L|14674|tRH-3|36|CCA	hsa|mt-sRNA|Glu|L|14674-CCA	tRNA-half-3	CCA_0_mismatch	Mt_tRNA	L	sense	Glu	within gene boundary	14674	14706	14674	14742	CCA
TCATATCATTGGTCGTGGTTGTAGTCCGTGCGAGAATACCA	644.423	-3.78576	0.822886	-4.60059	4.21304e-06	0.000650105	hsa|mt-sRNA|Glu|L|14674|tRF-3|41|CCA	hsa|mt-sRNA|Glu|L|14674-CCA	tRF-3	CCA_0_mismatch	Mt_tRNA	L	sense	Glu	within gene boundary	14674	14711	14674	14742	CCA
TCGTGGTTGTAGTCCGTGCGAGAATACCA	2122.07	-2.04575	0.838114	-2.4409	0.0146509	0.0800808	hsa|mt-sRNA|Glu|L|14674|tRF-3|29|CCA	hsa|mt-sRNA|Glu|L|14674-CCA	tRF-3	CCA_0_mismatch	Mt_tRNA	L	sense	Glu	within gene boundary	14674	14699	14674	14742	CCA
TGGTCGTGGTTGTAGTCCGTGCGAGAATACCA	643.673	-1.99146	0.622875	-3.19721	0.00138763	0.0185573	hsa|mt-sRNA|Glu|L|14674|tRH-3|32|CCA	hsa|mt-sRNA|Glu|L|14674-CCA	tRNA-half-3	CCA_0_mismatch	Mt_tRNA	L	sense	Glu	within gene boundary	14674	14702	14674	14742	CCA
TGTAGTCCGTGCGAGAATACCA	89.435	-2.82765	0.839999	-3.36625	0.000761978	0.013177	hsa|mt-sRNA|Glu|L|14674|tRF-3|22|CCA	hsa|mt-sRNA|Glu|L|14674-CCA	tRF-3	CCA_0_mismatch	Mt_tRNA	L	sense	Glu	within gene boundary	14674	14692	14674	14742	CCA
TTAACTTGACCGCTCTGACCA	409.509	-3.6939	0.843321	-4.38018	1.18581e-05	0.00118937	hsa|mt-sRNA|Val|H|1653|tRF-5|21|CCA	hsa|mt-sRNA|Val|H|1653-CCA	tRF-5	CCA_0_mismatch	Mt_tRNA	H	sense	Val	within gene boundary	1653	1670	1602	1670	CCA
TTAACTAAGTGTTTGTGGGTTTAAGTCCCATTGGTCTAGCCA	179.368	-3.33215	0.89282	-3.73217	0.000189838	0.00568382	hsa|mt-sRNA|Asn|L|5657|tRF-3|42|CCA	hsa|mt-sRNA|Asn|L|5657-CCA	tRF-3	CCA_0_mismatch	Mt_tRNA	L	sense	Asn	within gene boundary	5657	5695	5657	5729	CCA
TTAGGAGATTTCAACTTAACTTGACCGCTCTGACCA	28.3411	-1.97679	0.769343	-2.56946	0.0101858	0.0636672	hsa|mt-sRNA|Val|H|1638|tRH-5|36|CCA	hsa|mt-sRNA|Val|H|1638-CCA	tRNA-half-5	CCA_0_mismatch	Mt_tRNA	H	sense	Val	within gene boundary	1638	1670	1602	1670	CCA
TTACACTTAGGAGATTTCAACTTAACTTGACCGCTCTGACCA	88.3898	-2.26465	0.791363	-2.86171	0.00421358	0.0372702	hsa|mt-sRNA|Val|H|1632|tRF-5|42|CCA	hsa|mt-sRNA|Val|H|1632-CCA	tRF-5	CCA_0_mismatch	Mt_tRNA	H	sense	Val	within gene boundary	1632	1670	1602	1670	CCA
TTCAACTTAACTTGACCGCTCTGACCA	258.834	-3.22222	0.806249	-3.99656	6.42705e-05	0.00308072	hsa|mt-sRNA|Val|H|1647|tRF-5|27|CCA	hsa|mt-sRNA|Val|H|1647-CCA	tRF-5	CCA_0_mismatch	Mt_tRNA	H	sense	Val	within gene boundary	1647	1670	1602	1670	CCA
TTCATATCATTGGTCGTGGTTGTAGTCCGTGCGAGAATACCA	179.341	-2.66704	0.91635	-2.9105	0.00360849	0.0342334	hsa|mt-sRNA|Glu|L|14674|tRF-3|42|CCA	hsa|mt-sRNA|Glu|L|14674-CCA	tRF-3	CCA_0_mismatch	Mt_tRNA	L	sense	Glu	within gene boundary	14674	14712	14674	14742	CCA
TTTCATATCATTGGTCGTGGTTGTAGTCCGTGCGAGAATACCA	68.6847	-2.4167	0.768564	-3.14444	0.00166408	0.0201093	hsa|mt-sRNA|Glu|L|14674|tRF-3|43|CCA	hsa|mt-sRNA|Glu|L|14674-CCA	tRF-3	CCA_0_mismatch	Mt_tRNA	L	sense	Glu	within gene boundary	14674	14713	14674	14742	CCA
TTTCAACTTAACTTGACCGCTCTGACCA	492.167	-2.89889	0.815897	-3.55301	0.000380851	0.00858413	hsa|mt-sRNA|Val|H|1646|tRF-5|28|CCA	hsa|mt-sRNA|Val|H|1646-CCA	tRF-5	CCA_0_mismatch	Mt_tRNA	H	sense	Val	within gene boundary	1646	1670	1602	1670	CCA
TTTTCATATCATTGGTCGTGGTTGTAGTCCGTGCGAGAATACCA	88.6503	-1.72038	0.687941	-2.50076	0.0123926	0.0730327	hsa|mt-sRNA|Glu|L|14674|tRF-3|44|CCA	hsa|mt-sRNA|Glu|L|14674-CCA	tRF-3	CCA_0_mismatch	Mt_tRNA	L	sense	Glu	within gene boundary	14674	14714	14674	14742	CCA

## Sheet: hep-B vs uninfected_annot
sequence	baseMean	log2FoldChange	lfcSE	stat	pvalue	padj	Specific-ID	General-ID	subtype	type	bio-type	strand	orientation	annotation	Sequence alignment	Sequence start position(bp)	Sequence end position(bp)	gene-boundary:start(bp)	gene-boundary:end(bp)	substitutions
AAAATGTTTAGACGGGCT	12.3706	-2.36377	0.904896	-2.6122	0.00899625	0.0437664	hsa|mt-sRNA|Phe|H|612|i-tRF-3|18|	hsa|mt-sRNA|Phe|H|612	i-tRF-3	normal_1_mismatch	Mt_tRNA	H	sense	Phe	within gene boundary	612	629	577	647
AAAATGTTTAGACGGGCTC	124.729	-3.51167	1.10467	-3.17893	0.0014782	0.0131363	hsa|mt-sRNA|Phe|H|612|i-tRF-3|19|	hsa|mt-sRNA|Phe|H|612	i-tRF-3	normal_1_mismatch	Mt_tRNA	H	sense	Phe	within gene boundary	612	630	577	647
AAAATGTTTAGACGGGCTCAC	8.74108	-4.88426	1.49076	-3.27635	0.00105157	0.0107827	hsa|mt-sRNA|Phe|H|612|i-tRF-3|21|	hsa|mt-sRNA|Phe|H|612	i-tRF-3	normal_1_mismatch	Mt_tRNA	H	sense	Phe	within gene boundary	612	632	577	647
AAATGTTTAGACGGGCTCAC	7.83042	-3.48214	1.56182	-2.22954	0.025778	0.0967945	hsa|mt-sRNA|Phe|H|613|i-tRF-3|20|	hsa|mt-sRNA|Phe|H|613	i-tRF-3	normal_1_mismatch	Mt_tRNA	H	sense	Phe	within gene boundary	613	632	577	647
AACAGCTAAGGACTG	110.474	-2.96978	1.08522	-2.73656	0.00620847	0.0332365	hsa|mt-sRNA|Ala|H|as5581|i-tRF-5|15|	hsa|mt-sRNA|Ala|H|as5581	i-tRF-5	normal_1_mismatch	Mt_tRNA	H	anti-sense	Ala	overlap gene boundary	5581	5595	5587	5655
AACAGCTAAGGACTGC	227.811	-3.69939	1.14084	-3.24269	0.00118407	0.0116057	hsa|mt-sRNA|Ala|H|as5581|i-tRF-5|16|	hsa|mt-sRNA|Ala|H|as5581	i-tRF-5	normal_1_mismatch	Mt_tRNA	H	anti-sense	Ala	overlap gene boundary	5581	5596	5587	5655
AACAGCTAAGGACTGCA	26.6583	-2.56252	1.03855	-2.4674	0.01361	0.0617079	hsa|mt-sRNA|Ala|H|as5581|i-tRF-5|17|	hsa|mt-sRNA|Ala|H|as5581	i-tRF-5	normal_1_mismatch	Mt_tRNA	H	anti-sense	Ala	overlap gene boundary	5581	5597	5587	5655
AACAGCTAAGGACTGCAAAACC	27.6993	-3.19919	0.778259	-4.1107	3.94467e-05	0.0012961	hsa|mt-sRNA|Ala|H|as5581|i-tRF-5|22|	hsa|mt-sRNA|Ala|H|as5581	i-tRF-5	normal_1_mismatch	Mt_tRNA	H	anti-sense	Ala	overlap gene boundary	5581	5602	5587	5655
AACAGCTAAGGACTGCAAAACCC	38.7451	-3.19201	0.805868	-3.96096	7.46494e-05	0.00216321	hsa|mt-sRNA|Ala|H|as5581|i-tRF-5|23|	hsa|mt-sRNA|Ala|H|as5581	i-tRF-5	normal_1_mismatch	Mt_tRNA	H	anti-sense	Ala	overlap gene boundary	5581	5603	5587	5655
AACAGCTAAGGACTGCAAAACCCC	22.9901	-2.59125	0.751215	-3.44942	0.000561802	0.00748883	hsa|mt-sRNA|Ala|H|as5581|i-tRF-5|24|	hsa|mt-sRNA|Ala|H|as5581	i-tRF-5	normal_1_mismatch	Mt_tRNA	H	anti-sense	Ala	overlap gene boundary	5581	5604	5587	5655
AACAGCTAAGGACTGCAAAACCCCACT	90.891	-1.5565	0.59414	-2.61975	0.0087993	0.043255	hsa|mt-sRNA|Ala|H|as5581|i-tRF-5|27|	hsa|mt-sRNA|Ala|H|as5581	i-tRF-5	normal_1_mismatch	Mt_tRNA	H	anti-sense	Ala	overlap gene boundary	5581	5607	5587	5655
AACCATCGTTGTATTTCAACTACAAGAACACCA	19.072	-2.24694	0.862026	-2.60658	0.00914528	0.044169	hsa|mt-sRNA|Glu|H|as14714|i-tRF-3|33|	hsa|mt-sRNA|Glu|H|as14714	i-tRF-3	normal_1_mismatch	Mt_tRNA	H	anti-sense	Glu	within gene boundary	14714	14746	14674	14742
AACGATGGTTTTTCCTATCATTGGTCGTGGTTGTAGTCCGTGCGAGAATA	16.1549	-7.8254	2.38387	-3.28264	0.00102839	0.0107432	hsa|mt-sRNA|Glu|L|14674|tRF-3|50|35T14	hsa|mt-sRNA|Glu|L|14674	tRF-3	normal_1_mismatch	Mt_tRNA	L	sense	Glu	within gene boundary	14674	14723	14674	14742	35T14
AACTGCTAACTCATGCCCCCATGTCTAACAACATGGCT	14.8294	6.2413	1.68077	3.71335	0.000204533	0.00398453	hsa|mt-sRNA|Ser2|H|12222|i-tRF-5|38|	hsa|mt-sRNA|Ser2|H|12222	i-tRF-5	normal_1_mismatch	Mt_tRNA	H	sense	Ser2	within gene boundary	12222	12259	12207	12265
AACTTACACTTAGGAGATTTCAACTTAACTTGACCGCTCTGAC	53.7751	3.67207	1.23767	2.96692	0.00300803	0.0206686	hsa|mt-sRNA|Val|H|1629|tRF-3|43|42G0	hsa|mt-sRNA|Val|H|1629	tRF-3	normal_1_mismatch	Mt_tRNA	H	sense	Val	within gene boundary	1629	1671	1602	1670	42G0
AACTTACACTTAGGAGATTTCAACTTAACTTGACCGCTCTGACC	336.13	3.40113	1.08376	3.13827	0.0016995	0.0143138	hsa|mt-sRNA|Val|H|1629|tRF-3|44|42G1	hsa|mt-sRNA|Val|H|1629	tRF-3	normal_1_mismatch	Mt_tRNA	H	sense	Val	within gene boundary	1629	1672	1602	1670	42G1
AAGAACTGCTAACTCATGCCCCCATGTCTAACAACATG	12.254	5.02532	1.81379	2.77063	0.00559488	0.0314001	hsa|mt-sRNA|Ser2|H|12219|i-tRF-5|38|	hsa|mt-sRNA|Ser2|H|12219	i-tRF-5	normal_1_mismatch	Mt_tRNA	H	sense	Ser2	within gene boundary	12219	12256	12207	12265
AAGAACTGCTAACTCATGCCCCCATGTCTAACAACATGG	54.9134	6.53509	1.84598	3.54017	0.00039987	0.00623284	hsa|mt-sRNA|Ser2|H|12219|i-tRF-5|39|	hsa|mt-sRNA|Ser2|H|12219	i-tRF-5	normal_1_mismatch	Mt_tRNA	H	sense	Ser2	within gene boundary	12219	12257	12207	12265
AAGAACTGCTAACTCATGCCCCCATGTCTAACAACATGGC	13.8701	6.14032	1.95036	3.14829	0.00164227	0.0140461	hsa|mt-sRNA|Ser2|H|12219|i-tRF-5|40|	hsa|mt-sRNA|Ser2|H|12219	i-tRF-5	normal_1_mismatch	Mt_tRNA	H	sense	Ser2	within gene boundary	12219	12258	12207	12265
AAGAACTGCTAACTCATGCCCCCATGTCTAACAACATGGCA	33.0936	7.40973	1.66811	4.442	8.91264e-06	0.000516545	hsa|mt-sRNA|Ser2|H|12219|i-tRF-5|41|40T0	hsa|mt-sRNA|Ser2|H|12219	i-tRF-5	normal_1_mismatch	Mt_tRNA	H	sense	Ser2	within gene boundary	12219	12259	12207	12265	40T0
AAGAACTGCTAACTCATGCCCCCATGTCTAACAACATGGCT	98.0695	7.04644	1.59363	4.42164	9.79559e-06	0.000544064	hsa|mt-sRNA|Ser2|H|12219|i-tRF-5|41|	hsa|mt-sRNA|Ser2|H|12219	i-tRF-5	normal_1_mismatch	Mt_tRNA	H	sense	Ser2	within gene boundary	12219	12259	12207	12265
AAGAACTGCTAACTCATGCCCCCATGTCTAACAACATGGCTTTCT	31.5013	3.56024	1.34867	2.63981	0.00829525	0.0415698	hsa|mt-sRNA|Ser2|H|12219|tRF-3|45|	hsa|mt-sRNA|Ser2|H|12219	tRF-3	normal_1_mismatch	Mt_tRNA	H	sense	Ser2	within gene boundary	12219	12263	12207	12265
AAGAGAACCAACACCTCTTTACAGTGAC	123.801	-1.72462	0.628982	-2.74192	0.00610806	0.0331231	hsa|mt-sRNA|Lys|H|8338|tRF-3|28|27A0	hsa|mt-sRNA|Lys|H|8338	tRF-3	normal_1_mismatch	Mt_tRNA	H	sense	Lys	within gene boundary	8338	8365	8295	8364	27A0
AAGAGTGTAGCTTAACACAAAGCACCCA	14.9757	-4.71748	1.20064	-3.92914	8.52519e-05	0.00226	hsa|mt-sRNA|Val|H|1602|tRF-5|28|0C27	hsa|mt-sRNA|Val|H|1602	tRF-5	normal_1_mismatch	Mt_tRNA	H	sense	Val	within gene boundary	1602	1629	1602	1670	0C27
AAGCTCACAAGAACTGCTAACTCATGCCCCCATGTCTAACAACATGGCTT	15.8998	3.17475	1.32041	2.40437	0.0162003	0.070572	hsa|mt-sRNA|Ser2|H|12211|i-tRF-5|50|	hsa|mt-sRNA|Ser2|H|12211	i-tRF-5	normal_1_mismatch	Mt_tRNA	H	sense	Ser2	within gene boundary	12211	12260	12207	12265
AAGGTATTGGAAAAACCATTTCATAACTTTGTCAAAGTTA	13.7197	5.16936	1.91736	2.69608	0.00701616	0.0363912	hsa|mt-sRNA|Asp|H|7518|tRF-5|40|8A31	hsa|mt-sRNA|Asp|H|7518	tRF-5	normal_1_mismatch	Mt_tRNA	H	sense	Asp	within gene boundary	7518	7557	7518	7585	8A31
AAGGTATTGGAAAAACCATTTCATAACTTTGTCAAAGTTAAATTATAGGC	27.5335	2.42152	0.924638	2.61889	0.00882172	0.043255	hsa|mt-sRNA|Asp|H|7518|tRF-5|50|8A41	hsa|mt-sRNA|Asp|H|7518	tRF-5	normal_1_mismatch	Mt_tRNA	H	sense	Asp	within gene boundary	7518	7567	7518	7585	8A41
AATGTTTAGACGGGCTCACATCACCC	29.7372	3.76361	1.20614	3.12037	0.00180622	0.0148623	hsa|mt-sRNA|Phe|H|614|i-tRF-3|26|	hsa|mt-sRNA|Phe|H|614	i-tRF-3	normal_1_mismatch	Mt_tRNA	H	sense	Phe	within gene boundary	614	639	577	647
AATGTTTAGACGGGCTCACATCACCCC	13.9692	2.82907	1.095	2.58362	0.00977693	0.0465452	hsa|mt-sRNA|Phe|H|614|i-tRF-3|27|	hsa|mt-sRNA|Phe|H|614	i-tRF-3	normal_1_mismatch	Mt_tRNA	H	sense	Phe	within gene boundary	614	640	577	647
AATGTTTAGACGGGCTCACATCACCCCATA	14.1639	2.98425	1.19705	2.49301	0.0126666	0.0580227	hsa|mt-sRNA|Phe|H|614|i-tRF-3|30|	hsa|mt-sRNA|Phe|H|614	i-tRF-3	normal_1_mismatch	Mt_tRNA	H	sense	Phe	within gene boundary	614	643	577	647
ACAAGAACTGCTAACTCATGCCCCCATGTCTAACAACATGG	22.7855	5.93518	1.83502	3.23439	0.00121902	0.011775	hsa|mt-sRNA|Ser2|H|12217|i-tRF-5|41|	hsa|mt-sRNA|Ser2|H|12217	i-tRF-5	normal_1_mismatch	Mt_tRNA	H	sense	Ser2	within gene boundary	12217	12257	12207	12265
ACAAGAACTGCTAACTCATGCCCCCATGTCTAACAACATGGCT	56.3184	7.37795	1.7042	4.32928	1.49598e-05	0.000717757	hsa|mt-sRNA|Ser2|H|12217|i-tRF-5|43|	hsa|mt-sRNA|Ser2|H|12217	i-tRF-5	normal_1_mismatch	Mt_tRNA	H	sense	Ser2	within gene boundary	12217	12259	12207	12265
ACAAGAACTGCTAACTCATGCCCCCATGTCTAACAACATGGCTTTCT	50.0489	4.58005	1.23411	3.71123	0.000206251	0.00398453	hsa|mt-sRNA|Ser2|H|12217|tRF-3|47|	hsa|mt-sRNA|Ser2|H|12217	tRF-3	normal_1_mismatch	Mt_tRNA	H	sense	Ser2	within gene boundary	12217	12263	12207	12265
ACAAGCACTGCTAACTCATGCCCCCATGTCTAACAACATGGCT	15.887	7.10561	2.44677	2.90408	0.0036834	0.0230515	hsa|mt-sRNA|Ser2|H|12217|i-tRF-5|43|5A37	hsa|mt-sRNA|Ser2|H|12217	i-tRF-5	normal_1_mismatch	Mt_tRNA	H	sense	Ser2	within gene boundary	12217	12259	12207	12265	5A37
ACAAGCACTGCTAACTCATGCCCCCATGTCTAACAACATGGCTTTCT	14.4898	4.30636	1.95224	2.20586	0.0273941	0.0995595	hsa|mt-sRNA|Ser2|H|12217|tRF-3|47|5A41	hsa|mt-sRNA|Ser2|H|12217	tRF-3	normal_1_mismatch	Mt_tRNA	H	sense	Ser2	within gene boundary	12217	12263	12207	12265	5A41
ACCTTTTAAGTTAAAGATTAAGAGAACCAACACCTCTTTACAGTGAC	25.7408	5.19818	1.48117	3.50952	0.000448916	0.00643447	hsa|mt-sRNA|Lys|H|8319|tRF-3|47|46A0	hsa|mt-sRNA|Lys|H|8319	tRF-3	normal_1_mismatch	Mt_tRNA	H	sense	Lys	within gene boundary	8319	8365	8295	8364	46A0
ACGATGGTTTTTCATATCATTGGTCGTGGTTGTAGTCCGTGCGAGAATAC	207.001	-2.76033	1.14415	-2.41256	0.0158408	0.0694743	hsa|mt-sRNA|Glu|L|14673|tRF-3|50|0T49	hsa|mt-sRNA|Glu|L|14673	tRF-3	normal_1_mismatch	Mt_tRNA	L	sense	Glu	overlap gene boundary	14673	14722	14674	14742	0T49
AGAAAGCTCACAAGAACTGCTAACTCATGCCCCCATGTCTAACAACA	129.453	8.02136	1.49377	5.36987	7.87918e-08	2.10059e-05	hsa|mt-sRNA|Ser2|H|12208|tRF-5|47|	hsa|mt-sRNA|Ser2|H|12208	tRF-5	normal_1_mismatch	Mt_tRNA	H	sense	Ser2	within gene boundary	12208	12254	12207	12265
AGAACTGCTAACTCATGCCCCCATGTCTAACAACATGGCT	22.4255	6.83444	1.79916	3.79868	0.000145471	0.00312763	hsa|mt-sRNA|Ser2|H|12220|i-tRF-5|40|	hsa|mt-sRNA|Ser2|H|12220	i-tRF-5	normal_1_mismatch	Mt_tRNA	H	sense	Ser2	within gene boundary	12220	12259	12207	12265
AGCACCCAACTTACACTTAGGAGATTTCAACTTAACTTGACCGCTCTGAC	20.278	3.98131	1.38851	2.86732	0.00413959	0.0254289	hsa|mt-sRNA|Val|H|1622|tRF-3|50|49G0	hsa|mt-sRNA|Val|H|1622	tRF-3	normal_1_mismatch	Mt_tRNA	H	sense	Val	within gene boundary	1622	1671	1602	1670	49G0
AGATTGTGAATCTGACAACAGAGGCTTACGACCCCTT	7.27861	2.51966	1.13943	2.21134	0.0270125	0.0995595	hsa|mt-sRNA|His|H|12163|i-tRF-5|37|	hsa|mt-sRNA|His|H|12163	i-tRF-5	normal_1_mismatch	Mt_tRNA	H	sense	His	within gene boundary	12163	12199	12138	12206
AGATTTCAACTTAACTTGACCGCTCTGAC	267.044	3.64643	1.18578	3.07513	0.00210408	0.0162124	hsa|mt-sRNA|Val|H|1643|tRF-3|29|28G0	hsa|mt-sRNA|Val|H|1643	tRF-3	normal_1_mismatch	Mt_tRNA	H	sense	Val	within gene boundary	1643	1671	1602	1670	28G0
AGATTTCAACTTAACTTGACCGCTCTGACC	1577.04	3.09518	1.04806	2.95325	0.00314448	0.0208537	hsa|mt-sRNA|Val|H|1643|tRF-3|30|28G1	hsa|mt-sRNA|Val|H|1643	tRF-3	normal_1_mismatch	Mt_tRNA	H	sense	Val	within gene boundary	1643	1672	1602	1670	28G1
AGCTAAATAAGCTATCGGGCCCA	8.07868	2.82958	1.17932	2.39932	0.0164254	0.0713192	hsa|mt-sRNA|Met|H|4411|i-tRF-5|23|	hsa|mt-sRNA|Met|H|4411	i-tRF-5	normal_1_mismatch	Mt_tRNA	H	sense	Met	within gene boundary	4411	4433	4402	4469
AGGAAGGTCAGCTAAATAAGCTATCGGGCCC	24.9481	-7.72646	2.26705	-3.40815	0.000654049	0.00807691	hsa|mt-sRNA|Met|H|4402|tRF-5|31|2T28	hsa|mt-sRNA|Met|H|4402	tRF-5	normal_1_mismatch	Mt_tRNA	H	sense	Met	within gene boundary	4402	4432	4402	4469	2T28
AGGAGATTTCAACTTAACTTGACCGCTCTGA	57.1099	5.8229	1.95249	2.98229	0.002861	0.0199671	hsa|mt-sRNA|Val|H|1640|tRF-3|31|	hsa|mt-sRNA|Val|H|1640	tRF-3	normal_1_mismatch	Mt_tRNA	H	sense	Val	within gene boundary	1640	1670	1602	1670
AGGAGATTTCAACTTAACTTGACCGCTCTGAC	998.126	5.28379	1.36225	3.87873	0.000105003	0.00264092	hsa|mt-sRNA|Val|H|1640|tRF-3|32|31G0	hsa|mt-sRNA|Val|H|1640	tRF-3	normal_1_mismatch	Mt_tRNA	H	sense	Val	within gene boundary	1640	1671	1602	1670	31G0
AGGAGATTTCAACTTAACTTGACCGCTCTGACC	2365.6	3.83297	1.07834	3.5545	0.000378697	0.00608197	hsa|mt-sRNA|Val|H|1640|tRF-3|33|31G1	hsa|mt-sRNA|Val|H|1640	tRF-3	normal_1_mismatch	Mt_tRNA	H	sense	Val	within gene boundary	1640	1672	1602	1670	31G1
AGTACGGTCAGCTAAATAAGCTATCGGGCCC	16.2412	-5.23972	1.85645	-2.82244	0.00476601	0.0281936	hsa|mt-sRNA|Met|H|4402|tRF-5|31|4A26	hsa|mt-sRNA|Met|H|4402	tRF-5	normal_1_mismatch	Mt_tRNA	H	sense	Met	within gene boundary	4402	4432	4402	4469	4A26
AGTAAGGTCCGCTAAATAAGCTATCGGGCCCATA	35.1725	-8.94675	2.44239	-3.66312	0.000249164	0.0045498	hsa|mt-sRNA|Met|H|4402|tRF-5|34|9A24	hsa|mt-sRNA|Met|H|4402	tRF-5	normal_1_mismatch	Mt_tRNA	H	sense	Met	within gene boundary	4402	4435	4402	4469	9A24
AGTAAGGTCCGCTAAATAAGCTATCGGGCCCATACCCCGAAAATGTTGGT	52.251	-6.39618	1.90651	-3.35491	0.000793913	0.00928321	hsa|mt-sRNA|Met|H|4402|tRF-5|50|9A40	hsa|mt-sRNA|Met|H|4402	tRF-5	normal_1_mismatch	Mt_tRNA	H	sense	Met	within gene boundary	4402	4451	4402	4469	9A40
AGTAAGGTCAGCTACATAAGCTATCGGGC	14.1746	-7.63519	2.37031	-3.22118	0.00127664	0.0118889	hsa|mt-sRNA|Met|H|4402|tRF-5|29|14A14	hsa|mt-sRNA|Met|H|4402	tRF-5	normal_1_mismatch	Mt_tRNA	H	sense	Met	within gene boundary	4402	4430	4402	4469	14A14
AGTAAGGTCAGCTACATAAGCTATCGGGCC	10.9734	-7.2671	2.35169	-3.09016	0.00200046	0.0157788	hsa|mt-sRNA|Met|H|4402|tRF-5|30|14A15	hsa|mt-sRNA|Met|H|4402	tRF-5	normal_1_mismatch	Mt_tRNA	H	sense	Met	within gene boundary	4402	4431	4402	4469	14A15
AGTAAGGTCAGCTACATAAGCTATCGGGCCC	125.577	-25.1363	2.60043	-9.66621	4.19623e-22	2.79679e-19	hsa|mt-sRNA|Met|H|4402|tRF-5|31|14A16	hsa|mt-sRNA|Met|H|4402	tRF-5	normal_1_mismatch	Mt_tRNA	H	sense	Met	within gene boundary	4402	4432	4402	4469	14A16
AGTAAGGTCAGCTACATAAGCTATCGGGCCCA	11.044	-7.2756	2.3511	-3.09455	0.00197114	0.0157337	hsa|mt-sRNA|Met|H|4402|tRF-5|32|14A17	hsa|mt-sRNA|Met|H|4402	tRF-5	normal_1_mismatch	Mt_tRNA	H	sense	Met	within gene boundary	4402	4433	4402	4469	14A17
AGTAAGGTCAGCTACATAAGCTATCGGGCCCATA	11.466	-7.32984	2.35287	-3.11528	0.00183769	0.0149368	hsa|mt-sRNA|Met|H|4402|tRF-5|34|14A19	hsa|mt-sRNA|Met|H|4402	tRF-5	normal_1_mismatch	Mt_tRNA	H	sense	Met	within gene boundary	4402	4435	4402	4469	14A19
AGTAAGGTCAGCTACATAAGCTATCGGGCCCATACCCCGAAAATGTTGGT	21.8872	-8.26361	2.42476	-3.40801	0.000654393	0.00807691	hsa|mt-sRNA|Met|H|4402|tRF-5|50|14A35	hsa|mt-sRNA|Met|H|4402	tRF-5	normal_1_mismatch	Mt_tRNA	H	sense	Met	within gene boundary	4402	4451	4402	4469	14A35
AGTAAGGTCCGCTAAATAAGCTATCGGGC	27.4699	-8.59005	2.42138	-3.54758	0.000388781	0.00616959	hsa|mt-sRNA|Met|H|4402|tRF-5|29|9A19	hsa|mt-sRNA|Met|H|4402	tRF-5	normal_1_mismatch	Mt_tRNA	H	sense	Met	within gene boundary	4402	4430	4402	4469	9A19
AGTAAGGTCCGCTAAATAAGCTATCGGGCC	28.4068	-7.91385	2.24307	-3.52813	0.000418503	0.00626814	hsa|mt-sRNA|Met|H|4402|tRF-5|30|9A20	hsa|mt-sRNA|Met|H|4402	tRF-5	normal_1_mismatch	Mt_tRNA	H	sense	Met	within gene boundary	4402	4431	4402	4469	9A20
AGTAAGGTCCGCTAAATAAGCTATCGGGCCC	262.327	-7.97675	1.74491	-4.57144	4.84379e-06	0.00033983	hsa|mt-sRNA|Met|H|4402|tRF-5|31|9A21	hsa|mt-sRNA|Met|H|4402	tRF-5	normal_1_mismatch	Mt_tRNA	H	sense	Met	within gene boundary	4402	4432	4402	4469	9A21
AGTAAGGTCCGCTAAATAAGCTATCGGGCCCA	26.6813	-5.86284	1.84111	-3.1844	0.00145055	0.0129771	hsa|mt-sRNA|Met|H|4402|tRF-5|32|9A22	hsa|mt-sRNA|Met|H|4402	tRF-5	normal_1_mismatch	Mt_tRNA	H	sense	Met	within gene boundary	4402	4433	4402	4469	9A22
AGTCAGGTCAGCTAAATAAGCTATCGGGCCC	35.4505	-6.88911	1.8918	-3.64157	0.000270981	0.00472926	hsa|mt-sRNA|Met|H|4402|tRF-5|31|3A27	hsa|mt-sRNA|Met|H|4402	tRF-5	normal_1_mismatch	Mt_tRNA	H	sense	Met	within gene boundary	4402	4432	4402	4469	3A27
AGTAAGGTCAGCTAAATAAGCTATCGGGCCCCTA	10.4807	4.22819	1.16008	3.64474	0.000267657	0.00472926	hsa|mt-sRNA|Met|H|4402|tRF-5|34|31A2	hsa|mt-sRNA|Met|H|4402	tRF-5	normal_1_mismatch	Mt_tRNA	H	sense	Met	within gene boundary	4402	4435	4402	4469	31A2
AGTAAGGTCAGCTAAATAAGCTATCGGGCCCG	14.8719	3.65823	1.36655	2.67699	0.00742861	0.0377952	hsa|mt-sRNA|Met|H|4402|tRF-5|32|31A0	hsa|mt-sRNA|Met|H|4402	tRF-5	normal_1_mismatch	Mt_tRNA	H	sense	Met	within gene boundary	4402	4433	4402	4469	31A0
AGTAAGGTCAGCTAAATAAGCTATCGGGCCTA	21.918	-1.76518	0.744528	-2.37087	0.0177463	0.0744402	hsa|mt-sRNA|Met|H|4402|tRF-5|32|30C1	hsa|mt-sRNA|Met|H|4402	tRF-5	normal_1_mismatch	Mt_tRNA	H	sense	Met	within gene boundary	4402	4433	4402	4469	30C1
AGTAAGGTCAGCTAAATAAGCTATCGGGCCCATACCCCG	13.1459	3.19392	1.19942	2.66289	0.00774738	0.0392672	hsa|mt-sRNA|Met|H|4402|tRF-5|39|	hsa|mt-sRNA|Met|H|4402	tRF-5	normal_1_mismatch	Mt_tRNA	H	sense	Met	within gene boundary	4402	4440	4402	4469
AGTAAGGTCAGCTAAATAAGCTATCGGGCCCATACCCCGA	278.747	6.03683	1.25944	4.79326	1.64089e-06	0.000156236	hsa|mt-sRNA|Met|H|4402|tRF-5|40|	hsa|mt-sRNA|Met|H|4402	tRF-5	normal_1_mismatch	Mt_tRNA	H	sense	Met	within gene boundary	4402	4441	4402	4469
AGTAAGGTCAGCTAAATAAGCTATCGGGCCCATACCCCGAA	41.0113	5.48584	1.79281	3.05991	0.00221406	0.0168648	hsa|mt-sRNA|Met|H|4402|tRF-5|41|	hsa|mt-sRNA|Met|H|4402	tRF-5	normal_1_mismatch	Mt_tRNA	H	sense	Met	within gene boundary	4402	4442	4402	4469
AGTAAGGTCAGCTAAATAAGCTATCGGGCCCATACCCCGAAAATGT	258.727	4.15601	1.09167	3.80702	0.000140652	0.00307359	hsa|mt-sRNA|Met|H|4402|tRF-5|46|	hsa|mt-sRNA|Met|H|4402	tRF-5	normal_1_mismatch	Mt_tRNA	H	sense	Met	within gene boundary	4402	4447	4402	4469
AGTAAGGTCAGCTAAATAAGCTATCGGGCCCATACCCCGAAAATGTA	15.8199	3.39025	1.20218	2.82008	0.00480116	0.0281936	hsa|mt-sRNA|Met|H|4402|tRF-5|47|46T0	hsa|mt-sRNA|Met|H|4402	tRF-5	normal_1_mismatch	Mt_tRNA	H	sense	Met	within gene boundary	4402	4448	4402	4469	46T0
AGTAAGGTCAGCTAAATAAGCTATCGGGCCCATACCCCGAAAATGTTGGC	14.6657	5.11166	1.49702	3.41456	0.000638841	0.00807691	hsa|mt-sRNA|Met|H|4402|tRF-5|50|49T0	hsa|mt-sRNA|Met|H|4402	tRF-5	normal_1_mismatch	Mt_tRNA	H	sense	Met	within gene boundary	4402	4451	4402	4469	49T0
AGTAAGGTCAGCTAAATAAGCTATCGGGCCCC	63.4831	4.65466	0.952849	4.88499	1.03433e-06	0.000124315	hsa|mt-sRNA|Met|H|4402|tRF-5|32|31A0	hsa|mt-sRNA|Met|H|4402	tRF-5	normal_1_mismatch	Mt_tRNA	H	sense	Met	within gene boundary	4402	4433	4402	4469	31A0
AGTGTTTGTGGGTTTAAGTCCCATTGGTCTAGC	66.8468	4.8281	1.68887	2.85878	0.00425276	0.0257678	hsa|mt-sRNA|Asn|L|5656|tRF-3|33|0A32	hsa|mt-sRNA|Asn|L|5656	tRF-3	normal_1_mismatch	Mt_tRNA	L	sense	Asn	overlap gene boundary	5656	5688	5657	5729	0A32
ATCCATTGGTCTTAG	12.5378	2.12041	0.932962	2.27277	0.0230398	0.0898014	hsa|mt-sRNA|Leu2|H|12286|i-tRF-5|15|	hsa|mt-sRNA|Leu2|H|12286	i-tRF-5	normal_1_mismatch	Mt_tRNA	H	sense	Leu2	within gene boundary	12286	12300	12266	12336
ATGGTTTTTCATATCATTGGTCGTGGTTGTAGTCCGTGCGAGAATA	1128	6.11305	1.36056	4.49303	7.02168e-06	0.00044309	hsa|mt-sRNA|Glu|L|14674|tRF-3|46|	hsa|mt-sRNA|Glu|L|14674	tRF-3	normal_1_mismatch	Mt_tRNA	L	sense	Glu	within gene boundary	14674	14719	14674	14742
ATTGGTCGTCGTTGTAGTCCGTGCGAGAATA	18.7373	4.41302	1.69536	2.60299	0.00924137	0.044472	hsa|mt-sRNA|Glu|L|14674|tRF-3|31|21C9	hsa|mt-sRNA|Glu|L|14674	tRF-3	normal_1_mismatch	Mt_tRNA	L	sense	Glu	within gene boundary	14674	14704	14674	14742	21C9
ATTGGTCGTGGTTGTAGTCCGTGCGAGAATA	1620.28	5.10757	1.43157	3.56781	0.000359983	0.00592417	hsa|mt-sRNA|Glu|L|14674|tRF-3|31|	hsa|mt-sRNA|Glu|L|14674	tRF-3	normal_1_mismatch	Mt_tRNA	L	sense	Glu	within gene boundary	14674	14704	14674	14742
CAAGAACTGCTAACTCATGCCCCCATGTCTAACAACATGGCTTTCT	28.1058	4.00575	1.27066	3.1525	0.00161878	0.0140461	hsa|mt-sRNA|Ser2|H|12218|tRF-3|46|	hsa|mt-sRNA|Ser2|H|12218	tRF-3	normal_1_mismatch	Mt_tRNA	H	sense	Ser2	within gene boundary	12218	12263	12207	12265
CAAGACCTGCTAACTCATGCCCCCATGTCTAACAACATGGCTTTCT	7.27196	5.18685	1.61045	3.22074	0.0012786	0.0118889	hsa|mt-sRNA|Ser2|H|12218|tRF-3|46|5A40	hsa|mt-sRNA|Ser2|H|12218	tRF-3	normal_1_mismatch	Mt_tRNA	H	sense	Ser2	within gene boundary	12218	12263	12207	12265	5A40
CAACTTACACTTAGGAGATTTCAACTTAACTTGACCGCTCTGAC	123.966	3.94375	1.3388	2.94574	0.00322184	0.0211562	hsa|mt-sRNA|Val|H|1628|tRF-3|44|43G0	hsa|mt-sRNA|Val|H|1628	tRF-3	normal_1_mismatch	Mt_tRNA	H	sense	Val	within gene boundary	1628	1671	1602	1670	43G0
CAACTTACACTTAGGAGATTTCAACTTAACTTGACCGCTCTGACC	586.911	3.89454	1.13674	3.42608	0.00061237	0.00792514	hsa|mt-sRNA|Val|H|1628|tRF-3|45|43G1	hsa|mt-sRNA|Val|H|1628	tRF-3	normal_1_mismatch	Mt_tRNA	H	sense	Val	within gene boundary	1628	1672	1602	1670	43G1
CAAGAACTGCTAACTCATGCCCCCATGTCTAACAACATGGCT	16.596	6.40062	1.96665	3.25458	0.00113562	0.0112132	hsa|mt-sRNA|Ser2|H|12218|i-tRF-5|42|	hsa|mt-sRNA|Ser2|H|12218	i-tRF-5	normal_1_mismatch	Mt_tRNA	H	sense	Ser2	within gene boundary	12218	12259	12207	12265
CACAAGAACTGCTAACTCATGCCCCCATGTCTAACAACATGGCT	11.2354	6.6082	1.99559	3.31139	0.000928326	0.0103122	hsa|mt-sRNA|Ser2|H|12216|i-tRF-5|44|	hsa|mt-sRNA|Ser2|H|12216	i-tRF-5	normal_1_mismatch	Mt_tRNA	H	sense	Ser2	within gene boundary	12216	12259	12207	12265
CACTGTAAAGCTAACTTAGCATTAACCTTTTAAGTTAAAGATTAAG	11.252	2.99797	1.25515	2.38852	0.0169162	0.0722732	hsa|mt-sRNA|Lys|H|8295|tRF-5|46|	hsa|mt-sRNA|Lys|H|8295	tRF-5	normal_1_mismatch	Mt_tRNA	H	sense	Lys	within gene boundary	8295	8340	8295	8364
CACTGTAAAGCTAACTTAGCATTAACCTTTTAAGTTAAAGATTAAGA	30.7356	1.92676	0.805874	2.39089	0.0168076	0.0722725	hsa|mt-sRNA|Lys|H|8295|tRF-5|47|	hsa|mt-sRNA|Lys|H|8295	tRF-5	normal_1_mismatch	Mt_tRNA	H	sense	Lys	within gene boundary	8295	8341	8295	8364
CACTGTCAAGCTAACTTAGCATTAACCTTTTAAGTTAAAGATTAAGAGAA	15.9437	-7.80674	2.39333	-3.26187	0.0011068	0.0110156	hsa|mt-sRNA|Lys|H|8295|tRF-5|50|6A43	hsa|mt-sRNA|Lys|H|8295	tRF-5	normal_1_mismatch	Mt_tRNA	H	sense	Lys	within gene boundary	8295	8344	8295	8364	6A43
CACTGTAATGCTAACTTAGCATTAACCTTTTAAGTTAAAGATTAAG	14.3015	2.40797	0.897582	2.68273	0.00730239	0.0374388	hsa|mt-sRNA|Lys|H|8295|tRF-5|46|8A37	hsa|mt-sRNA|Lys|H|8295	tRF-5	normal_1_mismatch	Mt_tRNA	H	sense	Lys	within gene boundary	8295	8340	8295	8364	8A37
CACTGTAATGCTAACTTAGCATTAACCTTTTAAGTTAAAGATTAAGA	20.2599	2.25412	0.755428	2.9839	0.00284603	0.0199671	hsa|mt-sRNA|Lys|H|8295|tRF-5|47|8A38	hsa|mt-sRNA|Lys|H|8295	tRF-5	normal_1_mismatch	Mt_tRNA	H	sense	Lys	within gene boundary	8295	8341	8295	8364	8A38
CACTGTAAGGCTAACTTAGCATTAACCTTTTAAGTTAAAGATTAAG	23.5975	2.471	0.888127	2.78226	0.00539816	0.0306202	hsa|mt-sRNA|Lys|H|8295|tRF-5|46|8A37	hsa|mt-sRNA|Lys|H|8295	tRF-5	normal_1_mismatch	Mt_tRNA	H	sense	Lys	within gene boundary	8295	8340	8295	8364	8A37
CACTGTAAGGCTAACTTAGCATTAACCTTTTAAGTTAAAGATTAAGA	39.9915	2.66714	0.778448	3.42623	0.000612023	0.00792514	hsa|mt-sRNA|Lys|H|8295|tRF-5|47|8A38	hsa|mt-sRNA|Lys|H|8295	tRF-5	normal_1_mismatch	Mt_tRNA	H	sense	Lys	within gene boundary	8295	8341	8295	8364	8A38
CAGAGTGTAGCTTAACACAAAGCACCCAACTTACACTTAGG	32.9345	2.34041	1.01128	2.31432	0.0206501	0.083162	hsa|mt-sRNA|Val|H|1602|tRF-5|41|	hsa|mt-sRNA|Val|H|1602	tRF-5	normal_1_mismatch	Mt_tRNA	H	sense	Val	within gene boundary	1602	1642	1602	1670
CAGAGTGTGGCTTAACACAAAGCACCCAACTTACACTTAGGAGATTTCAA	36.2104	1.87204	0.815146	2.29657	0.0216436	0.0856109	hsa|mt-sRNA|Val|H|1602|tRF-5|50|8A41	hsa|mt-sRNA|Val|H|1602	tRF-5	normal_1_mismatch	Mt_tRNA	H	sense	Val	within gene boundary	1602	1651	1602	1670	8A41
CAGAGTGTTGCTTAACACAAAGCACCCAACTTACACT	31.6264	1.73107	0.770627	2.24632	0.0246838	0.0948208	hsa|mt-sRNA|Val|H|1602|tRF-5|37|8A28	hsa|mt-sRNA|Val|H|1602	tRF-5	normal_1_mismatch	Mt_tRNA	H	sense	Val	within gene boundary	1602	1638	1602	1670	8A28
CAGAGTGTTGCTTAACACAAAGCACCCAACTTACACTTAGG	33.971	3.53459	1.18519	2.98231	0.00286083	0.0199671	hsa|mt-sRNA|Val|H|1602|tRF-5|41|8A32	hsa|mt-sRNA|Val|H|1602	tRF-5	normal_1_mismatch	Mt_tRNA	H	sense	Val	within gene boundary	1602	1642	1602	1670	8A32
CAGAGTGTTGCTTAACACAAAGCACCCAACTTACACTTAGGAG	44.0823	3.04051	1.02226	2.97431	0.00293645	0.020297	hsa|mt-sRNA|Val|H|1602|tRF-5|43|8A34	hsa|mt-sRNA|Val|H|1602	tRF-5	normal_1_mismatch	Mt_tRNA	H	sense	Val	within gene boundary	1602	1644	1602	1670	8A34
CAGAGTGTTGCTTAACACAAAGCACCCAACTTACACTTAGGAGATTTCAA	217.37	2.03512	0.766312	2.65573	0.00791362	0.0399578	hsa|mt-sRNA|Val|H|1602|tRF-5|50|8A41	hsa|mt-sRNA|Val|H|1602	tRF-5	normal_1_mismatch	Mt_tRNA	H	sense	Val	within gene boundary	1602	1651	1602	1670	8A41
CAGAGTGTAGCTTAACACAAAGCACCCC	16.8873	-3.3851	1.40751	-2.40503	0.0161711	0.070572	hsa|mt-sRNA|Val|H|1602|tRF-5|28|27A0	hsa|mt-sRNA|Val|H|1602	tRF-5	normal_1_mismatch	Mt_tRNA	H	sense	Val	within gene boundary	1602	1629	1602	1670	27A0
CAGAGTGTAGCTTAACCCAAAGCACCCA	77.5173	-24.47	2.51583	-9.72642	2.32641e-22	2.79679e-19	hsa|mt-sRNA|Val|H|1602|tRF-5|28|16A11	hsa|mt-sRNA|Val|H|1602	tRF-5	normal_1_mismatch	Mt_tRNA	H	sense	Val	within gene boundary	1602	1629	1602	1670	16A11
CAGAGTGTAGCTTAACCCAAAGCACCCAA	15.7568	-7.78878	2.37304	-3.2822	0.00103001	0.0107432	hsa|mt-sRNA|Val|H|1602|tRF-5|29|16A12	hsa|mt-sRNA|Val|H|1602	tRF-5	normal_1_mismatch	Mt_tRNA	H	sense	Val	within gene boundary	1602	1630	1602	1670	16A12
CAGAGTGTAGCTTACCACAAAGCACCCA	50.729	-9.47536	2.47384	-3.83022	0.000128027	0.00294242	hsa|mt-sRNA|Val|H|1602|tRF-5|28|14A13	hsa|mt-sRNA|Val|H|1602	tRF-5	normal_1_mismatch	Mt_tRNA	H	sense	Val	within gene boundary	1602	1629	1602	1670	14A13
CAGAGTGTCGCTTAACACAAAGCACCCAACTTACACTTAGGAGATTTCAA	10.2402	2.27519	0.93579	2.4313	0.0150448	0.0670726	hsa|mt-sRNA|Val|H|1602|tRF-5|50|8A41	hsa|mt-sRNA|Val|H|1602	tRF-5	normal_1_mismatch	Mt_tRNA	H	sense	Val	within gene boundary	1602	1651	1602	1670	8A41
CAGCGTGTAGCTTAACACAAAGCACCCA	18.6347	-5.40002	2.2329	-2.41839	0.0155894	0.0690386	hsa|mt-sRNA|Val|H|1602|tRF-5|28|3A24	hsa|mt-sRNA|Val|H|1602	tRF-5	normal_1_mismatch	Mt_tRNA	H	sense	Val	within gene boundary	1602	1629	1602	1670	3A24
CATGCCCCCATGTCTAACAACATGGCT	26.9857	3.31196	1.29476	2.55797	0.0105286	0.0497682	hsa|mt-sRNA|Ser2|H|12233|i-tRF-5|27|	hsa|mt-sRNA|Ser2|H|12233	i-tRF-5	normal_1_mismatch	Mt_tRNA	H	sense	Ser2	within gene boundary	12233	12259	12207	12265
CGGTAATCGCATAAAACTTAAAACTTTACAGTCAGAGGTTCATTTCCTCT	17.6723	4.58043	1.71089	2.67722	0.00742353	0.0377952	hsa|mt-sRNA|Leu|H|3247|i-tRF-5|50|42A7	hsa|mt-sRNA|Leu|H|3247	i-tRF-5	normal_1_mismatch	Mt_tRNA	H	sense	Leu	within gene boundary	3247	3296	3230	3304	42A7
CGTAAGGTCAGCTAAATAAGCTATCGGGCCC	21.33	-7.49878	1.95203	-3.84153	0.000122269	0.00288943	hsa|mt-sRNA|Met|H|4402|tRF-5|31|0A30	hsa|mt-sRNA|Met|H|4402	tRF-5	normal_1_mismatch	Mt_tRNA	H	sense	Met	within gene boundary	4402	4432	4402	4469	0A30
CGTGGTTGTAGTCCGTGCGAGAATA	29.5692	3.95794	1.33476	2.96528	0.00302406	0.0206722	hsa|mt-sRNA|Glu|L|14674|tRF-3|25|	hsa|mt-sRNA|Glu|L|14674	tRF-3	normal_1_mismatch	Mt_tRNA	L	sense	Glu	within gene boundary	14674	14698	14674	14742
CTCACCAGAACTGCTAACTCATGCCCCCATGTCTAACAACATGGCT	22.4758	7.60645	2.01475	3.77538	0.000159766	0.00335798	hsa|mt-sRNA|Ser2|H|12214|i-tRF-5|46|5A40	hsa|mt-sRNA|Ser2|H|12214	i-tRF-5	normal_1_mismatch	Mt_tRNA	H	sense	Ser2	within gene boundary	12214	12259	12207	12265	5A40
CTCACAAGAACTGCTAACTCATGCCCCCATGTCTAACAACATGGCT	76.3406	8.6093	1.95762	4.39785	1.0933e-05	0.000582945	hsa|mt-sRNA|Ser2|H|12214|i-tRF-5|46|	hsa|mt-sRNA|Ser2|H|12214	i-tRF-5	normal_1_mismatch	Mt_tRNA	H	sense	Ser2	within gene boundary	12214	12259	12207	12265
GAAAATGTTTAGACGGGCT	30.5928	-2.10685	0.899151	-2.34315	0.0191217	0.078914	hsa|mt-sRNA|Phe|H|611|i-tRF-5|19|	hsa|mt-sRNA|Phe|H|611	i-tRF-5	normal_1_mismatch	Mt_tRNA	H	sense	Phe	within gene boundary	611	629	577	647
GAAAATGTTTAGACGGGCTC	353.704	-3.79596	1.07803	-3.5212	0.000429594	0.00631034	hsa|mt-sRNA|Phe|H|611|i-tRF-5|20|	hsa|mt-sRNA|Phe|H|611	i-tRF-5	normal_1_mismatch	Mt_tRNA	H	sense	Phe	within gene boundary	611	630	577	647
GAAAATGTTTAGACGGGCTCAC	23.0281	-3.0163	0.946276	-3.18755	0.00143485	0.0129234	hsa|mt-sRNA|Phe|H|611|i-tRF-5|22|	hsa|mt-sRNA|Phe|H|611	i-tRF-5	normal_1_mismatch	Mt_tRNA	H	sense	Phe	within gene boundary	611	632	577	647
GAAAATGTTTAGACGGGC	26.3466	-2.59621	1.12709	-2.30347	0.0212526	0.0845662	hsa|mt-sRNA|Phe|H|611|i-tRF-5|18|	hsa|mt-sRNA|Phe|H|611	i-tRF-5	normal_1_mismatch	Mt_tRNA	H	sense	Phe	within gene boundary	611	628	577	647
GAAATACAACGATGGTTTTTCATATCATTGGTCGTGGTTGTA	10.1078	4.23744	1.55188	2.73051	0.00632355	0.0333174	hsa|mt-sRNA|Glu|L|14689|i-tRF-3|42|	hsa|mt-sRNA|Glu|L|14689	i-tRF-3	normal_1_mismatch	Mt_tRNA	L	sense	Glu	within gene boundary	14689	14730	14674	14742
GAACTGCTAACTCATGCCCCCATGTCTAACAACATGGCT	25.7974	7.80551	1.79127	4.35752	1.31542e-05	0.000674408	hsa|mt-sRNA|Ser2|H|12221|i-tRF-5|39|	hsa|mt-sRNA|Ser2|H|12221	i-tRF-5	normal_1_mismatch	Mt_tRNA	H	sense	Ser2	within gene boundary	12221	12259	12207	12265
GAACTGCTAACTCATGCCCCCATGTCTAACAACATGGCTTTCTCACC	12.998	3.68338	1.24582	2.95659	0.00311066	0.0207363	hsa|mt-sRNA|Ser2|H|12221|tRF-3|47|45A1	hsa|mt-sRNA|Ser2|H|12221	tRF-3	normal_1_mismatch	Mt_tRNA	H	sense	Ser2	within gene boundary	12221	12267	12207	12265	45A1
GAATGTTTAGACGGGCTCACATCACC	55.0233	2.93446	1.24691	2.35338	0.0186034	0.0772533	hsa|mt-sRNA|Phe|H|613|i-tRF-3|26|0A25	hsa|mt-sRNA|Phe|H|613	i-tRF-3	normal_1_mismatch	Mt_tRNA	H	sense	Phe	within gene boundary	613	638	577	647	0A25
GAATGTTTAGACGGGCTCACATCACCC	22.0316	2.79612	1.13931	2.45422	0.0141189	0.0637984	hsa|mt-sRNA|Phe|H|613|i-tRF-3|27|0A26	hsa|mt-sRNA|Phe|H|613	i-tRF-3	normal_1_mismatch	Mt_tRNA	H	sense	Phe	within gene boundary	613	639	577	647	0A26
GACTATGAGAATCGAACCCATCCCTGAGAATCCAAAATTCTCCGTGCCAC	24.1714	4.64615	1.17927	3.93986	8.15285e-05	0.00226	hsa|mt-sRNA|Gln|H|as4333|i-tRF-5|50|	hsa|mt-sRNA|Gln|H|as4333	i-tRF-5	normal_1_mismatch	Mt_tRNA	H	anti-sense	Gln	within gene boundary	4333	4382	4329	4400
GACTATGAGAATCGAACCCATCCCTGAGAATCCAAAATTCTCCGTGCCAT	25.0762	5.45461	1.48784	3.66612	0.000246256	0.0045498	hsa|mt-sRNA|Gln|H|as4333|i-tRF-5|50|49C0	hsa|mt-sRNA|Gln|H|as4333	i-tRF-5	normal_1_mismatch	Mt_tRNA	H	anti-sense	Gln	within gene boundary	4333	4382	4329	4400	49C0
GAGAAAGCTCACAAGAACTG	825.61	-1.70565	0.623684	-2.7348	0.00624183	0.0332815	hsa|mt-sRNA|Ser2|H|12207|tRF-5|20|	hsa|mt-sRNA|Ser2|H|12207	tRF-5	normal_1_mismatch	Mt_tRNA	H	sense	Ser2	within gene boundary	12207	12226	12207	12265
GAGAACGCTCACAAGAACTGCTAACTCATGCCCCCATGTCTAACAACATG	128.514	7.56423	1.76755	4.2795	1.8731e-05	0.000824927	hsa|mt-sRNA|Ser2|H|12207|tRF-5|50|5A44	hsa|mt-sRNA|Ser2|H|12207	tRF-5	normal_1_mismatch	Mt_tRNA	H	sense	Ser2	within gene boundary	12207	12256	12207	12265	5A44
GAGAGTGTAGCTTAACACAAAGCACCCA	15.0751	-5.06886	1.469	-3.45055	0.000559436	0.00748883	hsa|mt-sRNA|Val|H|1602|tRF-5|28|0C27	hsa|mt-sRNA|Val|H|1602	tRF-5	normal_1_mismatch	Mt_tRNA	H	sense	Val	within gene boundary	1602	1629	1602	1670	0C27
GAGAAAGCTCACAAGAACTGCTAACTC	497.103	-1.72347	0.764645	-2.25394	0.0241997	0.0932317	hsa|mt-sRNA|Ser2|H|12207|tRF-5|27|	hsa|mt-sRNA|Ser2|H|12207	tRF-5	normal_1_mismatch	Mt_tRNA	H	sense	Ser2	within gene boundary	12207	12233	12207	12265
GAGAAAGCTCACAAGAACTGCTAACTCATGCCCCCATGTCTAACAACATG	614.442	4.72573	1.58229	2.98664	0.00282066	0.0199671	hsa|mt-sRNA|Ser2|H|12207|tRF-5|50|	hsa|mt-sRNA|Ser2|H|12207	tRF-5	normal_1_mismatch	Mt_tRNA	H	sense	Ser2	within gene boundary	12207	12256	12207	12265
GAGAAAGCTCACAAGACCTG	41.1389	-9.17307	2.45395	-3.73808	0.000185432	0.00373538	hsa|mt-sRNA|Ser2|H|12207|tRF-5|20|16A3	hsa|mt-sRNA|Ser2|H|12207	tRF-5	normal_1_mismatch	Mt_tRNA	H	sense	Ser2	within gene boundary	12207	12226	12207	12265	16A3
GAGAAAGCTCACAAGACCTGCT	12.8414	-6.76129	2.19246	-3.08388	0.00204319	0.0159273	hsa|mt-sRNA|Ser2|H|12207|tRF-5|22|16A5	hsa|mt-sRNA|Ser2|H|12207	tRF-5	normal_1_mismatch	Mt_tRNA	H	sense	Ser2	within gene boundary	12207	12228	12207	12265	16A5
GAGAAAGCTCACAAGACCTGCTAACT	15.8741	-7.79938	2.37312	-3.28655	0.00101423	0.0107432	hsa|mt-sRNA|Ser2|H|12207|tRF-5|26|16A9	hsa|mt-sRNA|Ser2|H|12207	tRF-5	normal_1_mismatch	Mt_tRNA	H	sense	Ser2	within gene boundary	12207	12232	12207	12265	16A9
GAGAAAGCTCACAAGACCTGCTAACTC	34.9592	-8.93859	2.44866	-3.6504	0.000261833	0.00471653	hsa|mt-sRNA|Ser2|H|12207|tRF-5|27|16A10	hsa|mt-sRNA|Ser2|H|12207	tRF-5	normal_1_mismatch	Mt_tRNA	H	sense	Ser2	within gene boundary	12207	12233	12207	12265	16A10
GAGAAAGCTCACAAGACCTGCTAACTCATGCC	16.5665	-7.86001	2.38597	-3.29426	0.000986812	0.0106894	hsa|mt-sRNA|Ser2|H|12207|tRF-5|32|16A15	hsa|mt-sRNA|Ser2|H|12207	tRF-5	normal_1_mismatch	Mt_tRNA	H	sense	Ser2	within gene boundary	12207	12238	12207	12265	16A15
GAGCAAGCTCACAAGAACTG	18.0547	-7.25775	2.20459	-3.29212	0.000994364	0.0106894	hsa|mt-sRNA|Ser2|H|12207|tRF-5|20|3A16	hsa|mt-sRNA|Ser2|H|12207	tRF-5	normal_1_mismatch	Mt_tRNA	H	sense	Ser2	within gene boundary	12207	12226	12207	12265	3A16
GAGCAAGCTCACAAGAACTGCTAACT	7.5734	-5.99655	2.14825	-2.79136	0.00524874	0.0301441	hsa|mt-sRNA|Ser2|H|12207|tRF-5|26|3A22	hsa|mt-sRNA|Ser2|H|12207	tRF-5	normal_1_mismatch	Mt_tRNA	H	sense	Ser2	within gene boundary	12207	12232	12207	12265	3A22
GAGCAAGCTCACAAGAACTGCTAACTC	15.4282	-7.75884	2.37668	-3.26458	0.00109628	0.0110156	hsa|mt-sRNA|Ser2|H|12207|tRF-5|27|3A23	hsa|mt-sRNA|Ser2|H|12207	tRF-5	normal_1_mismatch	Mt_tRNA	H	sense	Ser2	within gene boundary	12207	12233	12207	12265	3A23
GCACCCAACTTACACTTAGGAGATTTCAACTTAACTTGACCGCTCTGACC	14.7674	2.63057	1.17384	2.24099	0.0250266	0.095015	hsa|mt-sRNA|Val|H|1623|tRF-3|50|48G1	hsa|mt-sRNA|Val|H|1623	tRF-3	normal_1_mismatch	Mt_tRNA	H	sense	Val	within gene boundary	1623	1672	1602	1670	48G1
GCTCACAAGAACTGCTAACTCATGCCCCCATGTCTAACAACATGGCTTTC	10.3036	3.06074	1.36639	2.24001	0.0250902	0.095015	hsa|mt-sRNA|Ser2|H|12213|tRF-3|50|	hsa|mt-sRNA|Ser2|H|12213	tRF-3	normal_1_mismatch	Mt_tRNA	H	sense	Ser2	within gene boundary	12213	12262	12207	12265
GGAAAAATGGCTGAGTGAAGCATTGGACTGTA	24.4954	-5.9151	1.78187	-3.3196	0.000901479	0.0101837	hsa|mt-sRNA|Tyr|L|5860|tRF-5|32|29A2	hsa|mt-sRNA|Tyr|L|5860	tRF-5	normal_1_mismatch	Mt_tRNA	L	sense	Tyr	within gene boundary	5860	5891	5826	5891	29A2
GGAGATTTCAACTTAACTTGACCGCTCTGAC	219.526	4.97972	1.28889	3.86357	0.000111742	0.00275838	hsa|mt-sRNA|Val|H|1641|tRF-3|31|30G0	hsa|mt-sRNA|Val|H|1641	tRF-3	normal_1_mismatch	Mt_tRNA	H	sense	Val	within gene boundary	1641	1671	1602	1670	30G0
GGAGATTTCAACTTAACTTGACCGCTCTGACC	449.586	4.15345	0.988014	4.20384	2.62427e-05	0.00099947	hsa|mt-sRNA|Val|H|1641|tRF-3|32|30G1	hsa|mt-sRNA|Val|H|1641	tRF-3	normal_1_mismatch	Mt_tRNA	H	sense	Val	within gene boundary	1641	1672	1602	1670	30G1
GGACTATGAGAATCGAACCCATCCCTGAGAATCCAAAATTCTCC	9.66383	4.36283	1.75159	2.49078	0.0127463	0.0581876	hsa|mt-sRNA|Gln|H|as4332|tRF-5|44|	hsa|mt-sRNA|Gln|H|as4332	tRF-5	normal_1_mismatch	Mt_tRNA	H	anti-sense	Gln	within gene boundary	4332	4375	4329	4400
GGACTATGAGAATCGAACCCATCCCTGAGAATCCAAAATTCTCCGA	17.1848	2.66563	0.950236	2.80523	0.00502808	0.0290149	hsa|mt-sRNA|Gln|H|as4332|tRF-5|46|45T0	hsa|mt-sRNA|Gln|H|as4332	tRF-5	normal_1_mismatch	Mt_tRNA	H	anti-sense	Gln	within gene boundary	4332	4377	4329	4400	45T0
GGACTATGAGAATCGAACCCATCCCTGAGAATCCAAAATTCTCCGT	16.3144	3.08956	1.39827	2.20955	0.0271361	0.0995595	hsa|mt-sRNA|Gln|H|as4332|tRF-5|46|	hsa|mt-sRNA|Gln|H|as4332	tRF-5	normal_1_mismatch	Mt_tRNA	H	anti-sense	Gln	within gene boundary	4332	4377	4329	4400
GGACTATGAGAATCGAACCCATCCCTGAGAATCCAAAATTCTCCGTA	22.7531	2.52026	0.840781	2.99753	0.00272178	0.0197181	hsa|mt-sRNA|Gln|H|as4332|tRF-5|47|46G0	hsa|mt-sRNA|Gln|H|as4332	tRF-5	normal_1_mismatch	Mt_tRNA	H	anti-sense	Gln	within gene boundary	4332	4378	4329	4400	46G0
GGACTATGAGAATCGAACCCATCCCTGAGAATCCAAAATTCTCCGTGCCA	213.749	3.69574	1.09406	3.37802	0.000730103	0.00876782	hsa|mt-sRNA|Gln|H|as4332|tRF-5|50|	hsa|mt-sRNA|Gln|H|as4332	tRF-5	normal_1_mismatch	Mt_tRNA	H	anti-sense	Gln	within gene boundary	4332	4381	4329	4400
GGCAAAATGGCTGAGTGAAGCATTGGACTGTA	9.76992	-5.32301	1.94152	-2.74167	0.00611274	0.0331231	hsa|mt-sRNA|Tyr|L|5860|tRF-5|32|29A2	hsa|mt-sRNA|Tyr|L|5860	tRF-5	normal_1_mismatch	Mt_tRNA	L	sense	Tyr	within gene boundary	5860	5891	5826	5891	29A2
GGACTATGAGAATCGAACCCATCCCTGAGAATCCAAAATTCTCCGTGCCT	46.8729	3.84049	1.21997	3.14802	0.00164381	0.0140461	hsa|mt-sRNA|Gln|H|as4332|tRF-5|50|49A0	hsa|mt-sRNA|Gln|H|as4332	tRF-5	normal_1_mismatch	Mt_tRNA	H	anti-sense	Gln	within gene boundary	4332	4381	4329	4400	49A0
GGACTATGAGAATCGAACCCATCCCTGAGCATCCAAAATTCTCCGTGCCA	13.8228	6.90634	2.00807	3.4393	0.00058322	0.00769735	hsa|mt-sRNA|Gln|H|as4332|tRF-5|50|29A20	hsa|mt-sRNA|Gln|H|as4332	tRF-5	normal_1_mismatch	Mt_tRNA	H	anti-sense	Gln	within gene boundary	4332	4381	4329	4400	29A20
GGACTCTGAGAATCGAACCCATCCCTGAGAATCCAAAATTCTCCGTG	12.6977	5.57675	1.78938	3.11657	0.00182965	0.0149368	hsa|mt-sRNA|Gln|H|as4332|tRF-5|47|5A41	hsa|mt-sRNA|Gln|H|as4332	tRF-5	normal_1_mismatch	Mt_tRNA	H	anti-sense	Gln	within gene boundary	4332	4378	4329	4400	5A41
GGACTCTGAGAATCGAACCCATCCCTGAGAATCCAAAATTCTCCGTGCCA	46.6121	5.27018	1.34052	3.93146	8.4433e-05	0.00226	hsa|mt-sRNA|Gln|H|as4332|tRF-5|50|5A44	hsa|mt-sRNA|Gln|H|as4332	tRF-5	normal_1_mismatch	Mt_tRNA	H	anti-sense	Gln	within gene boundary	4332	4381	4329	4400	5A44
GGGAAAATGGCTGAGTGAAGCATTGGACTGTA	31.8256	-8.07566	2.26144	-3.57102	0.00035559	0.00592417	hsa|mt-sRNA|Tyr|L|5860|tRF-5|32|29A2	hsa|mt-sRNA|Tyr|L|5860	tRF-5	normal_1_mismatch	Mt_tRNA	L	sense	Tyr	within gene boundary	5860	5891	5826	5891	29A2
GGTAAAATAGCTGAGTGAAGCATTGGACTGTA	321.077	-1.47153	0.609919	-2.41267	0.0158363	0.0694743	hsa|mt-sRNA|Tyr|L|5860|tRF-5|32|23C8	hsa|mt-sRNA|Tyr|L|5860	tRF-5	normal_1_mismatch	Mt_tRNA	L	sense	Tyr	within gene boundary	5860	5891	5826	5891	23C8
GGTAAAATCGCTGAGTGAAGCATTGGACTGTA	335.463	-1.63679	0.62511	-2.61841	0.00883413	0.043255	hsa|mt-sRNA|Tyr|L|5860|tRF-5|32|23C8	hsa|mt-sRNA|Tyr|L|5860	tRF-5	normal_1_mismatch	Mt_tRNA	L	sense	Tyr	within gene boundary	5860	5891	5826	5891	23C8
GGTAAACTGGCTGAGTGAAGCATTGGACTGTA	105.344	-9.80694	2.01235	-4.87338	1.09704e-06	0.000124315	hsa|mt-sRNA|Tyr|L|5860|tRF-5|32|25T6	hsa|mt-sRNA|Tyr|L|5860	tRF-5	normal_1_mismatch	Mt_tRNA	L	sense	Tyr	within gene boundary	5860	5891	5826	5891	25T6
GGTAAAATTGCTGAGTGAAGCATTGGACTGTA	916.574	-1.45005	0.609067	-2.38077	0.0172764	0.0735765	hsa|mt-sRNA|Tyr|L|5860|tRF-5|32|23C8	hsa|mt-sRNA|Tyr|L|5860	tRF-5	normal_1_mismatch	Mt_tRNA	L	sense	Tyr	within gene boundary	5860	5891	5826	5891	23C8
GGTAAAATTGCTGAGTGAAGCATTGGACTGTAA	13.5163	-3.74766	1.06508	-3.51866	0.00043374	0.00631034	hsa|mt-sRNA|Tyr|L|5859|tRF-5|33|24C8	hsa|mt-sRNA|Tyr|L|5859	tRF-5	normal_1_mismatch	Mt_tRNA	L	sense	Tyr	within gene boundary	5859	5891	5826	5891	24C8
GGTAAAATGGCTGAGTGAAGCATTGGACTGCA	276.715	-2.22459	0.764944	-2.90818	0.00363544	0.0228587	hsa|mt-sRNA|Tyr|L|5860|tRF-5|32|1A30	hsa|mt-sRNA|Tyr|L|5860	tRF-5	normal_1_mismatch	Mt_tRNA	L	sense	Tyr	within gene boundary	5860	5891	5826	5891	1A30
GGTAAAATGGCTGAGTGAAGCATTGGACTGTA	2839.54	-1.44602	0.615922	-2.34773	0.0188884	0.0781932	hsa|mt-sRNA|Tyr|L|5860|tRF-5|32|	hsa|mt-sRNA|Tyr|L|5860	tRF-5	normal_1_mismatch	Mt_tRNA	L	sense	Tyr	within gene boundary	5860	5891	5826	5891
GGTAAAATGGCTGAGTGAAGCATTGGACTGTAA	42.4417	-2.56772	0.930005	-2.76098	0.00576286	0.0318751	hsa|mt-sRNA|Tyr|L|5859|tRF-5|33|	hsa|mt-sRNA|Tyr|L|5859	tRF-5	normal_1_mismatch	Mt_tRNA	L	sense	Tyr	within gene boundary	5859	5891	5826	5891
GGTAAAATGGCTGAGTGAAGCATTGGACTGTAAA	18.4182	-2.47255	0.987749	-2.50322	0.0123069	0.0571941	hsa|mt-sRNA|Tyr|L|5858|tRF-5|34|	hsa|mt-sRNA|Tyr|L|5858	tRF-5	normal_1_mismatch	Mt_tRNA	L	sense	Tyr	within gene boundary	5858	5891	5826	5891
GGTCAAATGGCTGAGTGAAGCATTGGACTGTA	54.0543	-8.84302	2.10889	-4.19322	2.75021e-05	0.00101834	hsa|mt-sRNA|Tyr|L|5860|tRF-5|32|28T3	hsa|mt-sRNA|Tyr|L|5860	tRF-5	normal_1_mismatch	Mt_tRNA	L	sense	Tyr	within gene boundary	5860	5891	5826	5891	28T3
GGTAAGGTCAGCTAAATAAGCTATCGGGCCC	21.9595	-4.24634	1.31898	-3.21941	0.00128455	0.0118889	hsa|mt-sRNA|Met|H|4402|tRF-5|31|0A30	hsa|mt-sRNA|Met|H|4402	tRF-5	normal_1_mismatch	Mt_tRNA	H	sense	Met	within gene boundary	4402	4432	4402	4469	0A30
GGTACAATGGCTGAGTGAAGCATTGGACTGTA	7.49925	-5.97315	2.17674	-2.74409	0.00606798	0.0331231	hsa|mt-sRNA|Tyr|L|5860|tRF-5|32|27T4	hsa|mt-sRNA|Tyr|L|5860	tRF-5	normal_1_mismatch	Mt_tRNA	L	sense	Tyr	within gene boundary	5860	5891	5826	5891	27T4
GGTTTTTCATATCATTGGTCGTGGTTGTAGTCCGTGCGAGAATA	283.278	5.68557	1.73309	3.2806	0.00103588	0.0107432	hsa|mt-sRNA|Glu|L|14674|tRF-3|44|	hsa|mt-sRNA|Glu|L|14674	tRF-3	normal_1_mismatch	Mt_tRNA	L	sense	Glu	within gene boundary	14674	14717	14674	14742
GTCCTTGTCGTATAAACT	8.08242	3.36975	1.28121	2.63013	0.00853511	0.0426116	hsa|mt-sRNA|Thr|H|15888|tRF-5|18|8A9	hsa|mt-sRNA|Thr|H|15888	tRF-5	normal_1_mismatch	Mt_tRNA	H	sense	Thr	within gene boundary	15888	15905	15888	15953	8A9
GTCCTTGTGGTATAAACT	130.915	2.08033	0.877546	2.37062	0.0177584	0.0744402	hsa|mt-sRNA|Thr|H|15888|tRF-5|18|8A9	hsa|mt-sRNA|Thr|H|15888	tRF-5	normal_1_mismatch	Mt_tRNA	H	sense	Thr	within gene boundary	15888	15905	15888	15953	8A9
GTGGTTGTAGTCCGTGCGAGAATA	73.9347	3.30291	1.49558	2.20845	0.0272131	0.0995595	hsa|mt-sRNA|Glu|L|14674|tRF-3|24|	hsa|mt-sRNA|Glu|L|14674	tRF-3	normal_1_mismatch	Mt_tRNA	L	sense	Glu	within gene boundary	14674	14697	14674	14742
GTGTTTGTGGGTTTAAGTCCCATTGGTCTAGC	55.1553	4.87546	1.47412	3.30736	0.000941784	0.0103752	hsa|mt-sRNA|Asn|L|5656|tRF-3|32|0A31	hsa|mt-sRNA|Asn|L|5656	tRF-3	normal_1_mismatch	Mt_tRNA	L	sense	Asn	overlap gene boundary	5656	5687	5657	5729	0A31
GTTAAGATAGCAGAGCCCGGTAATCGCATAAAACTTA	18.3425	2.61876	0.862956	3.03464	0.00240821	0.0180345	hsa|mt-sRNA|Leu|H|3230|tRH-5|37|8G28	hsa|mt-sRNA|Leu|H|3230	tRNA-half-5	normal_1_mismatch	Mt_tRNA	H	sense	Leu	within gene boundary	3230	3266	3230	3304	8G28
GTTAAGATCGCAGAGCCCGGTAATCGCATAAAACTTA	21.0223	3.12199	0.969284	3.22092	0.00127779	0.0118889	hsa|mt-sRNA|Leu|H|3230|tRH-5|37|8G28	hsa|mt-sRNA|Leu|H|3230	tRNA-half-5	normal_1_mismatch	Mt_tRNA	H	sense	Leu	within gene boundary	3230	3266	3230	3304	8G28
GTTAAGATGGCAGAGCCCGG	23.4485	2.87539	0.941148	3.0552	0.00224914	0.0170347	hsa|mt-sRNA|Leu|H|3230|tRF-5|20|	hsa|mt-sRNA|Leu|H|3230	tRF-5	normal_1_mismatch	Mt_tRNA	H	sense	Leu	within gene boundary	3230	3249	3230	3304
GTTAAGATGGCAGAGCCCGGT	25.5379	2.51985	0.760772	3.31223	0.00092554	0.0103122	hsa|mt-sRNA|Leu|H|3230|tRF-5|21|	hsa|mt-sRNA|Leu|H|3230	tRF-5	normal_1_mismatch	Mt_tRNA	H	sense	Leu	within gene boundary	3230	3250	3230	3304
GTTAAGATGGCAGAGCCCGGTA	35.1824	5.28952	1.11388	4.74874	2.04685e-06	0.000181897	hsa|mt-sRNA|Leu|H|3230|tRF-5|22|	hsa|mt-sRNA|Leu|H|3230	tRF-5	normal_1_mismatch	Mt_tRNA	H	sense	Leu	within gene boundary	3230	3251	3230	3304
GTTAAGATGGCAGAGCCCGGTAA	10.3516	4.19004	1.32751	3.15632	0.00159775	0.0140461	hsa|mt-sRNA|Leu|H|3230|tRF-5|23|	hsa|mt-sRNA|Leu|H|3230	tRF-5	normal_1_mismatch	Mt_tRNA	H	sense	Leu	within gene boundary	3230	3252	3230	3304
GTTAAGATGGCAGAGCCCGGTAATC	8.87667	2.2975	0.877373	2.61861	0.00882884	0.043255	hsa|mt-sRNA|Leu|H|3230|tRF-5|25|	hsa|mt-sRNA|Leu|H|3230	tRF-5	normal_1_mismatch	Mt_tRNA	H	sense	Leu	within gene boundary	3230	3254	3230	3304
GTTAAGATGGCAGAGCCCGGTAATCGCATA	118.106	1.54649	0.694917	2.22543	0.0260521	0.0975309	hsa|mt-sRNA|Leu|H|3230|tRF-5|30|	hsa|mt-sRNA|Leu|H|3230	tRF-5	normal_1_mismatch	Mt_tRNA	H	sense	Leu	within gene boundary	3230	3259	3230	3304
GTTAAGATGGCAGAGCCCGGTAATCGCATAA	19.5184	1.56596	0.711099	2.20217	0.0276531	0.099896	hsa|mt-sRNA|Leu|H|3230|tRF-5|31|	hsa|mt-sRNA|Leu|H|3230	tRF-5	normal_1_mismatch	Mt_tRNA	H	sense	Leu	within gene boundary	3230	3260	3230	3304
GTTAAGATGGCAGAGCCCGGTAATCGCATAAAACTTA	312.503	2.87287	0.715183	4.01697	5.89513e-05	0.00174627	hsa|mt-sRNA|Leu|H|3230|tRH-5|37|	hsa|mt-sRNA|Leu|H|3230	tRNA-half-5	normal_1_mismatch	Mt_tRNA	H	sense	Leu	within gene boundary	3230	3266	3230	3304
GTTAAGATTGCAGAGCCCGGTAATCGCATAAAACTTA	36.2898	3.20163	0.831797	3.84905	0.000118576	0.00287385	hsa|mt-sRNA|Leu|H|3230|tRH-5|37|8G28	hsa|mt-sRNA|Leu|H|3230	tRNA-half-5	normal_1_mismatch	Mt_tRNA	H	sense	Leu	within gene boundary	3230	3266	3230	3304	8G28
GTTAAGATTGCAGAGCCCGGTAATCGCATAAAACTTAAAACTT	14.0994	1.72072	0.754169	2.28161	0.0225121	0.088002	hsa|mt-sRNA|Leu|H|3230|tRF-5|43|8G34	hsa|mt-sRNA|Leu|H|3230	tRF-5	normal_1_mismatch	Mt_tRNA	H	sense	Leu	within gene boundary	3230	3272	3230	3304	8G34
GTTAAGATGGCAGAGCCCGGTAATCGCATAAAACTTAAAACTA	35.4077	2.24115	1.01529	2.20741	0.0272857	0.0995595	hsa|mt-sRNA|Leu|H|3230|tRF-5|43|42T0	hsa|mt-sRNA|Leu|H|3230	tRF-5	normal_1_mismatch	Mt_tRNA	H	sense	Leu	within gene boundary	3230	3272	3230	3304	42T0
GTTAAGATGGCAGAGCCCGGTAATCGCATAAAACTTAAAACTTT	25.4913	1.88828	0.679873	2.7774	0.00547959	0.0309504	hsa|mt-sRNA|Leu|H|3230|tRF-5|44|	hsa|mt-sRNA|Leu|H|3230	tRF-5	normal_1_mismatch	Mt_tRNA	H	sense	Leu	within gene boundary	3230	3273	3230	3304
GTTAAGATGGCAGAGCCCGGTAATCGCATAAAACTTAAAACTTTA	20.396	2.77565	0.883163	3.14285	0.00167311	0.0142055	hsa|mt-sRNA|Leu|H|3230|tRF-5|45|	hsa|mt-sRNA|Leu|H|3230	tRF-5	normal_1_mismatch	Mt_tRNA	H	sense	Leu	within gene boundary	3230	3274	3230	3304
GTTAAGATGGCAGAGCCCGGTAATCGCATAAAACTTAAAACTTTACAGTC	36.2367	4.72114	1.20535	3.91682	8.97246e-05	0.00230006	hsa|mt-sRNA|Leu|H|3230|tRF-5|50|	hsa|mt-sRNA|Leu|H|3230	tRF-5	normal_1_mismatch	Mt_tRNA	H	sense	Leu	within gene boundary	3230	3279	3230	3304
GTTAAGATGGCAGAGCCCGGTAATCGCATAAACCTTA	21.8086	3.99569	1.17941	3.38787	0.000704384	0.00853585	hsa|mt-sRNA|Leu|H|3230|tRH-5|37|32A4	hsa|mt-sRNA|Leu|H|3230	tRNA-half-5	normal_1_mismatch	Mt_tRNA	H	sense	Leu	within gene boundary	3230	3266	3230	3304	32A4
GTTCTTGTAGTTGAAATACAACAATGGTTTTTCATATCATTGGTCGTGGT	14.4904	6.20921	1.79501	3.45915	0.000541879	0.00737066	hsa|mt-sRNA|Glu|L|14693|tRF-5|50|27C22	hsa|mt-sRNA|Glu|L|14693	tRF-5	normal_1_mismatch	Mt_tRNA	L	sense	Glu	within gene boundary	14693	14742	14674	14742	27C22
GTTCTTGTAGTTGAAATACAACG	15.9323	-2.86002	0.820622	-3.48518	0.000491804	0.00678367	hsa|mt-sRNA|Glu|L|14720|tRF-5|23|	hsa|mt-sRNA|Glu|L|14720	tRF-5	normal_1_mismatch	Mt_tRNA	L	sense	Glu	within gene boundary	14720	14742	14674	14742
GTTCTTGTAGTTGAAATACAACGATG	12.3062	-2.21078	0.757525	-2.91843	0.00351803	0.022438	hsa|mt-sRNA|Glu|L|14717|tRF-5|26|	hsa|mt-sRNA|Glu|L|14717	tRF-5	normal_1_mismatch	Mt_tRNA	L	sense	Glu	within gene boundary	14717	14742	14674	14742
GTTCTTGTAGTTGAAATACAACGATGGTTTTTCAT	10.8328	-3.52987	1.23246	-2.86409	0.00418208	0.0255721	hsa|mt-sRNA|Glu|L|14708|tRH-5|35|	hsa|mt-sRNA|Glu|L|14708	tRNA-half-5	normal_1_mismatch	Mt_tRNA	L	sense	Glu	within gene boundary	14708	14742	14674	14742
GTTCTTGTAGTTGAAATACAACGATGGTTTTTCATATCATTGGTCGTCGT	20.1078	3.99878	1.14167	3.50257	0.000460786	0.00653433	hsa|mt-sRNA|Glu|L|14693|tRF-5|50|2C47	hsa|mt-sRNA|Glu|L|14693	tRF-5	normal_1_mismatch	Mt_tRNA	L	sense	Glu	within gene boundary	14693	14742	14674	14742	2C47
GTTCTTGTAGTTGAAATACAACGATGGTTTTTCATATCATTGGTCGTGGT	596.422	5.75592	1.28355	4.48437	7.31282e-06	0.00044309	hsa|mt-sRNA|Glu|L|14693|tRF-5|50|	hsa|mt-sRNA|Glu|L|14693	tRF-5	normal_1_mismatch	Mt_tRNA	L	sense	Glu	within gene boundary	14693	14742	14674	14742
GTTCTTGTCGTTGAAATACAACGATGGTTTTTCATATCATTGGTCGTGGT	117.269	7.92315	1.63186	4.85529	1.20213e-06	0.000124315	hsa|mt-sRNA|Glu|L|14693|tRF-5|50|41T8	hsa|mt-sRNA|Glu|L|14693	tRF-5	normal_1_mismatch	Mt_tRNA	L	sense	Glu	within gene boundary	14693	14742	14674	14742	41T8
GTTCTTGTTGTTGAAATACAAC	9.55455	-2.33726	0.989474	-2.36213	0.0181705	0.0756913	hsa|mt-sRNA|Glu|L|14721|tRF-5|22|13T8	hsa|mt-sRNA|Glu|L|14721	tRF-5	normal_1_mismatch	Mt_tRNA	L	sense	Glu	within gene boundary	14721	14742	14674	14742	13T8
GTTCTTGTTGTTGAAATACAACGATGGTTTTTCAT	44.0512	-2.35387	0.927424	-2.53807	0.0111464	0.0525024	hsa|mt-sRNA|Glu|L|14708|tRH-5|35|26T8	hsa|mt-sRNA|Glu|L|14708	tRNA-half-5	normal_1_mismatch	Mt_tRNA	L	sense	Glu	within gene boundary	14708	14742	14674	14742	26T8
GTTCTTGTTGTTGAAATACAACGATGGTTTTTCATATCATTGGTCG	20.9356	5.30018	1.81722	2.91664	0.0035382	0.0224591	hsa|mt-sRNA|Glu|L|14697|tRF-5|46|37T8	hsa|mt-sRNA|Glu|L|14697	tRF-5	normal_1_mismatch	Mt_tRNA	L	sense	Glu	within gene boundary	14697	14742	14674	14742	37T8
GTTCTTGTTGTTGAAATACAACGATGGTTTTTCATATCATTGGTCGTGGT	5768.83	6.67434	1.29537	5.15247	2.57075e-07	4.89544e-05	hsa|mt-sRNA|Glu|L|14693|tRF-5|50|41T8	hsa|mt-sRNA|Glu|L|14693	tRF-5	normal_1_mismatch	Mt_tRNA	L	sense	Glu	within gene boundary	14693	14742	14674	14742	41T8
GTTGTAGTCCGTGCGAGAATA	62.4436	5.57833	1.58585	3.51757	0.000435522	0.00631034	hsa|mt-sRNA|Glu|L|14674|tRF-3|21|	hsa|mt-sRNA|Glu|L|14674	tRF-3	normal_1_mismatch	Mt_tRNA	L	sense	Glu	within gene boundary	14674	14694	14674	14742
GTTGTATTTCAACTACAAGAACACA	22.4747	4.2241	1.62646	2.59711	0.00940119	0.0450784	hsa|mt-sRNA|Glu|H|as14721|tRF-3|25|24C0	hsa|mt-sRNA|Glu|H|as14721	tRF-3	normal_1_mismatch	Mt_tRNA	H	anti-sense	Glu	within gene boundary	14721	14745	14674	14742	24C0
GTTGTATTTCAACTACAAGAACACC	45.4843	3.08768	1.38218	2.23391	0.0254887	0.0959786	hsa|mt-sRNA|Glu|H|as14721|tRF-3|25|	hsa|mt-sRNA|Glu|H|as14721	tRF-3	normal_1_mismatch	Mt_tRNA	H	anti-sense	Glu	within gene boundary	14721	14745	14674	14742
GTTCTTGTGGTTGAAATACA	8.05847	-1.9908	0.90331	-2.2039	0.0275314	0.0997264	hsa|mt-sRNA|Glu|L|14723|tRF-5|20|11T8	hsa|mt-sRNA|Glu|L|14723	tRF-5	normal_1_mismatch	Mt_tRNA	L	sense	Glu	within gene boundary	14723	14742	14674	14742	11T8
GTTCTTGTGGTTGAAATACAACGATGGTTTTTCATATCATTGGTCGTGGT	1250.51	6.74944	1.29157	5.22578	1.73423e-07	3.85288e-05	hsa|mt-sRNA|Glu|L|14693|tRF-5|50|41T8	hsa|mt-sRNA|Glu|L|14693	tRF-5	normal_1_mismatch	Mt_tRNA	L	sense	Glu	within gene boundary	14693	14742	14674	14742	41T8
GTTCTTGTTGTTGAAA	7.98479	-2.46597	1.03961	-2.37202	0.0176914	0.0744402	hsa|mt-sRNA|Glu|L|14727|tRF-5|16|7T8	hsa|mt-sRNA|Glu|L|14727	tRF-5	normal_1_mismatch	Mt_tRNA	L	sense	Glu	within gene boundary	14727	14742	14674	14742	7T8
GTTCTTGTTGTTGAAATAC	16.714	-2.57371	0.877272	-2.93376	0.00334882	0.0216698	hsa|mt-sRNA|Glu|L|14724|tRF-5|19|10T8	hsa|mt-sRNA|Glu|L|14724	tRF-5	normal_1_mismatch	Mt_tRNA	L	sense	Glu	within gene boundary	14724	14742	14674	14742	10T8
GTTCTTGTTGTTGAAATACA	12.7638	-2.19192	0.793008	-2.76406	0.00570877	0.0317074	hsa|mt-sRNA|Glu|L|14723|tRF-5|20|11T8	hsa|mt-sRNA|Glu|L|14723	tRF-5	normal_1_mismatch	Mt_tRNA	L	sense	Glu	within gene boundary	14723	14742	14674	14742	11T8
GTTGTCTTTCAACTACAAGAACACC	15.2136	5.13001	1.67058	3.07079	0.00213495	0.0163556	hsa|mt-sRNA|Glu|H|as14721|tRF-3|25|5A19	hsa|mt-sRNA|Glu|H|as14721	tRF-3	normal_1_mismatch	Mt_tRNA	H	anti-sense	Glu	within gene boundary	14721	14745	14674	14742	5A19
GTTTATGTTGCTTACCT	9.62974	2.91564	0.98406	2.96287	0.00304784	0.0207284	hsa|mt-sRNA|Phe|H|577|tRF-5|17|8A8	hsa|mt-sRNA|Phe|H|577	tRF-5	normal_1_mismatch	Mt_tRNA	H	sense	Phe	within gene boundary	577	593	577	647	8A8
GTTTTTCATATCATTGGTCGTCGTTGTAGTCCGTGCGAGAATA	15.3522	5.231	1.76789	2.95889	0.00308753	0.0207363	hsa|mt-sRNA|Glu|L|14674|tRF-3|43|21C21	hsa|mt-sRNA|Glu|L|14674	tRF-3	normal_1_mismatch	Mt_tRNA	L	sense	Glu	within gene boundary	14674	14716	14674	14742	21C21
GTTTTTCATATCATTGGTCGTGGTTGTAGTCCGTGCGAGAATA	942.632	5.94213	1.42823	4.16048	3.17576e-05	0.00111402	hsa|mt-sRNA|Glu|L|14674|tRF-3|43|	hsa|mt-sRNA|Glu|L|14674	tRF-3	normal_1_mismatch	Mt_tRNA	L	sense	Glu	within gene boundary	14674	14716	14674	14742
TAAGCTATCGGGCCCATACCCCGAAA	16.6817	-2.35974	0.793435	-2.97408	0.00293872	0.020297	hsa|mt-sRNA|Met|H|4418|i-tRF-5|26|	hsa|mt-sRNA|Met|H|4418	i-tRF-5	normal_1_mismatch	Mt_tRNA	H	sense	Met	within gene boundary	4418	4443	4402	4469
TAAGCTATCGGGCCCATACCCCGAAAATGTTGGA	32.3765	-2.89005	0.870533	-3.31986	0.000900632	0.0101837	hsa|mt-sRNA|Met|H|4418|i-tRF-5|34|33T0	hsa|mt-sRNA|Met|H|4418	i-tRF-5	normal_1_mismatch	Mt_tRNA	H	sense	Met	within gene boundary	4418	4451	4402	4469	33T0
TACAGTCAGAGGTTCATTTCCTCTTCTTAACA	13.6592	4.75244	1.62345	2.92737	0.00341839	0.0220131	hsa|mt-sRNA|Leu|H|3273|tRF-3|32|16A15	hsa|mt-sRNA|Leu|H|3273	tRF-3	normal_1_mismatch	Mt_tRNA	H	sense	Leu	within gene boundary	3273	3304	3230	3304	16A15
TAGGATGGAGTGTGATAGGTGGCACGGAGAATTTTG	11.6419	-2.86611	1.095	-2.61746	0.00885867	0.043255	hsa|mt-sRNA|Gln|L|4365|tRF-5|36|27C8	hsa|mt-sRNA|Gln|L|4365	tRF-5	normal_1_mismatch	Mt_tRNA	L	sense	Gln	within gene boundary	4365	4400	4329	4400	27C8
TAGGATGGCGTGTGATAGGTGGCACGGAGAATTTTG	13.8949	-3.48788	1.06714	-3.26843	0.00108145	0.0110043	hsa|mt-sRNA|Gln|L|4365|tRF-5|36|27C8	hsa|mt-sRNA|Gln|L|4365	tRF-5	normal_1_mismatch	Mt_tRNA	L	sense	Gln	within gene boundary	4365	4400	4329	4400	27C8
TAGGATGGGGTGTGATAGGTGGCACGGAG	36.2389	-3.21837	1.04124	-3.09091	0.00199541	0.0157788	hsa|mt-sRNA|Gln|L|4372|tRF-5|29|	hsa|mt-sRNA|Gln|L|4372	tRF-5	normal_1_mismatch	Mt_tRNA	L	sense	Gln	within gene boundary	4372	4400	4329	4400
TAGGATGGGGTGTGATAGGTGGCACGGAGA	113.441	-3.67647	1.12102	-3.27957	0.00103966	0.0107432	hsa|mt-sRNA|Gln|L|4371|tRF-5|30|	hsa|mt-sRNA|Gln|L|4371	tRF-5	normal_1_mismatch	Mt_tRNA	L	sense	Gln	within gene boundary	4371	4400	4329	4400
TAGGATGGGGTGTGATAGGTGGCACGGAGAA	52.4159	-2.49144	1.07846	-2.31018	0.020878	0.0837222	hsa|mt-sRNA|Gln|L|4370|tRF-5|31|	hsa|mt-sRNA|Gln|L|4370	tRF-5	normal_1_mismatch	Mt_tRNA	L	sense	Gln	within gene boundary	4370	4400	4329	4400
TAGGATGGGGTGTGATAGGTGGCACGGAGAAT	101.408	-2.60545	1.12393	-2.31817	0.0204403	0.0829482	hsa|mt-sRNA|Gln|L|4369|tRF-5|32|	hsa|mt-sRNA|Gln|L|4369	tRF-5	normal_1_mismatch	Mt_tRNA	L	sense	Gln	within gene boundary	4369	4400	4329	4400
TAGGATGGGGTGTGATAGGTGGCACGGAGAATT	203.147	-2.70382	1.22367	-2.2096	0.0271331	0.0995595	hsa|mt-sRNA|Gln|L|4368|tRF-5|33|	hsa|mt-sRNA|Gln|L|4368	tRF-5	normal_1_mismatch	Mt_tRNA	L	sense	Gln	within gene boundary	4368	4400	4329	4400
TAGGATGGGGTGTGATAGGTGGCACGGAGAATTA	190.03	-3.16305	1.15528	-2.73791	0.00618303	0.0332338	hsa|mt-sRNA|Gln|L|4367|tRF-5|34|0A33	hsa|mt-sRNA|Gln|L|4367	tRF-5	normal_1_mismatch	Mt_tRNA	L	sense	Gln	within gene boundary	4367	4400	4329	4400	0A33
TAGGATGGGGTGTGATAGGTGGCACGGAGAATTT	86.1966	-2.91706	1.10036	-2.651	0.0080253	0.0403688	hsa|mt-sRNA|Gln|L|4367|tRF-5|34|	hsa|mt-sRNA|Gln|L|4367	tRF-5	normal_1_mismatch	Mt_tRNA	L	sense	Gln	within gene boundary	4367	4400	4329	4400
TAGGATGGGGTGTGATAGGTGGCACGGAGAATTTT	183.823	-2.6731	1.16306	-2.29835	0.0215421	0.0854633	hsa|mt-sRNA|Gln|L|4366|tRF-5|35|	hsa|mt-sRNA|Gln|L|4366	tRF-5	normal_1_mismatch	Mt_tRNA	L	sense	Gln	within gene boundary	4366	4400	4329	4400
TAGGATGGGGTGTGATAGGTGGCACGGAGAATTTTA	527.43	-2.7833	1.11446	-2.49745	0.0125089	0.0576967	hsa|mt-sRNA|Gln|L|4365|tRF-5|36|0C35	hsa|mt-sRNA|Gln|L|4365	tRF-5	normal_1_mismatch	Mt_tRNA	L	sense	Gln	within gene boundary	4365	4400	4329	4400	0C35
TAGGATGGGGTGTGATAGGTGGCACGGAGAATTTTG	453.313	-3.17684	1.12366	-2.82722	0.00469544	0.0279421	hsa|mt-sRNA|Gln|L|4365|tRF-5|36|	hsa|mt-sRNA|Gln|L|4365	tRF-5	normal_1_mismatch	Mt_tRNA	L	sense	Gln	within gene boundary	4365	4400	4329	4400
TAGGATGGGGTGTGATAGGTGGCACGGAGAATTTTGA	1390.52	-3.50806	1.30325	-2.69179	0.00710695	0.0367193	hsa|mt-sRNA|Gln|L|4364|tRF-5|37|0C36	hsa|mt-sRNA|Gln|L|4364	tRF-5	normal_1_mismatch	Mt_tRNA	L	sense	Gln	within gene boundary	4364	4400	4329	4400	0C36
TAGGATGGGGTGTGATAGGTGGCACGGAGAATTTTGAA	82.5559	-2.70183	1.1372	-2.37586	0.017508	0.0740894	hsa|mt-sRNA|Gln|L|4363|tRF-5|38|1C36	hsa|mt-sRNA|Gln|L|4363	tRF-5	normal_1_mismatch	Mt_tRNA	L	sense	Gln	within gene boundary	4363	4400	4329	4400	1C36
TAGGATGGTGTGTGATAGGTGGCACGGAGAATTTTG	16.9092	-2.85105	1.19014	-2.39555	0.0165952	0.0718229	hsa|mt-sRNA|Gln|L|4365|tRF-5|36|27C8	hsa|mt-sRNA|Gln|L|4365	tRF-5	normal_1_mismatch	Mt_tRNA	L	sense	Gln	within gene boundary	4365	4400	4329	4400	27C8
TAGGATGGGGTGTGATCGGTGGCACGGAGAATTTTG	16.8479	-7.88437	2.38588	-3.30459	0.000951152	0.0103925	hsa|mt-sRNA|Gln|L|4365|tRF-5|36|19T16	hsa|mt-sRNA|Gln|L|4365	tRF-5	normal_1_mismatch	Mt_tRNA	L	sense	Gln	within gene boundary	4365	4400	4329	4400	19T16
TAGGATGGGGTGTGCTAGGTGGCACGGAGAATTTTG	14.4679	-7.66446	2.37721	-3.22414	0.0012635	0.0118889	hsa|mt-sRNA|Gln|L|4365|tRF-5|36|21T14	hsa|mt-sRNA|Gln|L|4365	tRF-5	normal_1_mismatch	Mt_tRNA	L	sense	Gln	within gene boundary	4365	4400	4329	4400	21T14
TCAAAGTTAAATTATAGGCT	90.4681	-2.74456	1.14894	-2.38878	0.0169044	0.0722732	hsa|mt-sRNA|Asp|H|7549|i-tRF-5|20|	hsa|mt-sRNA|Asp|H|7549	i-tRF-5	normal_1_mismatch	Mt_tRNA	H	sense	Asp	within gene boundary	7549	7568	7518	7585
TCAAAGTTAAATTATAGGCTAAATCCTATATATA	15.8265	-2.67082	0.867469	-3.07886	0.00207793	0.016104	hsa|mt-sRNA|Asp|H|7549|tRF-3|34|33C0	hsa|mt-sRNA|Asp|H|7549	tRF-3	normal_1_mismatch	Mt_tRNA	H	sense	Asp	within gene boundary	7549	7582	7518	7585	33C0
TCACAAGAACTGCTAACTCATGCCCCCATGTCTAACAACATGGCT	19.0731	6.60602	1.85351	3.56407	0.000365151	0.00593594	hsa|mt-sRNA|Ser2|H|12215|i-tRF-5|45|	hsa|mt-sRNA|Ser2|H|12215	i-tRF-5	normal_1_mismatch	Mt_tRNA	H	sense	Ser2	within gene boundary	12215	12259	12207	12265
TCATATCATTGGTCGTGGTTGTAGTCCGTGCGCGAATA	12.1025	6.00965	1.86466	3.22292	0.00126891	0.0118889	hsa|mt-sRNA|Glu|L|14674|tRF-3|38|5T32	hsa|mt-sRNA|Glu|L|14674	tRF-3	normal_1_mismatch	Mt_tRNA	L	sense	Glu	within gene boundary	14674	14711	14674	14742	5T32
TCATTGGTCGTGGTTGTAGTCCGTGCGAGAATA	119.813	4.62452	1.7102	2.70408	0.00684939	0.035665	hsa|mt-sRNA|Glu|L|14674|tRF-3|33|	hsa|mt-sRNA|Glu|L|14674	tRF-3	normal_1_mismatch	Mt_tRNA	L	sense	Glu	within gene boundary	14674	14706	14674	14742
TGAATCTGACAACAGAGGCTTACGACC	20.1376	2.77852	0.866046	3.20828	0.00133531	0.0121915	hsa|mt-sRNA|His|H|12169|i-tRF-5|27|	hsa|mt-sRNA|His|H|12169	i-tRF-5	normal_1_mismatch	Mt_tRNA	H	sense	His	within gene boundary	12169	12195	12138	12206
TGAATCTGACAACAGAGGCTTACGACCC	49.8252	2.69329	0.928386	2.90104	0.00371925	0.0230593	hsa|mt-sRNA|His|H|12169|i-tRF-5|28|	hsa|mt-sRNA|His|H|12169	i-tRF-5	normal_1_mismatch	Mt_tRNA	H	sense	His	within gene boundary	12169	12196	12138	12206
TGAATCTGACAACAGAGGCTTACGACCCC	111.846	3.05572	0.809867	3.77311	0.000161223	0.00335798	hsa|mt-sRNA|His|H|12169|i-tRF-5|29|	hsa|mt-sRNA|His|H|12169	i-tRF-5	normal_1_mismatch	Mt_tRNA	H	sense	His	within gene boundary	12169	12197	12138	12206
TGAATCTGACAACAGAGGCTTACGACCCCTTATTTACCC	2576.52	2.80038	1.04279	2.68548	0.00724254	0.0372753	hsa|mt-sRNA|His|H|12169|tRF-3|39|38G0	hsa|mt-sRNA|His|H|12169	tRF-3	normal_1_mismatch	Mt_tRNA	H	sense	His	within gene boundary	12169	12207	12138	12206	38G0
TGAATCTGACAACAGAGGCTTACGACCCCTTCTTTACC	39.2313	6.66572	1.47295	4.52541	6.02782e-06	0.000401754	hsa|mt-sRNA|His|H|12169|tRF-3|38|31A6	hsa|mt-sRNA|His|H|12169	tRF-3	normal_1_mismatch	Mt_tRNA	H	sense	His	within gene boundary	12169	12206	12138	12206	31A6
TGAATCTGACAACAGAGGCTTACGACCCCTTTTTTACC	11.1062	6.59127	1.75738	3.75063	0.000176389	0.00361734	hsa|mt-sRNA|His|H|12169|tRF-3|38|31A6	hsa|mt-sRNA|His|H|12169	tRF-3	normal_1_mismatch	Mt_tRNA	H	sense	His	within gene boundary	12169	12206	12138	12206	31A6
TGAATCTGACAACAGAGGCTTACGACCCCT	344.282	2.74542	0.815979	3.36457	0.000766634	0.00904356	hsa|mt-sRNA|His|H|12169|i-tRF-5|30|	hsa|mt-sRNA|His|H|12169	i-tRF-5	normal_1_mismatch	Mt_tRNA	H	sense	His	within gene boundary	12169	12198	12138	12206
TGAATCTGACAACAGAGGCTTACGACCCCTT	142.07	2.18934	0.802605	2.7278	0.00637589	0.0334609	hsa|mt-sRNA|His|H|12169|i-tRF-5|31|	hsa|mt-sRNA|His|H|12169	i-tRF-5	normal_1_mismatch	Mt_tRNA	H	sense	His	within gene boundary	12169	12199	12138	12206
TGAATCTGACAACAGAGGCTTACGACCCCTTATTTACC	1626.63	2.70874	1.03475	2.61777	0.00885068	0.043255	hsa|mt-sRNA|His|H|12169|tRF-3|38|	hsa|mt-sRNA|His|H|12169	tRF-3	normal_1_mismatch	Mt_tRNA	H	sense	His	within gene boundary	12169	12206	12138	12206
TGGTTTTTCATATCATTGGTCGTGGTTGTAGTCCGTGCGAGAATA	17.8238	6.08514	2.00437	3.03594	0.00239788	0.0180345	hsa|mt-sRNA|Glu|L|14674|tRF-3|45|	hsa|mt-sRNA|Glu|L|14674	tRF-3	normal_1_mismatch	Mt_tRNA	L	sense	Glu	within gene boundary	14674	14718	14674	14742
TGGTCGTGGTTGTAGTCCGTGCGAGAATA	370.71	5.32764	1.56182	3.41117	0.000646844	0.00807691	hsa|mt-sRNA|Glu|L|14674|tRF-3|29|	hsa|mt-sRNA|Glu|L|14674	tRF-3	normal_1_mismatch	Mt_tRNA	L	sense	Glu	within gene boundary	14674	14702	14674	14742
TGTAGTCCGTGCGAGAATA	47.8328	5.17886	1.6004	3.23598	0.00121226	0.011775	hsa|mt-sRNA|Glu|L|14674|tRF-3|19|	hsa|mt-sRNA|Glu|L|14674	tRF-3	normal_1_mismatch	Mt_tRNA	L	sense	Glu	within gene boundary	14674	14692	14674	14742
TGTTTGTGGGTTTAAGTCCCATTGGTCTAGC	43.6313	4.23643	1.51018	2.80525	0.00502768	0.0290149	hsa|mt-sRNA|Asn|L|5656|tRF-3|31|0A30	hsa|mt-sRNA|Asn|L|5656	tRF-3	normal_1_mismatch	Mt_tRNA	L	sense	Asn	overlap gene boundary	5656	5686	5657	5729	0A30
TTAACTAAGTGTTTGTGGGTTTAAGTCCCATTGGTCA	15.8362	-3.41564	1.00427	-3.40113	0.000671078	0.00820685	hsa|mt-sRNA|Asn|L|5659|tRH-3|37|0A36	hsa|mt-sRNA|Asn|L|5659	tRNA-half-3	normal_1_mismatch	Mt_tRNA	L	sense	Asn	within gene boundary	5659	5695	5657	5729	0A36
TTAACTAAGTGTTTGTGGGTTTAAGTCCCATTGGTCTA	42.8595	-1.92039	0.785792	-2.4439	0.0145296	0.0649932	hsa|mt-sRNA|Asn|L|5658|tRF-3|38|	hsa|mt-sRNA|Asn|L|5658	tRF-3	normal_1_mismatch	Mt_tRNA	L	sense	Asn	within gene boundary	5658	5695	5657	5729
TTAGACGGGCTCACATCACCCCATAAA	19.8615	5.10665	1.44489	3.53429	0.000408878	0.00625929	hsa|mt-sRNA|Phe|H|619|tRF-3|27|	hsa|mt-sRNA|Phe|H|619	tRF-3	normal_1_mismatch	Mt_tRNA	H	sense	Phe	within gene boundary	619	645	577	647
TTAGACGGGCTCACATCACCCCATAAAC	8.96866	4.03615	1.44731	2.78872	0.00529162	0.0301441	hsa|mt-sRNA|Phe|H|619|tRF-3|28|	hsa|mt-sRNA|Phe|H|619	tRF-3	normal_1_mismatch	Mt_tRNA	H	sense	Phe	within gene boundary	619	646	577	647
TTAGACGGGCTCACATCACCCCATAAACAC	18.3538	5.45985	1.84512	2.95908	0.00308557	0.0207363	hsa|mt-sRNA|Phe|H|619|tRF-3|30|29A0	hsa|mt-sRNA|Phe|H|619	tRF-3	normal_1_mismatch	Mt_tRNA	H	sense	Phe	within gene boundary	619	648	577	647	29A0
TTGTAGTCCGTGCGAGAATA	19.538	3.80864	1.62708	2.34079	0.0192431	0.0791699	hsa|mt-sRNA|Glu|L|14674|tRF-3|20|	hsa|mt-sRNA|Glu|L|14674	tRF-3	normal_1_mismatch	Mt_tRNA	L	sense	Glu	within gene boundary	14674	14693	14674	14742
TTGTGAATCTGACAACA	10.2997	2.65036	1.1727	2.26004	0.0238187	0.0920299	hsa|mt-sRNA|His|H|12166|i-tRF-5|17|	hsa|mt-sRNA|His|H|12166	i-tRF-5	normal_1_mismatch	Mt_tRNA	H	sense	His	within gene boundary	12166	12182	12138	12206
TTTAAGTTAAAGATTAAGAGAACCAACACCTCTTTACAGTGAC	11.8235	3.80252	1.34828	2.82028	0.00479821	0.0281936	hsa|mt-sRNA|Lys|H|8323|tRF-3|43|42A0	hsa|mt-sRNA|Lys|H|8323	tRF-3	normal_1_mismatch	Mt_tRNA	H	sense	Lys	within gene boundary	8323	8365	8295	8364	42A0
TTTAGACGGGCTCACATCACCCCATAAA	7.01427	3.40097	1.37261	2.47774	0.0132217	0.060152	hsa|mt-sRNA|Phe|H|618|tRF-3|28|	hsa|mt-sRNA|Phe|H|618	tRF-3	normal_1_mismatch	Mt_tRNA	H	sense	Phe	within gene boundary	618	645	577	647
TTTTCCTATCATTGGTCGTGGTTGTAGTCCGTGCGAGAATA	10.8327	6.55518	2.16844	3.023	0.00250282	0.0185348	hsa|mt-sRNA|Glu|L|14674|tRF-3|41|35T5	hsa|mt-sRNA|Glu|L|14674	tRF-3	normal_1_mismatch	Mt_tRNA	L	sense	Glu	within gene boundary	14674	14714	14674	14742	35T5
TTTTTCATATCATTGGTCGTGGTTGTAGTCCGTGCGAGAATA	150.352	5.80748	1.47934	3.92573	8.64666e-05	0.00226	hsa|mt-sRNA|Glu|L|14674|tRF-3|42|	hsa|mt-sRNA|Glu|L|14674	tRF-3	normal_1_mismatch	Mt_tRNA	L	sense	Glu	within gene boundary	14674	14715	14674	14742
AAAAATTTCGGTTGGGC	20.1711	-3.10323	1.24466	-2.49322	0.0126589	0.0580227	hsa|mt-sRNA|mtLSU rRNA|H|2801|i-3p|17|16G0	hsa|mt-sRNA|mtLSU rRNA|H|2801	i-3prime	normal_1_mismatch	Mt_rRNA	H	sense	mtLSU rRNA	within gene boundary	2801	2817	1671	3229	16G0
AAACCATTTACCCAAATAAAGTATAGGCGATAGAAATTGAAACCT	25.5209	2.40256	0.83967	2.86132	0.0042188	0.0256788	hsa|mt-sRNA|mtLSU rRNA|H|1722|i-5p|45|	hsa|mt-sRNA|mtLSU rRNA|H|1722	i-5prime	normal_1_mismatch	Mt_rRNA	H	sense	mtLSU rRNA	within gene boundary	1722	1766	1671	3229
AAACATATAACTGAACTCCTCACACCCAATTGGACC	20.7844	3.24746	1.34267	2.41865	0.0155782	0.0690386	hsa|mt-sRNA|mtLSU rRNA|H|2237|i-5p|36|	hsa|mt-sRNA|mtLSU rRNA|H|2237	i-5prime	normal_1_mismatch	Mt_rRNA	H	sense	mtLSU rRNA	within gene boundary	2237	2272	1671	3229
AAAGGTTCGTTTGTC	15.1729	-3.43347	1.23068	-2.78991	0.00527233	0.0301441	hsa|mt-sRNA|mtLSU rRNA|H|3028|i-3p|15|14T0	hsa|mt-sRNA|mtLSU rRNA|H|3028	i-3prime	normal_1_mismatch	Mt_rRNA	H	sense	mtLSU rRNA	within gene boundary	3028	3042	1671	3229	14T0
AAGAACAGGGTTTGTTA	70.1587	2.35158	0.834929	2.8165	0.00485497	0.0283845	hsa|mt-sRNA|mtLSU rRNA|H|3217|i-3p|17|	hsa|mt-sRNA|mtLSU rRNA|H|3217	i-3prime	normal_1_mismatch	Mt_rRNA	H	sense	mtLSU rRNA	within gene boundary	3217	3233	1671	3229
AACTTCGGCTCACTCCTTGGCGCCTGCCTA	22.6077	-2.53478	0.915096	-2.76996	0.00560632	0.0314001	hsa|mt-sRNA|CytB|H|14840|i-5p|30|29G0	hsa|mt-sRNA|CytB|H|14840	i-5prime	normal_1_mismatch	protein_coding	H	sense	CytB	within gene boundary	14840	14869	14747	15887	29G0
AAGGACATTTAACTAAAACCCCT	8.6494	-3.06371	1.2502	-2.45058	0.0142627	0.0642302	hsa|mt-sRNA|mtSSU rRNA|H|1513|i-3p|23|	hsa|mt-sRNA|mtSSU rRNA|H|1513	i-3prime	normal_1_mismatch	Mt_rRNA	H	sense	mtSSU rRNA	within gene boundary	1513	1535	648	1601
ACTGGAAAGTGCACTTGGACGAACA	13.3993	1.93886	0.837005	2.31643	0.0205348	0.0829482	hsa|mt-sRNA|mtSSU rRNA|H|1578|3p|25|24C0	hsa|mt-sRNA|mtSSU rRNA|H|1578	3prime	normal_1_mismatch	Mt_rRNA	H	sense	mtSSU rRNA	within gene boundary	1578	1602	648	1601	24C0
AGAGGAGCCTGTTCTGT	12.1026	3.94114	1.78439	2.20868	0.0271969	0.0995595	hsa|mt-sRNA|mtSSU rRNA|H|1196|i-3p|17|	hsa|mt-sRNA|mtSSU rRNA|H|1196	i-3prime	normal_1_mismatch	Mt_rRNA	H	sense	mtSSU rRNA	within gene boundary	1196	1212	648	1601
ATAGGCGATCGAAATTGAAACCT	27.063	-5.5119	2.01854	-2.73063	0.00632133	0.0333174	hsa|mt-sRNA|mtLSU rRNA|H|1744|i-5p|23|9A13	hsa|mt-sRNA|mtLSU rRNA|H|1744	i-5prime	normal_1_mismatch	Mt_rRNA	H	sense	mtLSU rRNA	within gene boundary	1744	1766	1671	3229	9A13
ATATCATCTCAACTTAGTATTATACCCACACCCACCCAAGAACAGGGTTT	23.1063	4.01654	1.08341	3.70732	0.000209464	0.0039888	hsa|mt-sRNA|mtLSU rRNA|H|3180|3p|50|	hsa|mt-sRNA|mtLSU rRNA|H|3180	3prime	normal_1_mismatch	Mt_rRNA	H	sense	mtLSU rRNA	within gene boundary	3180	3229	1671	3229
ATGGCACATGCAGCGCAAGTAGGTCTACAAGACGCTACTTCCCCT	9.49916	2.39562	1.06751	2.24411	0.0248256	0.0948208	hsa|mt-sRNA|tRNA-Asp|H|7586|tRF-1|45|	hsa|mt-sRNA|tRNA-Asp|H|7586	tRF-1	normal_1_mismatch	protein_coding	H	sense	tRNA-Asp	within gene boundary	7586	7630	7586	8269
ATTAATCCCCTGGCCCAACCC	12.9745	-2.15515	0.929943	-2.31751	0.0204759	0.0829482	hsa|mt-sRNA|tRNA-Met|H|4470|tRF-1|21|	hsa|mt-sRNA|tRNA-Met|H|4470	tRF-1	normal_1_mismatch	protein_coding	H	sense	tRNA-Met	within gene boundary	4470	4490	4470	5511
ATTATACCCACACCCACCCAAGAACAGGGTTTGTTA	17.3451	3.41127	1.20238	2.83709	0.00455268	0.027214	hsa|mt-sRNA|mtLSU rRNA|H|3198|i-3p|36|	hsa|mt-sRNA|mtLSU rRNA|H|3198	i-3prime	normal_1_mismatch	Mt_rRNA	H	sense	mtLSU rRNA	within gene boundary	3198	3233	1671	3229
ATTTACCCAAATAAAGTATAGGCGATAGAAATTGAAACCT	76.729	2.42442	0.805284	3.01064	0.002607	0.0191853	hsa|mt-sRNA|mtLSU rRNA|H|1727|i-5p|40|	hsa|mt-sRNA|mtLSU rRNA|H|1727	i-5prime	normal_1_mismatch	Mt_rRNA	H	sense	mtLSU rRNA	within gene boundary	1727	1766	1671	3229
ATTTACCCAAATAAAGTATAGGCGATAGAAATTGAAACCTGGCGCA	9.72479	3.36745	1.50165	2.2425	0.0249293	0.0949449	hsa|mt-sRNA|mtLSU rRNA|H|1727|i-5p|46|	hsa|mt-sRNA|mtLSU rRNA|H|1727	i-5prime	normal_1_mismatch	Mt_rRNA	H	sense	mtLSU rRNA	within gene boundary	1727	1772	1671	3229
CAAATAAAGTATAGGCGATAGAAATTGAAACCT	60.5342	2.02433	0.916595	2.20853	0.0272075	0.0995595	hsa|mt-sRNA|mtLSU rRNA|H|1734|i-5p|33|	hsa|mt-sRNA|mtLSU rRNA|H|1734	i-5prime	normal_1_mismatch	Mt_rRNA	H	sense	mtLSU rRNA	within gene boundary	1734	1766	1671	3229
CAAGAACAGGGTTTGTTA	58.9852	2.4724	0.852128	2.90145	0.00371443	0.0230593	hsa|mt-sRNA|mtLSU rRNA|H|3216|i-3p|18|	hsa|mt-sRNA|mtLSU rRNA|H|3216	i-3prime	normal_1_mismatch	Mt_rRNA	H	sense	mtLSU rRNA	within gene boundary	3216	3233	1671	3229
CATTAGGAGGGCTGAGAGGGCCCCT	24.3643	3.54421	1.54518	2.29373	0.0218062	0.085999	hsa|mt-sRNA|COIII|L|as9263|i-3p|25|	hsa|mt-sRNA|COIII|L|as9263	i-3prime	normal_1_mismatch	protein_coding	L	anti-sense	COIII	within gene boundary	9263	9287	9207	9990
CATTAGGAGGGCTGAGAGGGCCCCTA	45.0401	3.36424	1.22537	2.74547	0.00604234	0.0331231	hsa|mt-sRNA|COIII|L|as9262|i-3p|26|0C25	hsa|mt-sRNA|COIII|L|as9262	i-3prime	normal_1_mismatch	protein_coding	L	anti-sense	COIII	within gene boundary	9262	9287	9207	9990	0C25
CCAAACCTGCATTAAAAATTTCGGTTGGGAC	195.486	-1.48358	0.573437	-2.58716	0.00967696	0.0462344	hsa|mt-sRNA|mtLSU rRNA|H|2788|i-3p|31|29G1	hsa|mt-sRNA|mtLSU rRNA|H|2788	i-3prime	normal_1_mismatch	Mt_rRNA	H	sense	mtLSU rRNA	within gene boundary	2788	2818	1671	3229	29G1
CCAAGAACAGGGTTTGTTA	16.9442	2.6517	0.902586	2.93789	0.0033045	0.0215927	hsa|mt-sRNA|mtLSU rRNA|H|3215|i-3p|19|	hsa|mt-sRNA|mtLSU rRNA|H|3215	i-3prime	normal_1_mismatch	Mt_rRNA	H	sense	mtLSU rRNA	within gene boundary	3215	3233	1671	3229
CCCAAGAACAGGGTTTGTTA	16.1847	3.16261	1.0697	2.95653	0.00311123	0.0207363	hsa|mt-sRNA|mtLSU rRNA|H|3214|i-3p|20|	hsa|mt-sRNA|mtLSU rRNA|H|3214	i-3prime	normal_1_mismatch	Mt_rRNA	H	sense	mtLSU rRNA	within gene boundary	3214	3233	1671	3229
CGAAACCAGACGAGCTACCTAAGAACAGCTAA	13.8618	2.85835	1.14196	2.50301	0.0123141	0.0571941	hsa|mt-sRNA|mtLSU rRNA|H|1905|i-5p|32|	hsa|mt-sRNA|mtLSU rRNA|H|1905	i-5prime	normal_1_mismatch	Mt_rRNA	H	sense	mtLSU rRNA	within gene boundary	1905	1936	1671	3229
CTGCGTCAGATTAAAACA	9.99527	3.32036	1.16328	2.8543	0.00431315	0.0259347	hsa|mt-sRNA|mtLSU rRNA|H|2341|i-5p|18|	hsa|mt-sRNA|mtLSU rRNA|H|2341	i-5prime	normal_1_mismatch	Mt_rRNA	H	sense	mtLSU rRNA	within gene boundary	2341	2358	1671	3229
CTGCGTCAGATTAAAACACT	23.67	2.24607	0.983662	2.28338	0.0224082	0.0878532	hsa|mt-sRNA|mtLSU rRNA|H|2341|i-5p|20|	hsa|mt-sRNA|mtLSU rRNA|H|2341	i-5prime	normal_1_mismatch	Mt_rRNA	H	sense	mtLSU rRNA	within gene boundary	2341	2360	1671	3229
CTTCACCAGTCAAAGCGAACT	16.1088	2.6901	0.899455	2.99082	0.00278232	0.0198428	hsa|mt-sRNA|mtLSU rRNA|H|2862|i-3p|21|	hsa|mt-sRNA|mtLSU rRNA|H|2862	i-3prime	normal_1_mismatch	Mt_rRNA	H	sense	mtLSU rRNA	within gene boundary	2862	2882	1671	3229
CTTCACCAGTCAAAGCGAACTA	13.4171	2.35623	0.976681	2.41249	0.0158441	0.0694743	hsa|mt-sRNA|mtLSU rRNA|H|2862|i-3p|22|	hsa|mt-sRNA|mtLSU rRNA|H|2862	i-3prime	normal_1_mismatch	Mt_rRNA	H	sense	mtLSU rRNA	within gene boundary	2862	2883	1671	3229
CTTCACCAGTCAAAGCGAACTACT	30.82	2.02137	0.916463	2.20562	0.0274106	0.0995595	hsa|mt-sRNA|mtLSU rRNA|H|2862|i-3p|24|	hsa|mt-sRNA|mtLSU rRNA|H|2862	i-3prime	normal_1_mismatch	Mt_rRNA	H	sense	mtLSU rRNA	within gene boundary	2862	2885	1671	3229
CTTAGTTGAACAGGGCCCT	24.7698	4.96599	1.58352	3.13604	0.00171248	0.0143138	hsa|mt-sRNA|mtSSU rRNA|H|1450|i-3p|19|	hsa|mt-sRNA|mtSSU rRNA|H|1450	i-3prime	normal_1_mismatch	Mt_rRNA	H	sense	mtSSU rRNA	within gene boundary	1450	1468	648	1601
CTTAGTTGAACAGGGCCCTGAA	12.1004	3.47302	1.46979	2.36294	0.0181304	0.0756913	hsa|mt-sRNA|mtSSU rRNA|H|1450|i-3p|22|	hsa|mt-sRNA|mtSSU rRNA|H|1450	i-3prime	normal_1_mismatch	Mt_rRNA	H	sense	mtSSU rRNA	within gene boundary	1450	1471	648	1601
GCACTTGGACGAACA	101.467	3.44659	0.746521	4.61687	3.89575e-06	0.000288502	hsa|mt-sRNA|mtSSU rRNA|H|1588|3p|15|14C0	hsa|mt-sRNA|mtSSU rRNA|H|1588	3prime	normal_1_mismatch	Mt_rRNA	H	sense	mtSSU rRNA	within gene boundary	1588	1602	648	1601	14C0
GCCAAACCATTTACCCAAATAAAGTATAGGCGATAGAAATTGAAACCTTG	27.536	3.24596	1.41893	2.28762	0.0221599	0.0871361	hsa|mt-sRNA|mtLSU rRNA|H|1719|i-5p|50|48G1	hsa|mt-sRNA|mtLSU rRNA|H|1719	i-5prime	normal_1_mismatch	Mt_rRNA	H	sense	mtLSU rRNA	within gene boundary	1719	1768	1671	3229	48G1
GCTAAACCTAGCCCCAAACC	77.2049	3.0292	1.10897	2.73155	0.00630367	0.0333174	hsa|mt-sRNA|tRNA-Val|H|1671|tRF-1|20|	hsa|mt-sRNA|tRNA-Val|H|1671	tRF-1	normal_1_mismatch	Mt_rRNA	H	sense	tRNA-Val	within gene boundary	1671	1690	1671	3229
GCTAAACCTAGCCCCAAACCCACTCCACCT	26.0487	2.19986	0.880596	2.49815	0.0124844	0.0576967	hsa|mt-sRNA|tRNA-Val|H|1671|tRF-1|30|	hsa|mt-sRNA|tRNA-Val|H|1671	tRF-1	normal_1_mismatch	Mt_rRNA	H	sense	tRNA-Val	within gene boundary	1671	1700	1671	3229
GCTAAACCTAGCCCCAAACCCACTCCACCTTACTACC	90.0912	2.11711	0.770096	2.74915	0.005975	0.0329119	hsa|mt-sRNA|tRNA-Val|H|1671|tRF-1|37|	hsa|mt-sRNA|tRNA-Val|H|1671	tRF-1	normal_1_mismatch	Mt_rRNA	H	sense	tRNA-Val	within gene boundary	1671	1707	1671	3229
GCTAAACCTAGCCCCAAACCCACTCCACCTTACTACCAGA	49.5312	3.226	0.903076	3.57223	0.000353949	0.00592417	hsa|mt-sRNA|tRNA-Val|H|1671|tRF-1|40|	hsa|mt-sRNA|tRNA-Val|H|1671	tRF-1	normal_1_mismatch	Mt_rRNA	H	sense	tRNA-Val	within gene boundary	1671	1710	1671	3229
GCTAAACCTAGCCCCAAACCCACTCCACCTTACTACCAGAA	28.8052	3.31849	0.937775	3.53869	0.000402119	0.00623284	hsa|mt-sRNA|tRNA-Val|H|1671|tRF-1|41|40C0	hsa|mt-sRNA|tRNA-Val|H|1671	tRF-1	normal_1_mismatch	Mt_rRNA	H	sense	tRNA-Val	within gene boundary	1671	1711	1671	3229	40C0
GCTAAACCTAGCCCCAAACCCACTCCACCTTACTACCAGAC	16.7833	2.95799	0.923054	3.20457	0.00135265	0.0122658	hsa|mt-sRNA|tRNA-Val|H|1671|tRF-1|41|	hsa|mt-sRNA|tRNA-Val|H|1671	tRF-1	normal_1_mismatch	Mt_rRNA	H	sense	tRNA-Val	within gene boundary	1671	1711	1671	3229
GCTAAACCTAGCCCCAAACCCACTCCACCTTCCTACCAGACAACC	13.0832	6.82636	1.47606	4.62473	3.75093e-06	0.000288502	hsa|mt-sRNA|tRNA-Val|H|1671|tRF-1|45|31A13	hsa|mt-sRNA|tRNA-Val|H|1671	tRF-1	normal_1_mismatch	Mt_rRNA	H	sense	tRNA-Val	within gene boundary	1671	1715	1671	3229	31A13
GCTAAACCTCGCCCCAAACCCACTCCACCTTACTACCA	10.6349	-6.48917	2.16611	-2.99577	0.00273754	0.0197251	hsa|mt-sRNA|tRNA-Val|H|1671|tRF-1|38|9A28	hsa|mt-sRNA|tRNA-Val|H|1671	tRF-1	normal_1_mismatch	Mt_rRNA	H	sense	tRNA-Val	within gene boundary	1671	1708	1671	3229	9A28
GCTAAACCTCGCCCCAAACCCACTCCACCTTACTACCAGACAACC	11.4307	-7.32574	2.35291	-3.11349	0.00184891	0.014937	hsa|mt-sRNA|tRNA-Val|H|1671|tRF-1|45|9A35	hsa|mt-sRNA|tRNA-Val|H|1671	tRF-1	normal_1_mismatch	Mt_rRNA	H	sense	tRNA-Val	within gene boundary	1671	1715	1671	3229	9A35
GCTAACCCTAGCCCCAAACC	19.0429	3.99626	1.27469	3.13508	0.00171809	0.0143138	hsa|mt-sRNA|tRNA-Val|H|1671|tRF-1|20|5A14	hsa|mt-sRNA|tRNA-Val|H|1671	tRF-1	normal_1_mismatch	Mt_rRNA	H	sense	tRNA-Val	within gene boundary	1671	1690	1671	3229	5A14
GCTAAACCTAGCCCCAAACCCACTCCACCTTACTACCAGACA	29.3111	3.5648	0.875977	4.06951	4.71125e-05	0.00149526	hsa|mt-sRNA|tRNA-Val|H|1671|tRF-1|42|	hsa|mt-sRNA|tRNA-Val|H|1671	tRF-1	normal_1_mismatch	Mt_rRNA	H	sense	tRNA-Val	within gene boundary	1671	1712	1671	3229
GCTAAACCTAGCCCCAAACCCACTCCACCTTACTACCAGACAA	127.055	2.66031	0.91775	2.89873	0.00374681	0.0231227	hsa|mt-sRNA|tRNA-Val|H|1671|tRF-1|43|	hsa|mt-sRNA|tRNA-Val|H|1671	tRF-1	normal_1_mismatch	Mt_rRNA	H	sense	tRNA-Val	within gene boundary	1671	1713	1671	3229
GCTAAACCTAGCCCCAAACCCACTCCACCTTACTACCAGACAAC	185.438	1.81082	0.814067	2.22442	0.0261204	0.0975309	hsa|mt-sRNA|tRNA-Val|H|1671|tRF-1|44|	hsa|mt-sRNA|tRNA-Val|H|1671	tRF-1	normal_1_mismatch	Mt_rRNA	H	sense	tRNA-Val	within gene boundary	1671	1714	1671	3229
GCTAACCCTAGCCCCAAACCCACTCCACCTTACTACC	36.8307	3.42132	1.25672	2.72242	0.00648054	0.0338767	hsa|mt-sRNA|tRNA-Val|H|1671|tRF-1|37|5A31	hsa|mt-sRNA|tRNA-Val|H|1671	tRF-1	normal_1_mismatch	Mt_rRNA	H	sense	tRNA-Val	within gene boundary	1671	1707	1671	3229	5A31
GCTAACCCTAGCCCCAAACCCACTCCACCTTACTACCA	85.2766	3.19119	1.42135	2.24518	0.0247563	0.0948208	hsa|mt-sRNA|tRNA-Val|H|1671|tRF-1|38|5A32	hsa|mt-sRNA|tRNA-Val|H|1671	tRF-1	normal_1_mismatch	Mt_rRNA	H	sense	tRNA-Val	within gene boundary	1671	1708	1671	3229	5A32
GCTAACCCTAGCCCCAAACCCACTCCACCTTACTACCAGA	14.8866	4.09524	1.21467	3.37148	0.000747643	0.00889829	hsa|mt-sRNA|tRNA-Val|H|1671|tRF-1|40|5A34	hsa|mt-sRNA|tRNA-Val|H|1671	tRF-1	normal_1_mismatch	Mt_rRNA	H	sense	tRNA-Val	within gene boundary	1671	1710	1671	3229	5A34
GCTAACCCTAGCCCCAAACCCACTCCACCTTACTACCAGACAA	36.5659	6.46386	1.28695	5.02261	5.09737e-07	8.49349e-05	hsa|mt-sRNA|tRNA-Val|H|1671|tRF-1|43|5A37	hsa|mt-sRNA|tRNA-Val|H|1671	tRF-1	normal_1_mismatch	Mt_rRNA	H	sense	tRNA-Val	within gene boundary	1671	1713	1671	3229	5A37
GCTAACCCTAGCCCCAAACCCACTCCACCTTACTACCAGACAAC	51.4274	3.08235	1.32412	2.32785	0.0199202	0.0812036	hsa|mt-sRNA|tRNA-Val|H|1671|tRF-1|44|5A38	hsa|mt-sRNA|tRNA-Val|H|1671	tRF-1	normal_1_mismatch	Mt_rRNA	H	sense	tRNA-Val	within gene boundary	1671	1714	1671	3229	5A38
GCTAACCCTAGCCCCAAACCCACTCCACCTTACTACCAGACAACCT	26.3697	3.71375	1.23551	3.00585	0.0026484	0.0192913	hsa|mt-sRNA|tRNA-Val|H|1671|tRF-1|46|5A40	hsa|mt-sRNA|tRNA-Val|H|1671	tRF-1	normal_1_mismatch	Mt_rRNA	H	sense	tRNA-Val	within gene boundary	1671	1716	1671	3229	5A40
GCTTAGTTGAACAGGGCCCTGAAGCGCGTACACACCGCCCGTCACCC	19.5592	3.61751	1.12433	3.21747	0.00129324	0.0118889	hsa|mt-sRNA|mtSSU rRNA|H|1449|i-3p|47|	hsa|mt-sRNA|mtSSU rRNA|H|1449	i-3prime	normal_1_mismatch	Mt_rRNA	H	sense	mtSSU rRNA	within gene boundary	1449	1495	648	1601
GGTAAGTGTACTGGAAAGTGCACTTGGACG	37.669	2.18069	0.964114	2.26186	0.0237058	0.0918601	hsa|mt-sRNA|mtSSU rRNA|H|1569|3p|30|	hsa|mt-sRNA|mtSSU rRNA|H|1569	3prime	normal_1_mismatch	Mt_rRNA	H	sense	mtSSU rRNA	within gene boundary	1569	1598	648	1601
GTAAGTGTACTGGAAAGTGCACTTGGACGAACA	20.8756	3.04312	0.965594	3.15156	0.00162403	0.0140461	hsa|mt-sRNA|mtSSU rRNA|H|1570|3p|33|32C0	hsa|mt-sRNA|mtSSU rRNA|H|1570	3prime	normal_1_mismatch	Mt_rRNA	H	sense	mtSSU rRNA	within gene boundary	1570	1602	648	1601	32C0
TAGGAGGGCTGAGAGGGCCCC	20.5598	3.23167	1.35878	2.37837	0.0173895	0.0738223	hsa|mt-sRNA|COIII|L|as9264|i-3p|21|	hsa|mt-sRNA|COIII|L|as9264	i-3prime	normal_1_mismatch	protein_coding	L	anti-sense	COIII	within gene boundary	9264	9284	9207	9990
TATAACTGAACTCCTCACACCCAATTGGACC	53.5003	3.1598	1.36884	2.30839	0.0209776	0.0837222	hsa|mt-sRNA|mtLSU rRNA|H|2242|i-5p|31|	hsa|mt-sRNA|mtLSU rRNA|H|2242	i-5prime	normal_1_mismatch	Mt_rRNA	H	sense	mtLSU rRNA	within gene boundary	2242	2272	1671	3229
TATAACTGAACTCCTCACACCCAATTGGACCAATCTATCACC	11.1222	3.65329	1.52644	2.39334	0.0166957	0.072024	hsa|mt-sRNA|mtLSU rRNA|H|2242|i-5p|42|	hsa|mt-sRNA|mtLSU rRNA|H|2242	i-5prime	normal_1_mismatch	Mt_rRNA	H	sense	mtLSU rRNA	within gene boundary	2242	2283	1671	3229
TTATACCCACACCCACCCAAGAACAGGGTTTGTTA	11.0336	2.76075	0.981125	2.81386	0.00489502	0.0284937	hsa|mt-sRNA|mtLSU rRNA|H|3199|i-3p|35|	hsa|mt-sRNA|mtLSU rRNA|H|3199	i-3prime	normal_1_mismatch	Mt_rRNA	H	sense	mtLSU rRNA	within gene boundary	3199	3233	1671	3229
TTAGTTGAACAGGGCC	11.293	4.7781	1.83015	2.61076	0.00903408	0.0437907	hsa|mt-sRNA|mtSSU rRNA|H|1451|i-3p|16|	hsa|mt-sRNA|mtSSU rRNA|H|1451	i-3prime	normal_1_mismatch	Mt_rRNA	H	sense	mtSSU rRNA	within gene boundary	1451	1466	648	1601
TTTACCCAAATAAAGTATAGGCGATAGAAATTGAAACCT	33.318	1.47988	0.668555	2.21355	0.0268597	0.0995595	hsa|mt-sRNA|mtLSU rRNA|H|1728|i-5p|39|	hsa|mt-sRNA|mtLSU rRNA|H|1728	i-5prime	normal_1_mismatch	Mt_rRNA	H	sense	mtLSU rRNA	within gene boundary	1728	1766	1671	3229
AAAAGACACCCCCCACA	19.3161	-2.81065	0.952714	-2.95015	0.00317622	0.0209599	hsa|mt-sRNA|non-coding|H|560|nc|17|0C16	hsa|mt-sRNA|non-coding|H|560	non-coding	normal_1_mismatch	non-coding	H	sense	non-coding	falls in non-coding region	560	576	na	na	0C16
AAAGACACCCCCCACA	21.0704	-2.94327	0.946949	-3.10816	0.00188258	0.0151173	hsa|mt-sRNA|non-coding|H|561|nc|16|	hsa|mt-sRNA|non-coding|H|561	non-coding	normal_1_mismatch	non-coding	H	sense	non-coding	falls in non-coding region	561	576	na	na
CAGAGAATAGTTTAAATTAGAATC	114.196	-2.40601	0.804507	-2.99067	0.00278365	0.0198428	hsa|mt-sRNA|non-coding|L|as16000|nc|24|	hsa|mt-sRNA|non-coding|L|as16000	non-coding	normal_1_mismatch	non-coding	L	anti-sense	non-coding	falls in non-coding region	16000	16023	na	na
CTCCCGCCTTTTTTCCCGGC	12.3225	-2.36516	1.0123	-2.33643	0.0194689	0.0798524	hsa|mt-sRNA|non-coding|L|as5741|nc|20|	hsa|mt-sRNA|non-coding|L|as5741	non-coding	normal_1_mismatch	non-coding	L	anti-sense	non-coding	falls in non-coding region	5741	5760	na	na
AACTTAACTTGACCGCTCTGACCA	300.89	-3.21145	0.964245	-3.33054	0.000866792	0.00996063	hsa|mt-sRNA|Val|H|1650|tRF-5|24|CCA	hsa|mt-sRNA|Val|H|1650-CCA	tRF-5	CCA_0_mismatch	Mt_tRNA	H	sense	Val	within gene boundary	1650	1670	1602	1670	CCA
AACTTGACCGCTCTGACCA	475.235	-3.58105	0.737812	-4.8536	1.21237e-06	0.000124315	hsa|mt-sRNA|Val|H|1655|tRF-5|19|CCA	hsa|mt-sRNA|Val|H|1655-CCA	tRF-5	CCA_0_mismatch	Mt_tRNA	H	sense	Val	within gene boundary	1655	1670	1602	1670	CCA
AATACTTAATTTCTGCCA	18.715	-2.33767	0.776844	-3.00919	0.00261945	0.0191853	hsa|mt-sRNA|Trp|H|5565|tRF-5|18|CCA	hsa|mt-sRNA|Trp|H|5565-CCA	tRF-5	CCA_0_mismatch	Mt_tRNA	H	sense	Trp	within gene boundary	5565	5579	5512	5579	CCA
ACATCACCCCATAAACACCA	14.6247	-2.83762	1.12648	-2.51901	0.0117685	0.0552374	hsa|mt-sRNA|Phe|H|631|tRF-5|20|CCA	hsa|mt-sRNA|Phe|H|631-CCA	tRF-5	CCA_0_mismatch	Mt_tRNA	H	sense	Phe	within gene boundary	631	647	577	647	CCA
ACTTAACTTGACCGCTCTGACCA	352.441	-2.59566	0.884097	-2.93594	0.00332537	0.021623	hsa|mt-sRNA|Val|H|1651|tRF-5|23|CCA	hsa|mt-sRNA|Val|H|1651-CCA	tRF-5	CCA_0_mismatch	Mt_tRNA	H	sense	Val	within gene boundary	1651	1670	1602	1670	CCA
ACTTGACCGCTCTGACCA	176.361	-3.11275	0.910547	-3.41855	0.000629553	0.00806917	hsa|mt-sRNA|Val|H|1656|tRF-5|18|CCA	hsa|mt-sRNA|Val|H|1656-CCA	tRF-5	CCA_0_mismatch	Mt_tRNA	H	sense	Val	within gene boundary	1656	1670	1602	1670	CCA
AGTAAGGTCAGCTAAATAAGCTATCGGGCCCCCA	18.5598	3.91623	1.0259	3.81736	0.000134885	0.0029967	hsa|mt-sRNA|Met|H|4402|tRF-3|34|CCA	hsa|mt-sRNA|Met|H|4402-CCA	tRF-3	CCA_0_mismatch	Mt_tRNA	H	sense	Met	within gene boundary	4402	4432	4402	4469	CCA
ATATCATTGGTCGTGGTTGTAGTCCGTGCGAGAATACCA	1349.66	-2.93557	0.742414	-3.95409	7.68259e-05	0.00217891	hsa|mt-sRNA|Glu|L|14674|tRF-3|39|CCA	hsa|mt-sRNA|Glu|L|14674-CCA	tRF-3	CCA_0_mismatch	Mt_tRNA	L	sense	Glu	within gene boundary	14674	14709	14674	14742	CCA
ATCATTGGTCGTGGTTGTAGTCCGTGCGAGAATACCA	382.035	-4.90992	0.90605	-5.41904	5.99193e-08	2.10059e-05	hsa|mt-sRNA|Glu|L|14674|tRH-3|37|CCA	hsa|mt-sRNA|Glu|L|14674-CCA	tRNA-half-3	CCA_0_mismatch	Mt_tRNA	L	sense	Glu	within gene boundary	14674	14707	14674	14742	CCA
ATTAAGAGAACCAACACCTCTTTACAGTGACCA	17.9547	-2.25053	0.964961	-2.33225	0.0196873	0.0805006	hsa|mt-sRNA|Lys|H|8335|tRF-5|33|CCA	hsa|mt-sRNA|Lys|H|8335-CCA	tRF-5	CCA_0_mismatch	Mt_tRNA	H	sense	Lys	within gene boundary	8335	8364	8295	8364	CCA
CAACTTAACTTGACCGCTCTGACCA	401.778	-2.80132	0.888183	-3.15399	0.00161055	0.0140461	hsa|mt-sRNA|Val|H|1649|tRF-5|25|CCA	hsa|mt-sRNA|Val|H|1649-CCA	tRF-5	CCA_0_mismatch	Mt_tRNA	H	sense	Val	within gene boundary	1649	1670	1602	1670	CCA
ATTGGTCGTGGTTGTAGTCCGTGCGAGAATACCA	2186.46	-2.7508	0.66011	-4.16718	3.08389e-05	0.00111103	hsa|mt-sRNA|Glu|L|14674|tRH-3|34|CCA	hsa|mt-sRNA|Glu|L|14674-CCA	tRNA-half-3	CCA_0_mismatch	Mt_tRNA	L	sense	Glu	within gene boundary	14674	14704	14674	14742	CCA
ATTTCAACTTAACTTGACCGCTCTGACCA	107.879	-3.36733	1.0067	-3.34493	0.000823039	0.0095401	hsa|mt-sRNA|Val|H|1645|tRF-5|29|CCA	hsa|mt-sRNA|Val|H|1645-CCA	tRF-5	CCA_0_mismatch	Mt_tRNA	H	sense	Val	within gene boundary	1645	1670	1602	1670	CCA
CATATCATTGGTCGTGGTTGTAGTCCGTGCGAGAATACCA	60.5121	-2.95505	0.769751	-3.83896	0.000123554	0.00288943	hsa|mt-sRNA|Glu|L|14674|tRF-3|40|CCA	hsa|mt-sRNA|Glu|L|14674-CCA	tRF-3	CCA_0_mismatch	Mt_tRNA	L	sense	Glu	within gene boundary	14674	14710	14674	14742	CCA
CATGGCTTTCTCACCA	11.5997	-2.96134	1.01667	-2.9128	0.00358207	0.0226299	hsa|mt-sRNA|Ser2|H|12253|tRF-5|16|CCA	hsa|mt-sRNA|Ser2|H|12253-CCA	tRF-5	CCA_0_mismatch	Mt_tRNA	H	sense	Ser2	within gene boundary	12253	12265	12207	12265	CCA
CATTGGTCGTGGTTGTAGTCCGTGCGAGAATACCA	508.54	-2.86319	0.810758	-3.5315	0.000413216	0.00625929	hsa|mt-sRNA|Glu|L|14674|tRH-3|35|CCA	hsa|mt-sRNA|Glu|L|14674-CCA	tRNA-half-3	CCA_0_mismatch	Mt_tRNA	L	sense	Glu	within gene boundary	14674	14705	14674	14742	CCA
CGTGGTTGTAGTCCGTGCGAGAATACCA	873.136	-3.44065	0.85296	-4.03378	5.48865e-05	0.00166281	hsa|mt-sRNA|Glu|L|14674|tRF-3|28|CCA	hsa|mt-sRNA|Glu|L|14674-CCA	tRF-3	CCA_0_mismatch	Mt_tRNA	L	sense	Glu	within gene boundary	14674	14698	14674	14742	CCA
CTTCCCGTACTACCA	7.5488	-2.49742	0.970362	-2.57369	0.0100619	0.0477314	hsa|mt-sRNA|Met|H|4458|tRF-5|15|CCA	hsa|mt-sRNA|Met|H|4458-CCA	tRF-5	CCA_0_mismatch	Mt_tRNA	H	sense	Met	within gene boundary	4458	4469	4402	4469	CCA
CTTGACCGCTCTGACCA	171.55	-2.59237	0.610003	-4.24977	2.13992e-05	0.000891411	hsa|mt-sRNA|Val|H|1657|tRF-5|17|CCA	hsa|mt-sRNA|Val|H|1657-CCA	tRF-5	CCA_0_mismatch	Mt_tRNA	H	sense	Val	within gene boundary	1657	1670	1602	1670	CCA
GAAAATGTTTAGACGGGCTCACATCACCCCATAAACACCA	13.0346	-2.7017	1.10509	-2.44479	0.0144937	0.0649932	hsa|mt-sRNA|Phe|H|611|tRF-5|40|CCA	hsa|mt-sRNA|Phe|H|611-CCA	tRF-5	CCA_0_mismatch	Mt_tRNA	H	sense	Phe	within gene boundary	611	647	577	647	CCA
GACGGGCTCACATCACCCCATAAACACCA	30.6742	-3.77676	1.08397	-3.48419	0.000493635	0.00678367	hsa|mt-sRNA|Phe|H|622|tRF-5|29|CCA	hsa|mt-sRNA|Phe|H|622-CCA	tRF-5	CCA_0_mismatch	Mt_tRNA	H	sense	Phe	within gene boundary	622	647	577	647	CCA
CTTAACTTGACCGCTCTGACCA	126.397	-4.08975	0.945047	-4.32757	1.50767e-05	0.000717757	hsa|mt-sRNA|Val|H|1652|tRF-5|22|CCA	hsa|mt-sRNA|Val|H|1652-CCA	tRF-5	CCA_0_mismatch	Mt_tRNA	H	sense	Val	within gene boundary	1652	1670	1602	1670	CCA
GATGGTTTTTCATATCATTGGTCGTGGTTGTAGTCCGTGCGAGAATACCA	44.7812	-2.64492	1.14573	-2.30851	0.0209708	0.0837222	hsa|mt-sRNA|Glu|L|14674|tRF-3|50|CCA	hsa|mt-sRNA|Glu|L|14674-CCA	tRF-3	CCA_0_mismatch	Mt_tRNA	L	sense	Glu	within gene boundary	14674	14720	14674	14742	CCA
GATTTCAACTTAACTTGACCGCTCTGACCA	391.542	-2.70225	0.875173	-3.08767	0.00201733	0.0158182	hsa|mt-sRNA|Val|H|1644|tRF-5|30|CCA	hsa|mt-sRNA|Val|H|1644-CCA	tRF-5	CCA_0_mismatch	Mt_tRNA	H	sense	Val	within gene boundary	1644	1670	1602	1670	CCA
GCTCACATCACCCCATAAACACCA	11.7106	-2.87032	0.98338	-2.91883	0.00351345	0.022438	hsa|mt-sRNA|Phe|H|627|tRF-5|24|CCA	hsa|mt-sRNA|Phe|H|627-CCA	tRF-5	CCA_0_mismatch	Mt_tRNA	H	sense	Phe	within gene boundary	627	647	577	647	CCA
GGTCGTGGTTGTAGTCCGTGCGAGAATACCA	25.0054	-2.37501	0.858254	-2.76726	0.00565302	0.0315292	hsa|mt-sRNA|Glu|L|14674|tRH-3|31|CCA	hsa|mt-sRNA|Glu|L|14674-CCA	tRNA-half-3	CCA_0_mismatch	Mt_tRNA	L	sense	Glu	within gene boundary	14674	14701	14674	14742	CCA
GTCGTGGTTGTAGTCCGTGCGAGAATACCA	62.4889	-2.11584	0.946348	-2.23579	0.0253656	0.0957855	hsa|mt-sRNA|Glu|L|14674|tRF-3|30|CCA	hsa|mt-sRNA|Glu|L|14674-CCA	tRF-3	CCA_0_mismatch	Mt_tRNA	L	sense	Glu	within gene boundary	14674	14700	14674	14742	CCA
GTGGTTGTAGTCCGTGCGAGAATACCA	2250.69	-3.91659	0.72913	-5.37159	7.80466e-08	2.10059e-05	hsa|mt-sRNA|Glu|L|14674|tRF-3|27|CCA	hsa|mt-sRNA|Glu|L|14674-CCA	tRF-3	CCA_0_mismatch	Mt_tRNA	L	sense	Glu	within gene boundary	14674	14697	14674	14742	CCA
GTTAGGCCTCTTTTTACCACCA	12.9891	-5.41582	1.25445	-4.31728	1.57967e-05	0.000726104	hsa|mt-sRNA|Tyr|L|5826|tRF-3|22|CCA	hsa|mt-sRNA|Tyr|L|5826-CCA	tRF-3	CCA_0_mismatch	Mt_tRNA	L	sense	Tyr	within gene boundary	5826	5844	5826	5891	CCA
GTTGTAGTCCGTGCGAGAATACCA	57.3854	-3.23582	0.79963	-4.04664	5.19575e-05	0.00161068	hsa|mt-sRNA|Glu|L|14674|tRF-3|24|CCA	hsa|mt-sRNA|Glu|L|14674-CCA	tRF-3	CCA_0_mismatch	Mt_tRNA	L	sense	Glu	within gene boundary	14674	14694	14674	14742	CCA
TAACTTGACCGCTCTGACCA	234.405	-4.22272	0.893572	-4.72566	2.29369e-06	0.000191093	hsa|mt-sRNA|Val|H|1654|tRF-5|20|CCA	hsa|mt-sRNA|Val|H|1654-CCA	tRF-5	CCA_0_mismatch	Mt_tRNA	H	sense	Val	within gene boundary	1654	1670	1602	1670	CCA
TATCATTGGTCGTGGTTGTAGTCCGTGCGAGAATACCA	397.478	-2.54479	0.780198	-3.26173	0.00110735	0.0110156	hsa|mt-sRNA|Glu|L|14674|tRF-3|38|CCA	hsa|mt-sRNA|Glu|L|14674-CCA	tRF-3	CCA_0_mismatch	Mt_tRNA	L	sense	Glu	within gene boundary	14674	14708	14674	14742	CCA
TCAACTTAACTTGACCGCTCTGACCA	365.202	-3.48249	0.969177	-3.59324	0.000326588	0.00558131	hsa|mt-sRNA|Val|H|1648|tRF-5|26|CCA	hsa|mt-sRNA|Val|H|1648-CCA	tRF-5	CCA_0_mismatch	Mt_tRNA	H	sense	Val	within gene boundary	1648	1670	1602	1670	CCA
TCATTGGTCGTGGTTGTAGTCCGTGCGAGAATACCA	217.867	-3.67759	0.869155	-4.23123	2.32417e-05	0.000911211	hsa|mt-sRNA|Glu|L|14674|tRH-3|36|CCA	hsa|mt-sRNA|Glu|L|14674-CCA	tRNA-half-3	CCA_0_mismatch	Mt_tRNA	L	sense	Glu	within gene boundary	14674	14706	14674	14742	CCA
TCATATCATTGGTCGTGGTTGTAGTCCGTGCGAGAATACCA	512.104	-3.44436	0.902099	-3.81816	0.000134452	0.0029967	hsa|mt-sRNA|Glu|L|14674|tRF-3|41|CCA	hsa|mt-sRNA|Glu|L|14674-CCA	tRF-3	CCA_0_mismatch	Mt_tRNA	L	sense	Glu	within gene boundary	14674	14711	14674	14742	CCA
TCGTGGTTGTAGTCCGTGCGAGAATACCA	1409.52	-3.85725	0.902453	-4.27418	1.91843e-05	0.000824927	hsa|mt-sRNA|Glu|L|14674|tRF-3|29|CCA	hsa|mt-sRNA|Glu|L|14674-CCA	tRF-3	CCA_0_mismatch	Mt_tRNA	L	sense	Glu	within gene boundary	14674	14699	14674	14742	CCA
TGACCGCTCTGACCA	244.933	-2.34611	0.62815	-3.73495	0.00018775	0.00373538	hsa|mt-sRNA|Val|H|1659|tRF-5|15|CCA	hsa|mt-sRNA|Val|H|1659-CCA	tRF-5	CCA_0_mismatch	Mt_tRNA	H	sense	Val	within gene boundary	1659	1670	1602	1670	CCA
TGGTTGTAGTCCGTGCGAGAATACCA	32.779	-2.8138	0.804005	-3.49972	0.000465739	0.00653505	hsa|mt-sRNA|Glu|L|14674|tRF-3|26|CCA	hsa|mt-sRNA|Glu|L|14674-CCA	tRF-3	CCA_0_mismatch	Mt_tRNA	L	sense	Glu	within gene boundary	14674	14696	14674	14742	CCA
TGGTCGTGGTTGTAGTCCGTGCGAGAATACCA	450.394	-2.96297	0.699697	-4.23464	2.28918e-05	0.000911211	hsa|mt-sRNA|Glu|L|14674|tRH-3|32|CCA	hsa|mt-sRNA|Glu|L|14674-CCA	tRNA-half-3	CCA_0_mismatch	Mt_tRNA	L	sense	Glu	within gene boundary	14674	14702	14674	14742	CCA
TGTAGTCCGTGCGAGAATACCA	65.8903	-3.4821	0.847586	-4.10826	3.9865e-05	0.0012961	hsa|mt-sRNA|Glu|L|14674|tRF-3|22|CCA	hsa|mt-sRNA|Glu|L|14674-CCA	tRF-3	CCA_0_mismatch	Mt_tRNA	L	sense	Glu	within gene boundary	14674	14692	14674	14742	CCA
TTAACTTGACCGCTCTGACCA	305.975	-4.63472	0.93123	-4.97698	6.45825e-07	9.56538e-05	hsa|mt-sRNA|Val|H|1653|tRF-5|21|CCA	hsa|mt-sRNA|Val|H|1653-CCA	tRF-5	CCA_0_mismatch	Mt_tRNA	H	sense	Val	within gene boundary	1653	1670	1602	1670	CCA
TTAACTAAGTGTTTGTGGGTTTAAGTCCCATTGGTCTAGCCA	142.534	-2.98518	1.08996	-2.7388	0.00616632	0.0332338	hsa|mt-sRNA|Asn|L|5657|tRF-3|42|CCA	hsa|mt-sRNA|Asn|L|5657-CCA	tRF-3	CCA_0_mismatch	Mt_tRNA	L	sense	Asn	within gene boundary	5657	5695	5657	5729	CCA
TTATACCCTTCCCGTACTACCA	14.6192	-4.72742	1.29892	-3.63949	0.000273183	0.00472926	hsa|mt-sRNA|Met|H|4451|tRF-5|22|CCA	hsa|mt-sRNA|Met|H|4451-CCA	tRF-5	CCA_0_mismatch	Mt_tRNA	H	sense	Met	within gene boundary	4451	4469	4402	4469	CCA
TTCAACTTAACTTGACCGCTCTGACCA	206.768	-2.77818	0.917211	-3.02894	0.00245415	0.0182759	hsa|mt-sRNA|Val|H|1647|tRF-5|27|CCA	hsa|mt-sRNA|Val|H|1647-CCA	tRF-5	CCA_0_mismatch	Mt_tRNA	H	sense	Val	within gene boundary	1647	1670	1602	1670	CCA
TTGACCGCTCTGACCA	429.374	-3.00174	0.729095	-4.11707	3.83719e-05	0.0012961	hsa|mt-sRNA|Val|H|1658|tRF-5|16|CCA	hsa|mt-sRNA|Val|H|1658-CCA	tRF-5	CCA_0_mismatch	Mt_tRNA	H	sense	Val	within gene boundary	1658	1670	1602	1670	CCA
TTGGTCGTGGTTGTAGTCCGTGCGAGAATACCA	1464.88	-2.41319	0.770908	-3.13033	0.00174611	0.0144569	hsa|mt-sRNA|Glu|L|14674|tRH-3|33|CCA	hsa|mt-sRNA|Glu|L|14674-CCA	tRNA-half-3	CCA_0_mismatch	Mt_tRNA	L	sense	Glu	within gene boundary	14674	14703	14674	14742	CCA
TTTCATATCATTGGTCGTGGTTGTAGTCCGTGCGAGAATACCA	55.8031	-2.04714	0.904398	-2.26354	0.0236025	0.0917264	hsa|mt-sRNA|Glu|L|14674|tRF-3|43|CCA	hsa|mt-sRNA|Glu|L|14674-CCA	tRF-3	CCA_0_mismatch	Mt_tRNA	L	sense	Glu	within gene boundary	14674	14713	14674	14742	CCA
TTGTAGTCCGTGCGAGAATACCA	46.2171	-2.761	0.747769	-3.69232	0.000222221	0.00417211	hsa|mt-sRNA|Glu|L|14674|tRF-3|23|CCA	hsa|mt-sRNA|Glu|L|14674-CCA	tRF-3	CCA_0_mismatch	Mt_tRNA	L	sense	Glu	within gene boundary	14674	14693	14674	14742	CCA
TTTCAACTTAACTTGACCGCTCTGACCA	401.265	-2.36112	0.942763	-2.50447	0.0122636	0.0571941	hsa|mt-sRNA|Val|H|1646|tRF-5|28|CCA	hsa|mt-sRNA|Val|H|1646-CCA	tRF-5	CCA_0_mismatch	Mt_tRNA	H	sense	Val	within gene boundary	1646	1670	1602	1670	CCA
TTTTCATATCATTGGTCGTGGTTGTAGTCCGTGCGAGAATACCA	62.3891	-2.40335	0.842143	-2.85386	0.00431922	0.0259347	hsa|mt-sRNA|Glu|L|14674|tRF-3|44|CCA	hsa|mt-sRNA|Glu|L|14674-CCA	tRF-3	CCA_0_mismatch	Mt_tRNA	L	sense	Glu	within gene boundary	14674	14714	14674	14742	CCA

## Sheet: hep-B vs no-cancer_annot
sequence	baseMean	log2FoldChange	lfcSE	stat	pvalue	padj	Specific-ID	General-ID	subtype	type	bio-type	strand	orientation	annotation	Sequence alignment	Sequence start position(bp)	Sequence end position(bp)	gene-boundary:start(bp)	gene-boundary:end(bp)	substitutions
AAAATGTTTAGACGGGCT	14.2002	-2.13683	0.778562	-2.74459	0.00605868	0.0464968	hsa|mt-sRNA|Phe|H|612|i-tRF-3|18|	hsa|mt-sRNA|Phe|H|612	i-tRF-3	normal_1_mismatch	Mt_tRNA	H	sense	Phe	within gene boundary	612	629	577	647
AAAATGTTTAGACGGGCTC	113.982	-2.84287	1.08058	-2.63086	0.00851685	0.0579534	hsa|mt-sRNA|Phe|H|612|i-tRF-3|19|	hsa|mt-sRNA|Phe|H|612	i-tRF-3	normal_1_mismatch	Mt_tRNA	H	sense	Phe	within gene boundary	612	630	577	647
AAAATGTTTAGACGGGCTCAC	3.60252	-3.12791	1.13005	-2.76795	0.00564108	0.0451044	hsa|mt-sRNA|Phe|H|612|i-tRF-3|21|	hsa|mt-sRNA|Phe|H|612	i-tRF-3	normal_1_mismatch	Mt_tRNA	H	sense	Phe	within gene boundary	612	632	577	647
AAAATTTTGGTGCAACTC	14.2562	-2.81522	0.887661	-3.17151	0.00151651	0.0190925	hsa|mt-sRNA|Leu2|H|12307|i-tRF-3|18|	hsa|mt-sRNA|Leu2|H|12307	i-tRF-3	normal_1_mismatch	Mt_tRNA	H	sense	Leu2	within gene boundary	12307	12324	12266	12336
AAACAAATGATTTCGACT	7.36802	-3.16541	0.907234	-3.48908	0.000484681	0.00898032	hsa|mt-sRNA|Arg|H|10423|i-tRF-5|18|4G13	hsa|mt-sRNA|Arg|H|10423	i-tRF-5	normal_1_mismatch	Mt_tRNA	H	sense	Arg	within gene boundary	10423	10440	10405	10469	4G13
AAACAAATGATTTCGACTC	15.4485	-3.88569	0.979912	-3.96535	7.32893e-05	0.00197178	hsa|mt-sRNA|Arg|H|10423|i-tRF-5|19|4G14	hsa|mt-sRNA|Arg|H|10423	i-tRF-5	normal_1_mismatch	Mt_tRNA	H	sense	Arg	within gene boundary	10423	10441	10405	10469	4G14
AAACAAATGATTTCGACTCA	9.90361	-2.88427	0.964279	-2.99111	0.00277963	0.0292735	hsa|mt-sRNA|Arg|H|10423|i-tRF-5|20|4G15	hsa|mt-sRNA|Arg|H|10423	i-tRF-5	normal_1_mismatch	Mt_tRNA	H	sense	Arg	within gene boundary	10423	10442	10405	10469	4G15
AAACGAATGATTTCGACT	20.6704	-2.16846	0.913859	-2.37286	0.0176509	0.0954997	hsa|mt-sRNA|Arg|H|10423|i-tRF-5|18|	hsa|mt-sRNA|Arg|H|10423	i-tRF-5	normal_1_mismatch	Mt_tRNA	H	sense	Arg	within gene boundary	10423	10440	10405	10469
AAACGAATGATTTCGACTC	75.3288	-2.37232	0.89445	-2.65227	0.00799526	0.0560811	hsa|mt-sRNA|Arg|H|10423|i-tRF-5|19|	hsa|mt-sRNA|Arg|H|10423	i-tRF-5	normal_1_mismatch	Mt_tRNA	H	sense	Arg	within gene boundary	10423	10441	10405	10469
AAACATCAGATTGTGAATCTGACACC	120.446	-2.87585	1.1845	-2.42791	0.0151861	0.0849509	hsa|mt-sRNA|His|H|12156|i-tRF-5|26|24A1	hsa|mt-sRNA|His|H|12156	i-tRF-5	normal_1_mismatch	Mt_tRNA	H	sense	His	within gene boundary	12156	12181	12138	12206	24A1
AAACATCAGATTGTGAATCTGACC	16.6011	-2.97599	0.98514	-3.02088	0.0025204	0.0276769	hsa|mt-sRNA|His|H|12156|i-tRF-5|24|23A0	hsa|mt-sRNA|His|H|12156	i-tRF-5	normal_1_mismatch	Mt_tRNA	H	sense	His	within gene boundary	12156	12179	12138	12206	23A0
AAAAATTTTGGTGCAACTC	11.1391	-3.60708	1.01705	-3.5466	0.00039023	0.00758824	hsa|mt-sRNA|Leu2|H|12306|i-tRF-3|19|	hsa|mt-sRNA|Leu2|H|12306	i-tRF-3	normal_1_mismatch	Mt_tRNA	H	sense	Leu2	within gene boundary	12306	12324	12266	12336
AAAACATCAGATTGTGAATC	40.3016	-3.51582	1.00294	-3.50551	0.000455742	0.00860651	hsa|mt-sRNA|His|H|12155|i-tRF-5|20|	hsa|mt-sRNA|His|H|12155	i-tRF-5	normal_1_mismatch	Mt_tRNA	H	sense	His	within gene boundary	12155	12174	12138	12206
AAAACATCAGATTGTGAATCT	27.1871	-3.41383	1.17809	-2.89777	0.00375824	0.0348169	hsa|mt-sRNA|His|H|12155|i-tRF-5|21|	hsa|mt-sRNA|His|H|12155	i-tRF-5	normal_1_mismatch	Mt_tRNA	H	sense	His	within gene boundary	12155	12175	12138	12206
AAAACCTCAGATTGTGAATC	14.8931	-4.05583	1.21892	-3.3274	0.000876614	0.0131016	hsa|mt-sRNA|His|H|12155|i-tRF-5|20|5A14	hsa|mt-sRNA|His|H|12155	i-tRF-5	normal_1_mismatch	Mt_tRNA	H	sense	His	within gene boundary	12155	12174	12138	12206	5A14
AAACGCATGATTTCGACTC	25.4464	-3.40225	0.841804	-4.04162	5.30821e-05	0.00146996	hsa|mt-sRNA|Arg|H|10423|i-tRF-5|19|5A13	hsa|mt-sRNA|Arg|H|10423	i-tRF-5	normal_1_mismatch	Mt_tRNA	H	sense	Arg	within gene boundary	10423	10441	10405	10469	5A13
AAACATCAGATTGTGAATC	41.9257	-2.70456	1.09695	-2.46553	0.0136813	0.0800721	hsa|mt-sRNA|His|H|12156|i-tRF-5|19|	hsa|mt-sRNA|His|H|12156	i-tRF-5	normal_1_mismatch	Mt_tRNA	H	sense	His	within gene boundary	12156	12174	12138	12206
AAACATCAGATTGTGAATCT	42.6281	-2.97884	1.12504	-2.64777	0.00810248	0.0562079	hsa|mt-sRNA|His|H|12156|i-tRF-5|20|	hsa|mt-sRNA|His|H|12156	i-tRF-5	normal_1_mismatch	Mt_tRNA	H	sense	His	within gene boundary	12156	12175	12138	12206
AAAGCACCCAACTTACACTTAGGAGATTTCAACTTAACTTGACCGCTCTG	15.6265	4.55297	1.0199	4.46413	8.03964e-06	0.000438607	hsa|mt-sRNA|Val|H|1620|tRF-3|50|	hsa|mt-sRNA|Val|H|1620	tRF-3	normal_1_mismatch	Mt_tRNA	H	sense	Val	within gene boundary	1620	1669	1602	1670
AAAGATTAAGAGAACC	109.55	-2.49806	0.698245	-3.57763	0.000346723	0.00699627	hsa|mt-sRNA|Lys|H|8331|i-tRF-3|16|	hsa|mt-sRNA|Lys|H|8331	i-tRF-3	normal_1_mismatch	Mt_tRNA	H	sense	Lys	within gene boundary	8331	8346	8295	8364
AAAGATTAAGAGAACCAACAC	14.1005	-2.69773	0.770557	-3.50102	0.00046348	0.00866929	hsa|mt-sRNA|Lys|H|8331|i-tRF-3|21|	hsa|mt-sRNA|Lys|H|8331	i-tRF-3	normal_1_mismatch	Mt_tRNA	H	sense	Lys	within gene boundary	8331	8351	8295	8364
AAAGATTAAGAGAACCAACACC	38.1066	-3.80512	0.714257	-5.32738	9.96383e-08	2.44612e-05	hsa|mt-sRNA|Lys|H|8331|i-tRF-3|22|	hsa|mt-sRNA|Lys|H|8331	i-tRF-3	normal_1_mismatch	Mt_tRNA	H	sense	Lys	within gene boundary	8331	8352	8295	8364
AAAGATTAAGAGAACCAACACCT	17.414	-2.91998	0.980872	-2.97692	0.0029116	0.0299391	hsa|mt-sRNA|Lys|H|8331|i-tRF-3|23|	hsa|mt-sRNA|Lys|H|8331	i-tRF-3	normal_1_mismatch	Mt_tRNA	H	sense	Lys	within gene boundary	8331	8353	8295	8364
AAATAAGCTATCGGGCC	19.9452	-2.67815	0.936358	-2.86018	0.00423404	0.0381012	hsa|mt-sRNA|Met|H|4415|i-tRF-5|17|	hsa|mt-sRNA|Met|H|4415	i-tRF-5	normal_1_mismatch	Mt_tRNA	H	sense	Met	within gene boundary	4415	4431	4402	4469
AAATGTTTAGACGGGCT	4.81413	-2.92846	1.01902	-2.87381	0.00405552	0.0368751	hsa|mt-sRNA|Phe|H|613|i-tRF-3|17|	hsa|mt-sRNA|Phe|H|613	i-tRF-3	normal_1_mismatch	Mt_tRNA	H	sense	Phe	within gene boundary	613	629	577	647
AACAAATGATTTCGACTCA	8.46773	-2.61389	1.04637	-2.49804	0.0124881	0.0752351	hsa|mt-sRNA|Arg|H|10424|i-tRF-5|19|3G15	hsa|mt-sRNA|Arg|H|10424	i-tRF-5	normal_1_mismatch	Mt_tRNA	H	sense	Arg	within gene boundary	10424	10442	10405	10469	3G15
AACAGCTAAGGACTGC	180.554	-2.82781	1.15859	-2.44074	0.0146572	0.0839265	hsa|mt-sRNA|Ala|H|as5581|i-tRF-5|16|	hsa|mt-sRNA|Ala|H|as5581	i-tRF-5	normal_1_mismatch	Mt_tRNA	H	anti-sense	Ala	overlap gene boundary	5581	5596	5587	5655
AACAGCTAAGGACTGCAAAACC	25.3399	-2.58303	0.831269	-3.10733	0.00188784	0.0220697	hsa|mt-sRNA|Ala|H|as5581|i-tRF-5|22|	hsa|mt-sRNA|Ala|H|as5581	i-tRF-5	normal_1_mismatch	Mt_tRNA	H	anti-sense	Ala	overlap gene boundary	5581	5602	5587	5655
AACAGCTAAGGACTGCAAAACCC	26.8554	-2.08956	0.797202	-2.62112	0.0087642	0.0581826	hsa|mt-sRNA|Ala|H|as5581|i-tRF-5|23|	hsa|mt-sRNA|Ala|H|as5581	i-tRF-5	normal_1_mismatch	Mt_tRNA	H	anti-sense	Ala	overlap gene boundary	5581	5603	5587	5655
AACAGCTATCCATTGGTC	32.8248	-1.65442	0.657421	-2.51654	0.0118515	0.0725121	hsa|mt-sRNA|Leu2|H|12279|i-tRF-5|18|	hsa|mt-sRNA|Leu2|H|12279	i-tRF-5	normal_1_mismatch	Mt_tRNA	H	sense	Leu2	within gene boundary	12279	12296	12266	12336
AACATCAGATTGTGAATC	21.3167	-2.05627	0.844198	-2.43576	0.0148603	0.0841087	hsa|mt-sRNA|His|H|12157|i-tRF-5|18|	hsa|mt-sRNA|His|H|12157	i-tRF-5	normal_1_mismatch	Mt_tRNA	H	sense	His	within gene boundary	12157	12174	12138	12206
AACATCAGATTGTGAATCT	17.5179	-3.37495	1.19543	-2.82322	0.00475441	0.0408461	hsa|mt-sRNA|His|H|12157|i-tRF-5|19|	hsa|mt-sRNA|His|H|12157	i-tRF-5	normal_1_mismatch	Mt_tRNA	H	sense	His	within gene boundary	12157	12175	12138	12206
AACATCAGATTGTGAATCTGACC	13.432	-2.61181	0.760313	-3.43518	0.00059217	0.0102019	hsa|mt-sRNA|His|H|12157|i-tRF-5|23|22A0	hsa|mt-sRNA|His|H|12157	i-tRF-5	normal_1_mismatch	Mt_tRNA	H	sense	His	within gene boundary	12157	12179	12138	12206	22A0
AACATGGCTTTCTCACC	7.8739	-3.16396	0.866699	-3.65059	0.000261641	0.00558548	hsa|mt-sRNA|Ser2|H|12251|tRF-3|17|15A1	hsa|mt-sRNA|Ser2|H|12251	tRF-3	normal_1_mismatch	Mt_tRNA	H	sense	Ser2	within gene boundary	12251	12267	12207	12265	15A1
AACTGCTAACTCATGCCCCCATGTCTAACA	10.6149	-2.7056	0.950926	-2.84523	0.00443792	0.0396185	hsa|mt-sRNA|Ser2|H|12222|i-tRF-5|30|	hsa|mt-sRNA|Ser2|H|12222	i-tRF-5	normal_1_mismatch	Mt_tRNA	H	sense	Ser2	within gene boundary	12222	12251	12207	12265
AACTTGACCGCTCTGACC	239.188	-2.38204	0.849397	-2.80439	0.00504118	0.0421314	hsa|mt-sRNA|Val|H|1655|tRF-3|18|16G1	hsa|mt-sRNA|Val|H|1655	tRF-3	normal_1_mismatch	Mt_tRNA	H	sense	Val	within gene boundary	1655	1672	1602	1670	16G1
AAGAACTGCTAACTCATGCCCCCATGTCTAACAACATGGCA	40.947	5.45161	1.3039	4.18101	2.90216e-05	0.000984939	hsa|mt-sRNA|Ser2|H|12219|i-tRF-5|41|40T0	hsa|mt-sRNA|Ser2|H|12219	i-tRF-5	normal_1_mismatch	Mt_tRNA	H	sense	Ser2	within gene boundary	12219	12259	12207	12265	40T0
AAGAACTGCTAACTCATGCCCCCATGTCTAACAACATGGCTTTCTCA	10.6576	2.29042	0.873663	2.62163	0.00875113	0.0581826	hsa|mt-sRNA|Ser2|H|12219|tRF-3|47|	hsa|mt-sRNA|Ser2|H|12219	tRF-3	normal_1_mismatch	Mt_tRNA	H	sense	Ser2	within gene boundary	12219	12265	12207	12265
AAGAACTGCTAACTCATGCCCCCATGTCTAACAACATGGCTTTCTCACCT	68.9968	1.51109	0.528521	2.85909	0.00424856	0.0381012	hsa|mt-sRNA|Ser2|H|12219|tRF-3|50|47A2	hsa|mt-sRNA|Ser2|H|12219	tRF-3	normal_1_mismatch	Mt_tRNA	H	sense	Ser2	within gene boundary	12219	12268	12207	12265	47A2
AAGAGTGTAGCTTAACACAAAGCACCCA	8.05073	-3.27902	1.08417	-3.02443	0.00249098	0.02764	hsa|mt-sRNA|Val|H|1602|tRF-5|28|0C27	hsa|mt-sRNA|Val|H|1602	tRF-5	normal_1_mismatch	Mt_tRNA	H	sense	Val	within gene boundary	1602	1629	1602	1670	0C27
AAGATGGCAGAGCCC	8.75219	-2.51002	0.77014	-3.25917	0.00111739	0.0155642	hsa|mt-sRNA|Leu|H|3233|tRF-5|15|	hsa|mt-sRNA|Leu|H|3233	tRF-5	normal_1_mismatch	Mt_tRNA	H	sense	Leu	within gene boundary	3233	3247	3230	3304
AAGATTAAGAGAACC	158.554	-2.26136	0.820922	-2.75465	0.00587541	0.0461572	hsa|mt-sRNA|Lys|H|8332|i-tRF-3|15|	hsa|mt-sRNA|Lys|H|8332	i-tRF-3	normal_1_mismatch	Mt_tRNA	H	sense	Lys	within gene boundary	8332	8346	8295	8364
AAGATTAAGAGAACCAACACC	45.0097	-3.26326	0.751081	-4.34476	1.39431e-05	0.000610216	hsa|mt-sRNA|Lys|H|8332|i-tRF-3|21|	hsa|mt-sRNA|Lys|H|8332	i-tRF-3	normal_1_mismatch	Mt_tRNA	H	sense	Lys	within gene boundary	8332	8352	8295	8364
AAGATTAAGAGAACCAACACCT	19.3828	-3.61802	1.04783	-3.45286	0.000554681	0.00980504	hsa|mt-sRNA|Lys|H|8332|i-tRF-3|22|	hsa|mt-sRNA|Lys|H|8332	i-tRF-3	normal_1_mismatch	Mt_tRNA	H	sense	Lys	within gene boundary	8332	8353	8295	8364
AAGATTAAGAGAACCAACACCTCT	21.7238	-4.27252	1.0138	-4.21438	2.50464e-05	0.000964533	hsa|mt-sRNA|Lys|H|8332|i-tRF-3|24|	hsa|mt-sRNA|Lys|H|8332	i-tRF-3	normal_1_mismatch	Mt_tRNA	H	sense	Lys	within gene boundary	8332	8355	8295	8364
AAGCTCACAAGAACTGCTAACTCATGCCCCCATGTCTAACAACATGGCTT	18.4061	4.06514	0.975409	4.16763	3.07784e-05	0.000987323	hsa|mt-sRNA|Ser2|H|12211|i-tRF-5|50|	hsa|mt-sRNA|Ser2|H|12211	i-tRF-5	normal_1_mismatch	Mt_tRNA	H	sense	Ser2	within gene boundary	12211	12260	12207	12265
AAGGTATTAGAAAAACCATTTCATAACTTTGTCAAAGTTAAATTATAGGC	9.11641	5.96866	1.36397	4.37595	1.20904e-05	0.00059364	hsa|mt-sRNA|Asp|H|7518|tRF-5|50|	hsa|mt-sRNA|Asp|H|7518	tRF-5	normal_1_mismatch	Mt_tRNA	H	sense	Asp	within gene boundary	7518	7567	7518	7585
AAGGTATTGGAAAAACCATTTCATAACTTTGTCAAAGTTA	15.9839	4.83905	1.75559	2.75638	0.00584456	0.0460993	hsa|mt-sRNA|Asp|H|7518|tRF-5|40|8A31	hsa|mt-sRNA|Asp|H|7518	tRF-5	normal_1_mismatch	Mt_tRNA	H	sense	Asp	within gene boundary	7518	7557	7518	7585	8A31
AAGGTATTGGAAAAACCATTTCATAACTTTGTCAAAGTTAAATTATAGGC	30.2907	4.66792	0.935797	4.98818	6.09509e-07	7.50514e-05	hsa|mt-sRNA|Asp|H|7518|tRF-5|50|8A41	hsa|mt-sRNA|Asp|H|7518	tRF-5	normal_1_mismatch	Mt_tRNA	H	sense	Asp	within gene boundary	7518	7567	7518	7585	8A41
AAGGTATTTGAAAAACCATTTCATAACTTTGTCAAAGTTAAATTATAGGC	8.32517	5.81336	1.37925	4.21487	2.49922e-05	0.000964533	hsa|mt-sRNA|Asp|H|7518|tRF-5|50|8A41	hsa|mt-sRNA|Asp|H|7518	tRF-5	normal_1_mismatch	Mt_tRNA	H	sense	Asp	within gene boundary	7518	7567	7518	7585	8A41
AATAATAGGAGCTTAAACC	7.76405	-2.39582	0.967321	-2.47676	0.0132582	0.0788627	hsa|mt-sRNA|Ile|H|4301|i-tRF-3|19|	hsa|mt-sRNA|Ile|H|4301	i-tRF-3	normal_1_mismatch	Mt_tRNA	H	sense	Ile	within gene boundary	4301	4319	4263	4331
AATAATAGGAGCTTAAACCC	54.3722	-3.58145	1.0485	-3.41579	0.000635983	0.0106758	hsa|mt-sRNA|Ile|H|4301|i-tRF-3|20|	hsa|mt-sRNA|Ile|H|4301	i-tRF-3	normal_1_mismatch	Mt_tRNA	H	sense	Ile	within gene boundary	4301	4320	4263	4331
AATAGGAGCTTAAACC	11.018	-2.24963	0.876307	-2.56717	0.0102532	0.0655935	hsa|mt-sRNA|Ile|H|4304|i-tRF-3|16|	hsa|mt-sRNA|Ile|H|4304	i-tRF-3	normal_1_mismatch	Mt_tRNA	H	sense	Ile	within gene boundary	4304	4319	4263	4331
AATAGGAGCTTAAACCC	97.28	-3.49196	0.905375	-3.85692	0.000114824	0.00281892	hsa|mt-sRNA|Ile|H|4304|i-tRF-3|17|	hsa|mt-sRNA|Ile|H|4304	i-tRF-3	normal_1_mismatch	Mt_tRNA	H	sense	Ile	within gene boundary	4304	4320	4263	4331
AATGATTTCGACTCA	66.9509	-3.26499	0.673681	-4.8465	1.25659e-06	0.000132436	hsa|mt-sRNA|Arg|H|10428|i-tRF-5|15|	hsa|mt-sRNA|Arg|H|10428	i-tRF-5	normal_1_mismatch	Mt_tRNA	H	sense	Arg	within gene boundary	10428	10442	10405	10469
AATGTTGGTTATACC	13.1037	-3.46261	0.943658	-3.66934	0.000243174	0.00524829	hsa|mt-sRNA|Met|H|4443|i-tRF-3|15|	hsa|mt-sRNA|Met|H|4443	i-tRF-3	normal_1_mismatch	Mt_tRNA	H	sense	Met	within gene boundary	4443	4457	4402	4469
ACAAGAACTGCTAACTCATGCCCCCATGTCTAACAACATGG	28.1539	3.73174	1.35857	2.74682	0.00601758	0.0464968	hsa|mt-sRNA|Ser2|H|12217|i-tRF-5|41|	hsa|mt-sRNA|Ser2|H|12217	i-tRF-5	normal_1_mismatch	Mt_tRNA	H	sense	Ser2	within gene boundary	12217	12257	12207	12265
ACAAGAACTGCTAACTCATGCCCCCATGTCTAACAACATGGCTTTCT	63.9065	3.0899	0.925677	3.33799	0.000843876	0.0131016	hsa|mt-sRNA|Ser2|H|12217|tRF-3|47|	hsa|mt-sRNA|Ser2|H|12217	tRF-3	normal_1_mismatch	Mt_tRNA	H	sense	Ser2	within gene boundary	12217	12263	12207	12265
ACAAGAACTGCTAACTCATGCCCCCATGTCTAACAACATGGCTTTCTCAC	44.7263	1.96689	0.525325	3.74413	0.000181018	0.00410807	hsa|mt-sRNA|Ser2|H|12217|tRF-3|50|49A0	hsa|mt-sRNA|Ser2|H|12217	tRF-3	normal_1_mismatch	Mt_tRNA	H	sense	Ser2	within gene boundary	12217	12266	12207	12265	49A0
ACAAGAACTGCTAACTCATGCCCCCATGTCTAACAACATGGCTTTCTCAT	7.25808	2.93929	0.859648	3.41918	0.000628113	0.0106346	hsa|mt-sRNA|Ser2|H|12217|tRF-3|50|49A0	hsa|mt-sRNA|Ser2|H|12217	tRF-3	normal_1_mismatch	Mt_tRNA	H	sense	Ser2	within gene boundary	12217	12266	12207	12265	49A0
ACATGGCTTTCTCACC	25.977	-2.29428	0.796909	-2.87898	0.00398969	0.0364454	hsa|mt-sRNA|Ser2|H|12252|tRF-3|16|14A1	hsa|mt-sRNA|Ser2|H|12252	tRF-3	normal_1_mismatch	Mt_tRNA	H	sense	Ser2	within gene boundary	12252	12267	12207	12265	14A1
ACCTTTTAAGTTAAAGATTAAGAGAACCAACACCTCTTTACAGTGAC	34.5651	3.2066	1.16099	2.76196	0.00574559	0.0455014	hsa|mt-sRNA|Lys|H|8319|tRF-3|47|46A0	hsa|mt-sRNA|Lys|H|8319	tRF-3	normal_1_mismatch	Mt_tRNA	H	sense	Lys	within gene boundary	8319	8365	8295	8364	46A0
ACTAAGTGTTTGTGGGTTTAAGTCCCATTGGTCTA	10.151	2.79934	0.992697	2.81994	0.00480333	0.0410162	hsa|mt-sRNA|Asn|L|5658|tRF-3|35|	hsa|mt-sRNA|Asn|L|5658	tRF-3	normal_1_mismatch	Mt_tRNA	L	sense	Asn	within gene boundary	5658	5692	5657	5729
ACTTTGTCAAAGTTAAATTATAGGCT	11.7476	2.4773	0.916017	2.70442	0.0068423	0.0510961	hsa|mt-sRNA|Asp|H|7543|i-tRF-5|26|	hsa|mt-sRNA|Asp|H|7543	i-tRF-5	normal_1_mismatch	Mt_tRNA	H	sense	Asp	within gene boundary	7543	7568	7518	7585
AGAAAGCTCACAAGAACTGCTAACTCATGCCCCCATGTCTAACAACA	156.511	4.83887	1.15532	4.18832	2.81027e-05	0.000984939	hsa|mt-sRNA|Ser2|H|12208|tRF-5|47|	hsa|mt-sRNA|Ser2|H|12208	tRF-5	normal_1_mismatch	Mt_tRNA	H	sense	Ser2	within gene boundary	12208	12254	12207	12265
AGAACTGCTAACTCATGCCCCCATGTCTAACA	33.594	-2.8218	1.13991	-2.47545	0.0133068	0.0788627	hsa|mt-sRNA|Ser2|H|12220|i-tRF-5|32|	hsa|mt-sRNA|Ser2|H|12220	i-tRF-5	normal_1_mismatch	Mt_tRNA	H	sense	Ser2	within gene boundary	12220	12251	12207	12265
AGAACTGCTAACTCATGCCCCCATGTCTAACAACA	26.86	-2.25636	0.821017	-2.74825	0.00599141	0.0464968	hsa|mt-sRNA|Ser2|H|12220|i-tRF-5|35|	hsa|mt-sRNA|Ser2|H|12220	i-tRF-5	normal_1_mismatch	Mt_tRNA	H	sense	Ser2	within gene boundary	12220	12254	12207	12265
AGACGGGCTCACATC	28.2679	-2.27326	0.769835	-2.95292	0.00314787	0.0315262	hsa|mt-sRNA|Phe|H|621|i-tRF-3|15|	hsa|mt-sRNA|Phe|H|621	i-tRF-3	normal_1_mismatch	Mt_tRNA	H	sense	Phe	within gene boundary	621	635	577	647
AGCACCCAACTTACACTTAGGAGATTTCAACTTAACTTGACCGCTCTGAC	26.4456	2.98225	0.983619	3.03191	0.00243008	0.0272724	hsa|mt-sRNA|Val|H|1622|tRF-3|50|49G0	hsa|mt-sRNA|Val|H|1622	tRF-3	normal_1_mismatch	Mt_tRNA	H	sense	Val	within gene boundary	1622	1671	1602	1670	49G0
AGTAAGGTCCGCTAAATAAGCTATCGGGCCC	1.47762	3.18588	1.30854	2.43468	0.0149048	0.084118	hsa|mt-sRNA|Met|H|4402|tRF-5|31|9A21	hsa|mt-sRNA|Met|H|4402	tRF-5	normal_1_mismatch	Mt_tRNA	H	sense	Met	within gene boundary	4402	4432	4402	4469	9A21
AGTGAAGCATTGGAC	5.57613	-2.37682	0.817635	-2.90694	0.0036498	0.0341343	hsa|mt-sRNA|Tyr|L|5864|i-tRF-5|15|	hsa|mt-sRNA|Tyr|L|5864	i-tRF-5	normal_1_mismatch	Mt_tRNA	L	sense	Tyr	within gene boundary	5864	5878	5826	5891
AGTAAGGTCAGCTAAATAAGCTATCGGGCCCCTA	13.6923	4.74906	0.952178	4.98758	6.11417e-07	7.50514e-05	hsa|mt-sRNA|Met|H|4402|tRF-5|34|31A2	hsa|mt-sRNA|Met|H|4402	tRF-5	normal_1_mismatch	Mt_tRNA	H	sense	Met	within gene boundary	4402	4435	4402	4469	31A2
AGTAAGGTCAGCTAAATAAGCTATCGGGCCCG	18.7164	3.39384	1.37115	2.47518	0.0133171	0.0788627	hsa|mt-sRNA|Met|H|4402|tRF-5|32|31A0	hsa|mt-sRNA|Met|H|4402	tRF-5	normal_1_mismatch	Mt_tRNA	H	sense	Met	within gene boundary	4402	4433	4402	4469	31A0
AGTAAGGTCAGCTAAATAAGCTATCGGGCCTA	30.199	-1.83549	0.747414	-2.45579	0.0140577	0.0814043	hsa|mt-sRNA|Met|H|4402|tRF-5|32|30C1	hsa|mt-sRNA|Met|H|4402	tRF-5	normal_1_mismatch	Mt_tRNA	H	sense	Met	within gene boundary	4402	4433	4402	4469	30C1
AGTAAGGTCAGCTAAATAAGCTATCGGGCCTATACCCCGAAAATGTTGGT	8.4492	3.42991	1.17388	2.92185	0.00347959	0.0331743	hsa|mt-sRNA|Met|H|4402|tRF-5|50|30C19	hsa|mt-sRNA|Met|H|4402	tRF-5	normal_1_mismatch	Mt_tRNA	H	sense	Met	within gene boundary	4402	4451	4402	4469	30C19
AGTAAGGTCAGCTAAATAAGCTATCGGGCCCATACCCCG	16.1398	2.83557	0.949439	2.98657	0.00282122	0.0293168	hsa|mt-sRNA|Met|H|4402|tRF-5|39|	hsa|mt-sRNA|Met|H|4402	tRF-5	normal_1_mismatch	Mt_tRNA	H	sense	Met	within gene boundary	4402	4440	4402	4469
AGTAAGGTCAGCTAAATAAGCTATCGGGCCCATACCCCGA	329.711	4.69993	1.13047	4.15751	3.21735e-05	0.000987323	hsa|mt-sRNA|Met|H|4402|tRF-5|40|	hsa|mt-sRNA|Met|H|4402	tRF-5	normal_1_mismatch	Mt_tRNA	H	sense	Met	within gene boundary	4402	4441	4402	4469
AGTAAGGTCAGCTAAATAAGCTATCGGGCCCATACCCCGAA	46.6811	5.24478	1.73632	3.02063	0.00252249	0.0276769	hsa|mt-sRNA|Met|H|4402|tRF-5|41|	hsa|mt-sRNA|Met|H|4402	tRF-5	normal_1_mismatch	Mt_tRNA	H	sense	Met	within gene boundary	4402	4442	4402	4469
AGTAAGGTCAGCTAAATAAGCTATCGGGCCCATACCCCGAAAATGT	309.333	3.62043	1.22751	2.94942	0.00318373	0.0315262	hsa|mt-sRNA|Met|H|4402|tRF-5|46|	hsa|mt-sRNA|Met|H|4402	tRF-5	normal_1_mismatch	Mt_tRNA	H	sense	Met	within gene boundary	4402	4447	4402	4469
AGTAAGGTCAGCTAAATAAGCTATCGGGCCCATACCCCGAAAATGTA	18.7836	4.53345	1.0899	4.15951	3.18929e-05	0.000987323	hsa|mt-sRNA|Met|H|4402|tRF-5|47|46T0	hsa|mt-sRNA|Met|H|4402	tRF-5	normal_1_mismatch	Mt_tRNA	H	sense	Met	within gene boundary	4402	4448	4402	4469	46T0
AGTAAGGTCAGCTAAATAAGCTATCGGGCCCATACCCCGAAAATGTTGGC	17.6452	4.75791	1.33156	3.57319	0.000352663	0.00699627	hsa|mt-sRNA|Met|H|4402|tRF-5|50|49T0	hsa|mt-sRNA|Met|H|4402	tRF-5	normal_1_mismatch	Mt_tRNA	H	sense	Met	within gene boundary	4402	4451	4402	4469	49T0
AGTAAGGTCAGCTAAATAAGCTATCGGGCCCC	77.8902	4.85262	0.87107	5.57087	2.53464e-08	8.29673e-06	hsa|mt-sRNA|Met|H|4402|tRF-5|32|31A0	hsa|mt-sRNA|Met|H|4402	tRF-5	normal_1_mismatch	Mt_tRNA	H	sense	Met	within gene boundary	4402	4433	4402	4469	31A0
AGTTAAAGATTAAGAGAACC	10.4179	-1.90543	0.685915	-2.77794	0.00547049	0.0442141	hsa|mt-sRNA|Lys|H|8327|i-tRF-5|20|	hsa|mt-sRNA|Lys|H|8327	i-tRF-5	normal_1_mismatch	Mt_tRNA	H	sense	Lys	within gene boundary	8327	8346	8295	8364
ATAATAGGAGCTTAAACC	3.53199	-2.11902	0.894238	-2.36963	0.0178057	0.0955354	hsa|mt-sRNA|Ile|H|4302|i-tRF-3|18|	hsa|mt-sRNA|Ile|H|4302	i-tRF-3	normal_1_mismatch	Mt_tRNA	H	sense	Ile	within gene boundary	4302	4319	4263	4331
ATAATAGGAGCTTAAACCC	14.4162	-2.21508	0.845713	-2.61919	0.00881389	0.0581826	hsa|mt-sRNA|Ile|H|4302|i-tRF-3|19|	hsa|mt-sRNA|Ile|H|4302	i-tRF-3	normal_1_mismatch	Mt_tRNA	H	sense	Ile	within gene boundary	4302	4320	4263	4331
ATAGGAGCTTAAACCC	79.1822	-3.33423	1.17253	-2.84363	0.00446031	0.0396383	hsa|mt-sRNA|Ile|H|4305|i-tRF-3|16|	hsa|mt-sRNA|Ile|H|4305	i-tRF-3	normal_1_mismatch	Mt_tRNA	H	sense	Ile	within gene boundary	4305	4320	4263	4331
ATAGGCGCTTAAACCC	31.3768	-4.46939	0.994666	-4.49336	7.0107e-06	0.000404971	hsa|mt-sRNA|Ile|H|4305|i-tRF-3|16|5A10	hsa|mt-sRNA|Ile|H|4305	i-tRF-3	normal_1_mismatch	Mt_tRNA	H	sense	Ile	within gene boundary	4305	4320	4263	4331	5A10
ATCCATTGGTCTTAGGCCC	41.1341	-2.04041	0.831958	-2.45254	0.0141852	0.0817004	hsa|mt-sRNA|Leu2|H|12286|i-tRF-5|19|	hsa|mt-sRNA|Leu2|H|12286	i-tRF-5	normal_1_mismatch	Mt_tRNA	H	sense	Leu2	within gene boundary	12286	12304	12266	12336
ATCCATTGGTCTTAGGCCCC	11.9007	-1.62343	0.671226	-2.41861	0.0155799	0.0859522	hsa|mt-sRNA|Leu2|H|12286|i-tRF-5|20|	hsa|mt-sRNA|Leu2|H|12286	i-tRF-5	normal_1_mismatch	Mt_tRNA	H	sense	Leu2	within gene boundary	12286	12305	12266	12336
ATCCATTGGTCTTAGCCCC	101.667	-2.27618	0.727274	-3.12974	0.00174959	0.0209524	hsa|mt-sRNA|Leu2|H|12286|i-tRF-5|19|15G3	hsa|mt-sRNA|Leu2|H|12286	i-tRF-5	normal_1_mismatch	Mt_tRNA	H	sense	Leu2	within gene boundary	12286	12304	12266	12336	15G3
ATCCATTGGTCTTAGCCCCC	148.777	-2.1744	0.76931	-2.82643	0.00470694	0.0408461	hsa|mt-sRNA|Leu2|H|12286|i-tRF-5|20|15G4	hsa|mt-sRNA|Leu2|H|12286	i-tRF-5	normal_1_mismatch	Mt_tRNA	H	sense	Leu2	within gene boundary	12286	12305	12266	12336	15G4
ATGCCCCCATGTCTAACAACATGGCTTTCTCACC	7.42606	-2.03853	0.685623	-2.97325	0.00294661	0.0299852	hsa|mt-sRNA|Ser2|H|12234|tRF-3|34|32A1	hsa|mt-sRNA|Ser2|H|12234	tRF-3	normal_1_mismatch	Mt_tRNA	H	sense	Ser2	within gene boundary	12234	12267	12207	12265	32A1
ATTGTGAATCTGACAA	15.4469	-3.94099	1.38809	-2.83915	0.00452338	0.0397746	hsa|mt-sRNA|His|H|12165|i-tRF-5|16|	hsa|mt-sRNA|His|H|12165	i-tRF-5	normal_1_mismatch	Mt_tRNA	H	sense	His	within gene boundary	12165	12180	12138	12206
ATTGTGAATCTGACAACA	50.8313	-3.31226	1.34198	-2.4682	0.0135794	0.0798503	hsa|mt-sRNA|His|H|12165|i-tRF-5|18|	hsa|mt-sRNA|His|H|12165	i-tRF-5	normal_1_mismatch	Mt_tRNA	H	sense	His	within gene boundary	12165	12182	12138	12206
CAAAGCACCCAACTTACACTTAGGAGATTTCAACTTAACTTGACCGCTCT	11.6597	3.71441	0.945263	3.9295	8.51237e-05	0.00219978	hsa|mt-sRNA|Val|H|1619|tRF-3|50|	hsa|mt-sRNA|Val|H|1619	tRF-3	normal_1_mismatch	Mt_tRNA	H	sense	Val	within gene boundary	1619	1668	1602	1670
CAACGATGGTTTTTCATATCATTGGTCGTGGTTGTAGTCCGTGCGAGAAT	16.2995	3.17971	1.21039	2.62702	0.00861352	0.0579534	hsa|mt-sRNA|Glu|L|14675|tRF-3|50|	hsa|mt-sRNA|Glu|L|14675	tRF-3	normal_1_mismatch	Mt_tRNA	L	sense	Glu	within gene boundary	14675	14724	14674	14742
CAAGAACTGCTAACTCATGCCCCCATGTCTAACAACATGGCTTTCTCACC	22.9435	1.56143	0.567859	2.74967	0.00596547	0.0464928	hsa|mt-sRNA|Ser2|H|12218|tRF-3|50|48A1	hsa|mt-sRNA|Ser2|H|12218	tRF-3	normal_1_mismatch	Mt_tRNA	H	sense	Ser2	within gene boundary	12218	12267	12207	12265	48A1
CAAGAACTGCTAACTCATGCCCCCATGTCTAACA	8.63601	-3.55515	1.2595	-2.82267	0.0047626	0.0408461	hsa|mt-sRNA|Ser2|H|12218|i-tRF-5|34|	hsa|mt-sRNA|Ser2|H|12218	i-tRF-5	normal_1_mismatch	Mt_tRNA	H	sense	Ser2	within gene boundary	12218	12251	12207	12265
CACAAGAACTGCTAACT	7.07954	-1.73032	0.729822	-2.37088	0.017746	0.0955354	hsa|mt-sRNA|Ser2|H|12216|i-tRF-5|17|	hsa|mt-sRNA|Ser2|H|12216	i-tRF-5	normal_1_mismatch	Mt_tRNA	H	sense	Ser2	within gene boundary	12216	12232	12207	12265
CACAAGAACTGCTAACTCATGCCCCCATGTCTAACAACATGGCTTTCTCA	12.9841	2.08956	0.694033	3.01074	0.00260608	0.0280342	hsa|mt-sRNA|Ser2|H|12216|tRF-3|50|	hsa|mt-sRNA|Ser2|H|12216	tRF-3	normal_1_mismatch	Mt_tRNA	H	sense	Ser2	within gene boundary	12216	12265	12207	12265
CACTGTAACGCTAACTTAGCATTAACCTTTTAAGTTAAAGATTAAGAGAA	4.58896	2.81122	1.05438	2.66622	0.00767089	0.0550734	hsa|mt-sRNA|Lys|H|8295|tRF-5|50|8A41	hsa|mt-sRNA|Lys|H|8295	tRF-5	normal_1_mismatch	Mt_tRNA	H	sense	Lys	within gene boundary	8295	8344	8295	8364	8A41
CACTGTAAAGCTAACTTAGCATTAACCTTTTAAGTTAAAGATTAAG	14.3625	3.09773	0.877289	3.53102	0.000413955	0.00797067	hsa|mt-sRNA|Lys|H|8295|tRF-5|46|	hsa|mt-sRNA|Lys|H|8295	tRF-5	normal_1_mismatch	Mt_tRNA	H	sense	Lys	within gene boundary	8295	8340	8295	8364
CACTGTAAAGCTAACTTAGCATTAACCTTTTAAGTTAAAGATTAAGA	34.6476	3.1056	0.66174	4.69308	2.69117e-06	0.000229802	hsa|mt-sRNA|Lys|H|8295|tRF-5|47|	hsa|mt-sRNA|Lys|H|8295	tRF-5	normal_1_mismatch	Mt_tRNA	H	sense	Lys	within gene boundary	8295	8341	8295	8364
CACTGTAATGCTAACTTAGCATTAACCTTTTAAGTTAAAGATTAAG	16.8358	3.4514	0.824837	4.18434	2.85995e-05	0.000984939	hsa|mt-sRNA|Lys|H|8295|tRF-5|46|8A37	hsa|mt-sRNA|Lys|H|8295	tRF-5	normal_1_mismatch	Mt_tRNA	H	sense	Lys	within gene boundary	8295	8340	8295	8364	8A37
CACTGTAATGCTAACTTAGCATTAACCTTTTAAGTTAAAGATTAAGA	23.1476	3.56261	0.637405	5.58924	2.28065e-08	8.29673e-06	hsa|mt-sRNA|Lys|H|8295|tRF-5|47|8A38	hsa|mt-sRNA|Lys|H|8295	tRF-5	normal_1_mismatch	Mt_tRNA	H	sense	Lys	within gene boundary	8295	8341	8295	8364	8A38
CACTGTAATGCTAACTTAGCATTAACCTTTTAAGTTAAAGATTAAGAGAA	144.031	2.40905	0.857822	2.80834	0.0049798	0.0417962	hsa|mt-sRNA|Lys|H|8295|tRF-5|50|8A41	hsa|mt-sRNA|Lys|H|8295	tRF-5	normal_1_mismatch	Mt_tRNA	H	sense	Lys	within gene boundary	8295	8344	8295	8364	8A41
CACTGTAAGGCTAACTTAGCATTAACCTTTTAAGTTAAAGATTAAG	29.9754	2.41212	0.767126	3.14436	0.0016645	0.0200557	hsa|mt-sRNA|Lys|H|8295|tRF-5|46|8A37	hsa|mt-sRNA|Lys|H|8295	tRF-5	normal_1_mismatch	Mt_tRNA	H	sense	Lys	within gene boundary	8295	8340	8295	8364	8A37
CACTGTAAGGCTAACTTAGCATTAACCTTTTAAGTTAAAGATTAAGA	50.2485	2.82316	0.543816	5.19139	2.08731e-07	3.41623e-05	hsa|mt-sRNA|Lys|H|8295|tRF-5|47|8A38	hsa|mt-sRNA|Lys|H|8295	tRF-5	normal_1_mismatch	Mt_tRNA	H	sense	Lys	within gene boundary	8295	8341	8295	8364	8A38
CACTGTAAGGCTAACTTAGCATTAACCTTTTAAGTTAAAGATTAAGAGAA	323.279	2.28748	0.858085	2.6658	0.0076805	0.0550734	hsa|mt-sRNA|Lys|H|8295|tRF-5|50|8A41	hsa|mt-sRNA|Lys|H|8295	tRF-5	normal_1_mismatch	Mt_tRNA	H	sense	Lys	within gene boundary	8295	8344	8295	8364	8A41
CAGAGTGTAGCTTAACACAAAGCACCCAACTTACACTTAGGAGATTTCAA	88.165	3.17215	0.502793	6.30906	2.80744e-10	1.83794e-07	hsa|mt-sRNA|Val|H|1602|tRF-5|50|	hsa|mt-sRNA|Val|H|1602	tRF-5	normal_1_mismatch	Mt_tRNA	H	sense	Val	within gene boundary	1602	1651	1602	1670
CAGAGTGTGGCTTAACACAAAGCACCCAACTTACACTTAGGAGATTTCAA	39.3517	3.65377	0.633093	5.7713	7.86609e-09	3.86225e-06	hsa|mt-sRNA|Val|H|1602|tRF-5|50|8A41	hsa|mt-sRNA|Val|H|1602	tRF-5	normal_1_mismatch	Mt_tRNA	H	sense	Val	within gene boundary	1602	1651	1602	1670	8A41
CAGAGTGTTGCTTAACACAAAGCACCCAACTTACA	12.7147	2.3896	0.754854	3.16565	0.00154736	0.0192663	hsa|mt-sRNA|Val|H|1602|tRH-5|35|8A26	hsa|mt-sRNA|Val|H|1602	tRNA-half-5	normal_1_mismatch	Mt_tRNA	H	sense	Val	within gene boundary	1602	1636	1602	1670	8A26
CAGAGTGTTGCTTAACACAAAGCACCCAACTTACACTTAGGAGATTTCAA	244.54	3.36714	0.459508	7.3277	2.34133e-13	4.59837e-10	hsa|mt-sRNA|Val|H|1602|tRF-5|50|8A41	hsa|mt-sRNA|Val|H|1602	tRF-5	normal_1_mismatch	Mt_tRNA	H	sense	Val	within gene boundary	1602	1651	1602	1670	8A41
CAGAGTGTCGCTTAACACAAAGCACCCAACTTACACTTAGGAGATTTCAA	11.8821	3.83163	0.828633	4.62404	3.76337e-06	0.00027375	hsa|mt-sRNA|Val|H|1602|tRF-5|50|8A41	hsa|mt-sRNA|Val|H|1602	tRF-5	normal_1_mismatch	Mt_tRNA	H	sense	Val	within gene boundary	1602	1651	1602	1670	8A41
CAGATTGTGAATCTGAC	53.4511	-3.21334	1.00735	-3.18988	0.00142334	0.0181522	hsa|mt-sRNA|His|H|12162|i-tRF-5|17|	hsa|mt-sRNA|His|H|12162	i-tRF-5	normal_1_mismatch	Mt_tRNA	H	sense	His	within gene boundary	12162	12178	12138	12206
CATCAGATTGTGAATC	21.1267	-2.79982	0.871576	-3.21236	0.0013165	0.0173347	hsa|mt-sRNA|His|H|12159|i-tRF-5|16|	hsa|mt-sRNA|His|H|12159	i-tRF-5	normal_1_mismatch	Mt_tRNA	H	sense	His	within gene boundary	12159	12174	12138	12206
CATTGGTCTTAGCCCC	19.3139	-2.28706	0.839888	-2.72305	0.0064682	0.0488598	hsa|mt-sRNA|Leu2|H|12289|i-tRF-5|16|12G3	hsa|mt-sRNA|Leu2|H|12289	i-tRF-5	normal_1_mismatch	Mt_tRNA	H	sense	Leu2	within gene boundary	12289	12304	12266	12336	12G3
CATTGGTCTTAGCCCCC	32.7135	-2.81988	0.762707	-3.6972	0.00021799	0.00481047	hsa|mt-sRNA|Leu2|H|12289|i-tRF-5|17|12G4	hsa|mt-sRNA|Leu2|H|12289	i-tRF-5	normal_1_mismatch	Mt_tRNA	H	sense	Leu2	within gene boundary	12289	12305	12266	12336	12G4
CCATTGGTCTTAGCCCC	19.4856	-2.91038	0.965788	-3.01347	0.00258277	0.0280342	hsa|mt-sRNA|Leu2|H|12288|i-tRF-5|17|13G3	hsa|mt-sRNA|Leu2|H|12288	i-tRF-5	normal_1_mismatch	Mt_tRNA	H	sense	Leu2	within gene boundary	12288	12304	12266	12336	13G3
CGAATGATTTCGACT	11.0593	-1.9671	0.820123	-2.39855	0.0164603	0.0898002	hsa|mt-sRNA|Arg|H|10426|i-tRF-5|15|	hsa|mt-sRNA|Arg|H|10426	i-tRF-5	normal_1_mismatch	Mt_tRNA	H	sense	Arg	within gene boundary	10426	10440	10405	10469
CGGTAATCGCATAAAACTTAAAACTTTACAGTCAGAGGTTCATTTCCTCT	19.9623	4.79456	1.59166	3.01231	0.00259272	0.0280342	hsa|mt-sRNA|Leu|H|3247|i-tRF-5|50|42A7	hsa|mt-sRNA|Leu|H|3247	i-tRF-5	normal_1_mismatch	Mt_tRNA	H	sense	Leu	within gene boundary	3247	3296	3230	3304	42A7
CTCACAAGAACTGCTAACTCATGCCCCCATGTCTAACAACATGGCTTTCT	11.9181	3.6699	1.07706	3.40735	0.000655979	0.0109182	hsa|mt-sRNA|Ser2|H|12214|tRF-3|50|	hsa|mt-sRNA|Ser2|H|12214	tRF-3	normal_1_mismatch	Mt_tRNA	H	sense	Ser2	within gene boundary	12214	12263	12207	12265
CTTTTAAGTTAAAGATTAAGAGAACC	47.3378	-2.23702	0.744471	-3.00484	0.00265721	0.0282095	hsa|mt-sRNA|Lys|H|8321|i-tRF-5|26|	hsa|mt-sRNA|Lys|H|8321	i-tRF-5	normal_1_mismatch	Mt_tRNA	H	sense	Lys	within gene boundary	8321	8346	8295	8364
CTTTTAAGTTAAAGATTAAGAGAACCAACACC	16.4887	-3.29965	0.847878	-3.89166	9.95611e-05	0.00253945	hsa|mt-sRNA|Lys|H|8321|i-tRF-5|32|	hsa|mt-sRNA|Lys|H|8321	i-tRF-5	normal_1_mismatch	Mt_tRNA	H	sense	Lys	within gene boundary	8321	8352	8295	8364
CTTTTCAGTTAAAGATTAAGAGAACC	15.8203	-2.82564	0.752623	-3.75439	0.000173766	0.00401503	hsa|mt-sRNA|Lys|H|8321|i-tRF-5|26|5A20	hsa|mt-sRNA|Lys|H|8321	i-tRF-5	normal_1_mismatch	Mt_tRNA	H	sense	Lys	within gene boundary	8321	8346	8295	8364	5A20
GAAAAAGTCATGGAG	13.9215	-2.57902	0.98732	-2.61214	0.00899782	0.0589058	hsa|mt-sRNA|Ser1|L|7500|tRF-5|15|	hsa|mt-sRNA|Ser1|L|7500	tRF-5	normal_1_mismatch	Mt_tRNA	L	sense	Ser1	within gene boundary	7500	7514	7446	7514
GAAAATGTTTAGACGGGCT	35.9514	-1.87593	0.750804	-2.49857	0.0124696	0.0752351	hsa|mt-sRNA|Phe|H|611|i-tRF-5|19|	hsa|mt-sRNA|Phe|H|611	i-tRF-5	normal_1_mismatch	Mt_tRNA	H	sense	Phe	within gene boundary	611	629	577	647
GAAAATGTTTAGACGGGCTC	252.291	-2.73284	1.02331	-2.67059	0.00757179	0.0548745	hsa|mt-sRNA|Phe|H|611|i-tRF-5|20|	hsa|mt-sRNA|Phe|H|611	i-tRF-5	normal_1_mismatch	Mt_tRNA	H	sense	Phe	within gene boundary	611	630	577	647
GAAATACAACGATGGTTTTTCATATCATTGGTCGTGGTTGTAGTCCGTGC	79.2041	4.90228	1.24622	3.93372	8.3642e-05	0.0021903	hsa|mt-sRNA|Glu|L|14681|i-tRF-3|50|	hsa|mt-sRNA|Glu|L|14681	i-tRF-3	normal_1_mismatch	Mt_tRNA	L	sense	Glu	within gene boundary	14681	14730	14674	14742
GAATGATTTCGACTCA	8.30746	-1.76838	0.717377	-2.46507	0.0136987	0.0800721	hsa|mt-sRNA|Arg|H|10427|i-tRF-5|16|	hsa|mt-sRNA|Arg|H|10427	i-tRF-5	normal_1_mismatch	Mt_tRNA	H	sense	Arg	within gene boundary	10427	10442	10405	10469
GACTATGAGAATCGAACCCATCCCTGAGAATCCAAAATTCTCCGTGCCAC	28.516	5.32769	1.04321	5.10702	3.27275e-07	4.94436e-05	hsa|mt-sRNA|Gln|H|as4333|i-tRF-5|50|	hsa|mt-sRNA|Gln|H|as4333	i-tRF-5	normal_1_mismatch	Mt_tRNA	H	anti-sense	Gln	within gene boundary	4333	4382	4329	4400
GACTATGAGAATCGAACCCATCCCTGAGAATCCAAAATTCTCCGTGCCAT	29.6678	4.84652	1.39903	3.4642	0.000531801	0.00955581	hsa|mt-sRNA|Gln|H|as4333|i-tRF-5|50|49C0	hsa|mt-sRNA|Gln|H|as4333	i-tRF-5	normal_1_mismatch	Mt_tRNA	H	anti-sense	Gln	within gene boundary	4333	4382	4329	4400	49C0
GAGAAAGCTCACAAGAACTG	1038.71	-1.61291	0.535845	-3.01004	0.00261215	0.0280342	hsa|mt-sRNA|Ser2|H|12207|tRF-5|20|	hsa|mt-sRNA|Ser2|H|12207	tRF-5	normal_1_mismatch	Mt_tRNA	H	sense	Ser2	within gene boundary	12207	12226	12207	12265
GAGAACGCTCACAAGAACTGCTAACTC	169.374	-1.82051	0.736863	-2.47063	0.0134877	0.079549	hsa|mt-sRNA|Ser2|H|12207|tRF-5|27|5A21	hsa|mt-sRNA|Ser2|H|12207	tRF-5	normal_1_mismatch	Mt_tRNA	H	sense	Ser2	within gene boundary	12207	12233	12207	12265	5A21
GAGAACGCTCACAAGAACTGCTAACTCATGCCCCCATGTCTAACAACATG	162.228	3.22027	1.34348	2.39696	0.0165317	0.0899396	hsa|mt-sRNA|Ser2|H|12207|tRF-5|50|5A44	hsa|mt-sRNA|Ser2|H|12207	tRF-5	normal_1_mismatch	Mt_tRNA	H	sense	Ser2	within gene boundary	12207	12256	12207	12265	5A44
GAGAAAGCTCACAAGAACTGCTAACTCATGCCCCCATGTCTAACAACATG	714.01	4.292	1.32275	3.24476	0.00117551	0.0160327	hsa|mt-sRNA|Ser2|H|12207|tRF-5|50|	hsa|mt-sRNA|Ser2|H|12207	tRF-5	normal_1_mismatch	Mt_tRNA	H	sense	Ser2	within gene boundary	12207	12256	12207	12265
GAGAACGCTCACAAGAACTG	396.683	-2.35607	0.504026	-4.67451	2.94651e-06	0.000231478	hsa|mt-sRNA|Ser2|H|12207|tRF-5|20|5A14	hsa|mt-sRNA|Ser2|H|12207	tRF-5	normal_1_mismatch	Mt_tRNA	H	sense	Ser2	within gene boundary	12207	12226	12207	12265	5A14
GATAACAGCTATCCATTGGTC	28.5798	-2.66788	0.969693	-2.75126	0.00593657	0.0464519	hsa|mt-sRNA|Leu2|H|12276|i-tRF-5|21|	hsa|mt-sRNA|Leu2|H|12276	i-tRF-5	normal_1_mismatch	Mt_tRNA	H	sense	Leu2	within gene boundary	12276	12296	12266	12336
GCACCCAACTTACACTTAGGAGATTTCAACTTAACTTGACCGCTCTGACC	17.1353	3.35138	1.12137	2.98865	0.00280215	0.0292735	hsa|mt-sRNA|Val|H|1623|tRF-3|50|48G1	hsa|mt-sRNA|Val|H|1623	tRF-3	normal_1_mismatch	Mt_tRNA	H	sense	Val	within gene boundary	1623	1672	1602	1670	48G1
GCCCCCATGTCTAACAACATGGCTTTCTCACC	54.7951	-3.52098	1.05233	-3.3459	0.000820159	0.0129903	hsa|mt-sRNA|Ser2|H|12236|tRF-3|32|30A1	hsa|mt-sRNA|Ser2|H|12236	tRF-3	normal_1_mismatch	Mt_tRNA	H	sense	Ser2	within gene boundary	12236	12267	12207	12265	30A1
GCTATCCATTGGTCT	16.6856	-1.76128	0.72299	-2.43611	0.0148462	0.0841087	hsa|mt-sRNA|Leu2|H|12283|i-tRF-5|15|	hsa|mt-sRNA|Leu2|H|12283	i-tRF-5	normal_1_mismatch	Mt_tRNA	H	sense	Leu2	within gene boundary	12283	12297	12266	12336
GCTCACAAGAACTGCTAACTCATGCCCCCATGTCTAACAACATGGCTTTC	12.4201	3.294	1.0093	3.26366	0.00109983	0.0154533	hsa|mt-sRNA|Ser2|H|12213|tRF-3|50|	hsa|mt-sRNA|Ser2|H|12213	tRF-3	normal_1_mismatch	Mt_tRNA	H	sense	Ser2	within gene boundary	12213	12262	12207	12265
GGACTATGAGAATCGAACCCATCCCTGAGA	9.31745	3.19983	1.01523	3.15183	0.00162249	0.0198371	hsa|mt-sRNA|Gln|H|as4332|tRF-5|30|	hsa|mt-sRNA|Gln|H|as4332	tRF-5	normal_1_mismatch	Mt_tRNA	H	anti-sense	Gln	within gene boundary	4332	4361	4329	4400
GGACTATGAGAATCGAACCCATCCCTGAGAATCCAAAATTCTCC	10.9158	5.12186	1.52593	3.35654	0.000789248	0.0127056	hsa|mt-sRNA|Gln|H|as4332|tRF-5|44|	hsa|mt-sRNA|Gln|H|as4332	tRF-5	normal_1_mismatch	Mt_tRNA	H	anti-sense	Gln	within gene boundary	4332	4375	4329	4400
GGACTATGAGAATCGAACCCATCCCTGAGAATCCAAAATTCTCCA	6.10058	3.1278	1.12148	2.78899	0.00528729	0.0430881	hsa|mt-sRNA|Gln|H|as4332|tRF-5|45|44G0	hsa|mt-sRNA|Gln|H|as4332	tRF-5	normal_1_mismatch	Mt_tRNA	H	anti-sense	Gln	within gene boundary	4332	4376	4329	4400	44G0
GGACTATGAGAATCGAACCCATCCCTGAGAATCCAAAATTCTCCGA	19.2733	3.78718	0.872758	4.33932	1.42922e-05	0.000610216	hsa|mt-sRNA|Gln|H|as4332|tRF-5|46|45T0	hsa|mt-sRNA|Gln|H|as4332	tRF-5	normal_1_mismatch	Mt_tRNA	H	anti-sense	Gln	within gene boundary	4332	4377	4329	4400	45T0
GGACTATGAGAATCGAACCCATCCCTGAGAATCCAAAATTCTCCGT	18.5971	3.32701	1.14944	2.89447	0.00379796	0.0350197	hsa|mt-sRNA|Gln|H|as4332|tRF-5|46|	hsa|mt-sRNA|Gln|H|as4332	tRF-5	normal_1_mismatch	Mt_tRNA	H	anti-sense	Gln	within gene boundary	4332	4377	4329	4400
GGACTATGAGAATCGAACCCATCCCTGAGAATCCAAAATTCTCCGTA	27.9266	2.78923	0.842658	3.31004	0.000932832	0.0137751	hsa|mt-sRNA|Gln|H|as4332|tRF-5|47|46G0	hsa|mt-sRNA|Gln|H|as4332	tRF-5	normal_1_mismatch	Mt_tRNA	H	anti-sense	Gln	within gene boundary	4332	4378	4329	4400	46G0
GGACTATGAGAATCGAACCCATCCCTGAGAATCCAAAATTCTCCGTGCCA	246.754	4.3812	0.817797	5.35732	8.44663e-08	2.36988e-05	hsa|mt-sRNA|Gln|H|as4332|tRF-5|50|	hsa|mt-sRNA|Gln|H|as4332	tRF-5	normal_1_mismatch	Mt_tRNA	H	anti-sense	Gln	within gene boundary	4332	4381	4329	4400
GGACTATGAGAATCGAACCCATCCCTGAGAATCCAAAATTCTCCGTGCCT	53.5108	3.99265	1.28339	3.11103	0.00186437	0.0219258	hsa|mt-sRNA|Gln|H|as4332|tRF-5|50|49A0	hsa|mt-sRNA|Gln|H|as4332	tRF-5	normal_1_mismatch	Mt_tRNA	H	anti-sense	Gln	within gene boundary	4332	4381	4329	4400	49A0
GGACTATGAGAATCGAACCCATCCCTGAGCATCCAAAATTCTCCGTGCCA	16.0776	7.50567	1.85721	4.04137	5.31402e-05	0.00146996	hsa|mt-sRNA|Gln|H|as4332|tRF-5|50|29A20	hsa|mt-sRNA|Gln|H|as4332	tRF-5	normal_1_mismatch	Mt_tRNA	H	anti-sense	Gln	within gene boundary	4332	4381	4329	4400	29A20
GGACTCTGAGAATCGAACCCATCCCTGAGAATCCAAAATTCTCCGTG	15.2018	4.06955	1.45838	2.79046	0.00526326	0.043071	hsa|mt-sRNA|Gln|H|as4332|tRF-5|47|5A41	hsa|mt-sRNA|Gln|H|as4332	tRF-5	normal_1_mismatch	Mt_tRNA	H	anti-sense	Gln	within gene boundary	4332	4378	4329	4400	5A41
GGACTCTGAGAATCGAACCCATCCCTGAGAATCCAAAATTCTCCGTGCCA	57.6778	3.91447	0.900206	4.34841	1.37129e-05	0.000610216	hsa|mt-sRNA|Gln|H|as4332|tRF-5|50|5A44	hsa|mt-sRNA|Gln|H|as4332	tRF-5	normal_1_mismatch	Mt_tRNA	H	anti-sense	Gln	within gene boundary	4332	4381	4329	4400	5A44
GGTAAAATGGCTGAGTGAAGCATTGGACTGTAAATCTAAAGACAGGGGTT	27.6392	5.19593	1.22454	4.24317	2.20385e-05	0.000883339	hsa|mt-sRNA|Tyr|L|5842|tRF-5|50|	hsa|mt-sRNA|Tyr|L|5842	tRF-5	normal_1_mismatch	Mt_tRNA	L	sense	Tyr	within gene boundary	5842	5891	5826	5891
GGTAAAATGGCTGAGTGAAGCATTGGACTGTC	73.7639	1.55325	0.644183	2.4112	0.0159002	0.0874736	hsa|mt-sRNA|Tyr|L|5860|tRF-5|32|0T31	hsa|mt-sRNA|Tyr|L|5860	tRF-5	normal_1_mismatch	Mt_tRNA	L	sense	Tyr	within gene boundary	5860	5891	5826	5891	0T31
GGTAACATGGCTGAGTGAAGCATTGGACTGTA	662.336	-1.52719	0.532569	-2.8676	0.00413601	0.0374337	hsa|mt-sRNA|Tyr|L|5860|tRF-5|32|26T5	hsa|mt-sRNA|Tyr|L|5860	tRF-5	normal_1_mismatch	Mt_tRNA	L	sense	Tyr	within gene boundary	5860	5891	5826	5891	26T5
GGTTTTTCATATCATTGGTC	18.5925	-1.92633	0.712849	-2.7023	0.00688619	0.0512291	hsa|mt-sRNA|Glu|L|14698|i-tRF-3|20|	hsa|mt-sRNA|Glu|L|14698	i-tRF-3	normal_1_mismatch	Mt_tRNA	L	sense	Glu	within gene boundary	14698	14717	14674	14742
GTCAGCTAAATAAGCTATCGGGCC	8.11196	-2.71043	1.02286	-2.64986	0.00805254	0.0562079	hsa|mt-sRNA|Met|H|4408|i-tRF-5|24|	hsa|mt-sRNA|Met|H|4408	i-tRF-5	normal_1_mismatch	Mt_tRNA	H	sense	Met	within gene boundary	4408	4431	4402	4469
GTCCTTGTCGTATAAAC	28.0201	2.30624	0.866785	2.66068	0.00779827	0.0554921	hsa|mt-sRNA|Thr|H|15888|tRF-5|17|8A8	hsa|mt-sRNA|Thr|H|15888	tRF-5	normal_1_mismatch	Mt_tRNA	H	sense	Thr	within gene boundary	15888	15904	15888	15953	8A8
GTCCTTGTCGTATAAACT	12.4709	2.07947	0.851283	2.44275	0.0145759	0.0837048	hsa|mt-sRNA|Thr|H|15888|tRF-5|18|8A9	hsa|mt-sRNA|Thr|H|15888	tRF-5	normal_1_mismatch	Mt_tRNA	H	sense	Thr	within gene boundary	15888	15905	15888	15953	8A9
GTCCTTGTGGTATAAACT	184.665	1.66509	0.633067	2.63019	0.0085336	0.0579534	hsa|mt-sRNA|Thr|H|15888|tRF-5|18|8A9	hsa|mt-sRNA|Thr|H|15888	tRF-5	normal_1_mismatch	Mt_tRNA	H	sense	Thr	within gene boundary	15888	15905	15888	15953	8A9
GTGAAGCATTGGACTGTA	6.14487	-2.16515	0.827173	-2.61753	0.00885695	0.0581826	hsa|mt-sRNA|Tyr|L|5860|i-tRF-5|18|	hsa|mt-sRNA|Tyr|L|5860	i-tRF-5	normal_1_mismatch	Mt_tRNA	L	sense	Tyr	within gene boundary	5860	5877	5826	5891
GTTAAGATAGCAGAGCCCGGTAATCGCATAAAACTTA	22.7411	3.43106	0.723782	4.74046	2.13237e-06	0.000192801	hsa|mt-sRNA|Leu|H|3230|tRH-5|37|8G28	hsa|mt-sRNA|Leu|H|3230	tRNA-half-5	normal_1_mismatch	Mt_tRNA	H	sense	Leu	within gene boundary	3230	3266	3230	3304	8G28
GTTAAGATAGCAGAGCCCGGTAATCGCATAAAACTTAAAACTT	8.75702	1.51894	0.631361	2.40582	0.0161363	0.0882778	hsa|mt-sRNA|Leu|H|3230|tRF-5|43|8G34	hsa|mt-sRNA|Leu|H|3230	tRF-5	normal_1_mismatch	Mt_tRNA	H	sense	Leu	within gene boundary	3230	3272	3230	3304	8G34
GTTAAGATCGCAGAGCCCGGTAATCGCATAAAACTTA	28.2365	2.84699	0.5879	4.84265	1.2812e-06	0.000132436	hsa|mt-sRNA|Leu|H|3230|tRH-5|37|8G28	hsa|mt-sRNA|Leu|H|3230	tRNA-half-5	normal_1_mismatch	Mt_tRNA	H	sense	Leu	within gene boundary	3230	3266	3230	3304	8G28
GTTAAGATGGCAGAGCCCGG	35.2944	1.71599	0.604359	2.83936	0.00452044	0.0397746	hsa|mt-sRNA|Leu|H|3230|tRF-5|20|	hsa|mt-sRNA|Leu|H|3230	tRF-5	normal_1_mismatch	Mt_tRNA	H	sense	Leu	within gene boundary	3230	3249	3230	3304
GTTAAGATGGCAGAGCCCGGT	34.6848	2.33825	0.651974	3.58641	0.000335256	0.00685877	hsa|mt-sRNA|Leu|H|3230|tRF-5|21|	hsa|mt-sRNA|Leu|H|3230	tRF-5	normal_1_mismatch	Mt_tRNA	H	sense	Leu	within gene boundary	3230	3250	3230	3304
GTTAAGATGGCAGAGCCCGGTA	47.0203	3.57151	0.745809	4.78877	1.67809e-06	0.000164788	hsa|mt-sRNA|Leu|H|3230|tRF-5|22|	hsa|mt-sRNA|Leu|H|3230	tRF-5	normal_1_mismatch	Mt_tRNA	H	sense	Leu	within gene boundary	3230	3251	3230	3304
GTTAAGATGGCAGAGCCCGGTAA	14.1857	3.49438	0.837109	4.17434	2.98854e-05	0.000984939	hsa|mt-sRNA|Leu|H|3230|tRF-5|23|	hsa|mt-sRNA|Leu|H|3230	tRF-5	normal_1_mismatch	Mt_tRNA	H	sense	Leu	within gene boundary	3230	3252	3230	3304
GTTAAGATGGCAGAGCCCGGTAAT	7.51507	2.24159	0.679225	3.30021	0.000966112	0.01416	hsa|mt-sRNA|Leu|H|3230|tRF-5|24|	hsa|mt-sRNA|Leu|H|3230	tRF-5	normal_1_mismatch	Mt_tRNA	H	sense	Leu	within gene boundary	3230	3253	3230	3304
GTTAAGATGGCAGAGCCCGGTAATC	12.6038	1.71327	0.675622	2.53584	0.0112178	0.0695006	hsa|mt-sRNA|Leu|H|3230|tRF-5|25|	hsa|mt-sRNA|Leu|H|3230	tRF-5	normal_1_mismatch	Mt_tRNA	H	sense	Leu	within gene boundary	3230	3254	3230	3304
GTTAAGATGGCAGAGCCCGGTAATCGCATA	159.335	1.20511	0.430116	2.80182	0.00508148	0.0422883	hsa|mt-sRNA|Leu|H|3230|tRF-5|30|	hsa|mt-sRNA|Leu|H|3230	tRF-5	normal_1_mismatch	Mt_tRNA	H	sense	Leu	within gene boundary	3230	3259	3230	3304
GTTAAGATGGCAGAGCCCGGTAATCGCATAAAA	22.8106	1.64514	0.55039	2.98904	0.00279857	0.0292735	hsa|mt-sRNA|Leu|H|3230|tRF-5|33|	hsa|mt-sRNA|Leu|H|3230	tRF-5	normal_1_mismatch	Mt_tRNA	H	sense	Leu	within gene boundary	3230	3262	3230	3304
GTTAAGATGGCAGAGCCCGGTAATCGCATAAAACTTA	400.793	3.05417	0.582673	5.24164	1.59153e-07	3.12576e-05	hsa|mt-sRNA|Leu|H|3230|tRH-5|37|	hsa|mt-sRNA|Leu|H|3230	tRNA-half-5	normal_1_mismatch	Mt_tRNA	H	sense	Leu	within gene boundary	3230	3266	3230	3304
GTTAAGATTGCAGAGCCCGGTAATCGCATAAAACTTA	46.8112	3.59536	0.718223	5.00591	5.55982e-07	7.50514e-05	hsa|mt-sRNA|Leu|H|3230|tRH-5|37|8G28	hsa|mt-sRNA|Leu|H|3230	tRNA-half-5	normal_1_mismatch	Mt_tRNA	H	sense	Leu	within gene boundary	3230	3266	3230	3304	8G28
GTTAAGATTGCAGAGCCCGGTAATCGCATAAAACTTAAAACTT	18.7015	1.77001	0.623633	2.83823	0.00453641	0.0397746	hsa|mt-sRNA|Leu|H|3230|tRF-5|43|8G34	hsa|mt-sRNA|Leu|H|3230	tRF-5	normal_1_mismatch	Mt_tRNA	H	sense	Leu	within gene boundary	3230	3272	3230	3304	8G34
GTTAAGATGGCAGAGCCCGGTAATCGCATAAAACTTAAA	14.4048	1.98434	0.774198	2.56309	0.0103745	0.0661545	hsa|mt-sRNA|Leu|H|3230|tRF-5|39|	hsa|mt-sRNA|Leu|H|3230	tRF-5	normal_1_mismatch	Mt_tRNA	H	sense	Leu	within gene boundary	3230	3268	3230	3304
GTTAAGATGGCAGAGCCCGGTAATCGCATAAAACTTAAAA	22.25	2.43104	0.728196	3.33844	0.000842502	0.0131016	hsa|mt-sRNA|Leu|H|3230|tRF-5|40|	hsa|mt-sRNA|Leu|H|3230	tRF-5	normal_1_mismatch	Mt_tRNA	H	sense	Leu	within gene boundary	3230	3269	3230	3304
GTTAAGATGGCAGAGCCCGGTAATCGCATAAAACTTAAAACT	286.524	1.04566	0.389127	2.68721	0.00720521	0.0528024	hsa|mt-sRNA|Leu|H|3230|tRF-5|42|	hsa|mt-sRNA|Leu|H|3230	tRF-5	normal_1_mismatch	Mt_tRNA	H	sense	Leu	within gene boundary	3230	3271	3230	3304
GTTAAGATGGCAGAGCCCGGTAATCGCATAAAACTTAAAACTA	46.6266	2.73661	1.05229	2.60064	0.00930501	0.0601153	hsa|mt-sRNA|Leu|H|3230|tRF-5|43|42T0	hsa|mt-sRNA|Leu|H|3230	tRF-5	normal_1_mismatch	Mt_tRNA	H	sense	Leu	within gene boundary	3230	3272	3230	3304	42T0
GTTAAGATGGCAGAGCCCGGTAATCGCATAAAACTTAAAACTT	146.297	1.27116	0.457364	2.77932	0.00544734	0.044209	hsa|mt-sRNA|Leu|H|3230|tRF-5|43|	hsa|mt-sRNA|Leu|H|3230	tRF-5	normal_1_mismatch	Mt_tRNA	H	sense	Leu	within gene boundary	3230	3272	3230	3304
GTTAAGATGGCAGAGCCCGGTAATCGCATAAAACTTAAAACTTT	33.2436	1.86504	0.571533	3.26322	0.00110156	0.0154533	hsa|mt-sRNA|Leu|H|3230|tRF-5|44|	hsa|mt-sRNA|Leu|H|3230	tRF-5	normal_1_mismatch	Mt_tRNA	H	sense	Leu	within gene boundary	3230	3273	3230	3304
GTTAAGATGGCAGAGCCCGGTAATCGCATAAAACTTAAAACTTTA	26.8015	3.23598	0.894996	3.61564	0.000299611	0.00625996	hsa|mt-sRNA|Leu|H|3230|tRF-5|45|	hsa|mt-sRNA|Leu|H|3230	tRF-5	normal_1_mismatch	Mt_tRNA	H	sense	Leu	within gene boundary	3230	3274	3230	3304
GTTAAGATGGCAGAGCCCGGTAATCGCATAAAACTTAAAACTTTAC	6.79107	2.98477	0.922146	3.23676	0.00120893	0.0163747	hsa|mt-sRNA|Leu|H|3230|tRF-5|46|	hsa|mt-sRNA|Leu|H|3230	tRF-5	normal_1_mismatch	Mt_tRNA	H	sense	Leu	within gene boundary	3230	3275	3230	3304
GTTAAGATGGCAGAGCCCGGTAATCGCATAAAACTTAAAACTTTACA	10.0892	3.22425	0.768632	4.19479	2.7313e-05	0.000984939	hsa|mt-sRNA|Leu|H|3230|tRF-5|47|	hsa|mt-sRNA|Leu|H|3230	tRF-5	normal_1_mismatch	Mt_tRNA	H	sense	Leu	within gene boundary	3230	3276	3230	3304
GTTAAGATGGCAGAGCCCGGTAATCGCATAAAACTTAAAACTTTACAGTC	41.9148	4.89611	1.19623	4.09296	4.25896e-05	0.00121226	hsa|mt-sRNA|Leu|H|3230|tRF-5|50|	hsa|mt-sRNA|Leu|H|3230	tRF-5	normal_1_mismatch	Mt_tRNA	H	sense	Leu	within gene boundary	3230	3279	3230	3304
GTTAAGATGGCAGAGCCCGGTAATCGCATAAACCTTA	30.2719	2.9551	0.678984	4.35224	1.34755e-05	0.000610216	hsa|mt-sRNA|Leu|H|3230|tRH-5|37|32A4	hsa|mt-sRNA|Leu|H|3230	tRNA-half-5	normal_1_mismatch	Mt_tRNA	H	sense	Leu	within gene boundary	3230	3266	3230	3304	32A4
GTTAAGATGGCAGAGCCCGGTAATCGCATAAACCTTAAAACT	18.4797	1.54087	0.578998	2.66127	0.00778471	0.0554921	hsa|mt-sRNA|Leu|H|3230|tRF-5|42|32A9	hsa|mt-sRNA|Leu|H|3230	tRF-5	normal_1_mismatch	Mt_tRNA	H	sense	Leu	within gene boundary	3230	3271	3230	3304	32A9
GTTCTTGTAGTTGAAATACAACAATGGTTTTTCATATCATTGGTCGTGGT	16.8064	5.64757	1.52962	3.69214	0.000222374	0.00485269	hsa|mt-sRNA|Glu|L|14693|tRF-5|50|27C22	hsa|mt-sRNA|Glu|L|14693	tRF-5	normal_1_mismatch	Mt_tRNA	L	sense	Glu	within gene boundary	14693	14742	14674	14742	27C22
GTTCTTGTAGTTGAAATACAACGATGGTTTTTCATATCATTGGTCGTCGT	24.3607	3.48636	1.27909	2.72566	0.00641733	0.0486627	hsa|mt-sRNA|Glu|L|14693|tRF-5|50|2C47	hsa|mt-sRNA|Glu|L|14693	tRF-5	normal_1_mismatch	Mt_tRNA	L	sense	Glu	within gene boundary	14693	14742	14674	14742	2C47
GTTCTTGTAGTTGAAATACAACGATGGTTTTTCATATCATTGGTCGTGGT	691.174	5.2857	1.22402	4.3183	1.57238e-05	0.000657054	hsa|mt-sRNA|Glu|L|14693|tRF-5|50|	hsa|mt-sRNA|Glu|L|14693	tRF-5	normal_1_mismatch	Mt_tRNA	L	sense	Glu	within gene boundary	14693	14742	14674	14742
GTTCTTGTCGTTGAAATACAACGATGGTTTTTCATATCATTGGTCGTGGT	135.789	6.31743	1.37979	4.57854	4.68236e-06	0.000317109	hsa|mt-sRNA|Glu|L|14693|tRF-5|50|41T8	hsa|mt-sRNA|Glu|L|14693	tRF-5	normal_1_mismatch	Mt_tRNA	L	sense	Glu	within gene boundary	14693	14742	14674	14742	41T8
GTTCTTGTTGTTGAAATACAACGATGGTTTTTCATATCATTGGTCG	24.1148	5.00251	1.54122	3.24581	0.00117115	0.0160327	hsa|mt-sRNA|Glu|L|14697|tRF-5|46|37T8	hsa|mt-sRNA|Glu|L|14697	tRF-5	normal_1_mismatch	Mt_tRNA	L	sense	Glu	within gene boundary	14697	14742	14674	14742	37T8
GTTCTTGTTGTTGAAATACAACGATGGTTTTTCATATCATTGGTCGTGGT	6658.7	5.7764	1.29602	4.45702	8.31062e-06	0.000441137	hsa|mt-sRNA|Glu|L|14693|tRF-5|50|41T8	hsa|mt-sRNA|Glu|L|14693	tRF-5	normal_1_mismatch	Mt_tRNA	L	sense	Glu	within gene boundary	14693	14742	14674	14742	41T8
GTTGTATTTCAACTACAAGAACACA	26.2549	3.83219	1.52205	2.51777	0.01181	0.0724838	hsa|mt-sRNA|Glu|H|as14721|tRF-3|25|24C0	hsa|mt-sRNA|Glu|H|as14721	tRF-3	normal_1_mismatch	Mt_tRNA	H	anti-sense	Glu	within gene boundary	14721	14745	14674	14742	24C0
GTTCTTGTGGTTGAAATACAACGATGGTTTTTCATATCATTGGTCGTGGT	1440.16	6.11253	1.36533	4.47695	7.57164e-06	0.000424877	hsa|mt-sRNA|Glu|L|14693|tRF-5|50|41T8	hsa|mt-sRNA|Glu|L|14693	tRF-5	normal_1_mismatch	Mt_tRNA	L	sense	Glu	within gene boundary	14693	14742	14674	14742	41T8
GTTTATGTTGCTTACCT	12.5907	3.0025	0.885145	3.3921	0.000693598	0.0114473	hsa|mt-sRNA|Phe|H|577|tRF-5|17|8A8	hsa|mt-sRNA|Phe|H|577	tRF-5	normal_1_mismatch	Mt_tRNA	H	sense	Phe	within gene boundary	577	593	577	647	8A8
GTTTATGTTGCTTACCTC	6.33603	2.58758	0.7854	3.2946	0.000985631	0.0143391	hsa|mt-sRNA|Phe|H|577|tRF-5|18|8A9	hsa|mt-sRNA|Phe|H|577	tRF-5	normal_1_mismatch	Mt_tRNA	H	sense	Phe	within gene boundary	577	594	577	647	8A9
GTTTATGTTGCTTACCTCCTCAAAGCAATACACTG	23.6069	-1.94938	0.643489	-3.02939	0.00245046	0.0273449	hsa|mt-sRNA|Phe|H|577|tRH-5|35|8A26	hsa|mt-sRNA|Phe|H|577	tRNA-half-5	normal_1_mismatch	Mt_tRNA	H	sense	Phe	within gene boundary	577	611	577	647	8A26
GTTTATGTAGCTTACCTCCTCAAAGCAATACACT	27.6654	-1.68995	0.645448	-2.61825	0.00883813	0.0581826	hsa|mt-sRNA|Phe|H|577|tRF-5|34|	hsa|mt-sRNA|Phe|H|577	tRF-5	normal_1_mismatch	Mt_tRNA	H	sense	Phe	within gene boundary	577	610	577	647
GTTTATGTAGCTTACCTCCTCAAAGCAATACACTG	22.6425	-2.72754	0.715422	-3.81249	0.000137573	0.0032166	hsa|mt-sRNA|Phe|H|577|tRH-5|35|	hsa|mt-sRNA|Phe|H|577	tRNA-half-5	normal_1_mismatch	Mt_tRNA	H	sense	Phe	within gene boundary	577	611	577	647
TAACAGCTAAGGACTGCAAAACCCCACTCTGCATCAACTGAACGC	15.8706	2.33635	0.785596	2.97398	0.00293962	0.0299852	hsa|mt-sRNA|Ala|H|as5580|i-tRF-5|45|	hsa|mt-sRNA|Ala|H|as5580	i-tRF-5	normal_1_mismatch	Mt_tRNA	H	anti-sense	Ala	overlap gene boundary	5580	5624	5587	5655
TAAGTTAAAGATTAAGAGAACC	6.39775	-2.71681	0.854568	-3.17916	0.00147704	0.0187156	hsa|mt-sRNA|Lys|H|8325|i-tRF-5|22|	hsa|mt-sRNA|Lys|H|8325	i-tRF-5	normal_1_mismatch	Mt_tRNA	H	sense	Lys	within gene boundary	8325	8346	8295	8364
TAATAGGAGCTTAAACCC	25.1861	-2.27523	0.808335	-2.81471	0.00488211	0.0414621	hsa|mt-sRNA|Ile|H|4303|i-tRF-3|18|	hsa|mt-sRNA|Ile|H|4303	i-tRF-3	normal_1_mismatch	Mt_tRNA	H	sense	Ile	within gene boundary	4303	4320	4263	4331
TAAGCTATCGGGCCCATACCCCGAAA	22.9698	-2.39867	0.85654	-2.80042	0.00510359	0.042293	hsa|mt-sRNA|Met|H|4418|i-tRF-5|26|	hsa|mt-sRNA|Met|H|4418	i-tRF-5	normal_1_mismatch	Mt_tRNA	H	sense	Met	within gene boundary	4418	4443	4402	4469
TAAGCTATCGGGCCCATACCCCGAAAATGTTGGA	37.413	-2.58689	1.06045	-2.43942	0.0147108	0.0839882	hsa|mt-sRNA|Met|H|4418|i-tRF-5|34|33T0	hsa|mt-sRNA|Met|H|4418	i-tRF-5	normal_1_mismatch	Mt_tRNA	H	sense	Met	within gene boundary	4418	4451	4402	4469	33T0
TAGACGGGCTCACATC	27.9748	-2.54194	0.661467	-3.84288	0.000121597	0.00291239	hsa|mt-sRNA|Phe|H|620|i-tRF-3|16|	hsa|mt-sRNA|Phe|H|620	i-tRF-3	normal_1_mismatch	Mt_tRNA	H	sense	Phe	within gene boundary	620	635	577	647
TAGACGGGCTCACATCACC	89.3891	-2.4224	0.757349	-3.19852	0.00138134	0.0177318	hsa|mt-sRNA|Phe|H|620|i-tRF-3|19|	hsa|mt-sRNA|Phe|H|620	i-tRF-3	normal_1_mismatch	Mt_tRNA	H	sense	Phe	within gene boundary	620	638	577	647
TAGATTGAGGCCAGTTGATTAGGGTGCTTAGCTGTTAACTAAGTGTTTGT	20.1032	3.87183	1.1915	3.24954	0.0011559	0.0159872	hsa|mt-sRNA|Asn|L|5680|tRF-5|50|41T8	hsa|mt-sRNA|Asn|L|5680	tRF-5	normal_1_mismatch	Mt_tRNA	L	sense	Asn	within gene boundary	5680	5729	5657	5729	41T8
TAGGAGCTTAAACCC	123.18	-2.24997	0.740748	-3.03743	0.00238607	0.0270402	hsa|mt-sRNA|Ile|H|4306|i-tRF-3|15|	hsa|mt-sRNA|Ile|H|4306	i-tRF-3	normal_1_mismatch	Mt_tRNA	H	sense	Ile	within gene boundary	4306	4320	4263	4331
TAGGATGGGGTGTGATAGGTGGCACGGA	11.9908	-4.00032	1.68189	-2.37847	0.0173847	0.0943193	hsa|mt-sRNA|Gln|L|4373|tRF-5|28|	hsa|mt-sRNA|Gln|L|4373	tRF-5	normal_1_mismatch	Mt_tRNA	L	sense	Gln	within gene boundary	4373	4400	4329	4400
TAGGATGGGGTGTGATAGGTGGCACGGAGCATTTTG	4.63547	4.8444	1.50943	3.20942	0.00133005	0.0173347	hsa|mt-sRNA|Gln|L|4365|tRF-5|36|6T29	hsa|mt-sRNA|Gln|L|4365	tRF-5	normal_1_mismatch	Mt_tRNA	L	sense	Gln	within gene boundary	4365	4400	4329	4400	6T29
TCAAAGTTAAATTATAGGCTAAATCCTATATATA	19.5116	-2.48666	0.929904	-2.6741	0.00749295	0.0545043	hsa|mt-sRNA|Asp|H|7549|tRF-3|34|33C0	hsa|mt-sRNA|Asp|H|7549	tRF-3	normal_1_mismatch	Mt_tRNA	H	sense	Asp	within gene boundary	7549	7582	7518	7585	33C0
TCAAAGTTAAATTATAGGCTAAATCCTATATATCT	24.786	-2.06413	0.786109	-2.62575	0.0086458	0.0579534	hsa|mt-sRNA|Asp|H|7549|tRF-3|35|	hsa|mt-sRNA|Asp|H|7549	tRF-3	normal_1_mismatch	Mt_tRNA	H	sense	Asp	within gene boundary	7549	7583	7518	7585
TCACAAGAACTGCTAACTCATGCCCCCATGTCTAACAACATGGCTTTCTC	14.6527	3.78893	0.852555	4.4442	8.82176e-06	0.000455946	hsa|mt-sRNA|Ser2|H|12215|tRF-3|50|	hsa|mt-sRNA|Ser2|H|12215	tRF-3	normal_1_mismatch	Mt_tRNA	H	sense	Ser2	within gene boundary	12215	12264	12207	12265
TGAATCTGACAACAGAGGCTTACGACC	27.073	2.45475	0.937824	2.6175	0.00885774	0.0581826	hsa|mt-sRNA|His|H|12169|i-tRF-5|27|	hsa|mt-sRNA|His|H|12169	i-tRF-5	normal_1_mismatch	Mt_tRNA	H	sense	His	within gene boundary	12169	12195	12138	12206
TGAATCTGACAACAGAGGCTTACGACCC	63.9134	2.53191	0.863652	2.93163	0.00337189	0.0324627	hsa|mt-sRNA|His|H|12169|i-tRF-5|28|	hsa|mt-sRNA|His|H|12169	i-tRF-5	normal_1_mismatch	Mt_tRNA	H	sense	His	within gene boundary	12169	12196	12138	12206
TGAATCTGACAACAGAGGCTTACGACCCC	142.546	2.78543	0.809459	3.4411	0.000579358	0.0100696	hsa|mt-sRNA|His|H|12169|i-tRF-5|29|	hsa|mt-sRNA|His|H|12169	i-tRF-5	normal_1_mismatch	Mt_tRNA	H	sense	His	within gene boundary	12169	12197	12138	12206
TGAATCTGACAACAGAGGCTTACGACCCCTTATTTACCC	3099.61	3.54607	0.849809	4.17279	3.00898e-05	0.000984939	hsa|mt-sRNA|His|H|12169|tRF-3|39|38G0	hsa|mt-sRNA|His|H|12169	tRF-3	normal_1_mismatch	Mt_tRNA	H	sense	His	within gene boundary	12169	12207	12138	12206	38G0
TGAATCTGACAACAGAGGCTTACGACCCCTTATTTACCCA	297.842	3.00817	0.981998	3.06331	0.002189	0.0251415	hsa|mt-sRNA|His|H|12169|tRF-3|40|38G1	hsa|mt-sRNA|His|H|12169	tRF-3	normal_1_mismatch	Mt_tRNA	H	sense	His	within gene boundary	12169	12208	12138	12206	38G1
TGAATCTGACAACAGAGGCTTACGACCCCTTCTTTACC	49.2243	7.12009	1.36979	5.19793	2.01522e-07	3.41623e-05	hsa|mt-sRNA|His|H|12169|tRF-3|38|31A6	hsa|mt-sRNA|His|H|12169	tRF-3	normal_1_mismatch	Mt_tRNA	H	sense	His	within gene boundary	12169	12206	12138	12206	31A6
TGAATCTGACAACAGAGGCTTACGACCCCTTTTTTACC	13.8407	7.29021	1.61086	4.52566	6.02068e-06	0.000375814	hsa|mt-sRNA|His|H|12169|tRF-3|38|31A6	hsa|mt-sRNA|His|H|12169	tRF-3	normal_1_mismatch	Mt_tRNA	H	sense	His	within gene boundary	12169	12206	12138	12206	31A6
TGAATCTGACAACAGAGGCTTACGACCCCTA	11.4946	3.09178	0.960653	3.21841	0.00128903	0.0172222	hsa|mt-sRNA|His|H|12169|i-tRF-5|31|30T0	hsa|mt-sRNA|His|H|12169	i-tRF-5	normal_1_mismatch	Mt_tRNA	H	sense	His	within gene boundary	12169	12199	12138	12206	30T0
TGAATCTGACAACAGAGGCTTACGACCCCTT	173.792	2.33663	0.748351	3.12237	0.00179399	0.0213539	hsa|mt-sRNA|His|H|12169|i-tRF-5|31|	hsa|mt-sRNA|His|H|12169	i-tRF-5	normal_1_mismatch	Mt_tRNA	H	sense	His	within gene boundary	12169	12199	12138	12206
TGAATCTGACAACAGAGGCTTACGACCCCTTA	101.932	2.11555	0.671354	3.15117	0.00162616	0.0198371	hsa|mt-sRNA|His|H|12169|i-tRF-5|32|	hsa|mt-sRNA|His|H|12169	i-tRF-5	normal_1_mismatch	Mt_tRNA	H	sense	His	within gene boundary	12169	12200	12138	12206
TGAATCTGACAACAGAGGCTTACGACCCCTTAT	20.0117	2.52914	0.951325	2.65855	0.00784784	0.0556432	hsa|mt-sRNA|His|H|12169|i-tRF-5|33|	hsa|mt-sRNA|His|H|12169	i-tRF-5	normal_1_mismatch	Mt_tRNA	H	sense	His	within gene boundary	12169	12201	12138	12206
TGAATCTGACAACAGAGGCTTACGACCCCTTATTTACC	1985.77	3.02969	1.01524	2.9842	0.00284325	0.0293903	hsa|mt-sRNA|His|H|12169|tRF-3|38|	hsa|mt-sRNA|His|H|12169	tRF-3	normal_1_mismatch	Mt_tRNA	H	sense	His	within gene boundary	12169	12206	12138	12206
TGCCCCCATGTCTAACAACATGGCTTTCTCACC	43.4015	-3.0844	0.862849	-3.57466	0.000350677	0.00699627	hsa|mt-sRNA|Ser2|H|12235|tRF-3|33|31A1	hsa|mt-sRNA|Ser2|H|12235	tRF-3	normal_1_mismatch	Mt_tRNA	H	sense	Ser2	within gene boundary	12235	12267	12207	12265	31A1
TTAAAGATTAAGAGAACC	9.54057	-1.5954	0.663107	-2.40594	0.016131	0.0882778	hsa|mt-sRNA|Lys|H|8329|i-tRF-5|18|	hsa|mt-sRNA|Lys|H|8329	i-tRF-5	normal_1_mismatch	Mt_tRNA	H	sense	Lys	within gene boundary	8329	8346	8295	8364
TTAGACGGGCTCACATCACCCCA	3.61642	3.08893	1.17259	2.63429	0.00843143	0.0578997	hsa|mt-sRNA|Phe|H|619|i-tRF-3|23|	hsa|mt-sRNA|Phe|H|619	i-tRF-3	normal_1_mismatch	Mt_tRNA	H	sense	Phe	within gene boundary	619	641	577	647
TTAGACGGGCTCACATCACCCCATAAA	25.1512	3.30807	1.21994	2.71168	0.00669442	0.0501826	hsa|mt-sRNA|Phe|H|619|tRF-3|27|	hsa|mt-sRNA|Phe|H|619	tRF-3	normal_1_mismatch	Mt_tRNA	H	sense	Phe	within gene boundary	619	645	577	647
TTAGACGGGCTCACATCACCCCATAAAC	11.107	3.21373	1.00212	3.20693	0.00134158	0.0173347	hsa|mt-sRNA|Phe|H|619|tRF-3|28|	hsa|mt-sRNA|Phe|H|619	tRF-3	normal_1_mismatch	Mt_tRNA	H	sense	Phe	within gene boundary	619	646	577	647
TTAGACGGGCTCACATCACCCCATAAACA	314.668	4.67654	1.4779	3.16431	0.00155451	0.0192663	hsa|mt-sRNA|Phe|H|619|tRF-3|29|	hsa|mt-sRNA|Phe|H|619	tRF-3	normal_1_mismatch	Mt_tRNA	H	sense	Phe	within gene boundary	619	647	577	647
TTAGACGGGCTCACATCACCCCATAAACAC	21.0693	5.51983	1.68167	3.28234	0.00102948	0.0148529	hsa|mt-sRNA|Phe|H|619|tRF-3|30|29A0	hsa|mt-sRNA|Phe|H|619	tRF-3	normal_1_mismatch	Mt_tRNA	H	sense	Phe	within gene boundary	619	648	577	647	29A0
TTGACCGCTCTGACC	352.587	-2.76659	0.891757	-3.1024	0.00191958	0.0222312	hsa|mt-sRNA|Val|H|1658|tRF-3|15|13G1	hsa|mt-sRNA|Val|H|1658	tRF-3	normal_1_mismatch	Mt_tRNA	H	sense	Val	within gene boundary	1658	1672	1602	1670	13G1
TTTAAGTTAAAGATTAAGAGAACC	32.983	-1.97956	0.737828	-2.68296	0.00729736	0.0532789	hsa|mt-sRNA|Lys|H|8323|i-tRF-5|24|	hsa|mt-sRNA|Lys|H|8323	i-tRF-5	normal_1_mismatch	Mt_tRNA	H	sense	Lys	within gene boundary	8323	8346	8295	8364
TTTAGACGGGCTCACATC	9.10422	-2.06589	0.852934	-2.4221	0.015431	0.0856116	hsa|mt-sRNA|Phe|H|618|i-tRF-3|18|	hsa|mt-sRNA|Phe|H|618	i-tRF-3	normal_1_mismatch	Mt_tRNA	H	sense	Phe	within gene boundary	618	635	577	647
TTTAGACGGGCTCACATCACCCCATAAA	9.02087	2.5168	0.948213	2.65426	0.00794823	0.0560246	hsa|mt-sRNA|Phe|H|618|tRF-3|28|	hsa|mt-sRNA|Phe|H|618	tRF-3	normal_1_mismatch	Mt_tRNA	H	sense	Phe	within gene boundary	618	645	577	647
TTTTACGTTAAAGATTAAGAGAACC	10.4796	-2.1405	0.786512	-2.72151	0.00649845	0.0489002	hsa|mt-sRNA|Lys|H|8322|i-tRF-5|25|5A19	hsa|mt-sRNA|Lys|H|8322	i-tRF-5	normal_1_mismatch	Mt_tRNA	H	sense	Lys	within gene boundary	8322	8346	8295	8364	5A19
TTTTGGTGCAACTCC	6.71905	-1.94511	0.691666	-2.81221	0.00492019	0.0414732	hsa|mt-sRNA|Leu2|H|12311|i-tRF-3|15|	hsa|mt-sRNA|Leu2|H|12311	i-tRF-3	normal_1_mismatch	Mt_tRNA	H	sense	Leu2	within gene boundary	12311	12325	12266	12336
AAAGCTAAAACTCACCTGAGTTGTAAAAAACTC	18.0671	2.58215	0.87685	2.9448	0.00323164	0.0316163	hsa|mt-sRNA|mtSSU rRNA|H|969|i-5p|33|	hsa|mt-sRNA|mtSSU rRNA|H|969	i-5prime	normal_1_mismatch	Mt_rRNA	H	sense	mtSSU rRNA	within gene boundary	969	1001	648	1601
AAAGTATAGGCGATAGAAATTGAAACCT	17.7662	2.17101	0.85331	2.54422	0.0109523	0.0681883	hsa|mt-sRNA|mtLSU rRNA|H|1739|i-5p|28|	hsa|mt-sRNA|mtLSU rRNA|H|1739	i-5prime	normal_1_mismatch	Mt_rRNA	H	sense	mtLSU rRNA	within gene boundary	1739	1766	1671	3229
AACATCTAACTGAACTCCTCACACCCAATTGGACC	55.7364	-4.23708	1.43596	-2.9507	0.0031705	0.0315262	hsa|mt-sRNA|mtLSU rRNA|H|2238|i-5p|35|5A29	hsa|mt-sRNA|mtLSU rRNA|H|2238	i-5prime	normal_1_mismatch	Mt_rRNA	H	sense	mtLSU rRNA	within gene boundary	2238	2272	1671	3229	5A29
AACGGCCGCGGTACCC	32.5198	-2.56629	1.02827	-2.49574	0.0125693	0.0754928	hsa|mt-sRNA|mtLSU rRNA|H|2564|i-3p|16|	hsa|mt-sRNA|mtLSU rRNA|H|2564	i-3prime	normal_1_mismatch	Mt_rRNA	H	sense	mtLSU rRNA	within gene boundary	2564	2579	1671	3229
AACTGAACTCCTCACACCCAATTGGACC	24.271	-3.71298	1.52988	-2.42697	0.0152254	0.0849509	hsa|mt-sRNA|mtLSU rRNA|H|2245|i-5p|28|	hsa|mt-sRNA|mtLSU rRNA|H|2245	i-5prime	normal_1_mismatch	Mt_rRNA	H	sense	mtLSU rRNA	within gene boundary	2245	2272	1671	3229
AAGAACAGGGTTTGTTA	90.3212	2.56994	0.668201	3.84605	0.000120035	0.00291049	hsa|mt-sRNA|mtLSU rRNA|H|3217|i-3p|17|	hsa|mt-sRNA|mtLSU rRNA|H|3217	i-3prime	normal_1_mismatch	Mt_rRNA	H	sense	mtLSU rRNA	within gene boundary	3217	3233	1671	3229
AAGGACATTTAACTAAAACCCCT	10.123	-2.99589	1.18402	-2.53027	0.0113975	0.0703922	hsa|mt-sRNA|mtSSU rRNA|H|1513|i-3p|23|	hsa|mt-sRNA|mtSSU rRNA|H|1513	i-3prime	normal_1_mismatch	Mt_rRNA	H	sense	mtSSU rRNA	within gene boundary	1513	1535	648	1601
AATAAAGCTAAAACTCACCTGAGTTGTAAAAAACTC	23.8638	1.73204	0.710916	2.43635	0.0148363	0.0841087	hsa|mt-sRNA|mtSSU rRNA|H|966|i-5p|36|	hsa|mt-sRNA|mtSSU rRNA|H|966	i-5prime	normal_1_mismatch	Mt_rRNA	H	sense	mtSSU rRNA	within gene boundary	966	1001	648	1601
AATTCCCGGACGTCTAAACC	32.5392	-3.25461	0.976397	-3.33329	0.000858265	0.0131016	hsa|mt-sRNA|COII|H|8107|i-3p|20|	hsa|mt-sRNA|COII|H|8107	i-3prime	normal_1_mismatch	protein_coding	H	sense	COII	within gene boundary	8107	8126	7586	8269
AATTCCCGGACGTCTAAACCA	29.9262	-3.43169	0.748891	-4.58236	4.59759e-06	0.000317109	hsa|mt-sRNA|COII|H|8107|i-3p|21|	hsa|mt-sRNA|COII|H|8107	i-3prime	normal_1_mismatch	protein_coding	H	sense	COII	within gene boundary	8107	8127	7586	8269
AATTCCCGGACGTCTAAACCAAACC	9.48359	-2.68976	0.924529	-2.90933	0.00362201	0.0340365	hsa|mt-sRNA|COII|H|8107|i-3p|25|	hsa|mt-sRNA|COII|H|8107	i-3prime	normal_1_mismatch	protein_coding	H	sense	COII	within gene boundary	8107	8131	7586	8269
ACATACCCATGGCCAACCTCCTACTCCTCATTGTACCCATTCTAATCGCA	8.40308	2.74404	1.0788	2.54361	0.0109712	0.0681883	hsa|mt-sRNA|tRNA-Leu|H|3305|tRF-1|50|	hsa|mt-sRNA|tRNA-Leu|H|3305	tRF-1	normal_1_mismatch	protein_coding	H	sense	tRNA-Leu	overlap gene boundary	3305	3354	3307	4262
ACCCACATAAAGTATAGGCGATAGAAATTGAAACC	20.8725	-3.70419	1.52498	-2.429	0.0151404	0.0849509	hsa|mt-sRNA|mtLSU rRNA|H|1731|i-5p|35|5A29	hsa|mt-sRNA|mtLSU rRNA|H|1731	i-5prime	normal_1_mismatch	Mt_rRNA	H	sense	mtLSU rRNA	within gene boundary	1731	1765	1671	3229	5A29
ACCCACATAAAGTATAGGCGATAGAAATTGAAACCT	104.658	-3.61451	1.35595	-2.66568	0.00768336	0.0550734	hsa|mt-sRNA|mtLSU rRNA|H|1731|i-5p|36|5A30	hsa|mt-sRNA|mtLSU rRNA|H|1731	i-5prime	normal_1_mismatch	Mt_rRNA	H	sense	mtLSU rRNA	within gene boundary	1731	1766	1671	3229	5A30
ACCTCGATGTTGGATCA	32.533	-3.61478	1.42039	-2.54491	0.0109306	0.0681883	hsa|mt-sRNA|mtLSU rRNA|H|2984|i-3p|17|	hsa|mt-sRNA|mtLSU rRNA|H|2984	i-3prime	normal_1_mismatch	Mt_rRNA	H	sense	mtLSU rRNA	within gene boundary	2984	3000	1671	3229
ACGGCCGCGGTACCC	81.0717	-3.39334	1.07827	-3.14702	0.00164945	0.019997	hsa|mt-sRNA|mtLSU rRNA|H|2565|i-3p|15|	hsa|mt-sRNA|mtLSU rRNA|H|2565	i-3prime	normal_1_mismatch	Mt_rRNA	H	sense	mtLSU rRNA	within gene boundary	2565	2579	1671	3229
ACGGCCGCGGTACCCT	21.9578	-2.71037	0.979918	-2.76592	0.00567626	0.0451343	hsa|mt-sRNA|mtLSU rRNA|H|2565|i-3p|16|	hsa|mt-sRNA|mtLSU rRNA|H|2565	i-3prime	normal_1_mismatch	Mt_rRNA	H	sense	mtLSU rRNA	within gene boundary	2565	2580	1671	3229
ACTGGAAAGTGCACTTGGACGAACA	16.1513	2.89413	0.704273	4.10939	3.96711e-05	0.0011629	hsa|mt-sRNA|mtSSU rRNA|H|1578|3p|25|24C0	hsa|mt-sRNA|mtSSU rRNA|H|1578	3prime	normal_1_mismatch	Mt_rRNA	H	sense	mtSSU rRNA	within gene boundary	1578	1602	648	1601	24C0
AGAACAGGGTTTGTTA	13.0891	2.67082	0.916568	2.91394	0.00356902	0.0336998	hsa|mt-sRNA|mtLSU rRNA|H|3218|i-3p|16|	hsa|mt-sRNA|mtLSU rRNA|H|3218	i-3prime	normal_1_mismatch	Mt_rRNA	H	sense	mtLSU rRNA	within gene boundary	3218	3233	1671	3229
AGACAAGTCGTAACATGGTAAGTGTACTGGAAAGTGCACTTGGACGAACA	18.2163	3.01971	0.72145	4.18562	2.84391e-05	0.000984939	hsa|mt-sRNA|mtSSU rRNA|H|1553|3p|50|49C0	hsa|mt-sRNA|mtSSU rRNA|H|1553	3prime	normal_1_mismatch	Mt_rRNA	H	sense	mtSSU rRNA	within gene boundary	1553	1602	648	1601	49C0
AGAGGAGCCTGTTCTGT	14.494	4.49465	1.51934	2.95828	0.00309357	0.0313184	hsa|mt-sRNA|mtSSU rRNA|H|1196|i-3p|17|	hsa|mt-sRNA|mtSSU rRNA|H|1196	i-3prime	normal_1_mismatch	Mt_rRNA	H	sense	mtSSU rRNA	within gene boundary	1196	1212	648	1601
ATAGGCGATAGAAATTGAAACC	25.2743	2.59577	0.980752	2.64671	0.00812783	0.0562079	hsa|mt-sRNA|mtLSU rRNA|H|1744|i-5p|22|	hsa|mt-sRNA|mtLSU rRNA|H|1744	i-5prime	normal_1_mismatch	Mt_rRNA	H	sense	mtLSU rRNA	within gene boundary	1744	1765	1671	3229
ATAGGCGATAGAAATTGAAACCT	1125.18	2.45568	0.894769	2.74448	0.00606069	0.0464968	hsa|mt-sRNA|mtLSU rRNA|H|1744|i-5p|23|	hsa|mt-sRNA|mtLSU rRNA|H|1744	i-5prime	normal_1_mismatch	Mt_rRNA	H	sense	mtLSU rRNA	within gene boundary	1744	1766	1671	3229
ATAGGTTTGGTCCTAGCCTTTCTATTAGCTCTTAGTAAGATTACACATGC	29.9257	3.53287	0.849751	4.15753	3.21705e-05	0.000987323	hsa|mt-sRNA|tRNA-Phe|H|649|tRF-1|50|	hsa|mt-sRNA|tRNA-Phe|H|649	tRF-1	normal_1_mismatch	Mt_rRNA	H	sense	tRNA-Phe	within gene boundary	649	698	648	1601
ATATACCTGAACTCCTCACACCCAATTGGACC	100.822	-4.26045	1.67007	-2.55106	0.0107396	0.0676045	hsa|mt-sRNA|mtLSU rRNA|H|2241|i-5p|32|5A26	hsa|mt-sRNA|mtLSU rRNA|H|2241	i-5prime	normal_1_mismatch	Mt_rRNA	H	sense	mtLSU rRNA	within gene boundary	2241	2272	1671	3229	5A26
ATATCATCTCAACTTAGTATTATACCCACACCCACCCAAGAACAGGGTTT	28.4531	6.09431	0.964646	6.31766	2.6555e-10	1.83794e-07	hsa|mt-sRNA|mtLSU rRNA|H|3180|3p|50|	hsa|mt-sRNA|mtLSU rRNA|H|3180	3prime	normal_1_mismatch	Mt_rRNA	H	sense	mtLSU rRNA	within gene boundary	3180	3229	1671	3229
ATATAACTGAACTCCTCACACCCAATTGGACC	251.737	-3.43571	1.45048	-2.36867	0.0178521	0.0955354	hsa|mt-sRNA|mtLSU rRNA|H|2241|i-5p|32|	hsa|mt-sRNA|mtLSU rRNA|H|2241	i-5prime	normal_1_mismatch	Mt_rRNA	H	sense	mtLSU rRNA	within gene boundary	2241	2272	1671	3229
ATATCTGAACACACAATAGCTAAGACCCAAACTGGGATTAGATACCCCAT	6.99964	2.81519	1.01397	2.77641	0.00549623	0.0442402	hsa|mt-sRNA|mtSSU rRNA|H|1039|i-5p|50|49C0	hsa|mt-sRNA|mtSSU rRNA|H|1039	i-5prime	normal_1_mismatch	Mt_rRNA	H	sense	mtSSU rRNA	within gene boundary	1039	1088	648	1601	49C0
ATGGTAAGTGTACTGGAAAGTGCACTTGGACGAACA	22.8936	2.49043	0.599794	4.15213	3.29389e-05	0.000995263	hsa|mt-sRNA|mtSSU rRNA|H|1567|3p|36|35C0	hsa|mt-sRNA|mtSSU rRNA|H|1567	3prime	normal_1_mismatch	Mt_rRNA	H	sense	mtSSU rRNA	within gene boundary	1567	1602	648	1601	35C0
ATTAATCCCCTGGCCCAACCCGTCATCTACTCTACCATCTTTGCAGGCAC	17.8612	2.20775	0.590335	3.73982	0.000184151	0.00410991	hsa|mt-sRNA|tRNA-Met|H|4470|tRF-1|50|	hsa|mt-sRNA|tRNA-Met|H|4470	tRF-1	normal_1_mismatch	protein_coding	H	sense	tRNA-Met	within gene boundary	4470	4519	4470	5511
ATTATACCCACACCCACCCAAGAACAGGGTTTGTTA	22.5524	3.96764	0.899739	4.40977	1.03481e-05	0.000521121	hsa|mt-sRNA|mtLSU rRNA|H|3198|i-3p|36|	hsa|mt-sRNA|mtLSU rRNA|H|3198	i-3prime	normal_1_mismatch	Mt_rRNA	H	sense	mtLSU rRNA	within gene boundary	3198	3233	1671	3229
ATTCCCGGACGTCTAAACC	16.3792	-2.57775	0.880502	-2.92759	0.00341602	0.0327271	hsa|mt-sRNA|COII|H|8108|i-3p|19|	hsa|mt-sRNA|COII|H|8108	i-3prime	normal_1_mismatch	protein_coding	H	sense	COII	within gene boundary	8108	8126	7586	8269
CAAACCATTTACCCAAATAAAGTATAGGCGATAGAAATTGAAACCT	169.617	2.54945	1.01474	2.51242	0.0119906	0.0731354	hsa|mt-sRNA|mtLSU rRNA|H|1721|i-5p|46|	hsa|mt-sRNA|mtLSU rRNA|H|1721	i-5prime	normal_1_mismatch	Mt_rRNA	H	sense	mtLSU rRNA	within gene boundary	1721	1766	1671	3229
CAAATCAAGTATAGGCGATAGAAATTGAAACC	373.636	-4.91819	1.46673	-3.35318	0.000798901	0.0127564	hsa|mt-sRNA|mtLSU rRNA|H|1734|i-5p|32|5A26	hsa|mt-sRNA|mtLSU rRNA|H|1734	i-5prime	normal_1_mismatch	Mt_rRNA	H	sense	mtLSU rRNA	within gene boundary	1734	1765	1671	3229	5A26
CAAATCAAGTATAGGCGATAGAAATTGAAACCT	214.688	-4.13362	1.22232	-3.38179	0.000720157	0.0117609	hsa|mt-sRNA|mtLSU rRNA|H|1734|i-5p|33|5A27	hsa|mt-sRNA|mtLSU rRNA|H|1734	i-5prime	normal_1_mismatch	Mt_rRNA	H	sense	mtLSU rRNA	within gene boundary	1734	1766	1671	3229	5A27
CAAATCAAGTATAGGCGATAGAAATTGAAACCTGGCGCA	39.9188	-4.20674	1.59139	-2.64344	0.00820676	0.0565547	hsa|mt-sRNA|mtLSU rRNA|H|1734|i-5p|39|5A33	hsa|mt-sRNA|mtLSU rRNA|H|1734	i-5prime	normal_1_mismatch	Mt_rRNA	H	sense	mtLSU rRNA	within gene boundary	1734	1772	1671	3229	5A33
CAAATAAAGTATAGGCGATAGAAATTGAAACC	989.465	-4.01905	1.43985	-2.7913	0.00524973	0.043071	hsa|mt-sRNA|mtLSU rRNA|H|1734|i-5p|32|	hsa|mt-sRNA|mtLSU rRNA|H|1734	i-5prime	normal_1_mismatch	Mt_rRNA	H	sense	mtLSU rRNA	within gene boundary	1734	1765	1671	3229
CAAATAAAGTATAGGCGATAGAAATTGAAACCT	580.376	-3.13559	1.15031	-2.72587	0.00641324	0.0486627	hsa|mt-sRNA|mtLSU rRNA|H|1734|i-5p|33|	hsa|mt-sRNA|mtLSU rRNA|H|1734	i-5prime	normal_1_mismatch	Mt_rRNA	H	sense	mtLSU rRNA	within gene boundary	1734	1766	1671	3229
CAAATAAAGTATAGGCGATAGAAATTGAAACCTGGC	39.1658	-3.59955	1.2225	-2.94441	0.00323568	0.0316163	hsa|mt-sRNA|mtLSU rRNA|H|1734|i-5p|36|	hsa|mt-sRNA|mtLSU rRNA|H|1734	i-5prime	normal_1_mismatch	Mt_rRNA	H	sense	mtLSU rRNA	within gene boundary	1734	1769	1671	3229
CAAATAAAGTATAGGCGATAGAAATTGACACC	64.3375	-6.97659	1.60679	-4.34193	1.41236e-05	0.000610216	hsa|mt-sRNA|mtLSU rRNA|H|1734|i-5p|32|28A3	hsa|mt-sRNA|mtLSU rRNA|H|1734	i-5prime	normal_1_mismatch	Mt_rRNA	H	sense	mtLSU rRNA	within gene boundary	1734	1765	1671	3229	28A3
CAAATAAAGTATAGGCGATAGAAATTGACACCT	38.1463	-5.43204	1.53156	-3.54674	0.000390033	0.00758824	hsa|mt-sRNA|mtLSU rRNA|H|1734|i-5p|33|28A4	hsa|mt-sRNA|mtLSU rRNA|H|1734	i-5prime	normal_1_mismatch	Mt_rRNA	H	sense	mtLSU rRNA	within gene boundary	1734	1766	1671	3229	28A4
CAAGTCGTAACATGGTAAGTGTACTGGAAAGTGCACTTGGACGAACA	25.7124	2.18983	0.814311	2.68918	0.0071627	0.0526874	hsa|mt-sRNA|mtSSU rRNA|H|1556|3p|47|46C0	hsa|mt-sRNA|mtSSU rRNA|H|1556	3prime	normal_1_mismatch	Mt_rRNA	H	sense	mtSSU rRNA	within gene boundary	1556	1602	648	1601	46C0
CAATAAAGCTAAAACTCACCTGAGTTGTAAAAAACTC	36.2888	3.01121	0.635561	4.73788	2.15969e-06	0.000192801	hsa|mt-sRNA|mtSSU rRNA|H|965|i-5p|37|	hsa|mt-sRNA|mtSSU rRNA|H|965	i-5prime	normal_1_mismatch	Mt_rRNA	H	sense	mtSSU rRNA	within gene boundary	965	1001	648	1601
CAAGAACAGGGTTTGTTA	73.5447	3.20471	0.737117	4.34763	1.37617e-05	0.000610216	hsa|mt-sRNA|mtLSU rRNA|H|3216|i-3p|18|	hsa|mt-sRNA|mtLSU rRNA|H|3216	i-3prime	normal_1_mismatch	Mt_rRNA	H	sense	mtLSU rRNA	within gene boundary	3216	3233	1671	3229
CATCATAATCGGAGGCTTTGGCA	19.5694	-3.45119	1.03613	-3.33085	0.0008658	0.0131016	hsa|mt-sRNA|COI|H|6119|i-5p|23|	hsa|mt-sRNA|COI|H|6119	i-5prime	normal_1_mismatch	protein_coding	H	sense	COI	within gene boundary	6119	6141	5904	7445
CATATCACTGAACTCCTCACACCCAATTGGACC	30.3166	-3.90178	1.55663	-2.50655	0.0121916	0.0739021	hsa|mt-sRNA|mtLSU rRNA|H|2240|i-5p|33|5A27	hsa|mt-sRNA|mtLSU rRNA|H|2240	i-5prime	normal_1_mismatch	Mt_rRNA	H	sense	mtLSU rRNA	within gene boundary	2240	2272	1671	3229	5A27
CATTAGGAGGGCTGAGAGGGCCCC	16.0169	2.52628	1.0004	2.52526	0.0115613	0.0711798	hsa|mt-sRNA|COIII|L|as9264|i-3p|24|	hsa|mt-sRNA|COIII|L|as9264	i-3prime	normal_1_mismatch	protein_coding	L	anti-sense	COIII	within gene boundary	9264	9287	9207	9990
CATTAGGAGGGCTGAGAGGGCCCCT	27.2349	4.11083	1.65759	2.48001	0.013138	0.0786677	hsa|mt-sRNA|COIII|L|as9263|i-3p|25|	hsa|mt-sRNA|COIII|L|as9263	i-3prime	normal_1_mismatch	protein_coding	L	anti-sense	COIII	within gene boundary	9263	9287	9207	9990
CATTAGGAGGGCTGAGAGGGCCCCTA	53.4208	2.98718	1.21522	2.45814	0.0139657	0.0813294	hsa|mt-sRNA|COIII|L|as9262|i-3p|26|0C25	hsa|mt-sRNA|COIII|L|as9262	i-3prime	normal_1_mismatch	protein_coding	L	anti-sense	COIII	within gene boundary	9262	9287	9207	9990	0C25
CCAATAAAGCTAAAACTCACCTGAGTTGTAAAAAACTC	13.7669	2.05445	0.662367	3.10167	0.00192429	0.0222312	hsa|mt-sRNA|mtSSU rRNA|H|964|i-5p|38|	hsa|mt-sRNA|mtSSU rRNA|H|964	i-5prime	normal_1_mismatch	Mt_rRNA	H	sense	mtSSU rRNA	within gene boundary	964	1001	648	1601
CCAAATAAAGTATAGGCGATAGAAATTGAAACC	963.091	-4.06789	1.4699	-2.76746	0.00564953	0.0451044	hsa|mt-sRNA|mtLSU rRNA|H|1733|i-5p|33|	hsa|mt-sRNA|mtLSU rRNA|H|1733	i-5prime	normal_1_mismatch	Mt_rRNA	H	sense	mtLSU rRNA	within gene boundary	1733	1765	1671	3229
CCAAATAAAGTATAGGCGATAGAAATTGAAACCT	584.703	-3.24811	1.31248	-2.4748	0.0133312	0.0788627	hsa|mt-sRNA|mtLSU rRNA|H|1733|i-5p|34|	hsa|mt-sRNA|mtLSU rRNA|H|1733	i-5prime	normal_1_mismatch	Mt_rRNA	H	sense	mtLSU rRNA	within gene boundary	1733	1766	1671	3229
CCAAATAAAGTATAGGCGATAGAAATTGCAACC	69.5487	-8.15548	1.90328	-4.28496	1.82769e-05	0.00074783	hsa|mt-sRNA|mtLSU rRNA|H|1733|i-5p|33|28A4	hsa|mt-sRNA|mtLSU rRNA|H|1733	i-5prime	normal_1_mismatch	Mt_rRNA	H	sense	mtLSU rRNA	within gene boundary	1733	1765	1671	3229	28A4
CCAAATAAAGTATAGGCGATAGAAATTGCAACCT	40.669	-6.52039	1.9876	-3.28054	0.00103608	0.0148529	hsa|mt-sRNA|mtLSU rRNA|H|1733|i-5p|34|28A5	hsa|mt-sRNA|mtLSU rRNA|H|1733	i-5prime	normal_1_mismatch	Mt_rRNA	H	sense	mtLSU rRNA	within gene boundary	1733	1766	1671	3229	28A5
CCAAGAACAGGGTTTGTTA	22.1384	2.91468	0.844663	3.45069	0.000559147	0.00980504	hsa|mt-sRNA|mtLSU rRNA|H|3215|i-3p|19|	hsa|mt-sRNA|mtLSU rRNA|H|3215	i-3prime	normal_1_mismatch	Mt_rRNA	H	sense	mtLSU rRNA	within gene boundary	3215	3233	1671	3229
CCCATAGTAGGCCTAAAAGCAGCCACCAATTAAGAAAGCGTTCAAGCTCA	11.5179	2.82646	0.805391	3.50942	0.000449085	0.00856314	hsa|mt-sRNA|mtLSU rRNA|H|2164|i-5p|50|	hsa|mt-sRNA|mtLSU rRNA|H|2164	i-5prime	normal_1_mismatch	Mt_rRNA	H	sense	mtLSU rRNA	within gene boundary	2164	2213	1671	3229
CCCCAATAAAGCTAAAACTCACCTGAGTTGTAAAAAACTC	24.3788	4.41277	0.971276	4.54327	5.53887e-06	0.000362612	hsa|mt-sRNA|mtSSU rRNA|H|962|i-5p|40|	hsa|mt-sRNA|mtSSU rRNA|H|962	i-5prime	normal_1_mismatch	Mt_rRNA	H	sense	mtSSU rRNA	within gene boundary	962	1001	648	1601
CCCAAATAAAGTATAGGCGATAGAAATTGAAACC	643.391	-3.82352	1.4663	-2.60759	0.00911816	0.0594438	hsa|mt-sRNA|mtLSU rRNA|H|1732|i-5p|34|	hsa|mt-sRNA|mtLSU rRNA|H|1732	i-5prime	normal_1_mismatch	Mt_rRNA	H	sense	mtLSU rRNA	within gene boundary	1732	1765	1671	3229
CCCAACTAAAGTATAGGCGATAGAAATTGAAACC	241.303	-4.40151	1.44967	-3.03622	0.00239562	0.0270402	hsa|mt-sRNA|mtLSU rRNA|H|1732|i-5p|34|5A28	hsa|mt-sRNA|mtLSU rRNA|H|1732	i-5prime	normal_1_mismatch	Mt_rRNA	H	sense	mtLSU rRNA	within gene boundary	1732	1765	1671	3229	5A28
CCCAACTAAAGTATAGGCGATAGAAATTGAAACCT	146.794	-4.02111	1.36037	-2.95591	0.00311751	0.031399	hsa|mt-sRNA|mtLSU rRNA|H|1732|i-5p|35|5A29	hsa|mt-sRNA|mtLSU rRNA|H|1732	i-5prime	normal_1_mismatch	Mt_rRNA	H	sense	mtLSU rRNA	within gene boundary	1732	1766	1671	3229	5A29
CCCAACTAAAGTATAGGCGATAGAAATTGAAACCTGGC	51.0969	-3.70997	1.50974	-2.45735	0.0139966	0.0813294	hsa|mt-sRNA|mtLSU rRNA|H|1732|i-5p|38|5A32	hsa|mt-sRNA|mtLSU rRNA|H|1732	i-5prime	normal_1_mismatch	Mt_rRNA	H	sense	mtLSU rRNA	within gene boundary	1732	1769	1671	3229	5A32
CCCAAGAACAGGGTTTGTTA	21.7247	3.10129	0.895683	3.46249	0.000535203	0.00955581	hsa|mt-sRNA|mtLSU rRNA|H|3214|i-3p|20|	hsa|mt-sRNA|mtLSU rRNA|H|3214	i-3prime	normal_1_mismatch	Mt_rRNA	H	sense	mtLSU rRNA	within gene boundary	3214	3233	1671	3229
CGTAACATGGTAAGTGTACTGGAAAGTGCACTTGGACGAACA	53.182	2.11873	0.749976	2.82507	0.00472701	0.0408461	hsa|mt-sRNA|mtSSU rRNA|H|1561|3p|42|41C0	hsa|mt-sRNA|mtSSU rRNA|H|1561	3prime	normal_1_mismatch	Mt_rRNA	H	sense	mtSSU rRNA	within gene boundary	1561	1602	648	1601	41C0
CTCGGAGCAGAACCC	13.0609	-2.35952	0.843509	-2.79727	0.00515365	0.0425285	hsa|mt-sRNA|mtLSU rRNA|H|2822|i-3p|15|	hsa|mt-sRNA|mtLSU rRNA|H|2822	i-3prime	normal_1_mismatch	Mt_rRNA	H	sense	mtLSU rRNA	within gene boundary	2822	2836	1671	3229
CTGCGTCAGATTAAAACA	14.6659	2.25113	0.863576	2.60675	0.00914054	0.0594438	hsa|mt-sRNA|mtLSU rRNA|H|2341|i-5p|18|	hsa|mt-sRNA|mtLSU rRNA|H|2341	i-5prime	normal_1_mismatch	Mt_rRNA	H	sense	mtLSU rRNA	within gene boundary	2341	2358	1671	3229
CTGGAAAGTGCACTTGGACGAACA	14.5611	2.52967	0.653702	3.86976	0.000108944	0.00274316	hsa|mt-sRNA|mtSSU rRNA|H|1579|3p|24|23C0	hsa|mt-sRNA|mtSSU rRNA|H|1579	3prime	normal_1_mismatch	Mt_rRNA	H	sense	mtSSU rRNA	within gene boundary	1579	1602	648	1601	23C0
CTTCACCAGTCAAAGCGAACT	20.2536	3.19855	0.779541	4.10313	4.07607e-05	0.00117726	hsa|mt-sRNA|mtLSU rRNA|H|2862|i-3p|21|	hsa|mt-sRNA|mtLSU rRNA|H|2862	i-3prime	normal_1_mismatch	Mt_rRNA	H	sense	mtLSU rRNA	within gene boundary	2862	2882	1671	3229
CTTCACCAGTCAAAGCGAACTACT	37.063	2.95818	0.875175	3.38011	0.000724578	0.0117609	hsa|mt-sRNA|mtLSU rRNA|H|2862|i-3p|24|	hsa|mt-sRNA|mtLSU rRNA|H|2862	i-3prime	normal_1_mismatch	Mt_rRNA	H	sense	mtLSU rRNA	within gene boundary	2862	2885	1671	3229
CTTCACCAGTCAAAGCGAACTACTA	17.015	2.89347	1.00316	2.88435	0.00392228	0.035997	hsa|mt-sRNA|mtLSU rRNA|H|2862|i-3p|25|	hsa|mt-sRNA|mtLSU rRNA|H|2862	i-3prime	normal_1_mismatch	Mt_rRNA	H	sense	mtLSU rRNA	within gene boundary	2862	2886	1671	3229
GCACTTGGACGAACA	142.223	2.59718	0.574333	4.52209	6.12325e-06	0.000375814	hsa|mt-sRNA|mtSSU rRNA|H|1588|3p|15|14C0	hsa|mt-sRNA|mtSSU rRNA|H|1588	3prime	normal_1_mismatch	Mt_rRNA	H	sense	mtSSU rRNA	within gene boundary	1588	1602	648	1601	14C0
GCAGAACCCAACCTCCGAGCAGTACATGCTAAGACTTCACCAGTCAAAGC	13.0824	5.36906	1.14733	4.67962	2.8741e-06	0.000231478	hsa|mt-sRNA|mtLSU rRNA|H|2828|i-3p|50|	hsa|mt-sRNA|mtLSU rRNA|H|2828	i-3prime	normal_1_mismatch	Mt_rRNA	H	sense	mtLSU rRNA	within gene boundary	2828	2877	1671	3229
GCCAAACCATTTACCCAAATAAAGTATAGGCGATAGAAATTGAAACCTTG	32.7842	4.90893	1.47577	3.32636	0.000879888	0.0131016	hsa|mt-sRNA|mtLSU rRNA|H|1719|i-5p|50|48G1	hsa|mt-sRNA|mtLSU rRNA|H|1719	i-5prime	normal_1_mismatch	Mt_rRNA	H	sense	mtLSU rRNA	within gene boundary	1719	1768	1671	3229	48G1
GCTAAACCTAGCCCCAAACCCACTCCACCTTACTACCAGAA	36.1385	3.44349	0.765029	4.50113	6.75946e-06	0.000402291	hsa|mt-sRNA|tRNA-Val|H|1671|tRF-1|41|40C0	hsa|mt-sRNA|tRNA-Val|H|1671	tRF-1	normal_1_mismatch	Mt_rRNA	H	sense	tRNA-Val	within gene boundary	1671	1711	1671	3229	40C0
GCTAAACCTAGCCCCAAACCCACTCCACCTTACTACCAGAC	23.8388	1.95797	0.764592	2.56081	0.010443	0.0663755	hsa|mt-sRNA|tRNA-Val|H|1671|tRF-1|41|	hsa|mt-sRNA|tRNA-Val|H|1671	tRF-1	normal_1_mismatch	Mt_rRNA	H	sense	tRNA-Val	within gene boundary	1671	1711	1671	3229
GCTAAACCTAGCCCCAAACCCACTCCACCTTCCTACCAGACAACC	16.8486	6.83859	1.30465	5.2417	1.59106e-07	3.12576e-05	hsa|mt-sRNA|tRNA-Val|H|1671|tRF-1|45|31A13	hsa|mt-sRNA|tRNA-Val|H|1671	tRF-1	normal_1_mismatch	Mt_rRNA	H	sense	tRNA-Val	within gene boundary	1671	1715	1671	3229	31A13
GCTAAACCTAGCCCCAAACCCACTCCACCTTACTACCAGACA	38.176	2.81722	0.810222	3.4771	0.000506862	0.00921738	hsa|mt-sRNA|tRNA-Val|H|1671|tRF-1|42|	hsa|mt-sRNA|tRNA-Val|H|1671	tRF-1	normal_1_mismatch	Mt_rRNA	H	sense	tRNA-Val	within gene boundary	1671	1712	1671	3229
GCTAAACCTAGCCCCAAACCCACTCCACCTTACTACCAGACAA	159.012	3.72359	0.804333	4.62941	3.66706e-06	0.00027375	hsa|mt-sRNA|tRNA-Val|H|1671|tRF-1|43|	hsa|mt-sRNA|tRNA-Val|H|1671	tRF-1	normal_1_mismatch	Mt_rRNA	H	sense	tRNA-Val	within gene boundary	1671	1713	1671	3229
GCTAAACCTAGCCCCAAACCCACTCCACCTTACTACCAGACAAC	227.337	2.28244	0.711195	3.2093	0.00133058	0.0173347	hsa|mt-sRNA|tRNA-Val|H|1671|tRF-1|44|	hsa|mt-sRNA|tRNA-Val|H|1671	tRF-1	normal_1_mismatch	Mt_rRNA	H	sense	tRNA-Val	within gene boundary	1671	1714	1671	3229
GCTAAACCTAGCCCCAAACCCACTCCACCTTACTACCAGACAACA	230.574	2.37095	0.808699	2.93181	0.00336993	0.0324627	hsa|mt-sRNA|tRNA-Val|H|1671|tRF-1|45|44C0	hsa|mt-sRNA|tRNA-Val|H|1671	tRF-1	normal_1_mismatch	Mt_rRNA	H	sense	tRNA-Val	within gene boundary	1671	1715	1671	3229	44C0
GCTAAACCTAGCCCCAAACCCACTCCACCTTACTACCAGACAACC	434.304	2.13005	0.697581	3.05348	0.00226203	0.0258292	hsa|mt-sRNA|tRNA-Val|H|1671|tRF-1|45|	hsa|mt-sRNA|tRNA-Val|H|1671	tRF-1	normal_1_mismatch	Mt_rRNA	H	sense	tRNA-Val	within gene boundary	1671	1715	1671	3229
GCTAAACCTAGCCCCAAACCCACTCCACCTTACTACCAGACAACCT	130.647	2.0575	0.617876	3.32996	0.000868589	0.0131016	hsa|mt-sRNA|tRNA-Val|H|1671|tRF-1|46|	hsa|mt-sRNA|tRNA-Val|H|1671	tRF-1	normal_1_mismatch	Mt_rRNA	H	sense	tRNA-Val	within gene boundary	1671	1716	1671	3229
GCTAAACCTAGCCCCAAACCCACTCCACCTTACTACCAGACAACCTA	56.998	2.80672	0.819576	3.4246	0.000615707	0.0105152	hsa|mt-sRNA|tRNA-Val|H|1671|tRF-1|47|46T0	hsa|mt-sRNA|tRNA-Val|H|1671	tRF-1	normal_1_mismatch	Mt_rRNA	H	sense	tRNA-Val	within gene boundary	1671	1717	1671	3229	46T0
GCTAAACCTAGCCCCAAACCCACTCCACCTTACTACCAGACAACCTT	24.7034	3.12741	0.862897	3.62431	0.000289734	0.00611868	hsa|mt-sRNA|tRNA-Val|H|1671|tRF-1|47|	hsa|mt-sRNA|tRNA-Val|H|1671	tRF-1	normal_1_mismatch	Mt_rRNA	H	sense	tRNA-Val	within gene boundary	1671	1717	1671	3229
GCTAAACCTAGCCCCAAACCCACTCCACCTTACTACCAGACAACCTTAGC	33.2968	4.64977	1.33495	3.48311	0.000495622	0.00909722	hsa|mt-sRNA|tRNA-Val|H|1671|tRF-1|50|	hsa|mt-sRNA|tRNA-Val|H|1671	tRF-1	normal_1_mismatch	Mt_rRNA	H	sense	tRNA-Val	within gene boundary	1671	1720	1671	3229
GCTAACCCTAGCCCCAAACCCACTCCACCTTACTACCAGACAA	54.9619	3.11426	0.832065	3.74281	0.000181977	0.00410807	hsa|mt-sRNA|tRNA-Val|H|1671|tRF-1|43|5A37	hsa|mt-sRNA|tRNA-Val|H|1671	tRF-1	normal_1_mismatch	Mt_rRNA	H	sense	tRNA-Val	within gene boundary	1671	1713	1671	3229	5A37
GTAAGTGTACTGGAAAGTGCACTTGGACGAACA	27.4566	3.4672	0.841942	4.1181	3.82011e-05	0.00113677	hsa|mt-sRNA|mtSSU rRNA|H|1570|3p|33|32C0	hsa|mt-sRNA|mtSSU rRNA|H|1570	3prime	normal_1_mismatch	Mt_rRNA	H	sense	mtSSU rRNA	within gene boundary	1570	1602	648	1601	32C0
GTATAGGCGATAGAAATTGAAACCT	18.0851	2.60366	0.883079	2.94839	0.00319435	0.0315262	hsa|mt-sRNA|mtLSU rRNA|H|1742|i-5p|25|	hsa|mt-sRNA|mtLSU rRNA|H|1742	i-5prime	normal_1_mismatch	Mt_rRNA	H	sense	mtLSU rRNA	within gene boundary	1742	1766	1671	3229
GTCATTAGGAGGGCTGAGAGGGCCCCTGTA	18.9508	3.04041	1.15745	2.62681	0.00861893	0.0579534	hsa|mt-sRNA|COIII|L|as9260|i-3p|30|0A29	hsa|mt-sRNA|COIII|L|as9260	i-3prime	normal_1_mismatch	protein_coding	L	anti-sense	COIII	within gene boundary	9260	9289	9207	9990	0A29
TATAACTGAACTCCTCACACCCAATTGGACC	781.57	-3.69321	1.47152	-2.50979	0.0120804	0.0734547	hsa|mt-sRNA|mtLSU rRNA|H|2242|i-5p|31|	hsa|mt-sRNA|mtLSU rRNA|H|2242	i-5prime	normal_1_mismatch	Mt_rRNA	H	sense	mtLSU rRNA	within gene boundary	2242	2272	1671	3229
TATAACTGAACTCCTCACACCCAATTGGCCC	60.1907	-5.75771	1.50922	-3.81502	0.000136171	0.0032166	hsa|mt-sRNA|mtLSU rRNA|H|2242|i-5p|31|28A2	hsa|mt-sRNA|mtLSU rRNA|H|2242	i-5prime	normal_1_mismatch	Mt_rRNA	H	sense	mtLSU rRNA	within gene boundary	2242	2272	1671	3229	28A2
TATTGTTTTTTGTGAATTCTTCGATAATGGCCCATTTGGGCAAA	8.8326	1.65852	0.685706	2.4187	0.0155762	0.0859522	hsa|mt-sRNA|ND2|L|as5249|i-5p|44|	hsa|mt-sRNA|ND2|L|as5249	i-5prime	normal_1_mismatch	protein_coding	L	anti-sense	ND2	within gene boundary	5249	5292	4470	5511
TATTGTTTTTTGTGAATTCTTCGATAATGGCCCATTTGGGCAAAA	10.25	1.78121	0.661429	2.69296	0.00708201	0.0523807	hsa|mt-sRNA|ND2|L|as5248|i-5p|45|	hsa|mt-sRNA|ND2|L|as5248	i-5prime	normal_1_mismatch	protein_coding	L	anti-sense	ND2	within gene boundary	5248	5292	4470	5511
TGCACTTGGACGAACA	32.8008	2.0093	0.626318	3.20812	0.00133607	0.0173347	hsa|mt-sRNA|mtSSU rRNA|H|1587|3p|16|15C0	hsa|mt-sRNA|mtSSU rRNA|H|1587	3prime	normal_1_mismatch	Mt_rRNA	H	sense	mtSSU rRNA	within gene boundary	1587	1602	648	1601	15C0
TTAAAAAAAGTAAAAGGAACTCGGCAAATCT	31.4253	3.09956	0.860291	3.60293	0.000314654	0.00650505	hsa|mt-sRNA|mtLSU rRNA|H|2455|i-3p|31|	hsa|mt-sRNA|mtLSU rRNA|H|2455	i-3prime	normal_1_mismatch	Mt_rRNA	H	sense	mtLSU rRNA	within gene boundary	2455	2485	1671	3229
TTATACCCACACCCACCCAAGAACAGGGTTTGTTA	13.6907	3.48817	0.835892	4.17299	3.00632e-05	0.000984939	hsa|mt-sRNA|mtLSU rRNA|H|3199|i-3p|35|	hsa|mt-sRNA|mtLSU rRNA|H|3199	i-3prime	normal_1_mismatch	Mt_rRNA	H	sense	mtLSU rRNA	within gene boundary	3199	3233	1671	3229
AAAGATAAAATTTGAAATCTGGTTAGGCTGGTGTTAGGGTTCTTTGTTTT	22.8334	4.65864	1.16682	3.9926	6.53527e-05	0.00178268	hsa|mt-sRNA|non-coding|L|as358|nc|50|	hsa|mt-sRNA|non-coding|L|as358	non-coding	normal_1_mismatch	non-coding	L	anti-sense	non-coding	falls in non-coding region	358	407	na	na
AAATTAGAATCTTAGCTTTGGGTGCTAATGGTGGAGTTAAAGACTTTTTC	12.0022	3.69805	1.13325	3.26323	0.00110151	0.0154533	hsa|mt-sRNA|non-coding|L|as15961|nc|50|	hsa|mt-sRNA|non-coding|L|as15961	non-coding	normal_1_mismatch	non-coding	L	anti-sense	non-coding	falls in non-coding region	15961	16010	na	na
AATTAGAATCTTAGCTTTGGGTGCTAATGGTGGAGTTAAAGACTTTTTCT	15.0657	4.33911	1.12382	3.86104	0.000112904	0.00280687	hsa|mt-sRNA|non-coding|L|as15960|nc|50|	hsa|mt-sRNA|non-coding|L|as15960	non-coding	normal_1_mismatch	non-coding	L	anti-sense	non-coding	falls in non-coding region	15960	16009	na	na
AGAATCTTAGCTTTGGGTGCTAATGGTGGAGTTAAAGACTTTTTCTCTGA	35.8196	1.8935	0.569278	3.32615	0.000880557	0.0131016	hsa|mt-sRNA|non-coding|L|as15956|nc|50|	hsa|mt-sRNA|non-coding|L|as15956	non-coding	normal_1_mismatch	non-coding	L	anti-sense	non-coding	falls in non-coding region	15956	16005	na	na
AGAATCTTAGCTTTGGTTGCTAATGGTGGAGTTAAAGACTTTTTCTCTGA	12.9675	2.14882	0.817808	2.62753	0.0086007	0.0579534	hsa|mt-sRNA|non-coding|L|as15956|nc|50|33C16	hsa|mt-sRNA|non-coding|L|as15956	non-coding	normal_1_mismatch	non-coding	L	anti-sense	non-coding	falls in non-coding region	15956	16005	na	na	33C16
CAGAGCATAGTTTAAATTAGAATC	26.9524	-2.4668	0.93121	-2.64903	0.00807232	0.0562079	hsa|mt-sRNA|non-coding|L|as16000|nc|24|18T5	hsa|mt-sRNA|non-coding|L|as16000	non-coding	normal_1_mismatch	non-coding	L	anti-sense	non-coding	falls in non-coding region	16000	16023	na	na	18T5
CTCCCGCCTTTTTTCCC	18.9221	-2.42703	0.806881	-3.00792	0.00263042	0.0280769	hsa|mt-sRNA|non-coding|L|as5744|nc|17|	hsa|mt-sRNA|non-coding|L|as5744	non-coding	normal_1_mismatch	non-coding	L	anti-sense	non-coding	falls in non-coding region	5744	5760	na	na
TAGAATCTTAGCTTTGGGTGCTAATGGTGGAGTTAAAGACTTTTTCTCTG	11.0091	2.09904	0.77962	2.69238	0.00709434	0.0523807	hsa|mt-sRNA|non-coding|L|as15957|nc|50|	hsa|mt-sRNA|non-coding|L|as15957	non-coding	normal_1_mismatch	non-coding	L	anti-sense	non-coding	falls in non-coding region	15957	16006	na	na
TTTTTTCCCGGCGGC	53.8006	-2.07759	0.882947	-2.35302	0.0186214	0.0991125	hsa|mt-sRNA|non-coding|L|as5738|nc|15|	hsa|mt-sRNA|non-coding|L|as5738	non-coding	normal_1_mismatch	non-coding	L	anti-sense	non-coding	falls in non-coding region	5738	5752	na	na
AACTTACACTTAGGAGATTTCAACTTAACTTGACCGCTCTGACCA	131.624	1.75612	0.601355	2.92027	0.00349724	0.0331815	hsa|mt-sRNA|Val|H|1629|tRF-5|45|CCA	hsa|mt-sRNA|Val|H|1629-CCA	tRF-5	CCA_0_mismatch	Mt_tRNA	H	sense	Val	within gene boundary	1629	1670	1602	1670	CCA
AACTTGACCGCTCTGACCA	211.08	-1.72105	0.673376	-2.55585	0.0105929	0.0668956	hsa|mt-sRNA|Val|H|1655|tRF-5|19|CCA	hsa|mt-sRNA|Val|H|1655-CCA	tRF-5	CCA_0_mismatch	Mt_tRNA	H	sense	Val	within gene boundary	1655	1670	1602	1670	CCA
AAGAACTGCTAACTCATGCCCCCATGTCTAACAACATGGCTTTCTCACCA	8.57642	1.94832	0.751321	2.5932	0.00950885	0.0612307	hsa|mt-sRNA|Ser2|H|12219|tRF-5|50|CCA	hsa|mt-sRNA|Ser2|H|12219-CCA	tRF-5	CCA_0_mismatch	Mt_tRNA	H	sense	Ser2	within gene boundary	12219	12265	12207	12265	CCA
ACTTACACTTAGGAGATTTCAACTTAACTTGACCGCTCTGACCA	45.6439	1.5259	0.482372	3.16333	0.00155974	0.0192663	hsa|mt-sRNA|Val|H|1630|tRF-5|44|CCA	hsa|mt-sRNA|Val|H|1630-CCA	tRF-5	CCA_0_mismatch	Mt_tRNA	H	sense	Val	within gene boundary	1630	1670	1602	1670	CCA
AGTAAGGTCAGCTAAATAAGCTATCGGGCCCCCA	25.1915	3.43975	0.872543	3.94222	8.07317e-05	0.00214266	hsa|mt-sRNA|Met|H|4402|tRF-3|34|CCA	hsa|mt-sRNA|Met|H|4402-CCA	tRF-3	CCA_0_mismatch	Mt_tRNA	H	sense	Met	within gene boundary	4402	4432	4402	4469	CCA
AGATTGTGAATCTGACAACAGAGGCTTACGACCCCTTATTTACCCCA	15.8337	1.91632	0.812771	2.35777	0.0183853	0.0981216	hsa|mt-sRNA|His|H|12163|tRF-5|47|CCA	hsa|mt-sRNA|His|H|12163-CCA	tRF-5	CCA_0_mismatch	Mt_tRNA	H	sense	His	within gene boundary	12163	12206	12138	12206	CCA
ATCATTGGTCGTGGTTGTAGTCCGTGCGAGAATACCA	59.7643	-1.47449	0.560419	-2.63104	0.0085123	0.0579534	hsa|mt-sRNA|Glu|L|14674|tRH-3|37|CCA	hsa|mt-sRNA|Glu|L|14674-CCA	tRNA-half-3	CCA_0_mismatch	Mt_tRNA	L	sense	Glu	within gene boundary	14674	14707	14674	14742	CCA
CAATACTTAATTTCTGCCA	8.80031	1.52019	0.624757	2.43325	0.0149639	0.0842096	hsa|mt-sRNA|Trp|H|5564|tRF-5|19|CCA	hsa|mt-sRNA|Trp|H|5564-CCA	tRF-5	CCA_0_mismatch	Mt_tRNA	H	sense	Trp	within gene boundary	5564	5579	5512	5579	CCA
ATTGGTCGTGGTTGTAGTCCGTGCGAGAATACCA	1411.58	-1.55879	0.54965	-2.83596	0.00456882	0.0398807	hsa|mt-sRNA|Glu|L|14674|tRH-3|34|CCA	hsa|mt-sRNA|Glu|L|14674-CCA	tRNA-half-3	CCA_0_mismatch	Mt_tRNA	L	sense	Glu	within gene boundary	14674	14704	14674	14742	CCA
CACCCAACTTACACTTAGGAGATTTCAACTTAACTTGACCGCTCTGACCA	26.3592	3.32733	0.670152	4.96504	6.86881e-07	7.9355e-05	hsa|mt-sRNA|Val|H|1624|tRF-5|50|CCA	hsa|mt-sRNA|Val|H|1624-CCA	tRF-5	CCA_0_mismatch	Mt_tRNA	H	sense	Val	within gene boundary	1624	1670	1602	1670	CCA
CAGTAAGTTGCAATACTTAATTTCTGCCA	51.45	1.96134	0.739064	2.65382	0.00795869	0.0560246	hsa|mt-sRNA|Trp|H|5554|tRF-5|29|CCA	hsa|mt-sRNA|Trp|H|5554-CCA	tRF-5	CCA_0_mismatch	Mt_tRNA	H	sense	Trp	within gene boundary	5554	5579	5512	5579	CCA
CATATCATTGGTCGTGGTTGTAGTCCGTGCGAGAATACCA	30.9435	-1.32873	0.541256	-2.4549	0.0140924	0.0814043	hsa|mt-sRNA|Glu|L|14674|tRF-3|40|CCA	hsa|mt-sRNA|Glu|L|14674-CCA	tRF-3	CCA_0_mismatch	Mt_tRNA	L	sense	Glu	within gene boundary	14674	14710	14674	14742	CCA
CATGGCTTTCTCACCA	9.46933	-2.13599	0.837935	-2.54911	0.0107999	0.0677668	hsa|mt-sRNA|Ser2|H|12253|tRF-5|16|CCA	hsa|mt-sRNA|Ser2|H|12253-CCA	tRF-5	CCA_0_mismatch	Mt_tRNA	H	sense	Ser2	within gene boundary	12253	12265	12207	12265	CCA
CCTTTTTCCAAGGACACCA	8.62409	2.5651	0.985761	2.60215	0.00926406	0.0600482	hsa|mt-sRNA|Thr|H|15938|tRF-5|19|CCA	hsa|mt-sRNA|Thr|H|15938-CCA	tRF-5	CCA_0_mismatch	Mt_tRNA	H	sense	Thr	within gene boundary	15938	15953	15888	15953	CCA
CGGAGATGAAAACCTTTTTCCAAGGACACCA	43.9942	1.52093	0.64156	2.37067	0.0177558	0.0955354	hsa|mt-sRNA|Thr|H|15926|tRF-5|31|CCA	hsa|mt-sRNA|Thr|H|15926-CCA	tRF-5	CCA_0_mismatch	Mt_tRNA	H	sense	Thr	within gene boundary	15926	15953	15888	15953	CCA
CTCAGTAAGTTGCAATACTTAATTTCTGCCA	432.506	1.80024	0.700521	2.56987	0.0101738	0.0652985	hsa|mt-sRNA|Trp|H|5552|tRF-5|31|CCA	hsa|mt-sRNA|Trp|H|5552-CCA	tRF-5	CCA_0_mismatch	Mt_tRNA	H	sense	Trp	within gene boundary	5552	5579	5512	5579	CCA
GGTTTTTCATATCATTGGTCGTGGTTGTAGTCCGTGCGAGAATACCA	21.4258	2.62746	0.894929	2.93595	0.00332532	0.0323314	hsa|mt-sRNA|Glu|L|14674|tRF-3|47|CCA	hsa|mt-sRNA|Glu|L|14674-CCA	tRF-3	CCA_0_mismatch	Mt_tRNA	L	sense	Glu	within gene boundary	14674	14717	14674	14742	CCA
GTTAGGCCTCTTTTTACCACCA	4.44992	-3.43546	1.06291	-3.23214	0.00122868	0.0165283	hsa|mt-sRNA|Tyr|L|5826|tRF-3|22|CCA	hsa|mt-sRNA|Tyr|L|5826-CCA	tRF-3	CCA_0_mismatch	Mt_tRNA	L	sense	Tyr	within gene boundary	5826	5844	5826	5891	CCA
TATCATTGGTCGTGGTTGTAGTCCGTGCGAGAATACCA	292.551	-1.61268	0.573158	-2.81368	0.00489776	0.0414621	hsa|mt-sRNA|Glu|L|14674|tRF-3|38|CCA	hsa|mt-sRNA|Glu|L|14674-CCA	tRF-3	CCA_0_mismatch	Mt_tRNA	L	sense	Glu	within gene boundary	14674	14708	14674	14742	CCA
TGACCGCTCTGACCA	332.326	-2.40993	0.573674	-4.20088	2.65883e-05	0.000984939	hsa|mt-sRNA|Val|H|1659|tRF-5|15|CCA	hsa|mt-sRNA|Val|H|1659-CCA	tRF-5	CCA_0_mismatch	Mt_tRNA	H	sense	Val	within gene boundary	1659	1670	1602	1670	CCA
TGGTCGTGGTTGTAGTCCGTGCGAGAATACCA	229.345	-1.30927	0.511612	-2.55911	0.010494	0.0664846	hsa|mt-sRNA|Glu|L|14674|tRH-3|32|CCA	hsa|mt-sRNA|Glu|L|14674-CCA	tRNA-half-3	CCA_0_mismatch	Mt_tRNA	L	sense	Glu	within gene boundary	14674	14702	14674	14742	CCA
TGCAATACTTAATTTCTGCCA	62.3306	1.74008	0.718259	2.42264	0.0154084	0.0856116	hsa|mt-sRNA|Trp|H|5562|tRF-5|21|CCA	hsa|mt-sRNA|Trp|H|5562-CCA	tRF-5	CCA_0_mismatch	Mt_tRNA	H	sense	Trp	within gene boundary	5562	5579	5512	5579	CCA
TGCCCCCATGTCTAACAACATGGCTTTCTCACCA	8.30185	-2.15861	0.743678	-2.90262	0.00370059	0.0344453	hsa|mt-sRNA|Ser2|H|12235|tRF-5|34|CCA	hsa|mt-sRNA|Ser2|H|12235-CCA	tRF-5	CCA_0_mismatch	Mt_tRNA	H	sense	Ser2	within gene boundary	12235	12265	12207	12265	CCA
TTAACTTGACCGCTCTGACCA	75.3542	-1.93693	0.621898	-3.11455	0.00184226	0.0217964	hsa|mt-sRNA|Val|H|1653|tRF-5|21|CCA	hsa|mt-sRNA|Val|H|1653-CCA	tRF-5	CCA_0_mismatch	Mt_tRNA	H	sense	Val	within gene boundary	1653	1670	1602	1670	CCA
TTGGTCGTGGTTGTAGTCCGTGCGAGAATACCA	1399.99	-1.99035	0.727664	-2.73526	0.00623301	0.0476328	hsa|mt-sRNA|Glu|L|14674|tRH-3|33|CCA	hsa|mt-sRNA|Glu|L|14674-CCA	tRNA-half-3	CCA_0_mismatch	Mt_tRNA	L	sense	Glu	within gene boundary	14674	14703	14674	14742	CCA

## Sheet: hep-C vs no-cancer_annot
sequence	baseMean	log2FoldChange	lfcSE	stat	pvalue	padj	Specific-ID	General-ID	subtype	type	bio-type	strand	orientation	annotation	Sequence alignment	Sequence start position(bp)	Sequence end position(bp)	gene-boundary:start(bp)	gene-boundary:end(bp)	substitutions
AAAATGTTTAGACGGGCT	41.5089	2.01215	0.769613	2.6145	0.00893592	0.0524857	hsa|mt-sRNA|Phe|H|612|i-tRF-3|18|	hsa|mt-sRNA|Phe|H|612	i-tRF-3	normal_1_mismatch	Mt_tRNA	H	sense	Phe	within gene boundary	612	629	577	647
AAAATGTTTAGACGGGCTC	266.601	2.81048	0.814218	3.45176	0.000556946	0.00547307	hsa|mt-sRNA|Phe|H|612|i-tRF-3|19|	hsa|mt-sRNA|Phe|H|612	i-tRF-3	normal_1_mismatch	Mt_tRNA	H	sense	Phe	within gene boundary	612	630	577	647
AAACGCATGATTTCGACTC	11.4146	6.61364	1.30271	5.07682	3.8381e-07	8.34582e-06	hsa|mt-sRNA|Arg|H|10423|i-tRF-5|19|5A13	hsa|mt-sRNA|Arg|H|10423	i-tRF-5	normal_1_mismatch	Mt_tRNA	H	sense	Arg	within gene boundary	10423	10441	10405	10469	5A13
AAAGTTAAATTATAGGCT	12.5999	4.15552	1.13888	3.64877	0.0002635	0.00300891	hsa|mt-sRNA|Asp|H|7551|i-tRF-5|18|	hsa|mt-sRNA|Asp|H|7551	i-tRF-5	normal_1_mismatch	Mt_tRNA	H	sense	Asp	within gene boundary	7551	7568	7518	7585
AAATACAACGATGGTTTTTCATATCATTGGTCGTGGTTGTAGTCCGTGCG	13.7019	-2.71361	0.892272	-3.04124	0.00235608	0.0181046	hsa|mt-sRNA|Glu|L|14680|i-tRF-3|50|	hsa|mt-sRNA|Glu|L|14680	i-tRF-3	normal_1_mismatch	Mt_tRNA	L	sense	Glu	within gene boundary	14680	14729	14674	14742
AAATACGCTATCGGGCCC	6.73946	5.82663	1.38302	4.21299	2.5201e-05	0.000375992	hsa|mt-sRNA|Met|H|4415|i-tRF-5|18|5A12	hsa|mt-sRNA|Met|H|4415	i-tRF-5	normal_1_mismatch	Mt_tRNA	H	sense	Met	within gene boundary	4415	4432	4402	4469	5A12
AAATACGCTATCGGGCCCA	5.61329	4.83986	1.28434	3.76837	0.000164319	0.00203556	hsa|mt-sRNA|Met|H|4415|i-tRF-5|19|5A13	hsa|mt-sRNA|Met|H|4415	i-tRF-5	normal_1_mismatch	Mt_tRNA	H	sense	Met	within gene boundary	4415	4433	4402	4469	5A13
AAATGTTTAGACGGGCT	19.8422	2.46508	0.812876	3.03254	0.00242507	0.0184957	hsa|mt-sRNA|Phe|H|613|i-tRF-3|17|	hsa|mt-sRNA|Phe|H|613	i-tRF-3	normal_1_mismatch	Mt_tRNA	H	sense	Phe	within gene boundary	613	629	577	647
AAATGTTTAGACGGGCTC	63.2827	2.98688	0.904866	3.30091	0.000963711	0.00895375	hsa|mt-sRNA|Phe|H|613|i-tRF-3|18|	hsa|mt-sRNA|Phe|H|613	i-tRF-3	normal_1_mismatch	Mt_tRNA	H	sense	Phe	within gene boundary	613	630	577	647
AAATGTTTAGACGGGCTCAC	17.5139	2.22684	0.890745	2.49997	0.0124203	0.0672853	hsa|mt-sRNA|Phe|H|613|i-tRF-3|20|	hsa|mt-sRNA|Phe|H|613	i-tRF-3	normal_1_mismatch	Mt_tRNA	H	sense	Phe	within gene boundary	613	632	577	647
AACCGGAGATGAAAAC	8.91412	4.46108	1.35575	3.29048	0.00100018	0.00912667	hsa|mt-sRNA|Thr|H|15923|i-tRF-3|16|	hsa|mt-sRNA|Thr|H|15923	i-tRF-3	normal_1_mismatch	Mt_tRNA	H	sense	Thr	within gene boundary	15923	15938	15888	15953
AACGATGGTTTTTCATATCATTGGTCGTGGTTGTAGTCCGTGCGAGAATA	174.002	-2.45003	0.615523	-3.98041	6.87975e-05	0.000919099	hsa|mt-sRNA|Glu|L|14674|tRF-3|50|	hsa|mt-sRNA|Glu|L|14674	tRF-3	normal_1_mismatch	Mt_tRNA	L	sense	Glu	within gene boundary	14674	14723	14674	14742
AACGATGGTTTTTCCTATCATTGGTCGTGGTTGTAGTCCGTGCGAGAATA	19.2239	-8.11123	1.25334	-6.47169	9.69136e-11	3.47529e-09	hsa|mt-sRNA|Glu|L|14674|tRF-3|50|35T14	hsa|mt-sRNA|Glu|L|14674	tRF-3	normal_1_mismatch	Mt_tRNA	L	sense	Glu	within gene boundary	14674	14723	14674	14742	35T14
AACTTCCACTTAGGAG	4.0431	5.12328	1.43518	3.56978	0.000357277	0.0039262	hsa|mt-sRNA|Val|H|1629|i-tRF-5|16|5A10	hsa|mt-sRNA|Val|H|1629	i-tRF-5	normal_1_mismatch	Mt_tRNA	H	sense	Val	within gene boundary	1629	1644	1602	1670	5A10
AAGAGTGTAGCTTAACACAAAGCACCCA	22.6533	-3.63276	0.760544	-4.77653	1.78344e-06	3.37533e-05	hsa|mt-sRNA|Val|H|1602|tRF-5|28|0C27	hsa|mt-sRNA|Val|H|1602	tRF-5	normal_1_mismatch	Mt_tRNA	H	sense	Val	within gene boundary	1602	1629	1602	1670	0C27
AAGATGGCAGAGCCC	10.8627	2.02843	0.84739	2.39373	0.0166779	0.0825416	hsa|mt-sRNA|Leu|H|3233|tRF-5|15|	hsa|mt-sRNA|Leu|H|3233	tRF-5	normal_1_mismatch	Mt_tRNA	H	sense	Leu	within gene boundary	3233	3247	3230	3304
AAGATTAAGAGAACC	128.646	1.80447	0.742935	2.42883	0.0151474	0.0777924	hsa|mt-sRNA|Lys|H|8332|i-tRF-3|15|	hsa|mt-sRNA|Lys|H|8332	i-tRF-3	normal_1_mismatch	Mt_tRNA	H	sense	Lys	within gene boundary	8332	8346	8295	8364
AAGCTCTCGGGCCCA	13.112	6.80586	1.23561	5.50811	3.62712e-08	9.04125e-07	hsa|mt-sRNA|Met|H|4419|i-tRF-5|15|5A9	hsa|mt-sRNA|Met|H|4419	i-tRF-5	normal_1_mismatch	Mt_tRNA	H	sense	Met	within gene boundary	4419	4433	4402	4469	5A9
AAGGATAACAGCTATCCATTGGTC	29.1864	1.75155	0.751787	2.32984	0.0198144	0.093969	hsa|mt-sRNA|Leu2|H|12273|i-tRF-5|24|	hsa|mt-sRNA|Leu2|H|12273	i-tRF-5	normal_1_mismatch	Mt_tRNA	H	sense	Leu2	within gene boundary	12273	12296	12266	12336
AAGGTATTAGAAAAACCATTTCATAACTTTGTCAAAGTTAAATTATAGGC	24.2262	3.12195	1.11317	2.80457	0.00503845	0.0338628	hsa|mt-sRNA|Asp|H|7518|tRF-5|50|	hsa|mt-sRNA|Asp|H|7518	tRF-5	normal_1_mismatch	Mt_tRNA	H	sense	Asp	within gene boundary	7518	7567	7518	7585
AAGGTATTGGAAAAAC	19.4424	2.35515	0.768404	3.06499	0.00217676	0.0168534	hsa|mt-sRNA|Asp|H|7518|tRF-5|16|8A7	hsa|mt-sRNA|Asp|H|7518	tRF-5	normal_1_mismatch	Mt_tRNA	H	sense	Asp	within gene boundary	7518	7533	7518	7585	8A7
AAGGTATTGGAAAAACCATTTCATAACTTTGTCAAAGTTAAATTATAGGC	102.62	2.79221	0.876968	3.18393	0.00145288	0.0121708	hsa|mt-sRNA|Asp|H|7518|tRF-5|50|8A41	hsa|mt-sRNA|Asp|H|7518	tRF-5	normal_1_mismatch	Mt_tRNA	H	sense	Asp	within gene boundary	7518	7567	7518	7585	8A41
AAGGTATTTGAAAAACCATTTCATAACTTTGTCAAAGTTAAATTATAGGC	31.623	3.07861	0.970887	3.17093	0.00151954	0.0126773	hsa|mt-sRNA|Asp|H|7518|tRF-5|50|8A41	hsa|mt-sRNA|Asp|H|7518	tRF-5	normal_1_mismatch	Mt_tRNA	H	sense	Asp	within gene boundary	7518	7567	7518	7585	8A41
AAGTTAAATTATAGGCT	20.9218	3.99497	1.00231	3.98576	6.72642e-05	0.000904587	hsa|mt-sRNA|Asp|H|7552|i-tRF-3|17|	hsa|mt-sRNA|Asp|H|7552	i-tRF-3	normal_1_mismatch	Mt_tRNA	H	sense	Asp	within gene boundary	7552	7568	7518	7585
AATACAACGATGGTTTTTCATATCATTGGTCGTGGTTGTAGTCCGTGCGA	20.4864	-2.35536	0.776597	-3.03293	0.00242192	0.0184957	hsa|mt-sRNA|Glu|L|14679|i-tRF-3|50|	hsa|mt-sRNA|Glu|L|14679	i-tRF-3	normal_1_mismatch	Mt_tRNA	L	sense	Glu	within gene boundary	14679	14728	14674	14742
AATGTTGGTTATACC	6.63498	2.21271	0.916456	2.41442	0.0157604	0.0799363	hsa|mt-sRNA|Met|H|4443|i-tRF-3|15|	hsa|mt-sRNA|Met|H|4443	i-tRF-3	normal_1_mismatch	Mt_tRNA	H	sense	Met	within gene boundary	4443	4457	4402	4469
AATGTTTAGACGGGC	95.7112	2.45799	0.755742	3.25242	0.00114426	0.00999512	hsa|mt-sRNA|Phe|H|614|i-tRF-3|15|	hsa|mt-sRNA|Phe|H|614	i-tRF-3	normal_1_mismatch	Mt_tRNA	H	sense	Phe	within gene boundary	614	628	577	647
AATGTTTAGACGGGCT	93.1372	3.2396	0.727333	4.45408	8.42552e-06	0.000135604	hsa|mt-sRNA|Phe|H|614|i-tRF-3|16|	hsa|mt-sRNA|Phe|H|614	i-tRF-3	normal_1_mismatch	Mt_tRNA	H	sense	Phe	within gene boundary	614	629	577	647
AATGTTTAGACGGGCTC	791.347	4.09338	0.838301	4.88295	1.0451e-06	2.07397e-05	hsa|mt-sRNA|Phe|H|614|i-tRF-3|17|	hsa|mt-sRNA|Phe|H|614	i-tRF-3	normal_1_mismatch	Mt_tRNA	H	sense	Phe	within gene boundary	614	630	577	647
AATGTTTAGACGGGCTCA	29.2597	1.90896	0.615719	3.10037	0.00193282	0.0153723	hsa|mt-sRNA|Phe|H|614|i-tRF-3|18|	hsa|mt-sRNA|Phe|H|614	i-tRF-3	normal_1_mismatch	Mt_tRNA	H	sense	Phe	within gene boundary	614	631	577	647
AATGTTTAGACGGGCTCAC	57.2292	2.5475	0.704661	3.61522	0.000300091	0.00337026	hsa|mt-sRNA|Phe|H|614|i-tRF-3|19|	hsa|mt-sRNA|Phe|H|614	i-tRF-3	normal_1_mismatch	Mt_tRNA	H	sense	Phe	within gene boundary	614	632	577	647
ACAACGATGGTTTTTCATATCATTGGTCGTGGTTGTAGTCCGTGCGAGAA	17.2478	-2.47553	0.685757	-3.60992	0.00030629	0.00342107	hsa|mt-sRNA|Glu|L|14676|tRF-3|50|	hsa|mt-sRNA|Glu|L|14676	tRF-3	normal_1_mismatch	Mt_tRNA	L	sense	Glu	within gene boundary	14676	14725	14674	14742
ACAAGAACTGCTAACTCATGCCCCCATGTCTAACAACATGGCTTTCTCAC	212.435	-2.00328	0.563658	-3.55406	0.00037933	0.00405942	hsa|mt-sRNA|Ser2|H|12217|tRF-3|50|49A0	hsa|mt-sRNA|Ser2|H|12217	tRF-3	normal_1_mismatch	Mt_tRNA	H	sense	Ser2	within gene boundary	12217	12266	12207	12265	49A0
ACAAGAACTGCTAACTCATGCCCCCATGTCTAACAACATGGCTTTCTCAT	19.2324	-2.15047	0.745286	-2.88542	0.00390886	0.0276461	hsa|mt-sRNA|Ser2|H|12217|tRF-3|50|49A0	hsa|mt-sRNA|Ser2|H|12217	tRF-3	normal_1_mismatch	Mt_tRNA	H	sense	Ser2	within gene boundary	12217	12266	12207	12265	49A0
ACAAGCACTGCTAACTCATGCCCCCATGTCTAACAACATGGCTTTCT	13.8072	6.12938	1.35262	4.53149	5.85692e-06	9.57724e-05	hsa|mt-sRNA|Ser2|H|12217|tRF-3|47|5A41	hsa|mt-sRNA|Ser2|H|12217	tRF-3	normal_1_mismatch	Mt_tRNA	H	sense	Ser2	within gene boundary	12217	12263	12207	12265	5A41
ACAGACCAAGAGCCTTCA	10.2902	2.19257	0.898293	2.44082	0.014654	0.0761783	hsa|mt-sRNA|Trp|H|5529|i-tRF-5|18|	hsa|mt-sRNA|Trp|H|5529	i-tRF-5	normal_1_mismatch	Mt_tRNA	H	sense	Trp	within gene boundary	5529	5546	5512	5579
ACAGCTATCCATTGGTCT	43.3117	1.60635	0.650815	2.46822	0.0135787	0.0717179	hsa|mt-sRNA|Leu2|H|12280|i-tRF-5|18|	hsa|mt-sRNA|Leu2|H|12280	i-tRF-5	normal_1_mismatch	Mt_tRNA	H	sense	Leu2	within gene boundary	12280	12297	12266	12336
ACATGGCTTTCTCACC	28.3225	1.89912	0.720025	2.63757	0.00835023	0.0496159	hsa|mt-sRNA|Ser2|H|12252|tRF-3|16|14A1	hsa|mt-sRNA|Ser2|H|12252	tRF-3	normal_1_mismatch	Mt_tRNA	H	sense	Ser2	within gene boundary	12252	12267	12207	12265	14A1
ACCGGAGATGAAAAC	19.3509	2.80873	0.963329	2.91565	0.00354946	0.0255461	hsa|mt-sRNA|Thr|H|15924|i-tRF-3|15|	hsa|mt-sRNA|Thr|H|15924	i-tRF-3	normal_1_mismatch	Mt_tRNA	H	sense	Thr	within gene boundary	15924	15938	15888	15953
ACGAATGATTTCGACT	108.725	2.08383	0.757063	2.75252	0.00591388	0.0381324	hsa|mt-sRNA|Arg|H|10425|i-tRF-5|16|	hsa|mt-sRNA|Arg|H|10425	i-tRF-5	normal_1_mismatch	Mt_tRNA	H	sense	Arg	within gene boundary	10425	10440	10405	10469
ACGATGGTTTTTCATATCATTGGTCGTGGTTGTAGTCCGTGCGAGAATAC	431.409	-3.87589	0.599813	-6.46182	1.03451e-10	3.64575e-09	hsa|mt-sRNA|Glu|L|14673|tRF-3|50|0T49	hsa|mt-sRNA|Glu|L|14673	tRF-3	normal_1_mismatch	Mt_tRNA	L	sense	Glu	overlap gene boundary	14673	14722	14674	14742	0T49
ACGGGCTCACATCACC	47.0595	2.20082	0.738399	2.98053	0.00287754	0.021466	hsa|mt-sRNA|Phe|H|623|i-tRF-3|16|	hsa|mt-sRNA|Phe|H|623	i-tRF-3	normal_1_mismatch	Mt_tRNA	H	sense	Phe	within gene boundary	623	638	577	647
ACTCTTTTAGTATAAATAGTACCGTTAACT	12.0395	2.2088	0.861832	2.56291	0.0103798	0.0594293	hsa|mt-sRNA|Gly|H|9991|tRF-5|30|	hsa|mt-sRNA|Gly|H|9991	tRF-5	normal_1_mismatch	Mt_tRNA	H	sense	Gly	within gene boundary	9991	10020	9991	10058
ACTCTTTTAGTATAAATAGTACCGTTAACTTCC	32.0249	3.21006	0.936784	3.42668	0.000611006	0.00591894	hsa|mt-sRNA|Gly|H|9991|tRF-5|33|	hsa|mt-sRNA|Gly|H|9991	tRF-5	normal_1_mismatch	Mt_tRNA	H	sense	Gly	within gene boundary	9991	10023	9991	10058
ACTCTTTTGGTATAAATAGTACCGTTAACT	24.9953	2.26179	0.818259	2.76415	0.00570709	0.0372693	hsa|mt-sRNA|Gly|H|9991|tRF-5|30|8A21	hsa|mt-sRNA|Gly|H|9991	tRF-5	normal_1_mismatch	Mt_tRNA	H	sense	Gly	within gene boundary	9991	10020	9991	10058	8A21
ACTCTTTTGGTATAAATAGTACCGTTAACTTCC	58.4122	3.39625	0.926441	3.66591	0.000246461	0.0028623	hsa|mt-sRNA|Gly|H|9991|tRF-5|33|8A24	hsa|mt-sRNA|Gly|H|9991	tRF-5	normal_1_mismatch	Mt_tRNA	H	sense	Gly	within gene boundary	9991	10023	9991	10058	8A24
ACTCTTTTTGTATAAATAGTACCGTTAACT	29.2925	2.14759	0.86331	2.48763	0.0128598	0.0688101	hsa|mt-sRNA|Gly|H|9991|tRF-5|30|8A21	hsa|mt-sRNA|Gly|H|9991	tRF-5	normal_1_mismatch	Mt_tRNA	H	sense	Gly	within gene boundary	9991	10020	9991	10058	8A21
ACTCTTTTTGTATAAATAGTACCGTTAACTTCC	62.4224	3.71339	0.866707	4.28448	1.83168e-05	0.00027733	hsa|mt-sRNA|Gly|H|9991|tRF-5|33|8A24	hsa|mt-sRNA|Gly|H|9991	tRF-5	normal_1_mismatch	Mt_tRNA	H	sense	Gly	within gene boundary	9991	10023	9991	10058	8A24
ACTTACACTTAGGAG	114.797	3.29092	0.854946	3.84927	0.00011847	0.00150405	hsa|mt-sRNA|Val|H|1630|i-tRF-5|15|	hsa|mt-sRNA|Val|H|1630	i-tRF-5	normal_1_mismatch	Mt_tRNA	H	sense	Val	within gene boundary	1630	1644	1602	1670
ACTTACCTTGACCGCTCTGA	4.44169	5.22854	1.41051	3.70684	0.000209862	0.00249394	hsa|mt-sRNA|Val|H|1651|tRF-3|20|5A14	hsa|mt-sRNA|Val|H|1651	tRF-3	normal_1_mismatch	Mt_tRNA	H	sense	Val	within gene boundary	1651	1670	1602	1670	5A14
ACTTTGTCAAAGTTAAATTATAGGCT	28.1425	2.97134	0.916333	3.24265	0.00118425	0.0102568	hsa|mt-sRNA|Asp|H|7543|i-tRF-5|26|	hsa|mt-sRNA|Asp|H|7543	i-tRF-5	normal_1_mismatch	Mt_tRNA	H	sense	Asp	within gene boundary	7543	7568	7518	7585
ACTTTTAAAGGATAAC	30.5654	2.87509	0.783305	3.67046	0.00024211	0.00282785	hsa|mt-sRNA|Leu2|H|12266|tRF-5|16|	hsa|mt-sRNA|Leu2|H|12266	tRF-5	normal_1_mismatch	Mt_tRNA	H	sense	Leu2	within gene boundary	12266	12281	12266	12336
ACTTTTAAAGGATAACAGCT	36.4101	2.29247	0.890827	2.57342	0.01007	0.0579806	hsa|mt-sRNA|Leu2|H|12266|tRF-5|20|	hsa|mt-sRNA|Leu2|H|12266	tRF-5	normal_1_mismatch	Mt_tRNA	H	sense	Leu2	within gene boundary	12266	12285	12266	12336
ACTTTTAAAGGATAACAGCTATCCATTGGTCT	153.59	1.68335	0.617366	2.72666	0.00639786	0.0406125	hsa|mt-sRNA|Leu2|H|12266|tRF-5|32|	hsa|mt-sRNA|Leu2|H|12266	tRF-5	normal_1_mismatch	Mt_tRNA	H	sense	Leu2	within gene boundary	12266	12297	12266	12336
ACTTTTAAAGGATAACAGCTATCCATTGGTCTT	47.1241	3.00793	0.90815	3.31216	0.000925802	0.00864082	hsa|mt-sRNA|Leu2|H|12266|tRF-5|33|	hsa|mt-sRNA|Leu2|H|12266	tRF-5	normal_1_mismatch	Mt_tRNA	H	sense	Leu2	within gene boundary	12266	12298	12266	12336
ACTTTTAATGGATAAC	54.9323	2.40477	0.743231	3.23557	0.00121402	0.0104263	hsa|mt-sRNA|Leu2|H|12266|tRF-5|16|8A7	hsa|mt-sRNA|Leu2|H|12266	tRF-5	normal_1_mismatch	Mt_tRNA	H	sense	Leu2	within gene boundary	12266	12281	12266	12336	8A7
ACTTTTAATGGATAACAGCT	50.5525	2.0857	0.772848	2.69872	0.00696066	0.042949	hsa|mt-sRNA|Leu2|H|12266|tRF-5|20|8A11	hsa|mt-sRNA|Leu2|H|12266	tRF-5	normal_1_mismatch	Mt_tRNA	H	sense	Leu2	within gene boundary	12266	12285	12266	12336	8A11
ACTTTTAATGGATAACAGCTATCCATTGGTCT	286.514	1.76157	0.54609	3.22578	0.00125628	0.0106993	hsa|mt-sRNA|Leu2|H|12266|tRF-5|32|8A23	hsa|mt-sRNA|Leu2|H|12266	tRF-5	normal_1_mismatch	Mt_tRNA	H	sense	Leu2	within gene boundary	12266	12297	12266	12336	8A23
ACTTTTAATGGATAACAGCTATCCATTGGTCTT	97.8464	2.70546	0.8566	3.15837	0.00158654	0.0130762	hsa|mt-sRNA|Leu2|H|12266|tRF-5|33|8A24	hsa|mt-sRNA|Leu2|H|12266	tRF-5	normal_1_mismatch	Mt_tRNA	H	sense	Leu2	within gene boundary	12266	12298	12266	12336	8A24
ACTTTTAAGGGATAAC	65.719	2.60672	0.743137	3.50772	0.000451965	0.00461092	hsa|mt-sRNA|Leu2|H|12266|tRF-5|16|8A7	hsa|mt-sRNA|Leu2|H|12266	tRF-5	normal_1_mismatch	Mt_tRNA	H	sense	Leu2	within gene boundary	12266	12281	12266	12336	8A7
ACTTTTAAGGGATAACAGCT	49.4957	1.98263	0.73513	2.69698	0.00699707	0.042949	hsa|mt-sRNA|Leu2|H|12266|tRF-5|20|8A11	hsa|mt-sRNA|Leu2|H|12266	tRF-5	normal_1_mismatch	Mt_tRNA	H	sense	Leu2	within gene boundary	12266	12285	12266	12336	8A11
ACTTTTAAGGGATAACAGCTATCCATTGGTCT	407.685	1.96381	0.571166	3.43825	0.000585479	0.00569867	hsa|mt-sRNA|Leu2|H|12266|tRF-5|32|8A23	hsa|mt-sRNA|Leu2|H|12266	tRF-5	normal_1_mismatch	Mt_tRNA	H	sense	Leu2	within gene boundary	12266	12297	12266	12336	8A23
ACTTTTAAGGGATAACAGCTATCCATTGGTCTT	131.27	2.95632	0.824152	3.5871	0.000334373	0.00371444	hsa|mt-sRNA|Leu2|H|12266|tRF-5|33|8A24	hsa|mt-sRNA|Leu2|H|12266	tRF-5	normal_1_mismatch	Mt_tRNA	H	sense	Leu2	within gene boundary	12266	12298	12266	12336	8A24
AGAAAGGTCAGCTAAATAAGCTATCGGGCCC	31.9845	-5.91017	0.937083	-6.30699	2.84522e-10	9.38003e-09	hsa|mt-sRNA|Met|H|4402|tRF-5|31|2T28	hsa|mt-sRNA|Met|H|4402	tRF-5	normal_1_mismatch	Mt_tRNA	H	sense	Met	within gene boundary	4402	4432	4402	4469	2T28
AGAAATATGTCTGATAAAAGAGTTACTTTGATAGAG	29.2784	-3.10077	0.857695	-3.61524	0.000300069	0.00337026	hsa|mt-sRNA|Ile|H|4263|tRF-5|36|	hsa|mt-sRNA|Ile|H|4263	tRF-5	normal_1_mismatch	Mt_tRNA	H	sense	Ile	within gene boundary	4263	4298	4263	4331
AGACGGGCTCACATC	145.417	2.57142	0.895812	2.87049	0.0040983	0.0284929	hsa|mt-sRNA|Phe|H|621|i-tRF-3|15|	hsa|mt-sRNA|Phe|H|621	i-tRF-3	normal_1_mismatch	Mt_tRNA	H	sense	Phe	within gene boundary	621	635	577	647
AGACGGGCTCACATCACC	40.8009	1.91849	0.752028	2.55108	0.0107388	0.0609726	hsa|mt-sRNA|Phe|H|621|i-tRF-3|18|	hsa|mt-sRNA|Phe|H|621	i-tRF-3	normal_1_mismatch	Mt_tRNA	H	sense	Phe	within gene boundary	621	638	577	647
AGACGGGCTCACATCACCC	18.5855	2.22155	0.87514	2.53851	0.0111326	0.0626858	hsa|mt-sRNA|Phe|H|621|i-tRF-3|19|	hsa|mt-sRNA|Phe|H|621	i-tRF-3	normal_1_mismatch	Mt_tRNA	H	sense	Phe	within gene boundary	621	639	577	647
AGCAAGGTCAGCTAAATAAGCTATCGGGCCC	17.6893	-4.71152	0.881113	-5.34724	8.93062e-08	2.09818e-06	hsa|mt-sRNA|Met|H|4402|tRF-5|31|2T28	hsa|mt-sRNA|Met|H|4402	tRF-5	normal_1_mismatch	Mt_tRNA	H	sense	Met	within gene boundary	4402	4432	4402	4469	2T28
AGATTTCAACTTAACTTGACCGCTCTG	3.65487	-2.85193	1.10151	-2.58912	0.00962223	0.0558011	hsa|mt-sRNA|Val|H|1643|tRF-3|27|	hsa|mt-sRNA|Val|H|1643	tRF-3	normal_1_mismatch	Mt_tRNA	H	sense	Val	within gene boundary	1643	1669	1602	1670
AGATTTCAACTTAACTTGACCGCTCTGAC	140.103	-2.18176	0.910381	-2.39653	0.016551	0.0821121	hsa|mt-sRNA|Val|H|1643|tRF-3|29|28G0	hsa|mt-sRNA|Val|H|1643	tRF-3	normal_1_mismatch	Mt_tRNA	H	sense	Val	within gene boundary	1643	1671	1602	1670	28G0
AGCTCCGAGGTGATTTTCATATTGAATTG	62.6477	1.75798	0.72682	2.41872	0.0155751	0.0791929	hsa|mt-sRNA|Cys|L|5798|tRF-5|29|	hsa|mt-sRNA|Cys|L|5798	tRF-5	normal_1_mismatch	Mt_tRNA	L	sense	Cys	within gene boundary	5798	5826	5761	5826
AGCTATCCATTGGTC	118.863	2.06321	0.817268	2.52452	0.0115856	0.0638985	hsa|mt-sRNA|Leu2|H|12282|i-tRF-5|15|	hsa|mt-sRNA|Leu2|H|12282	i-tRF-5	normal_1_mismatch	Mt_tRNA	H	sense	Leu2	within gene boundary	12282	12296	12266	12336
AGCTATCCATTGGTCT	37.6918	2.66287	0.845418	3.14977	0.00163401	0.0133596	hsa|mt-sRNA|Leu2|H|12282|i-tRF-5|16|	hsa|mt-sRNA|Leu2|H|12282	i-tRF-5	normal_1_mismatch	Mt_tRNA	H	sense	Leu2	within gene boundary	12282	12297	12266	12336
AGCTCCGAGGTGATTTTCATATTGAATTGC	89.7053	3.70113	1.03736	3.56784	0.000359933	0.00393424	hsa|mt-sRNA|Cys|L|5797|tRF-5|30|	hsa|mt-sRNA|Cys|L|5797	tRF-5	normal_1_mismatch	Mt_tRNA	L	sense	Cys	within gene boundary	5797	5826	5761	5826
AGGAAGGTCAGCTAAATAAGCTATCGGGCCC	47.3101	-7.9992	1.15025	-6.95433	3.54242e-12	1.90545e-10	hsa|mt-sRNA|Met|H|4402|tRF-5|31|2T28	hsa|mt-sRNA|Met|H|4402	tRF-5	normal_1_mismatch	Mt_tRNA	H	sense	Met	within gene boundary	4402	4432	4402	4469	2T28
AGGAGATTTCAACTTAACTTGACCGCTCTG	5.2596	-2.35637	1.00629	-2.34164	0.019199	0.0917393	hsa|mt-sRNA|Val|H|1640|tRF-3|30|	hsa|mt-sRNA|Val|H|1640	tRF-3	normal_1_mismatch	Mt_tRNA	H	sense	Val	within gene boundary	1640	1669	1602	1670
AGGGATAACAGCTATCCATTGGTCT	13.7708	3.25248	0.956698	3.39969	0.000674623	0.00644359	hsa|mt-sRNA|Leu2|H|12273|i-tRF-5|25|1A23	hsa|mt-sRNA|Leu2|H|12273	i-tRF-5	normal_1_mismatch	Mt_tRNA	H	sense	Leu2	within gene boundary	12273	12297	12266	12336	1A23
AGTAAGGTCAGCTAA	12.4292	3.10804	0.849718	3.65774	0.000254452	0.00292206	hsa|mt-sRNA|Met|H|4402|tRF-5|15|	hsa|mt-sRNA|Met|H|4402	tRF-5	normal_1_mismatch	Mt_tRNA	H	sense	Met	within gene boundary	4402	4416	4402	4469
AGTAAGGTCAGCTAAA	36.6384	2.43586	0.691096	3.52463	0.000424078	0.00440008	hsa|mt-sRNA|Met|H|4402|tRF-5|16|	hsa|mt-sRNA|Met|H|4402	tRF-5	normal_1_mismatch	Mt_tRNA	H	sense	Met	within gene boundary	4402	4417	4402	4469
AGTAAGGTCAGCTAAAT	106.056	4.22187	0.891168	4.73745	2.16419e-06	4.05836e-05	hsa|mt-sRNA|Met|H|4402|tRF-5|17|	hsa|mt-sRNA|Met|H|4402	tRF-5	normal_1_mismatch	Mt_tRNA	H	sense	Met	within gene boundary	4402	4418	4402	4469
AGTAAGGTCAGCTAAATAAGCTATCGGGC	480	-1.47448	0.509338	-2.8949	0.00379277	0.0270665	hsa|mt-sRNA|Met|H|4402|tRF-5|29|	hsa|mt-sRNA|Met|H|4402	tRF-5	normal_1_mismatch	Mt_tRNA	H	sense	Met	within gene boundary	4402	4430	4402	4469
AGTACGGTCAGCTAAATAAGCTATCGGGCCC	30.5017	-4.92343	0.837652	-5.87765	4.16126e-09	1.14941e-07	hsa|mt-sRNA|Met|H|4402|tRF-5|31|4A26	hsa|mt-sRNA|Met|H|4402	tRF-5	normal_1_mismatch	Mt_tRNA	H	sense	Met	within gene boundary	4402	4432	4402	4469	4A26
AGTAAGGTCCGCTAAATAAGCTATCGGGCCCATA	93.7759	-10.3931	1.21392	-8.56157	1.11339e-17	2.06889e-15	hsa|mt-sRNA|Met|H|4402|tRF-5|34|9A24	hsa|mt-sRNA|Met|H|4402	tRF-5	normal_1_mismatch	Mt_tRNA	H	sense	Met	within gene boundary	4402	4435	4402	4469	9A24
AGTAAGGTCCGCTAAATAAGCTATCGGGCCCATACCCCGAAAATGTTGGT	46.5883	-5.63475	0.8318	-6.77416	1.25132e-11	5.21979e-10	hsa|mt-sRNA|Met|H|4402|tRF-5|50|9A40	hsa|mt-sRNA|Met|H|4402	tRF-5	normal_1_mismatch	Mt_tRNA	H	sense	Met	within gene boundary	4402	4451	4402	4469	9A40
AGTAAGGTTAGCTAAATAAGCTATCGGGCC	24.2766	3.00425	0.804794	3.73295	0.000189252	0.00228894	hsa|mt-sRNA|Met|H|4402|tRF-5|30|8C21	hsa|mt-sRNA|Met|H|4402	tRF-5	normal_1_mismatch	Mt_tRNA	H	sense	Met	within gene boundary	4402	4431	4402	4469	8C21
AGTAAGGTTAGCTAAATAAGCTATCGGGCCC	123.858	2.59297	0.692148	3.74627	0.000179483	0.00218371	hsa|mt-sRNA|Met|H|4402|tRF-5|31|8C22	hsa|mt-sRNA|Met|H|4402	tRF-5	normal_1_mismatch	Mt_tRNA	H	sense	Met	within gene boundary	4402	4432	4402	4469	8C22
AGTAAGGTCAGCTACATAAGCTATCGGGC	46.0326	-9.36386	1.23579	-7.57721	3.53059e-14	2.67278e-12	hsa|mt-sRNA|Met|H|4402|tRF-5|29|14A14	hsa|mt-sRNA|Met|H|4402	tRF-5	normal_1_mismatch	Mt_tRNA	H	sense	Met	within gene boundary	4402	4430	4402	4469	14A14
AGTAAGGTCAGCTACATAAGCTATCGGGCC	25.5905	-8.51868	1.23568	-6.89395	5.42637e-12	2.46478e-10	hsa|mt-sRNA|Met|H|4402|tRF-5|30|14A15	hsa|mt-sRNA|Met|H|4402	tRF-5	normal_1_mismatch	Mt_tRNA	H	sense	Met	within gene boundary	4402	4431	4402	4469	14A15
AGTAAGGTCAGCTACATAAGCTATCGGGCCC	216.042	-11.5998	1.22756	-9.44949	3.40484e-21	1.73987e-18	hsa|mt-sRNA|Met|H|4402|tRF-5|31|14A16	hsa|mt-sRNA|Met|H|4402	tRF-5	normal_1_mismatch	Mt_tRNA	H	sense	Met	within gene boundary	4402	4432	4402	4469	14A16
AGTAAGGTCAGCTACATAAGCTATCGGGCCCA	89.4549	-10.3242	1.25506	-8.22603	1.93523e-16	2.47225e-14	hsa|mt-sRNA|Met|H|4402|tRF-5|32|14A17	hsa|mt-sRNA|Met|H|4402	tRF-5	normal_1_mismatch	Mt_tRNA	H	sense	Met	within gene boundary	4402	4433	4402	4469	14A17
AGTAAGGTCAGCTACATAAGCTATCGGGCCCATA	44.9041	-8.60076	1.24018	-6.93511	4.05905e-12	2.05727e-10	hsa|mt-sRNA|Met|H|4402|tRF-5|34|14A19	hsa|mt-sRNA|Met|H|4402	tRF-5	normal_1_mismatch	Mt_tRNA	H	sense	Met	within gene boundary	4402	4435	4402	4469	14A19
AGTAAGGTCAGCTACATAAGCTATCGGGCCCATACCCCGAAAATGTTGGT	22.6411	-8.3502	1.23422	-6.76558	1.32774e-11	5.42782e-10	hsa|mt-sRNA|Met|H|4402|tRF-5|50|14A35	hsa|mt-sRNA|Met|H|4402	tRF-5	normal_1_mismatch	Mt_tRNA	H	sense	Met	within gene boundary	4402	4451	4402	4469	14A35
AGTAAGGTCCGCTAAATAAGCTATCGGGC	74.0913	-9.33288	1.19636	-7.80106	6.13911e-15	5.9754e-13	hsa|mt-sRNA|Met|H|4402|tRF-5|29|9A19	hsa|mt-sRNA|Met|H|4402	tRF-5	normal_1_mismatch	Mt_tRNA	H	sense	Met	within gene boundary	4402	4430	4402	4469	9A19
AGTAAGGTCCGCTAAATAAGCTATCGGGCC	55.3277	-7.61509	1.0499	-7.25318	4.07102e-13	2.60036e-11	hsa|mt-sRNA|Met|H|4402|tRF-5|30|9A20	hsa|mt-sRNA|Met|H|4402	tRF-5	normal_1_mismatch	Mt_tRNA	H	sense	Met	within gene boundary	4402	4431	4402	4469	9A20
AGTAAGGTCCGCTAAATAAGCTATCGGGCCC	431.332	-7.73806	0.667281	-11.5964	4.29743e-31	8.78394e-28	hsa|mt-sRNA|Met|H|4402|tRF-5|31|9A21	hsa|mt-sRNA|Met|H|4402	tRF-5	normal_1_mismatch	Mt_tRNA	H	sense	Met	within gene boundary	4402	4432	4402	4469	9A21
AGTAAGGTCCGCTAAATAAGCTATCGGGCCCA	158.774	-9.71634	1.14949	-8.45271	2.84628e-17	4.15557e-15	hsa|mt-sRNA|Met|H|4402|tRF-5|32|9A22	hsa|mt-sRNA|Met|H|4402	tRF-5	normal_1_mismatch	Mt_tRNA	H	sense	Met	within gene boundary	4402	4433	4402	4469	9A22
AGTGAAGCATTGGAC	28.7884	2.98237	0.958267	3.11226	0.00185663	0.0148241	hsa|mt-sRNA|Tyr|L|5864|i-tRF-5|15|	hsa|mt-sRNA|Tyr|L|5864	i-tRF-5	normal_1_mismatch	Mt_tRNA	L	sense	Tyr	within gene boundary	5864	5878	5826	5891
AGTCAGGTCAGCTAAATAAGCTATCGGGCCC	67.8434	-7.47621	0.965856	-7.74051	9.90207e-15	8.79993e-13	hsa|mt-sRNA|Met|H|4402|tRF-5|31|3A27	hsa|mt-sRNA|Met|H|4402	tRF-5	normal_1_mismatch	Mt_tRNA	H	sense	Met	within gene boundary	4402	4432	4402	4469	3A27
AGTCAGGTCAGCTAAATAAGCTATCGGGCCCA	29.7605	-8.7336	1.22509	-7.12893	1.0115e-12	6.08092e-11	hsa|mt-sRNA|Met|H|4402|tRF-5|32|3A28	hsa|mt-sRNA|Met|H|4402	tRF-5	normal_1_mismatch	Mt_tRNA	H	sense	Met	within gene boundary	4402	4433	4402	4469	3A28
AGTAAGGTCAGCTAAATAAGCTATCGGGCCCCTA	13.1017	5.39754	1.14078	4.73146	2.22916e-06	4.14218e-05	hsa|mt-sRNA|Met|H|4402|tRF-5|34|31A2	hsa|mt-sRNA|Met|H|4402	tRF-5	normal_1_mismatch	Mt_tRNA	H	sense	Met	within gene boundary	4402	4435	4402	4469	31A2
AGTAAGGTCAGCTAAATAAGCTATCGGGCCCCTACCCCGAAAATGTTGGT	43.7745	8.53693	1.36006	6.27686	3.4547e-10	1.10334e-08	hsa|mt-sRNA|Met|H|4402|tRF-5|50|31A18	hsa|mt-sRNA|Met|H|4402	tRF-5	normal_1_mismatch	Mt_tRNA	H	sense	Met	within gene boundary	4402	4451	4402	4469	31A18
AGTAAGGTCAGCTAAATAAGCTATCGGGCCTATACCCCGAAAATGTTGGT	12.418	3.14564	1.05177	2.99082	0.00278226	0.0208313	hsa|mt-sRNA|Met|H|4402|tRF-5|50|30C19	hsa|mt-sRNA|Met|H|4402	tRF-5	normal_1_mismatch	Mt_tRNA	H	sense	Met	within gene boundary	4402	4451	4402	4469	30C19
AGTAAGGTCAGCTAAATAAGCTATCGGGCCCATACCCCGAAAATGTTGGT	1312.43	2.41586	0.822451	2.93739	0.00330986	0.0241266	hsa|mt-sRNA|Met|H|4402|tRF-5|50|	hsa|mt-sRNA|Met|H|4402	tRF-5	normal_1_mismatch	Mt_tRNA	H	sense	Met	within gene boundary	4402	4451	4402	4469
AGTAAGGTCAGCTAAATAAGCTATCGGGCCCC	39.8284	4.25709	0.87569	4.86141	1.16554e-06	2.26892e-05	hsa|mt-sRNA|Met|H|4402|tRF-5|32|31A0	hsa|mt-sRNA|Met|H|4402	tRF-5	normal_1_mismatch	Mt_tRNA	H	sense	Met	within gene boundary	4402	4433	4402	4469	31A0
AGTTAAATTATAGGCT	50.4008	3.74216	0.935232	4.00132	6.29909e-05	0.000869955	hsa|mt-sRNA|Asp|H|7553|i-tRF-3|16|	hsa|mt-sRNA|Asp|H|7553	i-tRF-3	normal_1_mismatch	Mt_tRNA	H	sense	Asp	within gene boundary	7553	7568	7518	7585
ATACAACGATGGTTTTTCATATCATTGGTCGTGGTTGTAGTCCGTGCGAG	30.5085	-2.76413	0.864311	-3.19808	0.00138348	0.0117337	hsa|mt-sRNA|Glu|L|14678|i-tRF-3|50|	hsa|mt-sRNA|Glu|L|14678	i-tRF-3	normal_1_mismatch	Mt_tRNA	L	sense	Glu	within gene boundary	14678	14727	14674	14742
ATACAGACCAAGAGC	21.6451	2.1102	0.883132	2.38945	0.0168738	0.0831084	hsa|mt-sRNA|Trp|H|5527|i-tRF-5|15|	hsa|mt-sRNA|Trp|H|5527	i-tRF-5	normal_1_mismatch	Mt_tRNA	H	sense	Trp	within gene boundary	5527	5541	5512	5579
ATAGAGTAAATAATAGGAGCT	23.075	2.07478	0.760252	2.72907	0.00635141	0.0406125	hsa|mt-sRNA|Ile|H|4293|i-tRF-5|21|	hsa|mt-sRNA|Ile|H|4293	i-tRF-5	normal_1_mismatch	Mt_tRNA	H	sense	Ile	within gene boundary	4293	4313	4263	4331
ATAGGCGCTTAAACCC	6.42297	4.45574	1.2611	3.53321	0.000410552	0.00432561	hsa|mt-sRNA|Ile|H|4305|i-tRF-3|16|5A10	hsa|mt-sRNA|Ile|H|4305	i-tRF-3	normal_1_mismatch	Mt_tRNA	H	sense	Ile	within gene boundary	4305	4320	4263	4331	5A10
ATCCATTGGTCTTAGGCCCC	14.9234	1.96898	0.851928	2.3112	0.0208217	0.0979267	hsa|mt-sRNA|Leu2|H|12286|i-tRF-5|20|	hsa|mt-sRNA|Leu2|H|12286	i-tRF-5	normal_1_mismatch	Mt_tRNA	H	sense	Leu2	within gene boundary	12286	12305	12266	12336
ATCCATTGGTCTTAG	30.1919	2.19522	0.836132	2.62545	0.00865336	0.0511198	hsa|mt-sRNA|Leu2|H|12286|i-tRF-5|15|	hsa|mt-sRNA|Leu2|H|12286	i-tRF-5	normal_1_mismatch	Mt_tRNA	H	sense	Leu2	within gene boundary	12286	12300	12266	12336
ATGTTTAGACGGGCT	2723.19	3.11514	0.886806	3.51277	0.000443469	0.00457803	hsa|mt-sRNA|Phe|H|615|i-tRF-3|15|	hsa|mt-sRNA|Phe|H|615	i-tRF-3	normal_1_mismatch	Mt_tRNA	H	sense	Phe	within gene boundary	615	629	577	647
ATGTTTAGACGGGCTC	2487.2	3.34584	0.846546	3.95234	7.73902e-05	0.00100755	hsa|mt-sRNA|Phe|H|615|i-tRF-3|16|	hsa|mt-sRNA|Phe|H|615	i-tRF-3	normal_1_mismatch	Mt_tRNA	H	sense	Phe	within gene boundary	615	630	577	647
ATGTTTAGACGGGCTCA	236.486	2.51816	0.748436	3.36456	0.00076666	0.00728862	hsa|mt-sRNA|Phe|H|615|i-tRF-3|17|	hsa|mt-sRNA|Phe|H|615	i-tRF-3	normal_1_mismatch	Mt_tRNA	H	sense	Phe	within gene boundary	615	631	577	647
ATGTTTAGACGGGCTCAC	533.839	2.63661	0.737115	3.57693	0.000347647	0.00384103	hsa|mt-sRNA|Phe|H|615|i-tRF-3|18|	hsa|mt-sRNA|Phe|H|615	i-tRF-3	normal_1_mismatch	Mt_tRNA	H	sense	Phe	within gene boundary	615	632	577	647
ATGTTTAGACGGGCTCACA	242.672	1.65825	0.707783	2.34288	0.0191358	0.0917393	hsa|mt-sRNA|Phe|H|615|i-tRF-3|19|	hsa|mt-sRNA|Phe|H|615	i-tRF-3	normal_1_mismatch	Mt_tRNA	H	sense	Phe	within gene boundary	615	633	577	647
ATGTTTAGACGGGCTCACAT	52.1365	2.02157	0.759273	2.66251	0.00775608	0.046491	hsa|mt-sRNA|Phe|H|615|i-tRF-3|20|	hsa|mt-sRNA|Phe|H|615	i-tRF-3	normal_1_mismatch	Mt_tRNA	H	sense	Phe	within gene boundary	615	634	577	647
ATGTTTCGACGGGCT	25.0671	-4.83564	0.935909	-5.16679	2.38153e-07	5.29113e-06	hsa|mt-sRNA|Phe|H|615|i-tRF-3|15|6A8	hsa|mt-sRNA|Phe|H|615	i-tRF-3	normal_1_mismatch	Mt_tRNA	H	sense	Phe	within gene boundary	615	629	577	647	6A8
ATGTTTCGACGGGCTC	23.0972	-6.89765	1.23319	-5.59336	2.22717e-08	5.83634e-07	hsa|mt-sRNA|Phe|H|615|i-tRF-3|16|6A9	hsa|mt-sRNA|Phe|H|615	i-tRF-3	normal_1_mismatch	Mt_tRNA	H	sense	Phe	within gene boundary	615	630	577	647	6A9
ATTGTGAATCTGACAA	3.67115	2.81539	1.21959	2.30846	0.0209734	0.0980997	hsa|mt-sRNA|His|H|12165|i-tRF-5|16|	hsa|mt-sRNA|His|H|12165	i-tRF-5	normal_1_mismatch	Mt_tRNA	H	sense	His	within gene boundary	12165	12180	12138	12206
CAACGATGGTTTTTCATATCATTGGTCGTGGTTGTAGTCCGTGCGAGAAT	17.7358	-2.18314	0.720315	-3.03082	0.00243891	0.0185321	hsa|mt-sRNA|Glu|L|14675|tRF-3|50|	hsa|mt-sRNA|Glu|L|14675	tRF-3	normal_1_mismatch	Mt_tRNA	L	sense	Glu	within gene boundary	14675	14724	14674	14742
CAAGACCTGCTAACTCATGCCCCCATGTCTAACAACATGGCTTTCT	6.35214	5.76203	1.45784	3.95245	7.73558e-05	0.00100755	hsa|mt-sRNA|Ser2|H|12218|tRF-3|46|5A40	hsa|mt-sRNA|Ser2|H|12218	tRF-3	normal_1_mismatch	Mt_tRNA	H	sense	Ser2	within gene boundary	12218	12263	12207	12265	5A40
CACAAGAACTGCTAACTCATGCCCCCATGTCTAACAACATGGCTTTCTCA	42.9111	-1.53758	0.642684	-2.39243	0.0167371	0.0826342	hsa|mt-sRNA|Ser2|H|12216|tRF-3|50|	hsa|mt-sRNA|Ser2|H|12216	tRF-3	normal_1_mismatch	Mt_tRNA	H	sense	Ser2	within gene boundary	12216	12265	12207	12265
CACTGTAAAGCTAAC	35.2062	2.68318	0.756358	3.5475	0.000388901	0.00411872	hsa|mt-sRNA|Lys|H|8295|tRF-5|15|	hsa|mt-sRNA|Lys|H|8295	tRF-5	normal_1_mismatch	Mt_tRNA	H	sense	Lys	within gene boundary	8295	8309	8295	8364
CACTGTAAAGCTAACT	208.094	1.81575	0.655377	2.77054	0.0055964	0.0367815	hsa|mt-sRNA|Lys|H|8295|tRF-5|16|	hsa|mt-sRNA|Lys|H|8295	tRF-5	normal_1_mismatch	Mt_tRNA	H	sense	Lys	within gene boundary	8295	8310	8295	8364
CACTGTAAAGCTAACTTAGCATTAACCTTTTACGTTAAAGATTAAGAGAA	20.6134	5.00879	1.1032	4.54026	5.61856e-06	9.26155e-05	hsa|mt-sRNA|Lys|H|8295|tRF-5|50|32A17	hsa|mt-sRNA|Lys|H|8295	tRF-5	normal_1_mismatch	Mt_tRNA	H	sense	Lys	within gene boundary	8295	8344	8295	8364	32A17
CACTGTAAGGCTAAC	75.0641	2.81249	0.718638	3.91365	9.09124e-05	0.00116871	hsa|mt-sRNA|Lys|H|8295|tRF-5|15|8A6	hsa|mt-sRNA|Lys|H|8295	tRF-5	normal_1_mismatch	Mt_tRNA	H	sense	Lys	within gene boundary	8295	8309	8295	8364	8A6
CACTGTAAGGCTAACT	217.371	2.1809	0.65045	3.35292	0.000799652	0.00749765	hsa|mt-sRNA|Lys|H|8295|tRF-5|16|8A7	hsa|mt-sRNA|Lys|H|8295	tRF-5	normal_1_mismatch	Mt_tRNA	H	sense	Lys	within gene boundary	8295	8310	8295	8364	8A7
CACTGTAAGGCTAACTT	26.8795	2.3184	0.887089	2.61349	0.00896222	0.0524893	hsa|mt-sRNA|Lys|H|8295|tRF-5|17|8A8	hsa|mt-sRNA|Lys|H|8295	tRF-5	normal_1_mismatch	Mt_tRNA	H	sense	Lys	within gene boundary	8295	8311	8295	8364	8A8
CACTGTAAGGCTAACTTAGCATTA	46.9785	1.49574	0.586094	2.55205	0.010709	0.0609725	hsa|mt-sRNA|Lys|H|8295|tRF-5|24|8A15	hsa|mt-sRNA|Lys|H|8295	tRF-5	normal_1_mismatch	Mt_tRNA	H	sense	Lys	within gene boundary	8295	8318	8295	8364	8A15
CACTGTAAGGCTAACTTAGCATTAAC	37.8055	1.78531	0.664027	2.68861	0.00717497	0.0436477	hsa|mt-sRNA|Lys|H|8295|tRF-5|26|8A17	hsa|mt-sRNA|Lys|H|8295	tRF-5	normal_1_mismatch	Mt_tRNA	H	sense	Lys	within gene boundary	8295	8320	8295	8364	8A17
CACTGTAAAGCTAACTTAGCATTAACCTTTT	27.0569	1.99678	0.81077	2.46282	0.0137849	0.0724137	hsa|mt-sRNA|Lys|H|8295|tRF-5|31|	hsa|mt-sRNA|Lys|H|8295	tRF-5	normal_1_mismatch	Mt_tRNA	H	sense	Lys	within gene boundary	8295	8325	8295	8364
CACTGTAAAGCTAACTTAGCATTAACCTTTTAAGTTAA	42.334	-1.80022	0.685288	-2.62695	0.0086155	0.0510437	hsa|mt-sRNA|Lys|H|8295|tRF-5|38|	hsa|mt-sRNA|Lys|H|8295	tRF-5	normal_1_mismatch	Mt_tRNA	H	sense	Lys	within gene boundary	8295	8332	8295	8364
CACTGTAAGGCTAACTTAGCATTAACCTTTT	74.1571	2.22584	0.840488	2.64827	0.00809055	0.0483488	hsa|mt-sRNA|Lys|H|8295|tRF-5|31|8A22	hsa|mt-sRNA|Lys|H|8295	tRF-5	normal_1_mismatch	Mt_tRNA	H	sense	Lys	within gene boundary	8295	8325	8295	8364	8A22
CACTGTAAGGCTAACTTAGCATTAACCTTTTAAG	167.703	2.68317	0.730167	3.67473	0.000238102	0.00279701	hsa|mt-sRNA|Lys|H|8295|tRF-5|34|8A25	hsa|mt-sRNA|Lys|H|8295	tRF-5	normal_1_mismatch	Mt_tRNA	H	sense	Lys	within gene boundary	8295	8328	8295	8364	8A25
CAGACCAAGAGCCTTC	11.3439	3.6313	1.00189	3.62445	0.000289573	0.00328827	hsa|mt-sRNA|Trp|H|5530|i-tRF-5|16|	hsa|mt-sRNA|Trp|H|5530	i-tRF-5	normal_1_mismatch	Mt_tRNA	H	sense	Trp	within gene boundary	5530	5545	5512	5579
CAGACCAAGAGCCTTCA	7.94752	4.53037	1.20029	3.77441	0.000160387	0.00199897	hsa|mt-sRNA|Trp|H|5530|i-tRF-5|17|	hsa|mt-sRNA|Trp|H|5530	i-tRF-5	normal_1_mismatch	Mt_tRNA	H	sense	Trp	within gene boundary	5530	5546	5512	5579
CACTGTCAAGCTAACTTAGCATTAACCTTTTAAGTTAAAGATTAAGAGAA	30.78	-6.46283	0.992912	-6.50896	7.56728e-11	2.9184e-09	hsa|mt-sRNA|Lys|H|8295|tRF-5|50|6A43	hsa|mt-sRNA|Lys|H|8295	tRF-5	normal_1_mismatch	Mt_tRNA	H	sense	Lys	within gene boundary	8295	8344	8295	8364	6A43
CACTTAGGAGATTTCAACTTAACTTGACCGCTCTGAC	17.0109	-2.02769	0.79671	-2.54507	0.0109255	0.0618607	hsa|mt-sRNA|Val|H|1635|tRF-3|37|36G0	hsa|mt-sRNA|Val|H|1635	tRF-3	normal_1_mismatch	Mt_tRNA	H	sense	Val	within gene boundary	1635	1671	1602	1670	36G0
CACTGTAATGCTAACTTAGCATTAACCTTTTAAG	77.164	2.69122	0.80151	3.35768	0.000785987	0.00743776	hsa|mt-sRNA|Lys|H|8295|tRF-5|34|8A25	hsa|mt-sRNA|Lys|H|8295	tRF-5	normal_1_mismatch	Mt_tRNA	H	sense	Lys	within gene boundary	8295	8328	8295	8364	8A25
CACTGTAATGCTAAC	37.7137	2.31889	0.70796	3.27546	0.0010549	0.00949878	hsa|mt-sRNA|Lys|H|8295|tRF-5|15|8A6	hsa|mt-sRNA|Lys|H|8295	tRF-5	normal_1_mismatch	Mt_tRNA	H	sense	Lys	within gene boundary	8295	8309	8295	8364	8A6
CACTGTAATGCTAACT	119.86	2.13974	0.660574	3.23921	0.00119861	0.0103374	hsa|mt-sRNA|Lys|H|8295|tRF-5|16|8A7	hsa|mt-sRNA|Lys|H|8295	tRF-5	normal_1_mismatch	Mt_tRNA	H	sense	Lys	within gene boundary	8295	8310	8295	8364	8A7
CAGAGTGTAGCTTAAC	99.3043	3.43307	0.931499	3.68554	0.000228222	0.00269646	hsa|mt-sRNA|Val|H|1602|tRF-5|16|	hsa|mt-sRNA|Val|H|1602	tRF-5	normal_1_mismatch	Mt_tRNA	H	sense	Val	within gene boundary	1602	1617	1602	1670
CAGAGTGTTGCTTAAC	212.126	4.14508	0.828078	5.00567	5.56688e-07	1.16109e-05	hsa|mt-sRNA|Val|H|1602|tRF-5|16|8A7	hsa|mt-sRNA|Val|H|1602	tRF-5	normal_1_mismatch	Mt_tRNA	H	sense	Val	within gene boundary	1602	1617	1602	1670	8A7
CAGAGTGTTGCTTAACA	11.0127	4.76806	1.15976	4.11126	3.935e-05	0.000562458	hsa|mt-sRNA|Val|H|1602|tRF-5|17|8A8	hsa|mt-sRNA|Val|H|1602	tRF-5	normal_1_mismatch	Mt_tRNA	H	sense	Val	within gene boundary	1602	1618	1602	1670	8A8
CAGAGTGTTGCTTAACACAAAGCACCCA	477.694	1.44981	0.574684	2.5228	0.0116423	0.0639701	hsa|mt-sRNA|Val|H|1602|tRF-5|28|8A19	hsa|mt-sRNA|Val|H|1602	tRF-5	normal_1_mismatch	Mt_tRNA	H	sense	Val	within gene boundary	1602	1629	1602	1670	8A19
CAGAGTGTTGCTTAACACAAAGCACCCAAC	21.6737	1.49148	0.616106	2.42082	0.0154855	0.0789338	hsa|mt-sRNA|Val|H|1602|tRF-5|30|8A21	hsa|mt-sRNA|Val|H|1602	tRF-5	normal_1_mismatch	Mt_tRNA	H	sense	Val	within gene boundary	1602	1631	1602	1670	8A21
CAGAGTGTTGCTTAACACAAAGCACCCAACT	96.0189	1.66457	0.538745	3.08971	0.00200352	0.0158729	hsa|mt-sRNA|Val|H|1602|tRF-5|31|8A22	hsa|mt-sRNA|Val|H|1602	tRF-5	normal_1_mismatch	Mt_tRNA	H	sense	Val	within gene boundary	1602	1632	1602	1670	8A22
CAGAGTGTTGCTTAACACAAAGCACCCAACTT	13.7341	2.3494	0.846677	2.77485	0.00552279	0.0364148	hsa|mt-sRNA|Val|H|1602|tRF-5|32|8A23	hsa|mt-sRNA|Val|H|1602	tRF-5	normal_1_mismatch	Mt_tRNA	H	sense	Val	within gene boundary	1602	1633	1602	1670	8A23
CAGAGTGTTGCTTAACACAAAGCACCCAACTTACACTTAGGAGA	15.1172	1.6711	0.695357	2.40322	0.0162513	0.0816157	hsa|mt-sRNA|Val|H|1602|tRF-5|44|8A35	hsa|mt-sRNA|Val|H|1602	tRF-5	normal_1_mismatch	Mt_tRNA	H	sense	Val	within gene boundary	1602	1645	1602	1670	8A35
CAGAGTGTAGCTTAACACAAAGCACCCC	28.5994	-3.2819	0.799234	-4.10631	4.02025e-05	0.000570653	hsa|mt-sRNA|Val|H|1602|tRF-5|28|27A0	hsa|mt-sRNA|Val|H|1602	tRF-5	normal_1_mismatch	Mt_tRNA	H	sense	Val	within gene boundary	1602	1629	1602	1670	27A0
CAGAGTGTAGCTTAACCCAAAGCACCC	27.8296	-8.63403	1.25129	-6.90008	5.19736e-12	2.41441e-10	hsa|mt-sRNA|Val|H|1602|tRF-5|27|16A10	hsa|mt-sRNA|Val|H|1602	tRF-5	normal_1_mismatch	Mt_tRNA	H	sense	Val	within gene boundary	1602	1628	1602	1670	16A10
CAGAGTGTAGCTTAACCCAAAGCACCCA	157.275	-10.4192	1.22025	-8.53857	1.35888e-17	2.31463e-15	hsa|mt-sRNA|Val|H|1602|tRF-5|28|16A11	hsa|mt-sRNA|Val|H|1602	tRF-5	normal_1_mismatch	Mt_tRNA	H	sense	Val	within gene boundary	1602	1629	1602	1670	16A11
CAGAGTGTAGCTTAACCCAAAGCACCCAA	20.7935	-8.20873	1.29169	-6.355	2.08421e-10	7.22055e-09	hsa|mt-sRNA|Val|H|1602|tRF-5|29|16A12	hsa|mt-sRNA|Val|H|1602	tRF-5	normal_1_mismatch	Mt_tRNA	H	sense	Val	within gene boundary	1602	1630	1602	1670	16A12
CAGAGTGTAGCTTACCACAAAGCACCCA	107.47	-10.5922	1.23604	-8.56943	1.04e-17	2.06889e-15	hsa|mt-sRNA|Val|H|1602|tRF-5|28|14A13	hsa|mt-sRNA|Val|H|1602	tRF-5	normal_1_mismatch	Mt_tRNA	H	sense	Val	within gene boundary	1602	1629	1602	1670	14A13
CAGAGTGTCGCTTAACACAAAGCACCCA	23.8218	1.82367	0.680812	2.67868	0.0073914	0.0448309	hsa|mt-sRNA|Val|H|1602|tRF-5|28|8A19	hsa|mt-sRNA|Val|H|1602	tRF-5	normal_1_mismatch	Mt_tRNA	H	sense	Val	within gene boundary	1602	1629	1602	1670	8A19
CAGAGTGTCGCTTAACACAAAGCACCCAACTTACACTTAGGAGATTTCAA	20.0824	2.15293	0.795922	2.70495	0.0068315	0.0426454	hsa|mt-sRNA|Val|H|1602|tRF-5|50|8A41	hsa|mt-sRNA|Val|H|1602	tRF-5	normal_1_mismatch	Mt_tRNA	H	sense	Val	within gene boundary	1602	1651	1602	1670	8A41
CAGAGTGTGGCTTAAC	48.0364	4.50327	0.990891	4.54467	5.50226e-06	9.14359e-05	hsa|mt-sRNA|Val|H|1602|tRF-5|16|8A7	hsa|mt-sRNA|Val|H|1602	tRF-5	normal_1_mismatch	Mt_tRNA	H	sense	Val	within gene boundary	1602	1617	1602	1670	8A7
CAGCGTGTAGCTTAACACAAAGCACCCA	39.7126	-4.43839	0.713665	-6.21915	4.99844e-10	1.57182e-08	hsa|mt-sRNA|Val|H|1602|tRF-5|28|3A24	hsa|mt-sRNA|Val|H|1602	tRF-5	normal_1_mismatch	Mt_tRNA	H	sense	Val	within gene boundary	1602	1629	1602	1670	3A24
CAGCTATCCATTGGTCT	60.2347	1.81106	0.729313	2.48324	0.0130193	0.0693007	hsa|mt-sRNA|Leu2|H|12281|i-tRF-5|17|	hsa|mt-sRNA|Leu2|H|12281	i-tRF-5	normal_1_mismatch	Mt_tRNA	H	sense	Leu2	within gene boundary	12281	12297	12266	12336
CAGCTCTCCATTGGTC	15.0503	6.99043	1.32276	5.28473	1.25887e-07	2.89116e-06	hsa|mt-sRNA|Leu2|H|12281|i-tRF-5|16|5A10	hsa|mt-sRNA|Leu2|H|12281	i-tRF-5	normal_1_mismatch	Mt_tRNA	H	sense	Leu2	within gene boundary	12281	12296	12266	12336	5A10
CATGGCTTTCTCACC	15.5362	2.09647	0.817101	2.56575	0.0102954	0.0591119	hsa|mt-sRNA|Ser2|H|12253|tRF-3|15|13A1	hsa|mt-sRNA|Ser2|H|12253	tRF-3	normal_1_mismatch	Mt_tRNA	H	sense	Ser2	within gene boundary	12253	12267	12207	12265	13A1
CCATTGGTCTTAGCCCC	20.6024	2.31128	0.825927	2.7984	0.00513565	0.0341931	hsa|mt-sRNA|Leu2|H|12288|i-tRF-5|17|13G3	hsa|mt-sRNA|Leu2|H|12288	i-tRF-5	normal_1_mismatch	Mt_tRNA	H	sense	Leu2	within gene boundary	12288	12304	12266	12336	13G3
CCGGAGATGAAAACC	28.1941	2.93416	0.734305	3.99584	6.44657e-05	0.000882813	hsa|mt-sRNA|Thr|H|15925|i-tRF-3|15|	hsa|mt-sRNA|Thr|H|15925	i-tRF-3	normal_1_mismatch	Mt_tRNA	H	sense	Thr	within gene boundary	15925	15939	15888	15953
CCGGAGATGAAAACCT	24.8761	1.83604	0.676967	2.71216	0.00668457	0.0421705	hsa|mt-sRNA|Thr|H|15925|i-tRF-3|16|	hsa|mt-sRNA|Thr|H|15925	i-tRF-3	normal_1_mismatch	Mt_tRNA	H	sense	Thr	within gene boundary	15925	15940	15888	15953
CGAATGATTTCGACT	15.2376	1.9352	0.805804	2.40157	0.0163247	0.0816157	hsa|mt-sRNA|Arg|H|10426|i-tRF-5|15|	hsa|mt-sRNA|Arg|H|10426	i-tRF-5	normal_1_mismatch	Mt_tRNA	H	sense	Arg	within gene boundary	10426	10440	10405	10469
CGGTAATCGCATAAAACTTAAAACTT	18.7384	-2.45092	0.70388	-3.48202	0.000497641	0.00496185	hsa|mt-sRNA|Leu|H|3247|i-tRF-5|26|	hsa|mt-sRNA|Leu|H|3247	i-tRF-5	normal_1_mismatch	Mt_tRNA	H	sense	Leu	within gene boundary	3247	3272	3230	3304
CGTAAGGTCAGCTAAATAAGCTATCGGGCCC	39.837	-6.45803	0.930105	-6.94333	3.82954e-12	2.00707e-10	hsa|mt-sRNA|Met|H|4402|tRF-5|31|0A30	hsa|mt-sRNA|Met|H|4402	tRF-5	normal_1_mismatch	Mt_tRNA	H	sense	Met	within gene boundary	4402	4432	4402	4469	0A30
CTAACAACATGGCTA	77.8141	2.15433	0.903669	2.38398	0.0171265	0.0839781	hsa|mt-sRNA|Ser2|H|12246|i-tRF-3|15|14T0	hsa|mt-sRNA|Ser2|H|12246	i-tRF-3	normal_1_mismatch	Mt_tRNA	H	sense	Ser2	within gene boundary	12246	12260	12207	12265	14T0
CTAACAACATGGCTT	33.2562	2.02794	0.749874	2.70438	0.00684329	0.0426454	hsa|mt-sRNA|Ser2|H|12246|i-tRF-3|15|	hsa|mt-sRNA|Ser2|H|12246	i-tRF-3	normal_1_mismatch	Mt_tRNA	H	sense	Ser2	within gene boundary	12246	12260	12207	12265
CTTGACCGCTCTGAC	22.3981	2.12741	0.768677	2.76763	0.0056466	0.0369925	hsa|mt-sRNA|Val|H|1657|tRF-3|15|14G0	hsa|mt-sRNA|Val|H|1657	tRF-3	normal_1_mismatch	Mt_tRNA	H	sense	Val	within gene boundary	1657	1671	1602	1670	14G0
CTTTTCAGTTAAAGATTAAGAGAACC	14.8202	6.22905	1.29796	4.79911	1.59376e-06	3.04453e-05	hsa|mt-sRNA|Lys|H|8321|i-tRF-5|26|5A20	hsa|mt-sRNA|Lys|H|8321	i-tRF-5	normal_1_mismatch	Mt_tRNA	H	sense	Lys	within gene boundary	8321	8346	8295	8364	5A20
GAAAATGTTTAGACGGGCTCACATCACCCCATA	13.9357	-1.98954	0.83459	-2.38385	0.0171325	0.0839781	hsa|mt-sRNA|Phe|H|611|i-tRF-5|33|	hsa|mt-sRNA|Phe|H|611	i-tRF-5	normal_1_mismatch	Mt_tRNA	H	sense	Phe	within gene boundary	611	643	577	647
GAAAACGTCATGGAGGC	8.00149	6.10169	1.30594	4.67226	2.97907e-06	5.45246e-05	hsa|mt-sRNA|Ser1|L|7498|tRF-5|17|11T5	hsa|mt-sRNA|Ser1|L|7498	tRF-5	normal_1_mismatch	Mt_tRNA	L	sense	Ser1	within gene boundary	7498	7514	7446	7514	11T5
GAAAACGTCATGGAGGCC	8.06631	6.11635	1.3431	4.55392	5.2655e-06	8.82188e-05	hsa|mt-sRNA|Ser1|L|7497|tRF-5|18|12T5	hsa|mt-sRNA|Ser1|L|7497	tRF-5	normal_1_mismatch	Mt_tRNA	L	sense	Ser1	within gene boundary	7497	7514	7446	7514	12T5
GAAATACAACGATGGTTTTTCATATCATTGGTCGTGGTTGTAGTCCGTGC	36.4297	-2.11817	0.736728	-2.8751	0.00403897	0.0282728	hsa|mt-sRNA|Glu|L|14681|i-tRF-3|50|	hsa|mt-sRNA|Glu|L|14681	i-tRF-3	normal_1_mismatch	Mt_tRNA	L	sense	Glu	within gene boundary	14681	14730	14674	14742
GAACTGCTAACTCATGCCCCCATGTCTAACAACATGGCTTTCTCACC	45.172	1.646	0.704553	2.33623	0.0194792	0.0928078	hsa|mt-sRNA|Ser2|H|12221|tRF-3|47|45A1	hsa|mt-sRNA|Ser2|H|12221	tRF-3	normal_1_mismatch	Mt_tRNA	H	sense	Ser2	within gene boundary	12221	12267	12207	12265	45A1
GAATGTTTAGACGGGCT	203.681	1.94797	0.730302	2.66735	0.00764512	0.0459606	hsa|mt-sRNA|Phe|H|613|i-tRF-3|17|0A16	hsa|mt-sRNA|Phe|H|613	i-tRF-3	normal_1_mismatch	Mt_tRNA	H	sense	Phe	within gene boundary	613	629	577	647	0A16
GAATGTTTAGACGGGCTC	1667.13	2.67872	0.82854	3.23306	0.0012247	0.010474	hsa|mt-sRNA|Phe|H|613|i-tRF-3|18|0A17	hsa|mt-sRNA|Phe|H|613	i-tRF-3	normal_1_mismatch	Mt_tRNA	H	sense	Phe	within gene boundary	613	630	577	647	0A17
GAATGTTTAGACGGGCTCACATCACCCCATA	66.4951	-1.86652	0.665749	-2.80364	0.00505291	0.0338628	hsa|mt-sRNA|Phe|H|613|i-tRF-3|31|0A30	hsa|mt-sRNA|Phe|H|613	i-tRF-3	normal_1_mismatch	Mt_tRNA	H	sense	Phe	within gene boundary	613	643	577	647	0A30
GACGGGCTCACATCACC	24.4399	2.34091	0.663421	3.52855	0.000417848	0.00435756	hsa|mt-sRNA|Phe|H|622|i-tRF-3|17|	hsa|mt-sRNA|Phe|H|622	i-tRF-3	normal_1_mismatch	Mt_tRNA	H	sense	Phe	within gene boundary	622	638	577	647
GAGAAAGCTCACAAGAACTG	3058.95	-1.58856	0.627965	-2.5297	0.0114161	0.0634091	hsa|mt-sRNA|Ser2|H|12207|tRF-5|20|	hsa|mt-sRNA|Ser2|H|12207	tRF-5	normal_1_mismatch	Mt_tRNA	H	sense	Ser2	within gene boundary	12207	12226	12207	12265
GAGAACGCTCACAAGAACTGCTAACT	314.18	8.23142	0.921611	8.93155	4.20069e-19	1.2266e-16	hsa|mt-sRNA|Ser2|H|12207|tRF-5|26|5A20	hsa|mt-sRNA|Ser2|H|12207	tRF-5	normal_1_mismatch	Mt_tRNA	H	sense	Ser2	within gene boundary	12207	12232	12207	12265	5A20
GAGAACGCTCACAAGAACTGCTAACTC	157.854	7.01094	0.886661	7.90712	2.63403e-15	2.69198e-13	hsa|mt-sRNA|Ser2|H|12207|tRF-5|27|5A21	hsa|mt-sRNA|Ser2|H|12207	tRF-5	normal_1_mismatch	Mt_tRNA	H	sense	Ser2	within gene boundary	12207	12233	12207	12265	5A21
GAGAACGCTCACAAGAACTGCTAACTCATGCC	45.1863	8.58673	1.28939	6.65953	2.74707e-11	1.07981e-09	hsa|mt-sRNA|Ser2|H|12207|tRF-5|32|5A26	hsa|mt-sRNA|Ser2|H|12207	tRF-5	normal_1_mismatch	Mt_tRNA	H	sense	Ser2	within gene boundary	12207	12238	12207	12265	5A26
GAGAACGCTCACAAGAACTGCTAACTCATGCCCCCATGTCTAACAACATG	14.8782	6.98234	1.23214	5.66685	1.45447e-08	3.86096e-07	hsa|mt-sRNA|Ser2|H|12207|tRF-5|50|5A44	hsa|mt-sRNA|Ser2|H|12207	tRF-5	normal_1_mismatch	Mt_tRNA	H	sense	Ser2	within gene boundary	12207	12256	12207	12265	5A44
GAGACAGCTCACAAGAACTG	30.0447	-8.76684	1.25262	-6.99881	2.58142e-12	1.42606e-10	hsa|mt-sRNA|Ser2|H|12207|tRF-5|20|4A15	hsa|mt-sRNA|Ser2|H|12207	tRF-5	normal_1_mismatch	Mt_tRNA	H	sense	Ser2	within gene boundary	12207	12226	12207	12265	4A15
GAGAGTGTAGCTTAACACAAAGCACCCA	37.917	-6.16981	0.903347	-6.82994	8.49502e-12	3.61746e-10	hsa|mt-sRNA|Val|H|1602|tRF-5|28|0C27	hsa|mt-sRNA|Val|H|1602	tRF-5	normal_1_mismatch	Mt_tRNA	H	sense	Val	within gene boundary	1602	1629	1602	1670	0C27
GAGAAAGCTCACAAGACCTG	309.274	-12.1194	1.2243	-9.89906	4.20226e-23	4.29471e-20	hsa|mt-sRNA|Ser2|H|12207|tRF-5|20|16A3	hsa|mt-sRNA|Ser2|H|12207	tRF-5	normal_1_mismatch	Mt_tRNA	H	sense	Ser2	within gene boundary	12207	12226	12207	12265	16A3
GAGAAAGCTCACAAGACCTGCT	65.9821	-9.1707	1.19967	-7.64438	2.0995e-14	1.71655e-12	hsa|mt-sRNA|Ser2|H|12207|tRF-5|22|16A5	hsa|mt-sRNA|Ser2|H|12207	tRF-5	normal_1_mismatch	Mt_tRNA	H	sense	Ser2	within gene boundary	12207	12228	12207	12265	16A5
GAGAAAGCTCACAAGACCTGCTAACT	188.712	-11.4071	1.20352	-9.47811	2.58924e-21	1.73987e-18	hsa|mt-sRNA|Ser2|H|12207|tRF-5|26|16A9	hsa|mt-sRNA|Ser2|H|12207	tRF-5	normal_1_mismatch	Mt_tRNA	H	sense	Ser2	within gene boundary	12207	12232	12207	12265	16A9
GAGAAAGCTCACAAGACCTGCTAACTC	127.238	-10.8368	1.20932	-8.961	3.2175e-19	1.09609e-16	hsa|mt-sRNA|Ser2|H|12207|tRF-5|27|16A10	hsa|mt-sRNA|Ser2|H|12207	tRF-5	normal_1_mismatch	Mt_tRNA	H	sense	Ser2	within gene boundary	12207	12233	12207	12265	16A10
GAGAAAGCTCACAAGACCTGCTAACTCATGCC	34.9342	-8.96345	1.29429	-6.92537	4.34836e-12	2.1162e-10	hsa|mt-sRNA|Ser2|H|12207|tRF-5|32|16A15	hsa|mt-sRNA|Ser2|H|12207	tRF-5	normal_1_mismatch	Mt_tRNA	H	sense	Ser2	within gene boundary	12207	12238	12207	12265	16A15
GAGAACGCTCACAAGAAC	32.1218	6.67341	1.20071	5.5579	2.73038e-08	6.97613e-07	hsa|mt-sRNA|Ser2|H|12207|tRF-5|18|5A12	hsa|mt-sRNA|Ser2|H|12207	tRF-5	normal_1_mismatch	Mt_tRNA	H	sense	Ser2	within gene boundary	12207	12224	12207	12265	5A12
GAGAACGCTCACAAGAACT	31.1052	7.33132	1.22676	5.97617	2.28446e-09	6.67062e-08	hsa|mt-sRNA|Ser2|H|12207|tRF-5|19|5A13	hsa|mt-sRNA|Ser2|H|12207	tRF-5	normal_1_mismatch	Mt_tRNA	H	sense	Ser2	within gene boundary	12207	12225	12207	12265	5A13
GAGAACGCTCACAAGAACTG	169.68	6.38248	0.771681	8.27088	1.32975e-16	1.81201e-14	hsa|mt-sRNA|Ser2|H|12207|tRF-5|20|5A14	hsa|mt-sRNA|Ser2|H|12207	tRF-5	normal_1_mismatch	Mt_tRNA	H	sense	Ser2	within gene boundary	12207	12226	12207	12265	5A14
GAGAACGCTCACAAGAACTGC	19.3393	5.90173	1.14828	5.13964	2.75265e-07	6.04992e-06	hsa|mt-sRNA|Ser2|H|12207|tRF-5|21|5A15	hsa|mt-sRNA|Ser2|H|12207	tRF-5	normal_1_mismatch	Mt_tRNA	H	sense	Ser2	within gene boundary	12207	12227	12207	12265	5A15
GAGAACGCTCACAAGAACTGCT	101.616	8.37474	1.12336	7.45506	8.98276e-14	6.33129e-12	hsa|mt-sRNA|Ser2|H|12207|tRF-5|22|5A16	hsa|mt-sRNA|Ser2|H|12207	tRF-5	normal_1_mismatch	Mt_tRNA	H	sense	Ser2	within gene boundary	12207	12228	12207	12265	5A16
GAGAACGCTCACAAGAACTGCTAAC	21.2911	6.77404	1.24115	5.45786	4.81906e-08	1.17264e-06	hsa|mt-sRNA|Ser2|H|12207|tRF-5|25|5A19	hsa|mt-sRNA|Ser2|H|12207	tRF-5	normal_1_mismatch	Mt_tRNA	H	sense	Ser2	within gene boundary	12207	12231	12207	12265	5A19
GAGCAAGCTCACAAGAACTG	140.725	-9.62659	1.18506	-8.12331	4.53646e-16	5.1514e-14	hsa|mt-sRNA|Ser2|H|12207|tRF-5|20|3A16	hsa|mt-sRNA|Ser2|H|12207	tRF-5	normal_1_mismatch	Mt_tRNA	H	sense	Ser2	within gene boundary	12207	12226	12207	12265	3A16
GAGCAAGCTCACAAGAACTGCT	26.8342	-7.87321	1.21015	-6.50599	7.7184e-11	2.92156e-09	hsa|mt-sRNA|Ser2|H|12207|tRF-5|22|3A18	hsa|mt-sRNA|Ser2|H|12207	tRF-5	normal_1_mismatch	Mt_tRNA	H	sense	Ser2	within gene boundary	12207	12228	12207	12265	3A18
GAGCAAGCTCACAAGAACTGCTAACT	68.2456	-6.25893	0.830758	-7.53399	4.92116e-14	3.59245e-12	hsa|mt-sRNA|Ser2|H|12207|tRF-5|26|3A22	hsa|mt-sRNA|Ser2|H|12207	tRF-5	normal_1_mismatch	Mt_tRNA	H	sense	Ser2	within gene boundary	12207	12232	12207	12265	3A22
GAGCAAGCTCACAAGAACTGCTAACTC	52.6223	-8.09518	1.15303	-7.02078	2.2063e-12	1.25269e-10	hsa|mt-sRNA|Ser2|H|12207|tRF-5|27|3A23	hsa|mt-sRNA|Ser2|H|12207	tRF-5	normal_1_mismatch	Mt_tRNA	H	sense	Ser2	within gene boundary	12207	12233	12207	12265	3A23
GAGTGCAGCATTGGAC	41.443	8.45848	1.36184	6.21105	5.26333e-10	1.63004e-08	hsa|mt-sRNA|Tyr|L|5864|i-tRF-5|16|10T5	hsa|mt-sRNA|Tyr|L|5864	i-tRF-5	normal_1_mismatch	Mt_tRNA	L	sense	Tyr	within gene boundary	5864	5879	5826	5891	10T5
GAGTGCAGCATTGGACT	9.93274	6.3914	1.385	4.61474	3.93597e-06	6.99576e-05	hsa|mt-sRNA|Tyr|L|5863|i-tRF-5|17|11T5	hsa|mt-sRNA|Tyr|L|5863	i-tRF-5	normal_1_mismatch	Mt_tRNA	L	sense	Tyr	within gene boundary	5863	5879	5826	5891	11T5
GAGTGCAGCATTGGACTGTA	54.9074	8.15009	1.35255	6.02573	1.68353e-09	4.98716e-08	hsa|mt-sRNA|Tyr|L|5860|i-tRF-5|20|14T5	hsa|mt-sRNA|Tyr|L|5860	i-tRF-5	normal_1_mismatch	Mt_tRNA	L	sense	Tyr	within gene boundary	5860	5879	5826	5891	14T5
GCCCCCATGTCTAACAACATGGCT	28.9575	-2.83326	0.827871	-3.42235	0.000620829	0.00598573	hsa|mt-sRNA|Ser2|H|12236|i-tRF-3|24|	hsa|mt-sRNA|Ser2|H|12236	i-tRF-3	normal_1_mismatch	Mt_tRNA	H	sense	Ser2	within gene boundary	12236	12259	12207	12265
GCCCCCATGTCTAACAACATGGCTA	40.6521	-2.38662	0.874888	-2.72792	0.00637355	0.0406125	hsa|mt-sRNA|Ser2|H|12236|i-tRF-3|25|24T0	hsa|mt-sRNA|Ser2|H|12236	i-tRF-3	normal_1_mismatch	Mt_tRNA	H	sense	Ser2	within gene boundary	12236	12260	12207	12265	24T0
GCCCCCATGTCTAACAACATGGCTT	21.7574	-2.27945	0.853038	-2.67215	0.00753669	0.0455769	hsa|mt-sRNA|Ser2|H|12236|i-tRF-3|25|	hsa|mt-sRNA|Ser2|H|12236	i-tRF-3	normal_1_mismatch	Mt_tRNA	H	sense	Ser2	within gene boundary	12236	12260	12207	12265
GCCCCCATGTCTAACAACATGGCTTTCTCA	5.7056	-4.27211	1.33922	-3.19	0.00142274	0.0120168	hsa|mt-sRNA|Ser2|H|12236|tRH-3|30|	hsa|mt-sRNA|Ser2|H|12236	tRNA-half-3	normal_1_mismatch	Mt_tRNA	H	sense	Ser2	within gene boundary	12236	12265	12207	12265
GCCCCCATGTCTAACAACATGGCTTTCTCACC	50.7252	-2.02483	0.748488	-2.70522	0.00682588	0.0426454	hsa|mt-sRNA|Ser2|H|12236|tRF-3|32|30A1	hsa|mt-sRNA|Ser2|H|12236	tRF-3	normal_1_mismatch	Mt_tRNA	H	sense	Ser2	within gene boundary	12236	12267	12207	12265	30A1
GCTATCCATTGGTCT	45.789	3.43331	0.824365	4.16479	3.1164e-05	0.000451768	hsa|mt-sRNA|Leu2|H|12283|i-tRF-5|15|	hsa|mt-sRNA|Leu2|H|12283	i-tRF-5	normal_1_mismatch	Mt_tRNA	H	sense	Leu2	within gene boundary	12283	12297	12266	12336
GGAAAAATGGCTGAGTGAAGCATTGGACTGTA	68.6335	-6.37045	0.839775	-7.5859	3.30196e-14	2.59585e-12	hsa|mt-sRNA|Tyr|L|5860|tRF-5|32|29A2	hsa|mt-sRNA|Tyr|L|5860	tRF-5	normal_1_mismatch	Mt_tRNA	L	sense	Tyr	within gene boundary	5860	5891	5826	5891	29A2
GGCAAAATGGCTGAGTGAAGCATTGGACTGTA	30.3318	-5.50433	0.872584	-6.30808	2.82516e-10	9.38003e-09	hsa|mt-sRNA|Tyr|L|5860|tRF-5|32|29A2	hsa|mt-sRNA|Tyr|L|5860	tRF-5	normal_1_mismatch	Mt_tRNA	L	sense	Tyr	within gene boundary	5860	5891	5826	5891	29A2
GGACTATGAGAATCGACCCCATCCCTGAGAATCCAAAATTCTCCGTGCCA	74.1151	-9.32808	1.26499	-7.37405	1.65525e-13	1.0914e-11	hsa|mt-sRNA|Gln|H|as4332|tRF-5|50|16A33	hsa|mt-sRNA|Gln|H|as4332	tRF-5	normal_1_mismatch	Mt_tRNA	H	anti-sense	Gln	within gene boundary	4332	4381	4329	4400	16A33
GGACTCTGAGAATCGAACCCATCCCTGAGAATCCAAAATTCTCCGTG	2.78591	4.53912	1.61244	2.81507	0.00487673	0.0331164	hsa|mt-sRNA|Gln|H|as4332|tRF-5|47|5A41	hsa|mt-sRNA|Gln|H|as4332	tRF-5	normal_1_mismatch	Mt_tRNA	H	anti-sense	Gln	within gene boundary	4332	4378	4329	4400	5A41
GGGAAAATGGCTGAGTGAAGCATTGGACTGTA	93.3995	-7.51029	0.933877	-8.04206	8.83432e-16	9.50387e-14	hsa|mt-sRNA|Tyr|L|5860|tRF-5|32|29A2	hsa|mt-sRNA|Tyr|L|5860	tRF-5	normal_1_mismatch	Mt_tRNA	L	sense	Tyr	within gene boundary	5860	5891	5826	5891	29A2
GGTAAACTGGCTGAGTGAAGCATTGGACTGTA	319.85	-10.759	1.17902	-9.12537	7.14921e-20	2.9226e-17	hsa|mt-sRNA|Tyr|L|5860|tRF-5|32|25T6	hsa|mt-sRNA|Tyr|L|5860	tRF-5	normal_1_mismatch	Mt_tRNA	L	sense	Tyr	within gene boundary	5860	5891	5826	5891	25T6
GGTAACATGGCTGAGTGAAGCATTGGAC	8.24537	4.56833	1.20238	3.7994	0.000145047	0.00181888	hsa|mt-sRNA|Tyr|L|5864|tRF-5|28|22T5	hsa|mt-sRNA|Tyr|L|5864	tRF-5	normal_1_mismatch	Mt_tRNA	L	sense	Tyr	within gene boundary	5864	5891	5826	5891	22T5
GGTAACATGGCTGAGTGAAGCATTGGACT	11.6359	6.63799	1.26443	5.2498	1.52266e-07	3.45813e-06	hsa|mt-sRNA|Tyr|L|5863|tRF-5|29|23T5	hsa|mt-sRNA|Tyr|L|5863	tRF-5	normal_1_mismatch	Mt_tRNA	L	sense	Tyr	within gene boundary	5863	5891	5826	5891	23T5
GGTAACATGGCTGAGTGAAGCATTGGACTGTA	292.187	7.17048	0.826375	8.67704	4.06219e-18	9.22568e-16	hsa|mt-sRNA|Tyr|L|5860|tRF-5|32|26T5	hsa|mt-sRNA|Tyr|L|5860	tRF-5	normal_1_mismatch	Mt_tRNA	L	sense	Tyr	within gene boundary	5860	5891	5826	5891	26T5
GGTCAAATGGCTGAGTGAAGCATTGGACTGTA	164.411	-10.4819	1.23966	-8.45547	2.77962e-17	4.15557e-15	hsa|mt-sRNA|Tyr|L|5860|tRF-5|32|28T3	hsa|mt-sRNA|Tyr|L|5860	tRF-5	normal_1_mismatch	Mt_tRNA	L	sense	Tyr	within gene boundary	5860	5891	5826	5891	28T3
GGTAAGGTCAGCTAAATAAGCTATCGGGCCC	40.4074	-4.20114	0.76133	-5.51815	3.42586e-08	8.64501e-07	hsa|mt-sRNA|Met|H|4402|tRF-5|31|0A30	hsa|mt-sRNA|Met|H|4402	tRF-5	normal_1_mismatch	Mt_tRNA	H	sense	Met	within gene boundary	4402	4432	4402	4469	0A30
GGTACAATGGCTGAGTGAAGCATTGGACTGTA	35.7115	-8.99129	1.30605	-6.88433	5.80608e-12	2.57992e-10	hsa|mt-sRNA|Tyr|L|5860|tRF-5|32|27T4	hsa|mt-sRNA|Tyr|L|5860	tRF-5	normal_1_mismatch	Mt_tRNA	L	sense	Tyr	within gene boundary	5860	5891	5826	5891	27T4
GTCCTTGTTGTATAAAC	490.222	1.5278	0.618018	2.47209	0.0134324	0.0712385	hsa|mt-sRNA|Thr|H|15888|tRF-5|17|8A8	hsa|mt-sRNA|Thr|H|15888	tRF-5	normal_1_mismatch	Mt_tRNA	H	sense	Thr	within gene boundary	15888	15904	15888	15953	8A8
GTCCTTGTTGTATAAACTAATACACCAG	32.483	2.57984	0.908942	2.83829	0.00453559	0.0311099	hsa|mt-sRNA|Thr|H|15888|tRF-5|28|8A19	hsa|mt-sRNA|Thr|H|15888	tRF-5	normal_1_mismatch	Mt_tRNA	H	sense	Thr	within gene boundary	15888	15915	15888	15953	8A19
GTCCTTGTCGTATAAAC	20.8979	1.78568	0.661862	2.69797	0.00697643	0.042949	hsa|mt-sRNA|Thr|H|15888|tRF-5|17|8A8	hsa|mt-sRNA|Thr|H|15888	tRF-5	normal_1_mismatch	Mt_tRNA	H	sense	Thr	within gene boundary	15888	15904	15888	15953	8A8
GTCCTTGTGGTATAAAC	223.138	1.87839	0.63288	2.96801	0.00299736	0.0221978	hsa|mt-sRNA|Thr|H|15888|tRF-5|17|8A8	hsa|mt-sRNA|Thr|H|15888	tRF-5	normal_1_mismatch	Mt_tRNA	H	sense	Thr	within gene boundary	15888	15904	15888	15953	8A8
GTGAAAGCTCACAAGAACTG	26.7687	-7.23433	1.18815	-6.08875	1.13798e-09	3.4717e-08	hsa|mt-sRNA|Ser2|H|12207|tRF-5|20|1A18	hsa|mt-sRNA|Ser2|H|12207	tRF-5	normal_1_mismatch	Mt_tRNA	H	sense	Ser2	within gene boundary	12207	12226	12207	12265	1A18
GTTAAATTATAGGCT	32.4147	3.33172	1.06525	3.12765	0.00176211	0.0141802	hsa|mt-sRNA|Asp|H|7554|i-tRF-3|15|	hsa|mt-sRNA|Asp|H|7554	i-tRF-3	normal_1_mismatch	Mt_tRNA	H	sense	Asp	within gene boundary	7554	7568	7518	7585
GTTAAGATGGCAGAGCC	328.763	1.87814	0.772105	2.4325	0.0149951	0.0772039	hsa|mt-sRNA|Leu|H|3230|tRF-5|17|	hsa|mt-sRNA|Leu|H|3230	tRF-5	normal_1_mismatch	Mt_tRNA	H	sense	Leu	within gene boundary	3230	3246	3230	3304
GTTAAGATGGCAGAGCCCG	45.8544	2.23304	0.685905	3.25561	0.00113148	0.0099687	hsa|mt-sRNA|Leu|H|3230|tRF-5|19|	hsa|mt-sRNA|Leu|H|3230	tRF-5	normal_1_mismatch	Mt_tRNA	H	sense	Leu	within gene boundary	3230	3248	3230	3304
GTTAAGATGGCAGAGCCCGG	118.751	3.75297	0.850406	4.41316	1.01874e-05	0.000161418	hsa|mt-sRNA|Leu|H|3230|tRF-5|20|	hsa|mt-sRNA|Leu|H|3230	tRF-5	normal_1_mismatch	Mt_tRNA	H	sense	Leu	within gene boundary	3230	3249	3230	3304
GTTAAGATGGCAGAGCCCGGT	132.366	3.97734	0.872106	4.56062	5.10035e-06	8.6876e-05	hsa|mt-sRNA|Leu|H|3230|tRF-5|21|	hsa|mt-sRNA|Leu|H|3230	tRF-5	normal_1_mismatch	Mt_tRNA	H	sense	Leu	within gene boundary	3230	3250	3230	3304
GTTAAGATGGCAGAGCCCGGTA	41.6644	3.05096	0.655684	4.6531	3.26983e-06	5.91463e-05	hsa|mt-sRNA|Leu|H|3230|tRF-5|22|	hsa|mt-sRNA|Leu|H|3230	tRF-5	normal_1_mismatch	Mt_tRNA	H	sense	Leu	within gene boundary	3230	3251	3230	3304
GTTAAGATGGCAGAGCCCGGTAA	71.4513	3.73717	0.81918	4.56209	5.06479e-06	8.6876e-05	hsa|mt-sRNA|Leu|H|3230|tRF-5|23|	hsa|mt-sRNA|Leu|H|3230	tRF-5	normal_1_mismatch	Mt_tRNA	H	sense	Leu	within gene boundary	3230	3252	3230	3304
GTTAAGATGGCAGAGCCCGGTAAT	15.3045	1.76139	0.727557	2.42097	0.0154792	0.0789338	hsa|mt-sRNA|Leu|H|3230|tRF-5|24|	hsa|mt-sRNA|Leu|H|3230	tRF-5	normal_1_mismatch	Mt_tRNA	H	sense	Leu	within gene boundary	3230	3253	3230	3304
GTTAAGATGGCAGAGCCCGGTAATC	25.3074	2.18413	0.709016	3.08051	0.00206645	0.0162455	hsa|mt-sRNA|Leu|H|3230|tRF-5|25|	hsa|mt-sRNA|Leu|H|3230	tRF-5	normal_1_mismatch	Mt_tRNA	H	sense	Leu	within gene boundary	3230	3254	3230	3304
GTTAAGATGGCAGAGCCCGGTAATCGCATAAAACTTA	200.718	1.48138	0.630978	2.34775	0.0188869	0.0914809	hsa|mt-sRNA|Leu|H|3230|tRH-5|37|	hsa|mt-sRNA|Leu|H|3230	tRNA-half-5	normal_1_mismatch	Mt_tRNA	H	sense	Leu	within gene boundary	3230	3266	3230	3304
GTTAAGATTGCAGAGCC	35.7972	1.83556	0.71907	2.55268	0.0106897	0.0609725	hsa|mt-sRNA|Leu|H|3230|tRF-5|17|8G8	hsa|mt-sRNA|Leu|H|3230	tRF-5	normal_1_mismatch	Mt_tRNA	H	sense	Leu	within gene boundary	3230	3246	3230	3304	8G8
GTTAAGCTGGCAGAGCCC	31.6003	-6.76773	1.23854	-5.46427	4.64823e-08	1.1447e-06	hsa|mt-sRNA|Leu|H|3230|tRF-5|18|6A11	hsa|mt-sRNA|Leu|H|3230	tRF-5	normal_1_mismatch	Mt_tRNA	H	sense	Leu	within gene boundary	3230	3247	3230	3304	6A11
GTTAAGCTGGCAGAGCCCGGTAATCGCATAAAACTTAAAACT	25.4798	-8.52964	1.31569	-6.48303	8.99001e-11	3.34102e-09	hsa|mt-sRNA|Leu|H|3230|tRF-5|42|6A35	hsa|mt-sRNA|Leu|H|3230	tRF-5	normal_1_mismatch	Mt_tRNA	H	sense	Leu	within gene boundary	3230	3271	3230	3304	6A35
GTTAAGATGGCAGAGCCCGGTAATCGCATAAAACTTAAAACTTTAC	21.3929	2.01707	0.84063	2.39947	0.0164187	0.0818534	hsa|mt-sRNA|Leu|H|3230|tRF-5|46|	hsa|mt-sRNA|Leu|H|3230	tRF-5	normal_1_mismatch	Mt_tRNA	H	sense	Leu	within gene boundary	3230	3275	3230	3304
GTTAAGATGGCAGAGCCCGGTAATCGCATAAACCTTA	12.5359	6.73406	1.24936	5.39001	7.04537e-08	1.6745e-06	hsa|mt-sRNA|Leu|H|3230|tRH-5|37|32A4	hsa|mt-sRNA|Leu|H|3230	tRNA-half-5	normal_1_mismatch	Mt_tRNA	H	sense	Leu	within gene boundary	3230	3266	3230	3304	32A4
GTTAAGATGGCAGAGCCCGGTAATCGCATAAACCTTAAAACT	20.7974	6.02368	1.12895	5.33564	9.52079e-08	2.21142e-06	hsa|mt-sRNA|Leu|H|3230|tRF-5|42|32A9	hsa|mt-sRNA|Leu|H|3230	tRF-5	normal_1_mismatch	Mt_tRNA	H	sense	Leu	within gene boundary	3230	3271	3230	3304	32A9
GTTCTTGTAGTTGAAATACAACG	34.7574	-2.58918	0.859114	-3.01378	0.00258011	0.0194603	hsa|mt-sRNA|Glu|L|14720|tRF-5|23|	hsa|mt-sRNA|Glu|L|14720	tRF-5	normal_1_mismatch	Mt_tRNA	L	sense	Glu	within gene boundary	14720	14742	14674	14742
GTTCTTGTCGTTGAAATACAACGATGGTTTTTCATATCATTGGTCGTGGT	10.5657	2.7988	0.858487	3.26016	0.00111351	0.00989569	hsa|mt-sRNA|Glu|L|14693|tRF-5|50|41T8	hsa|mt-sRNA|Glu|L|14693	tRF-5	normal_1_mismatch	Mt_tRNA	L	sense	Glu	within gene boundary	14693	14742	14674	14742	41T8
GTTCTTGTGGTTGAAAT	27.1531	4.43631	1.11819	3.96742	7.26556e-05	0.000958116	hsa|mt-sRNA|Glu|L|14726|tRF-5|17|8T8	hsa|mt-sRNA|Glu|L|14726	tRF-5	normal_1_mismatch	Mt_tRNA	L	sense	Glu	within gene boundary	14726	14742	14674	14742	8T8
GTTCTTGTTGTTGAAATACAACG	38.0306	-2.13693	0.86659	-2.4659	0.0136669	0.0719976	hsa|mt-sRNA|Glu|L|14720|tRF-5|23|14T8	hsa|mt-sRNA|Glu|L|14720	tRF-5	normal_1_mismatch	Mt_tRNA	L	sense	Glu	within gene boundary	14720	14742	14674	14742	14T8
GTTCTTGTTGTTGAAATACAACGATGGTTTTTC	119.76	2.32662	0.931249	2.49838	0.0124761	0.0672853	hsa|mt-sRNA|Glu|L|14710|tRF-5|33|24T8	hsa|mt-sRNA|Glu|L|14710	tRF-5	normal_1_mismatch	Mt_tRNA	L	sense	Glu	within gene boundary	14710	14742	14674	14742	24T8
GTTCTTGTTGTTGAAATACAACGATGGTTTTTCATATCAT	31.5511	-1.81724	0.603639	-3.01048	0.00260839	0.0196013	hsa|mt-sRNA|Glu|L|14703|tRF-5|40|31T8	hsa|mt-sRNA|Glu|L|14703	tRF-5	normal_1_mismatch	Mt_tRNA	L	sense	Glu	within gene boundary	14703	14742	14674	14742	31T8
GTTGTATTTCAACTACAAGAACACCA	97.4966	-2.48888	0.716366	-3.47431	0.000512161	0.00508183	hsa|mt-sRNA|Glu|H|as14721|i-tRF-3|26|	hsa|mt-sRNA|Glu|H|as14721	i-tRF-3	normal_1_mismatch	Mt_tRNA	H	anti-sense	Glu	within gene boundary	14721	14746	14674	14742
GTTCTTGTGGTTGAAATACAACGATGGTTTTTC	29.4854	2.60165	0.964451	2.69754	0.00698533	0.042949	hsa|mt-sRNA|Glu|L|14710|tRF-5|33|24T8	hsa|mt-sRNA|Glu|L|14710	tRF-5	normal_1_mismatch	Mt_tRNA	L	sense	Glu	within gene boundary	14710	14742	14674	14742	24T8
GTTCTTGTGGTTGAAATACAACGATGGTTTTTCATATCATTGGTCGTGGT	116.563	1.83874	0.689041	2.66855	0.00761803	0.0459329	hsa|mt-sRNA|Glu|L|14693|tRF-5|50|41T8	hsa|mt-sRNA|Glu|L|14693	tRF-5	normal_1_mismatch	Mt_tRNA	L	sense	Glu	within gene boundary	14693	14742	14674	14742	41T8
GTTCTTGTTGTTGAAAT	58.8096	3.78928	1.03597	3.65772	0.000254465	0.00292206	hsa|mt-sRNA|Glu|L|14726|tRF-5|17|8T8	hsa|mt-sRNA|Glu|L|14726	tRF-5	normal_1_mismatch	Mt_tRNA	L	sense	Glu	within gene boundary	14726	14742	14674	14742	8T8
GTTGTCTTTCAACTACAAGAACACC	2.48653	4.43587	1.5038	2.94978	0.00318003	0.0233812	hsa|mt-sRNA|Glu|H|as14721|tRF-3|25|5A19	hsa|mt-sRNA|Glu|H|as14721	tRF-3	normal_1_mismatch	Mt_tRNA	H	anti-sense	Glu	within gene boundary	14721	14745	14674	14742	5A19
GTTGTCTTTCAACTACAAGAACACCA	5.79821	4.82184	1.281	3.76413	0.00016713	0.00205792	hsa|mt-sRNA|Glu|H|as14721|i-tRF-3|26|5A20	hsa|mt-sRNA|Glu|H|as14721	i-tRF-3	normal_1_mismatch	Mt_tRNA	H	anti-sense	Glu	within gene boundary	14721	14746	14674	14742	5A20
GTTTAGACGGGCTCA	214.849	3.52757	0.732137	4.81818	1.44874e-06	2.79362e-05	hsa|mt-sRNA|Phe|H|617|i-tRF-3|15|	hsa|mt-sRNA|Phe|H|617	i-tRF-3	normal_1_mismatch	Mt_tRNA	H	sense	Phe	within gene boundary	617	631	577	647
GTTTAGACGGGCTCAC	694.12	3.15779	0.70244	4.49546	6.94209e-06	0.000112616	hsa|mt-sRNA|Phe|H|617|i-tRF-3|16|	hsa|mt-sRNA|Phe|H|617	i-tRF-3	normal_1_mismatch	Mt_tRNA	H	sense	Phe	within gene boundary	617	632	577	647
GTTTAGACGGGCTCACA	181.351	2.50804	0.705331	3.55583	0.000376788	0.00405345	hsa|mt-sRNA|Phe|H|617|i-tRF-3|17|	hsa|mt-sRNA|Phe|H|617	i-tRF-3	normal_1_mismatch	Mt_tRNA	H	sense	Phe	within gene boundary	617	633	577	647
GTTTAGACGGGCTCACAT	72.2017	2.65741	0.758185	3.50496	0.000456677	0.00462103	hsa|mt-sRNA|Phe|H|617|i-tRF-3|18|	hsa|mt-sRNA|Phe|H|617	i-tRF-3	normal_1_mismatch	Mt_tRNA	H	sense	Phe	within gene boundary	617	634	577	647
GTTTATGTTGCTTACCT	11.2393	1.94731	0.773	2.51915	0.0117637	0.064464	hsa|mt-sRNA|Phe|H|577|tRF-5|17|8A8	hsa|mt-sRNA|Phe|H|577	tRF-5	normal_1_mismatch	Mt_tRNA	H	sense	Phe	within gene boundary	577	593	577	647	8A8
GTTTATGTTGCTTACCTC	15.7508	2.89618	0.878876	3.29532	0.00098309	0.00905152	hsa|mt-sRNA|Phe|H|577|tRF-5|18|8A9	hsa|mt-sRNA|Phe|H|577	tRF-5	normal_1_mismatch	Mt_tRNA	H	sense	Phe	within gene boundary	577	594	577	647	8A9
GTTTATGTAGCTTACC	75.0736	2.45113	0.701448	3.49438	0.000475158	0.0047609	hsa|mt-sRNA|Phe|H|577|tRF-5|16|	hsa|mt-sRNA|Phe|H|577	tRF-5	normal_1_mismatch	Mt_tRNA	H	sense	Phe	within gene boundary	577	592	577	647
GTTTATGTAGCTTACCT	32.9473	2.04216	0.695383	2.93674	0.00331682	0.0241266	hsa|mt-sRNA|Phe|H|577|tRF-5|17|	hsa|mt-sRNA|Phe|H|577	tRF-5	normal_1_mismatch	Mt_tRNA	H	sense	Phe	within gene boundary	577	593	577	647
GTTTATGTTGCTTACC	13.2168	2.92433	0.927517	3.15286	0.00161679	0.013272	hsa|mt-sRNA|Phe|H|577|tRF-5|16|8A7	hsa|mt-sRNA|Phe|H|577	tRF-5	normal_1_mismatch	Mt_tRNA	H	sense	Phe	within gene boundary	577	592	577	647	8A7
TAAATCAGCTATCGGGCCC	25.866	6.49004	1.32304	4.90541	9.32316e-07	1.86829e-05	hsa|mt-sRNA|Met|H|4414|i-tRF-5|19|5A13	hsa|mt-sRNA|Met|H|4414	i-tRF-5	normal_1_mismatch	Mt_tRNA	H	sense	Met	within gene boundary	4414	4432	4402	4469	5A13
TAACCAAAACATCAGATTGTGAATCTGACACC	24.8616	-2.11766	0.838962	-2.52414	0.011598	0.0638985	hsa|mt-sRNA|His|H|12150|i-tRF-5|32|30A1	hsa|mt-sRNA|His|H|12150	i-tRF-5	normal_1_mismatch	Mt_tRNA	H	sense	His	within gene boundary	12150	12181	12138	12206	30A1
TAACAGCTAAGGACTGCAAAACCCCACTC	15.0762	-1.62977	0.675706	-2.41195	0.0158673	0.0801441	hsa|mt-sRNA|Ala|H|as5580|i-tRF-5|29|	hsa|mt-sRNA|Ala|H|as5580	i-tRF-5	normal_1_mismatch	Mt_tRNA	H	anti-sense	Ala	overlap gene boundary	5580	5608	5587	5655
TACAACGATGGTTTTTCATATCATTGGTCGTGGTTGTAGTCCGTGCGAGA	26.4246	-2.48701	0.636739	-3.90586	9.38908e-05	0.00119946	hsa|mt-sRNA|Glu|L|14677|tRF-3|50|	hsa|mt-sRNA|Glu|L|14677	tRF-3	normal_1_mismatch	Mt_tRNA	L	sense	Glu	within gene boundary	14677	14726	14674	14742
TAGATTGAGGCCAGTTGATTAGGGTGCTTAGCTGTT	25.9097	2.49808	1.08102	2.31086	0.0208406	0.0979267	hsa|mt-sRNA|Asn|L|5694|tRH-5|36|27T8	hsa|mt-sRNA|Asn|L|5694	tRNA-half-5	normal_1_mismatch	Mt_tRNA	L	sense	Asn	within gene boundary	5694	5729	5657	5729	27T8
TAGATTGAGGCCAGTTGATTAGGGTGCTTAGCTGTTAACT	41.6281	-3.22148	0.811814	-3.96825	7.24019e-05	0.000958116	hsa|mt-sRNA|Asn|L|5690|tRF-5|40|31T8	hsa|mt-sRNA|Asn|L|5690	tRF-5	normal_1_mismatch	Mt_tRNA	L	sense	Asn	within gene boundary	5690	5729	5657	5729	31T8
TAGGAGCTTCAACCC	38.868	-9.13507	1.29119	-7.07492	1.49531e-12	8.73264e-11	hsa|mt-sRNA|Ile|H|4306|i-tRF-3|15|9A5	hsa|mt-sRNA|Ile|H|4306	i-tRF-3	normal_1_mismatch	Mt_tRNA	H	sense	Ile	within gene boundary	4306	4320	4263	4331	9A5
TAGGATGGGGTGTGA	11.6784	3.08776	0.880338	3.50747	0.000452383	0.00461092	hsa|mt-sRNA|Gln|L|4386|tRF-5|15|	hsa|mt-sRNA|Gln|L|4386	tRF-5	normal_1_mismatch	Mt_tRNA	L	sense	Gln	within gene boundary	4386	4400	4329	4400
TAGGATGGGGTGTGAT	166.552	4.77347	0.941658	5.06922	3.99449e-07	8.59446e-06	hsa|mt-sRNA|Gln|L|4385|tRF-5|16|	hsa|mt-sRNA|Gln|L|4385	tRF-5	normal_1_mismatch	Mt_tRNA	L	sense	Gln	within gene boundary	4385	4400	4329	4400
TAGGATGGGGTGTGATAGGTGGCACGGAGCATTTTG	18.2261	6.54098	1.29331	5.05754	4.24689e-07	9.04234e-06	hsa|mt-sRNA|Gln|L|4365|tRF-5|36|6T29	hsa|mt-sRNA|Gln|L|4365	tRF-5	normal_1_mismatch	Mt_tRNA	L	sense	Gln	within gene boundary	4365	4400	4329	4400	6T29
TAGGATGGGGTGTGATCGGTGGCACGGAGAATTTTG	19.9261	-8.17217	1.29751	-6.29836	3.0081e-10	9.7596e-09	hsa|mt-sRNA|Gln|L|4365|tRF-5|36|19T16	hsa|mt-sRNA|Gln|L|4365	tRF-5	normal_1_mismatch	Mt_tRNA	L	sense	Gln	within gene boundary	4365	4400	4329	4400	19T16
TAGGATGGGGTGTGCTAGGTGGCACGGAGAATTTTG	18.5847	-8.07143	1.27931	-6.30919	2.80503e-10	9.38003e-09	hsa|mt-sRNA|Gln|L|4365|tRF-5|36|21T14	hsa|mt-sRNA|Gln|L|4365	tRF-5	normal_1_mismatch	Mt_tRNA	L	sense	Gln	within gene boundary	4365	4400	4329	4400	21T14
TCACATCACCCCATAA	27.4396	2.34216	0.935773	2.50292	0.0123174	0.0669596	hsa|mt-sRNA|Phe|H|629|tRF-3|16|	hsa|mt-sRNA|Phe|H|629	tRF-3	normal_1_mismatch	Mt_tRNA	H	sense	Phe	within gene boundary	629	644	577	647
TCAAAGTTAAATTATAGGCT	145.793	3.09445	0.829803	3.72914	0.000192137	0.00231017	hsa|mt-sRNA|Asp|H|7549|i-tRF-5|20|	hsa|mt-sRNA|Asp|H|7549	i-tRF-5	normal_1_mismatch	Mt_tRNA	H	sense	Asp	within gene boundary	7549	7568	7518	7585
TCAAAGTTAAATTATAGGCTAAATCCTATATATA	19.4007	1.88048	0.699205	2.68946	0.00715678	0.0436477	hsa|mt-sRNA|Asp|H|7549|tRF-3|34|33C0	hsa|mt-sRNA|Asp|H|7549	tRF-3	normal_1_mismatch	Mt_tRNA	H	sense	Asp	within gene boundary	7549	7582	7518	7585	33C0
TCAAAGTTAAATTATAGGCTAAATCCTATATATCTT	10.3726	1.97124	0.844081	2.33537	0.0195242	0.0928078	hsa|mt-sRNA|Asp|H|7549|tRF-3|36|	hsa|mt-sRNA|Asp|H|7549	tRF-3	normal_1_mismatch	Mt_tRNA	H	sense	Asp	within gene boundary	7549	7584	7518	7585
TCACAAGAACTGCTAACTCATGCCCCCATGTCTAACAACATGGCTTTCTC	82.4692	-2.17278	0.68717	-3.16192	0.0015673	0.0129699	hsa|mt-sRNA|Ser2|H|12215|tRF-3|50|	hsa|mt-sRNA|Ser2|H|12215	tRF-3	normal_1_mismatch	Mt_tRNA	H	sense	Ser2	within gene boundary	12215	12264	12207	12265
TGAATCTGACAACAGAGGCTTACGACCCCTTATTTACCC	1707.69	2.12723	0.88582	2.40143	0.0163311	0.0816157	hsa|mt-sRNA|His|H|12169|tRF-3|39|38G0	hsa|mt-sRNA|His|H|12169	tRF-3	normal_1_mismatch	Mt_tRNA	H	sense	His	within gene boundary	12169	12207	12138	12206	38G0
TGAATCTGACAACAGAGGCTTACGACCCCTTCTTTACC	26.0939	7.05243	1.42426	4.95163	7.35935e-07	1.48936e-05	hsa|mt-sRNA|His|H|12169|tRF-3|38|31A6	hsa|mt-sRNA|His|H|12169	tRF-3	normal_1_mismatch	Mt_tRNA	H	sense	His	within gene boundary	12169	12206	12138	12206	31A6
TGAATCTGACAACAGAGGCTTACGACCCCTTTTTTACC	6.91295	5.08979	1.56439	3.25352	0.00113985	0.00999512	hsa|mt-sRNA|His|H|12169|tRF-3|38|31A6	hsa|mt-sRNA|His|H|12169	tRF-3	normal_1_mismatch	Mt_tRNA	H	sense	His	within gene boundary	12169	12206	12138	12206	31A6
TGAGTGAAGCATTGGAC	30.6648	2.00288	0.789499	2.5369	0.011184	0.0628024	hsa|mt-sRNA|Tyr|L|5864|i-tRF-5|17|	hsa|mt-sRNA|Tyr|L|5864	i-tRF-5	normal_1_mismatch	Mt_tRNA	L	sense	Tyr	within gene boundary	5864	5880	5826	5891
TGTTTAGACGGGCTC	1153.3	2.47854	0.902379	2.74667	0.00602041	0.0386972	hsa|mt-sRNA|Phe|H|616|i-tRF-3|15|	hsa|mt-sRNA|Phe|H|616	i-tRF-3	normal_1_mismatch	Mt_tRNA	H	sense	Phe	within gene boundary	616	630	577	647
TGTTTCGACGGGCTC	263.223	8.49998	1.09629	7.75343	8.94459e-15	8.31034e-13	hsa|mt-sRNA|Phe|H|616|i-tRF-3|15|5A9	hsa|mt-sRNA|Phe|H|616	i-tRF-3	normal_1_mismatch	Mt_tRNA	H	sense	Phe	within gene boundary	616	630	577	647	5A9
TGTTTCGACGGGCTCA	28.9025	7.93648	1.33937	5.92553	3.113e-09	8.83745e-08	hsa|mt-sRNA|Phe|H|616|i-tRF-3|16|5A10	hsa|mt-sRNA|Phe|H|616	i-tRF-3	normal_1_mismatch	Mt_tRNA	H	sense	Phe	within gene boundary	616	631	577	647	5A10
TGTTTCGACGGGCTCAC	68.3562	9.18142	1.32435	6.93278	4.12662e-12	2.05727e-10	hsa|mt-sRNA|Phe|H|616|i-tRF-3|17|5A11	hsa|mt-sRNA|Phe|H|616	i-tRF-3	normal_1_mismatch	Mt_tRNA	H	sense	Phe	within gene boundary	616	632	577	647	5A11
TGTTTCGACGGGCTCACA	27.3008	6.49461	1.23825	5.24497	1.56304e-07	3.51082e-06	hsa|mt-sRNA|Phe|H|616|i-tRF-3|18|5A12	hsa|mt-sRNA|Phe|H|616	i-tRF-3	normal_1_mismatch	Mt_tRNA	H	sense	Phe	within gene boundary	616	633	577	647	5A12
TTAGACGGGCTCACA	57.0095	2.24623	0.76126	2.95068	0.0031708	0.0233812	hsa|mt-sRNA|Phe|H|619|i-tRF-3|15|	hsa|mt-sRNA|Phe|H|619	i-tRF-3	normal_1_mismatch	Mt_tRNA	H	sense	Phe	within gene boundary	619	633	577	647
TTAGACGGGCTCACATC	40.8727	2.27101	0.893366	2.54208	0.0110196	0.062221	hsa|mt-sRNA|Phe|H|619|i-tRF-3|17|	hsa|mt-sRNA|Phe|H|619	i-tRF-3	normal_1_mismatch	Mt_tRNA	H	sense	Phe	within gene boundary	619	635	577	647
TTCATATCATTGGTCGTGGTTGTAGTCCGTGCGAGAA	4.66123	-3.17382	1.14239	-2.77823	0.00546567	0.0361548	hsa|mt-sRNA|Glu|L|14676|tRF-3|37|	hsa|mt-sRNA|Glu|L|14676	tRF-3	normal_1_mismatch	Mt_tRNA	L	sense	Glu	within gene boundary	14676	14712	14674	14742
TTGGTCGTGGTTGTAGTCCGTGCGAGAATC	11.3525	6.58145	1.31823	4.99265	5.95568e-07	1.22964e-05	hsa|mt-sRNA|Glu|L|14674|tRF-3|30|0T29	hsa|mt-sRNA|Glu|L|14674	tRF-3	normal_1_mismatch	Mt_tRNA	L	sense	Glu	within gene boundary	14674	14703	14674	14742	0T29
TTGTAGTCCGTGCGAGAA	38.0523	3.05406	0.963716	3.16904	0.00152943	0.012708	hsa|mt-sRNA|Glu|L|14676|tRF-3|18|	hsa|mt-sRNA|Glu|L|14676	tRF-3	normal_1_mismatch	Mt_tRNA	L	sense	Glu	within gene boundary	14676	14693	14674	14742
TTTAGACGGGCTCAC	613.366	2.36771	0.718294	3.2963	0.000979666	0.00905152	hsa|mt-sRNA|Phe|H|618|i-tRF-3|15|	hsa|mt-sRNA|Phe|H|618	i-tRF-3	normal_1_mismatch	Mt_tRNA	H	sense	Phe	within gene boundary	618	632	577	647
TTTAGCCGGGCTCAC	133.586	10.1492	1.32258	7.67377	1.6701e-14	1.42237e-12	hsa|mt-sRNA|Phe|H|618|i-tRF-3|15|5A9	hsa|mt-sRNA|Phe|H|618	i-tRF-3	normal_1_mismatch	Mt_tRNA	H	sense	Phe	within gene boundary	618	632	577	647	5A9
TTTAGCCGGGCTCACA	19.3999	7.35991	1.29385	5.68837	1.28255e-08	3.44938e-07	hsa|mt-sRNA|Phe|H|618|i-tRF-3|16|5A10	hsa|mt-sRNA|Phe|H|618	i-tRF-3	normal_1_mismatch	Mt_tRNA	H	sense	Phe	within gene boundary	618	633	577	647	5A10
TTTAGCCGGGCTCACATCACC	7.03881	5.88968	1.3679	4.30564	1.665e-05	0.000255884	hsa|mt-sRNA|Phe|H|618|i-tRF-3|21|5A15	hsa|mt-sRNA|Phe|H|618	i-tRF-3	normal_1_mismatch	Mt_tRNA	H	sense	Phe	within gene boundary	618	638	577	647	5A15
TTTAGCCGGGCTCACATCACCCCATAAACA	2.16557	4.19119	1.52121	2.75517	0.00586613	0.0381324	hsa|mt-sRNA|Phe|H|618|tRF-3|30|5A24	hsa|mt-sRNA|Phe|H|618	tRF-3	normal_1_mismatch	Mt_tRNA	H	sense	Phe	within gene boundary	618	647	577	647	5A24
TTTTACGTTAAAGATTAAGAGAACC	8.85775	5.48215	1.2778	4.2903	1.7843e-05	0.000272172	hsa|mt-sRNA|Lys|H|8322|i-tRF-5|25|5A19	hsa|mt-sRNA|Lys|H|8322	i-tRF-5	normal_1_mismatch	Mt_tRNA	H	sense	Lys	within gene boundary	8322	8346	8295	8364	5A19
TTTTGGTGCAACTCC	18.4911	2.01565	0.872751	2.30953	0.020914	0.0980465	hsa|mt-sRNA|Leu2|H|12311|i-tRF-3|15|	hsa|mt-sRNA|Leu2|H|12311	i-tRF-3	normal_1_mismatch	Mt_tRNA	H	sense	Leu2	within gene boundary	12311	12325	12266	12336
AAAAATTTCGGTTGGGC	23.6831	-3.56421	0.717445	-4.96792	6.76755e-07	1.38329e-05	hsa|mt-sRNA|mtLSU rRNA|H|2801|i-3p|17|16G0	hsa|mt-sRNA|mtLSU rRNA|H|2801	i-3prime	normal_1_mismatch	Mt_rRNA	H	sense	mtLSU rRNA	within gene boundary	2801	2817	1671	3229	16G0
AAAGGTTCGTTTGTC	14.1951	-3.44169	0.898187	-3.83182	0.000127199	0.0016049	hsa|mt-sRNA|mtLSU rRNA|H|3028|i-3p|15|14T0	hsa|mt-sRNA|mtLSU rRNA|H|3028	i-3prime	normal_1_mismatch	Mt_rRNA	H	sense	mtLSU rRNA	within gene boundary	3028	3042	1671	3229	14T0
AAAGTATAGGCGATAGAAATTGAAACCT	32.0038	-1.62239	0.691412	-2.34649	0.0189511	0.0915144	hsa|mt-sRNA|mtLSU rRNA|H|1739|i-5p|28|	hsa|mt-sRNA|mtLSU rRNA|H|1739	i-5prime	normal_1_mismatch	Mt_rRNA	H	sense	mtLSU rRNA	within gene boundary	1739	1766	1671	3229
AAATAAAGTATAGGCGATAGAAATTGAAACCT	28.1012	-2.03996	0.709985	-2.87325	0.00406276	0.0283423	hsa|mt-sRNA|mtLSU rRNA|H|1735|i-5p|32|	hsa|mt-sRNA|mtLSU rRNA|H|1735	i-5prime	normal_1_mismatch	Mt_rRNA	H	sense	mtLSU rRNA	within gene boundary	1735	1766	1671	3229
AAATTTCGGTTGGGA	519.24	1.513	0.571523	2.64732	0.00811333	0.0483488	hsa|mt-sRNA|mtLSU rRNA|H|2803|i-3p|15|14G0	hsa|mt-sRNA|mtLSU rRNA|H|2803	i-3prime	normal_1_mismatch	Mt_rRNA	H	sense	mtLSU rRNA	within gene boundary	2803	2817	1671	3229	14G0
AAATTTCGGTTGGGC	26.7092	-2.37184	0.722993	-3.28059	0.00103591	0.00941065	hsa|mt-sRNA|mtLSU rRNA|H|2803|i-3p|15|14G0	hsa|mt-sRNA|mtLSU rRNA|H|2803	i-3prime	normal_1_mismatch	Mt_rRNA	H	sense	mtLSU rRNA	within gene boundary	2803	2817	1671	3229	14G0
AACATATAACTGAACTCCTCACACCCAATTGGACC	5.1625	-2.85782	1.185	-2.41167	0.0158798	0.0801441	hsa|mt-sRNA|mtLSU rRNA|H|2238|i-5p|35|	hsa|mt-sRNA|mtLSU rRNA|H|2238	i-5prime	normal_1_mismatch	Mt_rRNA	H	sense	mtLSU rRNA	within gene boundary	2238	2272	1671	3229
AAGCCTGCGTCAGATTAAAACACTGAACTGACA	18.8781	-2.22339	0.713062	-3.11809	0.00182029	0.0145909	hsa|mt-sRNA|mtLSU rRNA|H|2337|i-5p|33|	hsa|mt-sRNA|mtLSU rRNA|H|2337	i-5prime	normal_1_mismatch	Mt_rRNA	H	sense	mtLSU rRNA	within gene boundary	2337	2369	1671	3229
AATAAAGTATAGGCGATAGAAATTGAAACCT	12.2016	-1.95462	0.751408	-2.60128	0.00928755	0.0542393	hsa|mt-sRNA|mtLSU rRNA|H|1736|i-5p|31|	hsa|mt-sRNA|mtLSU rRNA|H|1736	i-5prime	normal_1_mismatch	Mt_rRNA	H	sense	mtLSU rRNA	within gene boundary	1736	1766	1671	3229
AATTTCGGTTGGGGA	7.11862	2.56485	1.02877	2.49313	0.0126623	0.0681098	hsa|mt-sRNA|mtLSU rRNA|H|2804|i-3p|15|14C0	hsa|mt-sRNA|mtLSU rRNA|H|2804	i-3prime	normal_1_mismatch	Mt_rRNA	H	sense	mtLSU rRNA	within gene boundary	2804	2818	1671	3229	14C0
ACATATAACTGAACTCCTCACACCCAATTGGACC	2.66324	-3.73757	1.38369	-2.70117	0.00690968	0.0429282	hsa|mt-sRNA|mtLSU rRNA|H|2239|i-5p|34|	hsa|mt-sRNA|mtLSU rRNA|H|2239	i-5prime	normal_1_mismatch	Mt_rRNA	H	sense	mtLSU rRNA	within gene boundary	2239	2272	1671	3229
ACCCAAATAAAGTATAGGCGATAGAAATTGAAACCT	21.3918	-2.2315	0.710788	-3.13947	0.00169253	0.013783	hsa|mt-sRNA|mtLSU rRNA|H|1731|i-5p|36|	hsa|mt-sRNA|mtLSU rRNA|H|1731	i-5prime	normal_1_mismatch	Mt_rRNA	H	sense	mtLSU rRNA	within gene boundary	1731	1766	1671	3229
AGGAGGGCTGAGAGGGCCCC	12.7898	-2.36214	0.857845	-2.75358	0.00589481	0.0381324	hsa|mt-sRNA|COIII|L|as9264|i-3p|20|	hsa|mt-sRNA|COIII|L|as9264	i-3prime	normal_1_mismatch	protein_coding	L	anti-sense	COIII	within gene boundary	9264	9283	9207	9990
ATAGGCGATCGAAATTGAAACCT	215.337	-9.53589	1.07365	-8.88173	6.58256e-19	1.68184e-16	hsa|mt-sRNA|mtLSU rRNA|H|1744|i-5p|23|9A13	hsa|mt-sRNA|mtLSU rRNA|H|1744	i-5prime	normal_1_mismatch	Mt_rRNA	H	sense	mtLSU rRNA	within gene boundary	1744	1766	1671	3229	9A13
ATATAACTGAACTCCTCACACCCAATTGGACC	5.29815	-2.78802	1.1777	-2.36735	0.0179159	0.0873987	hsa|mt-sRNA|mtLSU rRNA|H|2241|i-5p|32|	hsa|mt-sRNA|mtLSU rRNA|H|2241	i-5prime	normal_1_mismatch	Mt_rRNA	H	sense	mtLSU rRNA	within gene boundary	2241	2272	1671	3229
ATGGCACATGCAGCGCAAGTAGGTCTAC	19.7829	2.97736	0.969704	3.07038	0.00213785	0.0166785	hsa|mt-sRNA|tRNA-Asp|H|7586|tRF-1|28|	hsa|mt-sRNA|tRNA-Asp|H|7586	tRF-1	normal_1_mismatch	protein_coding	H	sense	tRNA-Asp	within gene boundary	7586	7613	7586	8269
ATTAGGAGGGCTGAGAGGGCCCCTGTAA	16.9253	-2.52105	0.822129	-3.0665	0.00216584	0.0168326	hsa|mt-sRNA|COIII|L|as9259|i-3p|28|1A26	hsa|mt-sRNA|COIII|L|as9259	i-3prime	normal_1_mismatch	protein_coding	L	anti-sense	COIII	within gene boundary	9259	9286	9207	9990	1A26
ATTTACCCAAATAAAGTATAGGCGATAGAAATTGAAACCTGGCGC	1.96692	-4.86626	1.66308	-2.92605	0.00343298	0.0247951	hsa|mt-sRNA|mtLSU rRNA|H|1727|i-5p|45|	hsa|mt-sRNA|mtLSU rRNA|H|1727	i-5prime	normal_1_mismatch	Mt_rRNA	H	sense	mtLSU rRNA	within gene boundary	1727	1771	1671	3229
CAAATCAAGTATAGGCGATAGAAATTGAAACCT	1.57805	3.75691	1.55863	2.4104	0.0159351	0.0802252	hsa|mt-sRNA|mtLSU rRNA|H|1734|i-5p|33|5A27	hsa|mt-sRNA|mtLSU rRNA|H|1734	i-5prime	normal_1_mismatch	Mt_rRNA	H	sense	mtLSU rRNA	within gene boundary	1734	1766	1671	3229	5A27
CAACAATAGGGTTTACGACCTCGATGTTGGACCA	86.1473	-1.88517	0.749976	-2.51364	0.0119493	0.0653057	hsa|mt-sRNA|mtLSU rRNA|H|2967|i-3p|34|31T2	hsa|mt-sRNA|mtLSU rRNA|H|2967	i-3prime	normal_1_mismatch	Mt_rRNA	H	sense	mtLSU rRNA	within gene boundary	2967	3000	1671	3229	31T2
CAAATAAAGTATAGGCGATAGAAATTGAAACC	23.265	-3.93853	0.864649	-4.55506	5.23695e-06	8.82188e-05	hsa|mt-sRNA|mtLSU rRNA|H|1734|i-5p|32|	hsa|mt-sRNA|mtLSU rRNA|H|1734	i-5prime	normal_1_mismatch	Mt_rRNA	H	sense	mtLSU rRNA	within gene boundary	1734	1765	1671	3229
CAAATAAAGTATAGGCGATAGAAATTGAAACCT	50.9871	-2.77871	0.662495	-4.19431	2.73704e-05	0.000405399	hsa|mt-sRNA|mtLSU rRNA|H|1734|i-5p|33|	hsa|mt-sRNA|mtLSU rRNA|H|1734	i-5prime	normal_1_mismatch	Mt_rRNA	H	sense	mtLSU rRNA	within gene boundary	1734	1766	1671	3229
CAAATAAAGTATAGGCGATAGAAATTGAAACCTGGCGCA	4.23853	-2.68676	1.05962	-2.53557	0.0112263	0.0628674	hsa|mt-sRNA|mtLSU rRNA|H|1734|i-5p|39|	hsa|mt-sRNA|mtLSU rRNA|H|1734	i-5prime	normal_1_mismatch	Mt_rRNA	H	sense	mtLSU rRNA	within gene boundary	1734	1772	1671	3229
CATTAGGAGGGCTGAGAGGGCCCCTA	14.7124	-2.35972	0.840026	-2.80911	0.00496791	0.0336238	hsa|mt-sRNA|COIII|L|as9262|i-3p|26|0C25	hsa|mt-sRNA|COIII|L|as9262	i-3prime	normal_1_mismatch	protein_coding	L	anti-sense	COIII	within gene boundary	9262	9287	9207	9990	0C25
CATTAGGAGGGCTGAGAGGGCCCCTG	10.3692	-2.86752	1.02385	-2.80073	0.00509867	0.0340578	hsa|mt-sRNA|COIII|L|as9262|i-3p|26|	hsa|mt-sRNA|COIII|L|as9262	i-3prime	normal_1_mismatch	protein_coding	L	anti-sense	COIII	within gene boundary	9262	9287	9207	9990
CATTAGGAGGGCTGAGAGGGCCCCTGA	27.9791	-2.12086	0.75592	-2.80567	0.00502121	0.0338628	hsa|mt-sRNA|COIII|L|as9261|i-3p|27|0A26	hsa|mt-sRNA|COIII|L|as9261	i-3prime	normal_1_mismatch	protein_coding	L	anti-sense	COIII	within gene boundary	9261	9287	9207	9990	0A26
CATTAGGAGGGCTGAGAGGGCCCCTGTCA	42.1936	-7.82358	1.20733	-6.48006	9.1686e-11	3.34654e-09	hsa|mt-sRNA|COIII|L|as9259|i-3p|29|1A27	hsa|mt-sRNA|COIII|L|as9259	i-3prime	normal_1_mismatch	protein_coding	L	anti-sense	COIII	within gene boundary	9259	9287	9207	9990	1A27
CATTAGGAGGGCTGAGAGGGCCCCTGT	161.91	-2.7205	0.799817	-3.40141	0.000670398	0.0064333	hsa|mt-sRNA|COIII|L|as9261|i-3p|27|	hsa|mt-sRNA|COIII|L|as9261	i-3prime	normal_1_mismatch	protein_coding	L	anti-sense	COIII	within gene boundary	9261	9287	9207	9990
CATTTACCCAAATAAAGTATAGGCGATAGAAATTGAAACCT	21.3513	-1.77643	0.75758	-2.34487	0.0190335	0.0915398	hsa|mt-sRNA|mtLSU rRNA|H|1726|i-5p|41|	hsa|mt-sRNA|mtLSU rRNA|H|1726	i-5prime	normal_1_mismatch	Mt_rRNA	H	sense	mtLSU rRNA	within gene boundary	1726	1766	1671	3229
CCAAACCTGCATTAAAAATTTCGGTTGGGAC	397.721	-1.63706	0.674303	-2.42779	0.0151913	0.0778221	hsa|mt-sRNA|mtLSU rRNA|H|2788|i-3p|31|29G1	hsa|mt-sRNA|mtLSU rRNA|H|2788	i-3prime	normal_1_mismatch	Mt_rRNA	H	sense	mtLSU rRNA	within gene boundary	2788	2818	1671	3229	29G1
CCAAATAAAGTATAGGCGATAGAAATTGAAACC	16.9969	-2.36299	0.985239	-2.3984	0.0164671	0.0818947	hsa|mt-sRNA|mtLSU rRNA|H|1733|i-5p|33|	hsa|mt-sRNA|mtLSU rRNA|H|1733	i-5prime	normal_1_mismatch	Mt_rRNA	H	sense	mtLSU rRNA	within gene boundary	1733	1765	1671	3229
CCAAATAAAGTATAGGCGATAGAAATTGAAACCT	27.2378	-1.88588	0.701178	-2.68959	0.00715396	0.0436477	hsa|mt-sRNA|mtLSU rRNA|H|1733|i-5p|34|	hsa|mt-sRNA|mtLSU rRNA|H|1733	i-5prime	normal_1_mismatch	Mt_rRNA	H	sense	mtLSU rRNA	within gene boundary	1733	1766	1671	3229
CCCAAATAAAGTATAGGCGATAGAAATTGAAACC	13.0334	-2.34608	0.985684	-2.38015	0.0173055	0.0846232	hsa|mt-sRNA|mtLSU rRNA|H|1732|i-5p|34|	hsa|mt-sRNA|mtLSU rRNA|H|1732	i-5prime	normal_1_mismatch	Mt_rRNA	H	sense	mtLSU rRNA	within gene boundary	1732	1765	1671	3229
CGATAGAAATTGAACCCT	25.0626	-8.50088	1.22968	-6.91306	4.74308e-12	2.25462e-10	hsa|mt-sRNA|mtLSU rRNA|H|1749|i-5p|18|14A3	hsa|mt-sRNA|mtLSU rRNA|H|1749	i-5prime	normal_1_mismatch	Mt_rRNA	H	sense	mtLSU rRNA	within gene boundary	1749	1766	1671	3229	14A3
GCACTTGGACGAACA	74.0656	2.07772	0.640062	3.24612	0.00116988	0.0101755	hsa|mt-sRNA|mtSSU rRNA|H|1588|3p|15|14C0	hsa|mt-sRNA|mtSSU rRNA|H|1588	3prime	normal_1_mismatch	Mt_rRNA	H	sense	mtSSU rRNA	within gene boundary	1588	1602	648	1601	14C0
GCTAAACCTAGCCCCAAACCCACTCCACC	44.9588	-1.6122	0.622419	-2.59022	0.00959143	0.0558011	hsa|mt-sRNA|tRNA-Val|H|1671|tRF-1|29|	hsa|mt-sRNA|tRNA-Val|H|1671	tRF-1	normal_1_mismatch	Mt_rRNA	H	sense	tRNA-Val	within gene boundary	1671	1699	1671	3229
GCTAAACCTAGCCCCAAACCCACTCCACCTTCCTACCAGACAACC	6.72234	5.83759	1.31649	4.43421	9.24087e-06	0.000147565	hsa|mt-sRNA|tRNA-Val|H|1671|tRF-1|45|31A13	hsa|mt-sRNA|tRNA-Val|H|1671	tRF-1	normal_1_mismatch	Mt_rRNA	H	sense	tRNA-Val	within gene boundary	1671	1715	1671	3229	31A13
GCTAAACCTAGCCCCACACCCACTCCACCTTACTACCA	36.9037	-9.04536	1.21564	-7.44082	1.00066e-13	6.81781e-12	hsa|mt-sRNA|tRNA-Val|H|1671|tRF-1|38|16A21	hsa|mt-sRNA|tRNA-Val|H|1671	tRF-1	normal_1_mismatch	Mt_rRNA	H	sense	tRNA-Val	within gene boundary	1671	1708	1671	3229	16A21
GCTAAACCTCGCCCCAAACCCACTCCACCTTACTACCA	61.8337	-9.79358	1.20144	-8.15155	3.59296e-16	4.32e-14	hsa|mt-sRNA|tRNA-Val|H|1671|tRF-1|38|9A28	hsa|mt-sRNA|tRNA-Val|H|1671	tRF-1	normal_1_mismatch	Mt_rRNA	H	sense	tRNA-Val	within gene boundary	1671	1708	1671	3229	9A28
GCTAAACCTCGCCCCAAACCCACTCCACCTTACTACCAGACAACC	34.5552	-8.22972	1.19683	-6.87627	6.14381e-12	2.6719e-10	hsa|mt-sRNA|tRNA-Val|H|1671|tRF-1|45|9A35	hsa|mt-sRNA|tRNA-Val|H|1671	tRF-1	normal_1_mismatch	Mt_rRNA	H	sense	tRNA-Val	within gene boundary	1671	1715	1671	3229	9A35
GCTAACCCTAGCCCCAAACC	26.4632	7.07277	1.41201	5.009	5.4714e-07	1.15294e-05	hsa|mt-sRNA|tRNA-Val|H|1671|tRF-1|20|5A14	hsa|mt-sRNA|tRNA-Val|H|1671	tRF-1	normal_1_mismatch	Mt_rRNA	H	sense	tRNA-Val	within gene boundary	1671	1690	1671	3229	5A14
GCTAACCCTAGCCCCAAACCC	12.9371	6.78154	1.2434	5.45402	4.9245e-08	1.1842e-06	hsa|mt-sRNA|tRNA-Val|H|1671|tRF-1|21|5A15	hsa|mt-sRNA|tRNA-Val|H|1671	tRF-1	normal_1_mismatch	Mt_rRNA	H	sense	tRNA-Val	within gene boundary	1671	1691	1671	3229	5A15
GCTAACCCTAGCCCCAAACCCA	5.2178	5.46686	1.3098	4.1738	2.99555e-05	0.000439303	hsa|mt-sRNA|tRNA-Val|H|1671|tRF-1|22|5A16	hsa|mt-sRNA|tRNA-Val|H|1671	tRF-1	normal_1_mismatch	Mt_rRNA	H	sense	tRNA-Val	within gene boundary	1671	1692	1671	3229	5A16
GCTAACCCTAGCCCCAAACCCACT	5.15091	3.9703	1.21693	3.26256	0.00110412	0.00985514	hsa|mt-sRNA|tRNA-Val|H|1671|tRF-1|24|5A18	hsa|mt-sRNA|tRNA-Val|H|1671	tRF-1	normal_1_mismatch	Mt_rRNA	H	sense	tRNA-Val	within gene boundary	1671	1694	1671	3229	5A18
GCTAACCCTAGCCCCAAACCCACTCCACCTTACTACC	31.6901	8.07552	1.36463	5.91775	3.26367e-09	9.13829e-08	hsa|mt-sRNA|tRNA-Val|H|1671|tRF-1|37|5A31	hsa|mt-sRNA|tRNA-Val|H|1671	tRF-1	normal_1_mismatch	Mt_rRNA	H	sense	tRNA-Val	within gene boundary	1671	1707	1671	3229	5A31
GCTAACCCTAGCCCCAAACCCACTCCACCTTACTACCA	46.6484	6.22756	1.04247	5.97383	2.31751e-09	6.6718e-08	hsa|mt-sRNA|tRNA-Val|H|1671|tRF-1|38|5A32	hsa|mt-sRNA|tRNA-Val|H|1671	tRF-1	normal_1_mismatch	Mt_rRNA	H	sense	tRNA-Val	within gene boundary	1671	1708	1671	3229	5A32
GCTAACCCTAGCCCCAAACCCACTCCACCTTACTACCAGACAA	21.6588	7.52296	1.34883	5.57742	2.44117e-08	6.31615e-07	hsa|mt-sRNA|tRNA-Val|H|1671|tRF-1|43|5A37	hsa|mt-sRNA|tRNA-Val|H|1671	tRF-1	normal_1_mismatch	Mt_rRNA	H	sense	tRNA-Val	within gene boundary	1671	1713	1671	3229	5A37
GCTAACCCTAGCCCCAAACCCACTCCACCTTACTACCAGACAAC	24.176	7.68177	1.26612	6.06719	1.30165e-09	3.91262e-08	hsa|mt-sRNA|tRNA-Val|H|1671|tRF-1|44|5A38	hsa|mt-sRNA|tRNA-Val|H|1671	tRF-1	normal_1_mismatch	Mt_rRNA	H	sense	tRNA-Val	within gene boundary	1671	1714	1671	3229	5A38
GCTAACCCTAGCCCCAAACCCACTCCACCTTACTACCAGACAACC	35.8211	8.24949	1.23368	6.68688	2.27982e-11	9.13717e-10	hsa|mt-sRNA|tRNA-Val|H|1671|tRF-1|45|5A39	hsa|mt-sRNA|tRNA-Val|H|1671	tRF-1	normal_1_mismatch	Mt_rRNA	H	sense	tRNA-Val	within gene boundary	1671	1715	1671	3229	5A39
GCTAACCCTAGCCCCAAACCCACTCCACCTTACTACCAGACAACCT	11.8179	5.89524	1.26191	4.67167	2.98765e-06	5.45246e-05	hsa|mt-sRNA|tRNA-Val|H|1671|tRF-1|46|5A40	hsa|mt-sRNA|tRNA-Val|H|1671	tRF-1	normal_1_mismatch	Mt_rRNA	H	sense	tRNA-Val	within gene boundary	1671	1716	1671	3229	5A40
GGTAAGTGTACTGGAAAGTGCACTTGGACG	48.9901	1.92513	0.705859	2.72736	0.00638439	0.0406125	hsa|mt-sRNA|mtSSU rRNA|H|1569|3p|30|	hsa|mt-sRNA|mtSSU rRNA|H|1569	3prime	normal_1_mismatch	Mt_rRNA	H	sense	mtSSU rRNA	within gene boundary	1569	1598	648	1601
GGTAAGTGTACTGGAAAGTGCACTTGGACGA	36.6279	1.84779	0.743236	2.48615	0.0129134	0.0689166	hsa|mt-sRNA|mtSSU rRNA|H|1569|3p|31|	hsa|mt-sRNA|mtSSU rRNA|H|1569	3prime	normal_1_mismatch	Mt_rRNA	H	sense	mtSSU rRNA	within gene boundary	1569	1599	648	1601
GTAACCTGGTAAGTGTACTGGAAAGTGCACTTGGACG	3.46946	4.89582	1.37939	3.54926	0.00038631	0.00411259	hsa|mt-sRNA|mtSSU rRNA|H|1562|3p|37|5A31	hsa|mt-sRNA|mtSSU rRNA|H|1562	3prime	normal_1_mismatch	Mt_rRNA	H	sense	mtSSU rRNA	within gene boundary	1562	1598	648	1601	5A31
GTAAGTGTACTGGAAAGTGCACTTGGACC	52.6848	2.78822	0.782951	3.56116	0.000369214	0.00399298	hsa|mt-sRNA|mtSSU rRNA|H|1570|3p|29|28G0	hsa|mt-sRNA|mtSSU rRNA|H|1570	3prime	normal_1_mismatch	Mt_rRNA	H	sense	mtSSU rRNA	within gene boundary	1570	1598	648	1601	28G0
GTAGGCGATAGAAATTGAAACCT	33.9754	-8.93544	1.2463	-7.16959	7.52208e-13	4.65913e-11	hsa|mt-sRNA|mtLSU rRNA|H|1744|i-5p|23|0A22	hsa|mt-sRNA|mtLSU rRNA|H|1744	i-5prime	normal_1_mismatch	Mt_rRNA	H	sense	mtLSU rRNA	within gene boundary	1744	1766	1671	3229	0A22
TAAAACTTTCGGTTGGG	10.6294	4.96966	1.14966	4.32273	1.54113e-05	0.000238641	hsa|mt-sRNA|mtLSU rRNA|H|2800|i-3p|17|5A11	hsa|mt-sRNA|mtLSU rRNA|H|2800	i-3prime	normal_1_mismatch	Mt_rRNA	H	sense	mtLSU rRNA	within gene boundary	2800	2816	1671	3229	5A11
TAAAGTATAGGCGATAGAAATTGAAACCT	25.2881	-1.9611	0.69617	-2.81699	0.00484763	0.0330285	hsa|mt-sRNA|mtLSU rRNA|H|1738|i-5p|29|	hsa|mt-sRNA|mtLSU rRNA|H|1738	i-5prime	normal_1_mismatch	Mt_rRNA	H	sense	mtLSU rRNA	within gene boundary	1738	1766	1671	3229
TACCAAACCTGCATTAAAAATTTCGGTTGGG	47.2366	-2.8373	0.92366	-3.0718	0.00212775	0.0166633	hsa|mt-sRNA|mtLSU rRNA|H|2786|i-3p|31|	hsa|mt-sRNA|mtLSU rRNA|H|2786	i-3prime	normal_1_mismatch	Mt_rRNA	H	sense	mtLSU rRNA	within gene boundary	2786	2816	1671	3229
TACCCCAATAAAGTATAGGCGATAGAAATTGAAACCT	3.41657	4.85697	1.48149	3.27844	0.00104383	0.00944061	hsa|mt-sRNA|mtLSU rRNA|H|1730|i-5p|37|5A31	hsa|mt-sRNA|mtLSU rRNA|H|1730	i-5prime	normal_1_mismatch	Mt_rRNA	H	sense	mtLSU rRNA	within gene boundary	1730	1766	1671	3229	5A31
TAGGAGGGCTGAGAGGGCCCC	11.7024	-2.64047	1.02411	-2.57831	0.00992847	0.0573271	hsa|mt-sRNA|COIII|L|as9264|i-3p|21|	hsa|mt-sRNA|COIII|L|as9264	i-3prime	normal_1_mismatch	protein_coding	L	anti-sense	COIII	within gene boundary	9264	9284	9207	9990
TAGGAGGGCTGAGAGGGCCCCT	47.5877	-2.85128	0.828154	-3.44294	0.000575434	0.00562769	hsa|mt-sRNA|COIII|L|as9263|i-3p|22|	hsa|mt-sRNA|COIII|L|as9263	i-3prime	normal_1_mismatch	protein_coding	L	anti-sense	COIII	within gene boundary	9263	9284	9207	9990
TAGGAGGGCTGAGAGGGCCCCTA	27.8515	-2.06354	0.817489	-2.52424	0.011595	0.0638985	hsa|mt-sRNA|COIII|L|as9262|i-3p|23|0C22	hsa|mt-sRNA|COIII|L|as9262	i-3prime	normal_1_mismatch	protein_coding	L	anti-sense	COIII	within gene boundary	9262	9284	9207	9990	0C22
TAGGAGGGCTGAGAGGGCCCCTGTA	21.4381	-2.34801	0.812149	-2.89111	0.00383887	0.0272453	hsa|mt-sRNA|COIII|L|as9260|i-3p|25|0A24	hsa|mt-sRNA|COIII|L|as9260	i-3prime	normal_1_mismatch	protein_coding	L	anti-sense	COIII	within gene boundary	9260	9284	9207	9990	0A24
TATAACTGAACTCCTCACACCCAATTGGACC	10.2739	-2.73624	0.944668	-2.89651	0.00377338	0.0270624	hsa|mt-sRNA|mtLSU rRNA|H|2242|i-5p|31|	hsa|mt-sRNA|mtLSU rRNA|H|2242	i-5prime	normal_1_mismatch	Mt_rRNA	H	sense	mtLSU rRNA	within gene boundary	2242	2272	1671	3229
TATAACTGAACTCCTCACACCCAATTGGACCAATCTATCACCCTATAGAA	2.83568	-3.27501	1.33075	-2.46103	0.013854	0.0724235	hsa|mt-sRNA|mtLSU rRNA|H|2242|i-5p|50|	hsa|mt-sRNA|mtLSU rRNA|H|2242	i-5prime	normal_1_mismatch	Mt_rRNA	H	sense	mtLSU rRNA	within gene boundary	2242	2291	1671	3229
TATTACAGGTTCGTTTGT	10.1227	5.68031	1.23375	4.6041	4.1426e-06	7.26722e-05	hsa|mt-sRNA|mtLSU rRNA|H|3024|i-3p|18|5A12	hsa|mt-sRNA|mtLSU rRNA|H|3024	i-3prime	normal_1_mismatch	Mt_rRNA	H	sense	mtLSU rRNA	within gene boundary	3024	3041	1671	3229	5A12
TCATTAGGAGGGCTGAGAGGGCCCCTGTAA	20.5777	-2.49013	0.807462	-3.08389	0.00204312	0.0161241	hsa|mt-sRNA|COIII|L|as9259|i-3p|30|1A28	hsa|mt-sRNA|COIII|L|as9259	i-3prime	normal_1_mismatch	protein_coding	L	anti-sense	COIII	within gene boundary	9259	9288	9207	9990	1A28
TTACCCAAATAAAGTATAGGCGATAGAAATTGAAACCT	44.8309	-1.78886	0.706343	-2.53257	0.0113231	0.0632363	hsa|mt-sRNA|mtLSU rRNA|H|1729|i-5p|38|	hsa|mt-sRNA|mtLSU rRNA|H|1729	i-5prime	normal_1_mismatch	Mt_rRNA	H	sense	mtLSU rRNA	within gene boundary	1729	1766	1671	3229
TTACCCAAATAAAGTATAGGCGATAGAAATTGAAACCTGGCGCA	2.03718	-4.10747	1.58676	-2.58859	0.00963688	0.0558011	hsa|mt-sRNA|mtLSU rRNA|H|1729|i-5p|44|	hsa|mt-sRNA|mtLSU rRNA|H|1729	i-5prime	normal_1_mismatch	Mt_rRNA	H	sense	mtLSU rRNA	within gene boundary	1729	1772	1671	3229
TTGACAATCGAGTAGTACTCCCGATTGAAGCCC	11.1622	2.62949	1.12091	2.34586	0.0189834	0.0915144	hsa|mt-sRNA|COII|H|7998|i-3p|33|	hsa|mt-sRNA|COII|H|7998	i-3prime	normal_1_mismatch	protein_coding	H	sense	COII	within gene boundary	7998	8030	7586	8269
AAAAGATAAAATTTGAAATCTGGTTAGGCTGGA	29.3323	-2.42325	0.967139	-2.50558	0.012225	0.0666342	hsa|mt-sRNA|non-coding|L|as376|nc|33|0A32	hsa|mt-sRNA|non-coding|L|as376	non-coding	normal_1_mismatch	non-coding	L	anti-sense	non-coding	falls in non-coding region	376	408	na	na	0A32
AATCAGAGAAAAAGTCTTTAACTCCACCATTAGCACC	41.8679	2.02737	0.700479	2.89427	0.00380044	0.0270665	hsa|mt-sRNA|non-coding|H|15954|nc|37|	hsa|mt-sRNA|non-coding|H|15954	non-coding	normal_1_mismatch	non-coding	H	sense	non-coding	falls in non-coding region	15954	15990	na	na
AATCAGAGAAAAAGTCTTTAACTCCACCATTAGCACCC	195.614	2.84206	0.765646	3.71198	0.000205642	0.00245809	hsa|mt-sRNA|non-coding|H|15954|nc|38|	hsa|mt-sRNA|non-coding|H|15954	non-coding	normal_1_mismatch	non-coding	H	sense	non-coding	falls in non-coding region	15954	15991	na	na
AGACTTTTTCTCTGAC	28.5277	2.52019	0.713641	3.53146	0.000413272	0.00433194	hsa|mt-sRNA|non-coding|L|as15955|nc|16|0A15	hsa|mt-sRNA|non-coding|L|as15955	non-coding	normal_1_mismatch	non-coding	L	anti-sense	non-coding	falls in non-coding region	15955	15970	na	na	0A15
ATCAGAGAAAAAGTCTTTAACTCCACCATTAGCACCC	23.9401	2.40328	0.849838	2.82792	0.00468509	0.0320278	hsa|mt-sRNA|non-coding|H|15955|nc|37|	hsa|mt-sRNA|non-coding|H|15955	non-coding	normal_1_mismatch	non-coding	H	sense	non-coding	falls in non-coding region	15955	15991	na	na
CAGAGAATAGTTTAAATTAGAATC	200.879	-2.12063	0.677674	-3.12928	0.00175233	0.0141571	hsa|mt-sRNA|non-coding|L|as16000|nc|24|	hsa|mt-sRNA|non-coding|L|as16000	non-coding	normal_1_mismatch	non-coding	L	anti-sense	non-coding	falls in non-coding region	16000	16023	na	na
CAGAGAATAGTTTAAATTAGAATCTTAGCTTT	21.631	3.03433	1.00443	3.02094	0.00251991	0.0190767	hsa|mt-sRNA|non-coding|L|as15992|nc|32|	hsa|mt-sRNA|non-coding|L|as15992	non-coding	normal_1_mismatch	non-coding	L	anti-sense	non-coding	falls in non-coding region	15992	16023	na	na
CAGAGCATAGTTTAAATTAGAATC	7.63555	6.03325	1.30045	4.63937	3.49476e-06	6.26605e-05	hsa|mt-sRNA|non-coding|L|as16000|nc|24|18T5	hsa|mt-sRNA|non-coding|L|as16000	non-coding	normal_1_mismatch	non-coding	L	anti-sense	non-coding	falls in non-coding region	16000	16023	na	na	18T5
CCCTATCTGAGGGGC	8.41229	3.27772	1.0027	3.2689	0.00107967	0.00967915	hsa|mt-sRNA|non-coding|L|as16376|nc|15|0C14	hsa|mt-sRNA|non-coding|L|as16376	non-coding	normal_1_mismatch	non-coding	L	anti-sense	non-coding	falls in non-coding region	16376	16390	na	na	0C14
CCGGCGGCGGGAGAA	59.9594	3.18434	0.909546	3.50102	0.000463489	0.00466686	hsa|mt-sRNA|non-coding|L|as5731|nc|15|	hsa|mt-sRNA|non-coding|L|as5731	non-coding	normal_1_mismatch	non-coding	L	anti-sense	non-coding	falls in non-coding region	5731	5745	na	na
CGGCGGCGGGAGAAC	21.4331	2.7454	0.833638	3.29328	0.000990269	0.00907673	hsa|mt-sRNA|non-coding|L|as5730|nc|15|0C14	hsa|mt-sRNA|non-coding|L|as5730	non-coding	normal_1_mismatch	non-coding	L	anti-sense	non-coding	falls in non-coding region	5730	5744	na	na	0C14
TCTGGTTAGGCTGGA	5.95186	3.49849	1.22493	2.85607	0.00428921	0.0296187	hsa|mt-sRNA|non-coding|L|as376|nc|15|0A14	hsa|mt-sRNA|non-coding|L|as376	non-coding	normal_1_mismatch	non-coding	L	anti-sense	non-coding	falls in non-coding region	376	390	na	na	0A14
TTTTTTCCCGGCGGC	530.886	2.633	0.915189	2.877	0.0040148	0.0282306	hsa|mt-sRNA|non-coding|L|as5738|nc|15|	hsa|mt-sRNA|non-coding|L|as5738	non-coding	normal_1_mismatch	non-coding	L	anti-sense	non-coding	falls in non-coding region	5738	5752	na	na
AACTTAACTTGACCGCTCTGACCA	246.12	-2.20584	0.550209	-4.00909	6.09524e-05	0.000853334	hsa|mt-sRNA|Val|H|1650|tRF-5|24|CCA	hsa|mt-sRNA|Val|H|1650-CCA	tRF-5	CCA_0_mismatch	Mt_tRNA	H	sense	Val	within gene boundary	1650	1670	1602	1670	CCA
AACTTACACTTAGGAGATTTCAACTTAACTTGACCGCTCTGACCA	377.837	-1.79749	0.57429	-3.12993	0.00174845	0.0141571	hsa|mt-sRNA|Val|H|1629|tRF-5|45|CCA	hsa|mt-sRNA|Val|H|1629-CCA	tRF-5	CCA_0_mismatch	Mt_tRNA	H	sense	Val	within gene boundary	1629	1670	1602	1670	CCA
AAGAACTGCTAACTCATGCCCCCATGTCTAACAACATGGCTTTCTCACCA	56.2807	-2.03826	0.581221	-3.50686	0.000453422	0.00461092	hsa|mt-sRNA|Ser2|H|12219|tRF-5|50|CCA	hsa|mt-sRNA|Ser2|H|12219-CCA	tRF-5	CCA_0_mismatch	Mt_tRNA	H	sense	Ser2	within gene boundary	12219	12265	12207	12265	CCA
ACCTCTTTACAGTGACCA	33.5376	1.88338	0.767158	2.45501	0.014088	0.0734587	hsa|mt-sRNA|Lys|H|8350|tRF-5|18|CCA	hsa|mt-sRNA|Lys|H|8350-CCA	tRF-5	CCA_0_mismatch	Mt_tRNA	H	sense	Lys	within gene boundary	8350	8364	8295	8364	CCA
ACTTAACTTGACCGCTCTGACCA	563.466	-2.19789	0.502856	-4.37081	1.23788e-05	0.000194633	hsa|mt-sRNA|Val|H|1651|tRF-5|23|CCA	hsa|mt-sRNA|Val|H|1651-CCA	tRF-5	CCA_0_mismatch	Mt_tRNA	H	sense	Val	within gene boundary	1651	1670	1602	1670	CCA
ACTTAATTTCTGCCA	28.3523	1.73863	0.714673	2.43276	0.014984	0.0772039	hsa|mt-sRNA|Trp|H|5568|tRF-5|15|CCA	hsa|mt-sRNA|Trp|H|5568-CCA	tRF-5	CCA_0_mismatch	Mt_tRNA	H	sense	Trp	within gene boundary	5568	5579	5512	5579	CCA
ACTTACACTTAGGAGATTTCAACTTAACTTGACCGCTCTGACCA	111.788	-1.46894	0.633641	-2.31826	0.0204353	0.0966895	hsa|mt-sRNA|Val|H|1630|tRF-5|44|CCA	hsa|mt-sRNA|Val|H|1630-CCA	tRF-5	CCA_0_mismatch	Mt_tRNA	H	sense	Val	within gene boundary	1630	1670	1602	1670	CCA
AGTAAGGTCAGCTAAATAAGCTATCGGGCCCCCA	25.6336	7.02674	1.21433	5.78652	7.18604e-09	1.95843e-07	hsa|mt-sRNA|Met|H|4402|tRF-3|34|CCA	hsa|mt-sRNA|Met|H|4402-CCA	tRF-3	CCA_0_mismatch	Mt_tRNA	H	sense	Met	within gene boundary	4402	4432	4402	4469	CCA
AGATTTCAACTTAACTTGACCGCTCTGACCA	2168.77	-2.33945	0.585644	-3.99467	6.47857e-05	0.000882813	hsa|mt-sRNA|Val|H|1643|tRH-5|31|CCA	hsa|mt-sRNA|Val|H|1643-CCA	tRNA-half-5	CCA_0_mismatch	Mt_tRNA	H	sense	Val	within gene boundary	1643	1670	1602	1670	CCA
AGGAGATTTCAACTTAACTTGACCGCTCTGACCA	3275.94	-2.70972	0.556939	-4.86538	1.14238e-06	2.24522e-05	hsa|mt-sRNA|Val|H|1640|tRH-5|34|CCA	hsa|mt-sRNA|Val|H|1640-CCA	tRNA-half-5	CCA_0_mismatch	Mt_tRNA	H	sense	Val	within gene boundary	1640	1670	1602	1670	CCA
ATATCATTGGTCGTGGTTGTAGTCCGTGCGAGAATACCA	1080.87	-1.36499	0.580534	-2.35126	0.0187098	0.090838	hsa|mt-sRNA|Glu|L|14674|tRF-3|39|CCA	hsa|mt-sRNA|Glu|L|14674-CCA	tRF-3	CCA_0_mismatch	Mt_tRNA	L	sense	Glu	within gene boundary	14674	14709	14674	14742	CCA
ATACTTAATTTCTGCCA	38.9268	1.92634	0.782433	2.46199	0.0138167	0.0724137	hsa|mt-sRNA|Trp|H|5566|tRF-5|17|CCA	hsa|mt-sRNA|Trp|H|5566-CCA	tRF-5	CCA_0_mismatch	Mt_tRNA	H	sense	Trp	within gene boundary	5566	5579	5512	5579	CCA
ATCATTGGTCGTGGTTGTAGTCCGTGCGAGAATACCA	130.788	-1.28947	0.550718	-2.34144	0.0192096	0.0917393	hsa|mt-sRNA|Glu|L|14674|tRH-3|37|CCA	hsa|mt-sRNA|Glu|L|14674-CCA	tRNA-half-3	CCA_0_mismatch	Mt_tRNA	L	sense	Glu	within gene boundary	14674	14707	14674	14742	CCA
CAACTTAACTTGACCGCTCTGACCA	369.335	-2.23591	0.594692	-3.75978	0.000170063	0.00208149	hsa|mt-sRNA|Val|H|1649|tRF-5|25|CCA	hsa|mt-sRNA|Val|H|1649-CCA	tRF-5	CCA_0_mismatch	Mt_tRNA	H	sense	Val	within gene boundary	1649	1670	1602	1670	CCA
CAACTTACACTTAGGAGATTTCAACTTAACTTGACCGCTCTGACCA	682.028	-1.84126	0.549041	-3.3536	0.000797673	0.00749765	hsa|mt-sRNA|Val|H|1628|tRF-5|46|CCA	hsa|mt-sRNA|Val|H|1628-CCA	tRF-5	CCA_0_mismatch	Mt_tRNA	H	sense	Val	within gene boundary	1628	1670	1602	1670	CCA
ATTGGTCGTGGTTGTAGTCCGTGCGAGAATACCA	4356.63	-1.80079	0.60499	-2.97657	0.00291494	0.021666	hsa|mt-sRNA|Glu|L|14674|tRH-3|34|CCA	hsa|mt-sRNA|Glu|L|14674-CCA	tRNA-half-3	CCA_0_mismatch	Mt_tRNA	L	sense	Glu	within gene boundary	14674	14704	14674	14742	CCA
ATTTCAACTTAACTTGACCGCTCTGACCA	58.21	-2.06479	0.579007	-3.56609	0.000362345	0.00393953	hsa|mt-sRNA|Val|H|1645|tRF-5|29|CCA	hsa|mt-sRNA|Val|H|1645-CCA	tRF-5	CCA_0_mismatch	Mt_tRNA	H	sense	Val	within gene boundary	1645	1670	1602	1670	CCA
CACCCAACTTACACTTAGGAGATTTCAACTTAACTTGACCGCTCTGACCA	99.8835	-1.54587	0.620527	-2.49122	0.0127306	0.0682975	hsa|mt-sRNA|Val|H|1624|tRF-5|50|CCA	hsa|mt-sRNA|Val|H|1624-CCA	tRF-5	CCA_0_mismatch	Mt_tRNA	H	sense	Val	within gene boundary	1624	1670	1602	1670	CCA
CACCCCATAAACACCA	90.9905	2.05141	0.696456	2.9455	0.0032243	0.0236218	hsa|mt-sRNA|Phe|H|635|tRF-5|16|CCA	hsa|mt-sRNA|Phe|H|635-CCA	tRF-5	CCA_0_mismatch	Mt_tRNA	H	sense	Phe	within gene boundary	635	647	577	647	CCA
CCAACTTACACTTAGGAGATTTCAACTTAACTTGACCGCTCTGACCA	322.848	-1.7471	0.572312	-3.05271	0.00226782	0.0174921	hsa|mt-sRNA|Val|H|1627|tRF-5|47|CCA	hsa|mt-sRNA|Val|H|1627-CCA	tRF-5	CCA_0_mismatch	Mt_tRNA	H	sense	Val	within gene boundary	1627	1670	1602	1670	CCA
CCTCTTTACAGTGACCA	56.3618	2.23746	0.701944	3.18753	0.00143495	0.0120702	hsa|mt-sRNA|Lys|H|8351|tRF-5|17|CCA	hsa|mt-sRNA|Lys|H|8351-CCA	tRF-5	CCA_0_mismatch	Mt_tRNA	H	sense	Lys	within gene boundary	8351	8364	8295	8364	CCA
CTTAACTTGACCGCTCTGACCA	74.5624	-1.45113	0.573507	-2.53027	0.0113974	0.0634091	hsa|mt-sRNA|Val|H|1652|tRF-5|22|CCA	hsa|mt-sRNA|Val|H|1652-CCA	tRF-5	CCA_0_mismatch	Mt_tRNA	H	sense	Val	within gene boundary	1652	1670	1602	1670	CCA
GATGGTTTTTCATATCATTGGTCGTGGTTGTAGTCCGTGCGAGAATACCA	54.6074	-2.60064	0.607583	-4.28031	1.86636e-05	0.000280504	hsa|mt-sRNA|Glu|L|14674|tRF-3|50|CCA	hsa|mt-sRNA|Glu|L|14674-CCA	tRF-3	CCA_0_mismatch	Mt_tRNA	L	sense	Glu	within gene boundary	14674	14720	14674	14742	CCA
GATTTCAACTTAACTTGACCGCTCTGACCA	374.631	-2.58552	0.64568	-4.00433	6.21928e-05	0.000864776	hsa|mt-sRNA|Val|H|1644|tRF-5|30|CCA	hsa|mt-sRNA|Val|H|1644-CCA	tRF-5	CCA_0_mismatch	Mt_tRNA	H	sense	Val	within gene boundary	1644	1670	1602	1670	CCA
GAGATTTCAACTTAACTTGACCGCTCTGACCA	148.046	-2.68957	0.584278	-4.60323	4.15981e-06	7.26722e-05	hsa|mt-sRNA|Val|H|1642|tRH-5|32|CCA	hsa|mt-sRNA|Val|H|1642-CCA	tRNA-half-5	CCA_0_mismatch	Mt_tRNA	H	sense	Val	within gene boundary	1642	1670	1602	1670	CCA
GGAGATTTCAACTTAACTTGACCGCTCTGACCA	288.043	-1.55043	0.563124	-2.75327	0.00590027	0.0381324	hsa|mt-sRNA|Val|H|1641|tRH-5|33|CCA	hsa|mt-sRNA|Val|H|1641-CCA	tRNA-half-5	CCA_0_mismatch	Mt_tRNA	H	sense	Val	within gene boundary	1641	1670	1602	1670	CCA
GCCCCCATGTCTAACAACATGGCTTTCTCACCA	25.993	-3.30345	0.828816	-3.98574	6.72687e-05	0.000904587	hsa|mt-sRNA|Ser2|H|12236|tRF-5|33|CCA	hsa|mt-sRNA|Ser2|H|12236-CCA	tRF-5	CCA_0_mismatch	Mt_tRNA	H	sense	Ser2	within gene boundary	12236	12265	12207	12265	CCA
GGTAAAATGGCTGAGTGAAGCATTGGACTGTACCA	91.1694	-1.55462	0.671418	-2.31542	0.0205897	0.097195	hsa|mt-sRNA|Tyr|L|5860|tRF-5|35|CCA	hsa|mt-sRNA|Tyr|L|5860-CCA	tRF-5	CCA_0_mismatch	Mt_tRNA	L	sense	Tyr	within gene boundary	5860	5891	5826	5891	CCA
GGTTTTTCATATCATTGGTCGTGGTTGTAGTCCGTGCGAGAATACCA	33.4664	-1.59362	0.654256	-2.43577	0.01486	0.0768959	hsa|mt-sRNA|Glu|L|14674|tRF-3|47|CCA	hsa|mt-sRNA|Glu|L|14674-CCA	tRF-3	CCA_0_mismatch	Mt_tRNA	L	sense	Glu	within gene boundary	14674	14717	14674	14742	CCA
GTTTGTGGGTTTAAGTCCCATTGGTCTAGCCA	64.1989	-2.22423	0.821828	-2.70644	0.0068008	0.0426454	hsa|mt-sRNA|Asn|L|5657|tRF-3|32|CCA	hsa|mt-sRNA|Asn|L|5657-CCA	tRF-3	CCA_0_mismatch	Mt_tRNA	L	sense	Asn	within gene boundary	5657	5685	5657	5729	CCA
GTTTTTCATATCATTGGTCGTGGTTGTAGTCCGTGCGAGAATACCA	285.95	-1.49679	0.572477	-2.61459	0.00893335	0.0524857	hsa|mt-sRNA|Glu|L|14674|tRF-3|46|CCA	hsa|mt-sRNA|Glu|L|14674-CCA	tRF-3	CCA_0_mismatch	Mt_tRNA	L	sense	Glu	within gene boundary	14674	14716	14674	14742	CCA
TAACTTGACCGCTCTGACCA	146.35	-1.50567	0.52494	-2.86827	0.00412722	0.0285968	hsa|mt-sRNA|Val|H|1654|tRF-5|20|CCA	hsa|mt-sRNA|Val|H|1654-CCA	tRF-5	CCA_0_mismatch	Mt_tRNA	H	sense	Val	within gene boundary	1654	1670	1602	1670	CCA
TATCATTGGTCGTGGTTGTAGTCCGTGCGAGAATACCA	809.926	-1.39953	0.591604	-2.36566	0.0179979	0.0875899	hsa|mt-sRNA|Glu|L|14674|tRF-3|38|CCA	hsa|mt-sRNA|Glu|L|14674-CCA	tRF-3	CCA_0_mismatch	Mt_tRNA	L	sense	Glu	within gene boundary	14674	14708	14674	14742	CCA
TACACTTAGGAGATTTCAACTTAACTTGACCGCTCTGACCA	92.562	-1.58592	0.557701	-2.84368	0.00445964	0.0306919	hsa|mt-sRNA|Val|H|1633|tRF-5|41|CCA	hsa|mt-sRNA|Val|H|1633-CCA	tRF-5	CCA_0_mismatch	Mt_tRNA	H	sense	Val	within gene boundary	1633	1670	1602	1670	CCA
TCAACTTAACTTGACCGCTCTGACCA	298.374	-2.69612	0.587138	-4.59197	4.39087e-06	7.60587e-05	hsa|mt-sRNA|Val|H|1648|tRF-5|26|CCA	hsa|mt-sRNA|Val|H|1648-CCA	tRF-5	CCA_0_mismatch	Mt_tRNA	H	sense	Val	within gene boundary	1648	1670	1602	1670	CCA
TCATTGGTCGTGGTTGTAGTCCGTGCGAGAATACCA	171.024	-2.18573	0.523806	-4.17279	3.00892e-05	0.000439303	hsa|mt-sRNA|Glu|L|14674|tRH-3|36|CCA	hsa|mt-sRNA|Glu|L|14674-CCA	tRNA-half-3	CCA_0_mismatch	Mt_tRNA	L	sense	Glu	within gene boundary	14674	14706	14674	14742	CCA
TCATATCATTGGTCGTGGTTGTAGTCCGTGCGAGAATACCA	311.269	-2.13735	0.542189	-3.94208	8.07789e-05	0.00104501	hsa|mt-sRNA|Glu|L|14674|tRF-3|41|CCA	hsa|mt-sRNA|Glu|L|14674-CCA	tRF-3	CCA_0_mismatch	Mt_tRNA	L	sense	Glu	within gene boundary	14674	14711	14674	14742	CCA
TCGTGGTTGTAGTCCGTGCGAGAATACCA	2232.69	-1.67195	0.685204	-2.44008	0.0146841	0.0761783	hsa|mt-sRNA|Glu|L|14674|tRF-3|29|CCA	hsa|mt-sRNA|Glu|L|14674-CCA	tRF-3	CCA_0_mismatch	Mt_tRNA	L	sense	Glu	within gene boundary	14674	14699	14674	14742	CCA
TGGTCGTGGTTGTAGTCCGTGCGAGAATACCA	968.261	-2.23631	0.551626	-4.05404	5.03405e-05	0.000709627	hsa|mt-sRNA|Glu|L|14674|tRH-3|32|CCA	hsa|mt-sRNA|Glu|L|14674-CCA	tRNA-half-3	CCA_0_mismatch	Mt_tRNA	L	sense	Glu	within gene boundary	14674	14702	14674	14742	CCA
TTAACTTGACCGCTCTGACCA	245.534	-2.42875	0.561335	-4.32674	1.51335e-05	0.000236128	hsa|mt-sRNA|Val|H|1653|tRF-5|21|CCA	hsa|mt-sRNA|Val|H|1653-CCA	tRF-5	CCA_0_mismatch	Mt_tRNA	H	sense	Val	within gene boundary	1653	1670	1602	1670	CCA
TTAAGAGAACCAACACCTCTTTACAGTGACCA	119.282	-1.5521	0.57196	-2.71365	0.00665459	0.0421114	hsa|mt-sRNA|Lys|H|8336|tRF-5|32|CCA	hsa|mt-sRNA|Lys|H|8336-CCA	tRF-5	CCA_0_mismatch	Mt_tRNA	H	sense	Lys	within gene boundary	8336	8364	8295	8364	CCA
TTAGGAGATTTCAACTTAACTTGACCGCTCTGACCA	28.0816	-1.4697	0.588049	-2.49929	0.0124444	0.0672853	hsa|mt-sRNA|Val|H|1638|tRH-5|36|CCA	hsa|mt-sRNA|Val|H|1638-CCA	tRNA-half-5	CCA_0_mismatch	Mt_tRNA	H	sense	Val	within gene boundary	1638	1670	1602	1670	CCA
TTACACTTAGGAGATTTCAACTTAACTTGACCGCTCTGACCA	79.4769	-1.60542	0.558084	-2.87666	0.00401913	0.0282306	hsa|mt-sRNA|Val|H|1632|tRF-5|42|CCA	hsa|mt-sRNA|Val|H|1632-CCA	tRF-5	CCA_0_mismatch	Mt_tRNA	H	sense	Val	within gene boundary	1632	1670	1602	1670	CCA
TTCAACTTAACTTGACCGCTCTGACCA	135.138	-1.65277	0.59152	-2.79411	0.00520434	0.0345379	hsa|mt-sRNA|Val|H|1647|tRF-5|27|CCA	hsa|mt-sRNA|Val|H|1647-CCA	tRF-5	CCA_0_mismatch	Mt_tRNA	H	sense	Val	within gene boundary	1647	1670	1602	1670	CCA
TTCATATCATTGGTCGTGGTTGTAGTCCGTGCGAGAATACCA	201.73	-2.42625	0.583686	-4.15677	3.2278e-05	0.000464621	hsa|mt-sRNA|Glu|L|14674|tRF-3|42|CCA	hsa|mt-sRNA|Glu|L|14674-CCA	tRF-3	CCA_0_mismatch	Mt_tRNA	L	sense	Glu	within gene boundary	14674	14712	14674	14742	CCA
TTTCCAAGGACACCA	679.02	2.19488	0.633428	3.46509	0.000530054	0.00523397	hsa|mt-sRNA|Thr|H|15942|tRF-5|15|CCA	hsa|mt-sRNA|Thr|H|15942-CCA	tRF-5	CCA_0_mismatch	Mt_tRNA	H	sense	Thr	within gene boundary	15942	15953	15888	15953	CCA
TTTCAACTTAACTTGACCGCTCTGACCA	369.817	-1.96035	0.601547	-3.25885	0.00111866	0.00989847	hsa|mt-sRNA|Val|H|1646|tRF-5|28|CCA	hsa|mt-sRNA|Val|H|1646-CCA	tRF-5	CCA_0_mismatch	Mt_tRNA	H	sense	Val	within gene boundary	1646	1670	1602	1670	CCA
TTTTCATATCATTGGTCGTGGTTGTAGTCCGTGCGAGAATACCA	112.253	-1.65414	0.564161	-2.93204	0.00336739	0.0244076	hsa|mt-sRNA|Glu|L|14674|tRF-3|44|CCA	hsa|mt-sRNA|Glu|L|14674-CCA	tRF-3	CCA_0_mismatch	Mt_tRNA	L	sense	Glu	within gene boundary	14674	14714	14674	14742	CCA
TTTTTCATATCATTGGTCGTGGTTGTAGTCCGTGCGAGAATACCA	129.663	-1.50766	0.610005	-2.47154	0.0134531	0.0712385	hsa|mt-sRNA|Glu|L|14674|tRF-3|45|CCA	hsa|mt-sRNA|Glu|L|14674-CCA	tRF-3	CCA_0_mismatch	Mt_tRNA	L	sense	Glu	within gene boundary	14674	14715	14674	14742	CCA
