# Supplementary material for: mtR_find: A Parallel Processing Tool to Identify and Annotate RNAs Derived from the Mitochondrial Genome
Source: Int J Mol Sci. 2023 Feb 22;24(5):4373. doi: 10.3390/ijms24054373 (PMC10001721; doi:10.3390/ijms24054373)
Supplement: Supplementary file 1 [file ijms-24-04373-s001.zip › Supplementary File S10.csv]

sequence	baseMean	log2FoldChange	lfcSE	stat	pvalue	padj	Specific-ID	General-ID	subtype	type	bio-type	strand	orientation	annotation	Sequence alignment	Sequence start position(bp)	Sequence end position(bp)	gene-boundary:start(bp)	gene-boundary:end(bp)	substitutions
AACACAGCAAGACGAGAAGACCCTATGGAGC	9.336028838	-7.289710082	1.394216931	-5.228533609	1.71E-07	3.50E-05	hsa|mt-sRNA|mtLSU rRNA|H|2706|i-3p|31|	hsa|mt-sRNA|mtLSU rRNA|H|2706	i-3prime	normal_1_mismatch	Mt_rRNA	H	sense	mtLSU rRNA	within gene boundary	2706	2736	1671	3229
AACACAGCAAGACGAGAAGACCCTATGGAGCT	35.92894343	-9.19892841	1.327614651	-6.928914501	4.24E-12	3.12E-09	hsa|mt-sRNA|mtLSU rRNA|H|2706|i-3p|32|	hsa|mt-sRNA|mtLSU rRNA|H|2706	i-3prime	normal_1_mismatch	Mt_rRNA	H	sense	mtLSU rRNA	within gene boundary	2706	2737	1671	3229
AACACAGCAAGACGAGAAGACCCTATGGAGCTT	35.49719862	-8.218447246	1.317159419	-6.239523574	4.39E-10	1.94E-07	hsa|mt-sRNA|mtLSU rRNA|H|2706|i-3p|33|	hsa|mt-sRNA|mtLSU rRNA|H|2706	i-3prime	normal_1_mismatch	Mt_rRNA	H	sense	mtLSU rRNA	within gene boundary	2706	2738	1671	3229
AAGAGGCGGGCATAACACAGCA	16.60093185	-8.091059992	1.329293783	-6.086735749	1.15E-09	4.23E-07	hsa|mt-sRNA|mtLSU rRNA|H|2693|i-3p|22|	hsa|mt-sRNA|mtLSU rRNA|H|2693	i-3prime	normal_1_mismatch	Mt_rRNA	H	sense	mtLSU rRNA	within gene boundary	2693	2714	1671	3229
AAGAGGCGGGCATAACACAGCAAGACGAGAAGACCCTATGGA	8.932523014	-7.139675324	1.557111477	-4.585204997	4.54E-06	0.000726903	hsa|mt-sRNA|mtLSU rRNA|H|2693|i-3p|42|	hsa|mt-sRNA|mtLSU rRNA|H|2693	i-3prime	normal_1_mismatch	Mt_rRNA	H	sense	mtLSU rRNA	within gene boundary	2693	2734	1671	3229
AAGAGGCGGGCATGACACAGCA	23.71032052	7.474538733	1.314092139	5.687986792	1.29E-08	3.56E-06	hsa|mt-sRNA|mtLSU rRNA|H|2693|i-3p|22|13A8	hsa|mt-sRNA|mtLSU rRNA|H|2693	i-3prime	normal_1_mismatch	Mt_rRNA	H	sense	mtLSU rRNA	within gene boundary	2693	2714	1671	3229	13A8
AAGAGGCGGGCATGACACAGCAAGACGAGAAGACCCTATGGA	10.78251362	6.331471808	1.404219989	4.508888818	6.52E-06	0.001007818	hsa|mt-sRNA|mtLSU rRNA|H|2693|i-3p|42|13A28	hsa|mt-sRNA|mtLSU rRNA|H|2693	i-3prime	normal_1_mismatch	Mt_rRNA	H	sense	mtLSU rRNA	within gene boundary	2693	2734	1671	3229	13A28
AGGCGGGCATGACACAGCA	8.830381345	6.045171708	1.360775941	4.442444585	8.89E-06	0.001328862	hsa|mt-sRNA|mtLSU rRNA|H|2696|i-3p|19|10A8	hsa|mt-sRNA|mtLSU rRNA|H|2696	i-3prime	normal_1_mismatch	Mt_rRNA	H	sense	mtLSU rRNA	within gene boundary	2696	2714	1671	3229	10A8
AGGCGGGCATGACACAGCAAGACGAGAAGACCCTATGGAGCT	5.2244675	5.286441559	1.418584273	3.726561515	0.00019411	0.024099678	hsa|mt-sRNA|mtLSU rRNA|H|2696|i-3p|42|10A31	hsa|mt-sRNA|mtLSU rRNA|H|2696	i-3prime	normal_1_mismatch	Mt_rRNA	H	sense	mtLSU rRNA	within gene boundary	2696	2737	1671	3229	10A31
ATAACACAGCAAGACGAG	10.1057107	-7.363637537	1.434461246	-5.133381997	2.85E-07	5.34E-05	hsa|mt-sRNA|mtLSU rRNA|H|2704|i-3p|18|	hsa|mt-sRNA|mtLSU rRNA|H|2704	i-3prime	normal_1_mismatch	Mt_rRNA	H	sense	mtLSU rRNA	within gene boundary	2704	2721	1671	3229
ATAACACAGCAAGACGAGA	11.76188236	-7.586603611	1.392573525	-5.447901655	5.10E-08	1.25E-05	hsa|mt-sRNA|mtLSU rRNA|H|2704|i-3p|19|	hsa|mt-sRNA|mtLSU rRNA|H|2704	i-3prime	normal_1_mismatch	Mt_rRNA	H	sense	mtLSU rRNA	within gene boundary	2704	2722	1671	3229
ATAACACAGCAAGACGAGAAGACCCTATGG	10.59112977	-7.43265431	1.353352382	-5.492031796	3.97E-08	1.00E-05	hsa|mt-sRNA|mtLSU rRNA|H|2704|i-3p|30|	hsa|mt-sRNA|mtLSU rRNA|H|2704	i-3prime	normal_1_mismatch	Mt_rRNA	H	sense	mtLSU rRNA	within gene boundary	2704	2733	1671	3229
ATAACACAGCAAGACGAGAAGACCCTATGGA	8.564105319	-7.123485137	1.37480293	-5.181459089	2.20E-07	4.41E-05	hsa|mt-sRNA|mtLSU rRNA|H|2704|i-3p|31|	hsa|mt-sRNA|mtLSU rRNA|H|2704	i-3prime	normal_1_mismatch	Mt_rRNA	H	sense	mtLSU rRNA	within gene boundary	2704	2734	1671	3229
ATAACACAGCAAGACGAGAAGACCCTATGGAG	4.59337299	-6.260717228	1.474674231	-4.245491714	2.18E-05	0.002913151	hsa|mt-sRNA|mtLSU rRNA|H|2704|i-3p|32|	hsa|mt-sRNA|mtLSU rRNA|H|2704	i-3prime	normal_1_mismatch	Mt_rRNA	H	sense	mtLSU rRNA	within gene boundary	2704	2735	1671	3229
ATAACACAGCAAGACGAGAAGACCCTATGGAGC	29.70735908	-8.922164885	1.324940891	-6.734009754	1.65E-11	1.04E-08	hsa|mt-sRNA|mtLSU rRNA|H|2704|i-3p|33|	hsa|mt-sRNA|mtLSU rRNA|H|2704	i-3prime	normal_1_mismatch	Mt_rRNA	H	sense	mtLSU rRNA	within gene boundary	2704	2736	1671	3229
ATAACACAGCAAGACGAGAAGACCCTATGGAGCC	16.28583819	-8.039586218	1.344325268	-5.980387639	2.23E-09	7.55E-07	hsa|mt-sRNA|mtLSU rRNA|H|2704|i-3p|34|33T0	hsa|mt-sRNA|mtLSU rRNA|H|2704	i-3prime	normal_1_mismatch	Mt_rRNA	H	sense	mtLSU rRNA	within gene boundary	2704	2737	1671	3229	33T0
ATAACACAGCAAGACGAGAAGACCCTATGGAGCT	95.1245527	-9.637504294	1.317534032	-7.314804822	2.58E-13	2.72E-10	hsa|mt-sRNA|mtLSU rRNA|H|2704|i-3p|34|	hsa|mt-sRNA|mtLSU rRNA|H|2704	i-3prime	normal_1_mismatch	Mt_rRNA	H	sense	mtLSU rRNA	within gene boundary	2704	2737	1671	3229
ATAACACAGCAAGACGAGAAGACCCTATGGAGCTC	17.35489214	-8.140266197	1.328349929	-6.128103763	8.89E-10	3.56E-07	hsa|mt-sRNA|mtLSU rRNA|H|2704|i-3p|35|34T0	hsa|mt-sRNA|mtLSU rRNA|H|2704	i-3prime	normal_1_mismatch	Mt_rRNA	H	sense	mtLSU rRNA	within gene boundary	2704	2738	1671	3229	34T0
ATAACACAGCAAGACGAGAAGACCCTATGGAGCTT	105.3062328	-10.75035366	1.294875152	-8.302231794	1.02E-16	3.00E-13	hsa|mt-sRNA|mtLSU rRNA|H|2704|i-3p|35|	hsa|mt-sRNA|mtLSU rRNA|H|2704	i-3prime	normal_1_mismatch	Mt_rRNA	H	sense	mtLSU rRNA	within gene boundary	2704	2738	1671	3229
ATAACACAGCAAGACGAGAAGACCCTATGGAGCTTT	9.30927776	-7.249568663	1.403705015	-5.164595543	2.41E-07	4.66E-05	hsa|mt-sRNA|mtLSU rRNA|H|2704|i-3p|36|	hsa|mt-sRNA|mtLSU rRNA|H|2704	i-3prime	normal_1_mismatch	Mt_rRNA	H	sense	mtLSU rRNA	within gene boundary	2704	2739	1671	3229
ATGACACAGCAAGACGAGAAGACCCTATGGAGCT	90.19235879	9.402302183	1.287147593	7.304758392	2.78E-13	2.72E-10	hsa|mt-sRNA|mtLSU rRNA|H|2704|i-3p|34|2A31	hsa|mt-sRNA|mtLSU rRNA|H|2704	i-3prime	normal_1_mismatch	Mt_rRNA	H	sense	mtLSU rRNA	within gene boundary	2704	2737	1671	3229	2A31
ATGACACAGCAAGACGAGAAGACCCTATGGAGCTT	168.8158398	8.497299992	1.116792668	7.608663844	2.77E-14	4.07E-11	hsa|mt-sRNA|mtLSU rRNA|H|2704|i-3p|35|2A32	hsa|mt-sRNA|mtLSU rRNA|H|2704	i-3prime	normal_1_mismatch	Mt_rRNA	H	sense	mtLSU rRNA	within gene boundary	2704	2738	1671	3229	2A32
ATGACACAGCAAGACGAGAAGACCCTATGGAGCTTT	13.89159341	6.70205364	1.325567331	5.055988848	4.28E-07	7.79E-05	hsa|mt-sRNA|mtLSU rRNA|H|2704|i-3p|36|2A33	hsa|mt-sRNA|mtLSU rRNA|H|2704	i-3prime	normal_1_mismatch	Mt_rRNA	H	sense	mtLSU rRNA	within gene boundary	2704	2739	1671	3229	2A33
ATGACACAGCAAGACGAGAAGACCCTATGGAGCTTTAAT	8.190622799	5.937658712	1.3602409	4.365152316	1.27E-05	0.00180614	hsa|mt-sRNA|mtLSU rRNA|H|2704|i-3p|39|2A36	hsa|mt-sRNA|mtLSU rRNA|H|2704	i-3prime	normal_1_mismatch	Mt_rRNA	H	sense	mtLSU rRNA	within gene boundary	2704	2742	1671	3229	2A36
ATGACACAGCAAGACG	6.098541084	5.517285818	1.385200529	3.983023182	6.80E-05	0.008692882	hsa|mt-sRNA|mtLSU rRNA|H|2704|i-3p|16|2A13	hsa|mt-sRNA|mtLSU rRNA|H|2704	i-3prime	normal_1_mismatch	Mt_rRNA	H	sense	mtLSU rRNA	within gene boundary	2704	2719	1671	3229	2A13
ATGACACAGCAAGACGAG	11.23571074	6.39684183	1.351409364	4.733459751	2.21E-06	0.000360313	hsa|mt-sRNA|mtLSU rRNA|H|2704|i-3p|18|2A15	hsa|mt-sRNA|mtLSU rRNA|H|2704	i-3prime	normal_1_mismatch	Mt_rRNA	H	sense	mtLSU rRNA	within gene boundary	2704	2721	1671	3229	2A15
ATGACACAGCAAGACGAGA	17.68852021	7.052131331	1.316321493	5.357453605	8.44E-08	1.88E-05	hsa|mt-sRNA|mtLSU rRNA|H|2704|i-3p|19|2A16	hsa|mt-sRNA|mtLSU rRNA|H|2704	i-3prime	normal_1_mismatch	Mt_rRNA	H	sense	mtLSU rRNA	within gene boundary	2704	2722	1671	3229	2A16
ATGACACAGCAAGACGAGAA	8.628990746	6.021554463	1.362732704	4.418734829	9.93E-06	0.001446169	hsa|mt-sRNA|mtLSU rRNA|H|2704|i-3p|20|2A17	hsa|mt-sRNA|mtLSU rRNA|H|2704	i-3prime	normal_1_mismatch	Mt_rRNA	H	sense	mtLSU rRNA	within gene boundary	2704	2723	1671	3229	2A17
ATGACACAGCAAGACGAGAAGACCCTATGG	7.818125826	5.876493156	1.35696223	4.330623967	1.49E-05	0.002080444	hsa|mt-sRNA|mtLSU rRNA|H|2704|i-3p|30|2A27	hsa|mt-sRNA|mtLSU rRNA|H|2704	i-3prime	normal_1_mismatch	Mt_rRNA	H	sense	mtLSU rRNA	within gene boundary	2704	2733	1671	3229	2A27
ATGACACAGCAAGACGAGAAGACCCTATGGAGC	40.88142852	8.260576797	1.307124982	6.31965337	2.62E-10	1.28E-07	hsa|mt-sRNA|mtLSU rRNA|H|2704|i-3p|33|2A30	hsa|mt-sRNA|mtLSU rRNA|H|2704	i-3prime	normal_1_mismatch	Mt_rRNA	H	sense	mtLSU rRNA	within gene boundary	2704	2736	1671	3229	2A30
CATAACACAGCAAGACGAGAAGACCCTATGGAGCT	9.281510895	-7.222872118	1.377283099	-5.244290096	1.57E-07	3.29E-05	hsa|mt-sRNA|mtLSU rRNA|H|2703|i-3p|35|	hsa|mt-sRNA|mtLSU rRNA|H|2703	i-3prime	normal_1_mismatch	Mt_rRNA	H	sense	mtLSU rRNA	within gene boundary	2703	2737	1671	3229
CATAACACAGCAAGACGAGAAGACCCTATGGAGCTT	13.64739602	-7.781996681	1.354403381	-5.745700868	9.15E-09	2.78E-06	hsa|mt-sRNA|mtLSU rRNA|H|2703|i-3p|36|	hsa|mt-sRNA|mtLSU rRNA|H|2703	i-3prime	normal_1_mismatch	Mt_rRNA	H	sense	mtLSU rRNA	within gene boundary	2703	2738	1671	3229
CATGACACAGCAAGACGAGAAGACCCTATGGAGCT	9.330369863	6.129726898	1.347187942	4.550016155	5.36E-06	0.000844379	hsa|mt-sRNA|mtLSU rRNA|H|2703|i-3p|35|3A31	hsa|mt-sRNA|mtLSU rRNA|H|2703	i-3prime	normal_1_mismatch	Mt_rRNA	H	sense	mtLSU rRNA	within gene boundary	2703	2737	1671	3229	3A31
CATGACACAGCAAGACGAGAAGACCCTATGGAGCTT	16.90322095	6.988867931	1.322330237	5.28526667	1.26E-07	2.70E-05	hsa|mt-sRNA|mtLSU rRNA|H|2703|i-3p|36|3A32	hsa|mt-sRNA|mtLSU rRNA|H|2703	i-3prime	normal_1_mismatch	Mt_rRNA	H	sense	mtLSU rRNA	within gene boundary	2703	2738	1671	3229	3A32
CGGGCATGACACAGCA	7.77969963	5.872200397	1.37104259	4.283018222	1.84E-05	0.002539478	hsa|mt-sRNA|mtLSU rRNA|H|2699|i-3p|16|7A8	hsa|mt-sRNA|mtLSU rRNA|H|2699	i-3prime	normal_1_mismatch	Mt_rRNA	H	sense	mtLSU rRNA	within gene boundary	2699	2714	1671	3229	7A8
GACACAGCAAGACGAGAAGACCCTATGGAGC	6.504476751	5.605243295	1.384224542	4.049374305	5.14E-05	0.006657237	hsa|mt-sRNA|mtLSU rRNA|H|2706|i-3p|31|0A30	hsa|mt-sRNA|mtLSU rRNA|H|2706	i-3prime	normal_1_mismatch	Mt_rRNA	H	sense	mtLSU rRNA	within gene boundary	2706	2736	1671	3229	0A30
GACACAGCAAGACGAGAAGACCCTATGGAGCT	15.59285967	6.870950508	1.330876403	5.162726225	2.43E-07	4.66E-05	hsa|mt-sRNA|mtLSU rRNA|H|2706|i-3p|32|0A31	hsa|mt-sRNA|mtLSU rRNA|H|2706	i-3prime	normal_1_mismatch	Mt_rRNA	H	sense	mtLSU rRNA	within gene boundary	2706	2737	1671	3229	0A31
GACACAGCAAGACGAGAAGACCCTATGGAGCTT	28.15915101	7.722888909	1.309291514	5.898525137	3.67E-09	1.20E-06	hsa|mt-sRNA|mtLSU rRNA|H|2706|i-3p|33|0A32	hsa|mt-sRNA|mtLSU rRNA|H|2706	i-3prime	normal_1_mismatch	Mt_rRNA	H	sense	mtLSU rRNA	within gene boundary	2706	2738	1671	3229	0A32
GCATGACACAGCAAGACGAGAAGACCCTATGGAGCTT	6.716201186	5.654405829	1.370504168	4.125785211	3.69E-05	0.004861038	hsa|mt-sRNA|mtLSU rRNA|H|2702|i-3p|37|4A32	hsa|mt-sRNA|mtLSU rRNA|H|2702	i-3prime	normal_1_mismatch	Mt_rRNA	H	sense	mtLSU rRNA	within gene boundary	2702	2738	1671	3229	4A32
GCGGGCATGACACAGCA	9.256313108	6.118918403	1.360417933	4.497822511	6.87E-06	0.001043407	hsa|mt-sRNA|mtLSU rRNA|H|2698|i-3p|17|8A8	hsa|mt-sRNA|mtLSU rRNA|H|2698	i-3prime	normal_1_mismatch	Mt_rRNA	H	sense	mtLSU rRNA	within gene boundary	2698	2714	1671	3229	8A8
GGCGGGCATGACACAGCAAGACGAGAAGACCCTATGGAGCTT	4.483968896	5.069932426	1.519021026	3.337631499	0.000844957	0.099310647	hsa|mt-sRNA|mtLSU rRNA|H|2697|i-3p|42|9A32	hsa|mt-sRNA|mtLSU rRNA|H|2697	i-3prime	normal_1_mismatch	Mt_rRNA	H	sense	mtLSU rRNA	within gene boundary	2697	2738	1671	3229	9A32
GGCGGGCATGACACAGCA	23.59683153	7.468515857	1.304819869	5.723790719	1.04E-08	3.06E-06	hsa|mt-sRNA|mtLSU rRNA|H|2697|i-3p|18|9A8	hsa|mt-sRNA|mtLSU rRNA|H|2697	i-3prime	normal_1_mismatch	Mt_rRNA	H	sense	mtLSU rRNA	within gene boundary	2697	2714	1671	3229	9A8
GGGCATGACACAGCAAGACGAGAAGACCCTATGGAGCTT	5.785181789	5.441114057	1.380372578	3.941772059	8.09E-05	0.010185333	hsa|mt-sRNA|mtLSU rRNA|H|2700|i-3p|39|6A32	hsa|mt-sRNA|mtLSU rRNA|H|2700	i-3prime	normal_1_mismatch	Mt_rRNA	H	sense	mtLSU rRNA	within gene boundary	2700	2738	1671	3229	6A32
GTGAAGAGGCGGGCATGACACAGCA	19.55223699	7.197445918	1.309460615	5.496496674	3.87E-08	1.00E-05	hsa|mt-sRNA|mtLSU rRNA|H|2690|i-3p|25|16A8	hsa|mt-sRNA|mtLSU rRNA|H|2690	i-3prime	normal_1_mismatch	Mt_rRNA	H	sense	mtLSU rRNA	within gene boundary	2690	2714	1671	3229	16A8
TAACACAGCAAGACG	8.933329385	-7.155015365	1.464681124	-4.885032821	1.03E-06	0.00017874	hsa|mt-sRNA|mtLSU rRNA|H|2705|i-3p|15|	hsa|mt-sRNA|mtLSU rRNA|H|2705	i-3prime	normal_1_mismatch	Mt_rRNA	H	sense	mtLSU rRNA	within gene boundary	2705	2719	1671	3229
TAACACAGCAAGACGAG	22.31932733	-8.499841658	1.382208984	-6.149462026	7.77E-10	3.26E-07	hsa|mt-sRNA|mtLSU rRNA|H|2705|i-3p|17|	hsa|mt-sRNA|mtLSU rRNA|H|2705	i-3prime	normal_1_mismatch	Mt_rRNA	H	sense	mtLSU rRNA	within gene boundary	2705	2721	1671	3229
TAACACAGCAAGACGAGA	28.17984655	-8.841083576	1.365346258	-6.47534171	9.46E-11	4.91E-08	hsa|mt-sRNA|mtLSU rRNA|H|2705|i-3p|18|	hsa|mt-sRNA|mtLSU rRNA|H|2705	i-3prime	normal_1_mismatch	Mt_rRNA	H	sense	mtLSU rRNA	within gene boundary	2705	2722	1671	3229
TAACACAGCAAGACGAGAA	15.0864804	-7.941872188	1.396455672	-5.68716383	1.29E-08	3.56E-06	hsa|mt-sRNA|mtLSU rRNA|H|2705|i-3p|19|	hsa|mt-sRNA|mtLSU rRNA|H|2705	i-3prime	normal_1_mismatch	Mt_rRNA	H	sense	mtLSU rRNA	within gene boundary	2705	2723	1671	3229
TAACACAGCAAGACGAGAAGACCCT	13.69170681	-7.791894521	1.375457929	-5.664945728	1.47E-08	3.93E-06	hsa|mt-sRNA|mtLSU rRNA|H|2705|i-3p|25|	hsa|mt-sRNA|mtLSU rRNA|H|2705	i-3prime	normal_1_mismatch	Mt_rRNA	H	sense	mtLSU rRNA	within gene boundary	2705	2729	1671	3229
TAACACAGCAAGACGAGAAGACCCTATG	8.069092026	-7.030294581	1.3910973	-5.053776311	4.33E-07	7.79E-05	hsa|mt-sRNA|mtLSU rRNA|H|2705|i-3p|28|	hsa|mt-sRNA|mtLSU rRNA|H|2705	i-3prime	normal_1_mismatch	Mt_rRNA	H	sense	mtLSU rRNA	within gene boundary	2705	2732	1671	3229
TAACACAGCAAGACGAGAAGACCCTATGG	34.10449391	-9.118846576	1.311346449	-6.953804298	3.56E-12	2.85E-09	hsa|mt-sRNA|mtLSU rRNA|H|2705|i-3p|29|	hsa|mt-sRNA|mtLSU rRNA|H|2705	i-3prime	normal_1_mismatch	Mt_rRNA	H	sense	mtLSU rRNA	within gene boundary	2705	2733	1671	3229
TAACACAGCAAGACGAGAAGACCCTATGGA	17.182938	-8.132572055	1.343723715	-6.052265032	1.43E-09	5.04E-07	hsa|mt-sRNA|mtLSU rRNA|H|2705|i-3p|30|	hsa|mt-sRNA|mtLSU rRNA|H|2705	i-3prime	normal_1_mismatch	Mt_rRNA	H	sense	mtLSU rRNA	within gene boundary	2705	2734	1671	3229
TAACACAGCAAGACGAGAAGACCCTATGGAG	9.917228616	-7.320298832	1.366969105	-5.355131146	8.55E-08	1.88E-05	hsa|mt-sRNA|mtLSU rRNA|H|2705|i-3p|31|	hsa|mt-sRNA|mtLSU rRNA|H|2705	i-3prime	normal_1_mismatch	Mt_rRNA	H	sense	mtLSU rRNA	within gene boundary	2705	2735	1671	3229
TAACACAGCAAGACGAGAAGACCCTATGGAGC	77.19250862	-9.33841764	1.296624183	-7.202100469	5.93E-13	5.23E-10	hsa|mt-sRNA|mtLSU rRNA|H|2705|i-3p|32|	hsa|mt-sRNA|mtLSU rRNA|H|2705	i-3prime	normal_1_mismatch	Mt_rRNA	H	sense	mtLSU rRNA	within gene boundary	2705	2736	1671	3229
TAACACAGCAAGACGAGAAGACCCTATGGAGCC	52.6327778	-8.779882297	1.30854299	-6.709662855	1.95E-11	1.15E-08	hsa|mt-sRNA|mtLSU rRNA|H|2705|i-3p|33|32T0	hsa|mt-sRNA|mtLSU rRNA|H|2705	i-3prime	normal_1_mismatch	Mt_rRNA	H	sense	mtLSU rRNA	within gene boundary	2705	2737	1671	3229	32T0
TAACACAGCAAGACGAGAAGACCCTATGGAGCT	267.3501574	-10.23056867	1.168209992	-8.757474039	2.00E-18	8.80E-15	hsa|mt-sRNA|mtLSU rRNA|H|2705|i-3p|33|	hsa|mt-sRNA|mtLSU rRNA|H|2705	i-3prime	normal_1_mismatch	Mt_rRNA	H	sense	mtLSU rRNA	within gene boundary	2705	2737	1671	3229
TAACACAGCAAGACGAGAAGACCCTATGGAGCTA	19.35066688	-8.302915035	1.330807205	-6.239006675	4.40E-10	1.94E-07	hsa|mt-sRNA|mtLSU rRNA|H|2705|i-3p|34|33T0	hsa|mt-sRNA|mtLSU rRNA|H|2705	i-3prime	normal_1_mismatch	Mt_rRNA	H	sense	mtLSU rRNA	within gene boundary	2705	2738	1671	3229	33T0
TAACACAGCAAGACGAGAAGACCCTATGGAGCTC	51.57312998	-9.71864023	1.300741785	-7.471613769	7.92E-14	9.98E-11	hsa|mt-sRNA|mtLSU rRNA|H|2705|i-3p|34|33T0	hsa|mt-sRNA|mtLSU rRNA|H|2705	i-3prime	normal_1_mismatch	Mt_rRNA	H	sense	mtLSU rRNA	within gene boundary	2705	2738	1671	3229	33T0
TAACACAGCAAGACGAGAAGACCCTATGGAGCTT	328.5476166	-8.737944931	0.741446995	-11.78498934	4.66E-32	4.11E-28	hsa|mt-sRNA|mtLSU rRNA|H|2705|i-3p|34|	hsa|mt-sRNA|mtLSU rRNA|H|2705	i-3prime	normal_1_mismatch	Mt_rRNA	H	sense	mtLSU rRNA	within gene boundary	2705	2738	1671	3229
TAACACAGCAAGACGAGAAGACCCTATGGAGCTTT	29.69450741	-8.912808246	1.349359491	-6.605214036	3.97E-11	2.19E-08	hsa|mt-sRNA|mtLSU rRNA|H|2705|i-3p|35|	hsa|mt-sRNA|mtLSU rRNA|H|2705	i-3prime	normal_1_mismatch	Mt_rRNA	H	sense	mtLSU rRNA	within gene boundary	2705	2739	1671	3229
TAACACAGCAAGACGAGAAGACCCTATGGAGCTTTA	6.774985304	-6.817700036	1.427291489	-4.77666972	1.78E-06	0.00029642	hsa|mt-sRNA|mtLSU rRNA|H|2705|i-3p|36|	hsa|mt-sRNA|mtLSU rRNA|H|2705	i-3prime	normal_1_mismatch	Mt_rRNA	H	sense	mtLSU rRNA	within gene boundary	2705	2740	1671	3229
TAACACAGCAAGACGAGAAGACCCTATGGAGCTTTAAT	17.04918328	-8.115852484	1.328503657	-6.109017799	1.00E-09	3.84E-07	hsa|mt-sRNA|mtLSU rRNA|H|2705|i-3p|38|	hsa|mt-sRNA|mtLSU rRNA|H|2705	i-3prime	normal_1_mismatch	Mt_rRNA	H	sense	mtLSU rRNA	within gene boundary	2705	2742	1671	3229
TGACACAGCAAGACGAGAAGACCCTATGGAGCTTTAAT	18.82699193	7.140239925	1.317398782	5.419953338	5.96E-08	1.42E-05	hsa|mt-sRNA|mtLSU rRNA|H|2705|i-3p|38|1A36	hsa|mt-sRNA|mtLSU rRNA|H|2705	i-3prime	normal_1_mismatch	Mt_rRNA	H	sense	mtLSU rRNA	within gene boundary	2705	2742	1671	3229	1A36
TGACACAGCAAGACGAGAAGACCCTATGGAGCTTTAATT	4.024486826	4.911755584	1.430679732	3.433162206	0.000596585	0.072039691	hsa|mt-sRNA|mtLSU rRNA|H|2705|i-3p|39|1A37	hsa|mt-sRNA|mtLSU rRNA|H|2705	i-3prime	normal_1_mismatch	Mt_rRNA	H	sense	mtLSU rRNA	within gene boundary	2705	2743	1671	3229	1A37
TGACACAGCAAGACGAG	12.14601866	6.510240172	1.335089517	4.876257428	1.08E-06	0.00018328	hsa|mt-sRNA|mtLSU rRNA|H|2705|i-3p|17|1A15	hsa|mt-sRNA|mtLSU rRNA|H|2705	i-3prime	normal_1_mismatch	Mt_rRNA	H	sense	mtLSU rRNA	within gene boundary	2705	2721	1671	3229	1A15
TGACACAGCAAGACGAGA	19.13496108	7.166490497	1.324507829	5.410681871	6.28E-08	1.46E-05	hsa|mt-sRNA|mtLSU rRNA|H|2705|i-3p|18|1A16	hsa|mt-sRNA|mtLSU rRNA|H|2705	i-3prime	normal_1_mismatch	Mt_rRNA	H	sense	mtLSU rRNA	within gene boundary	2705	2722	1671	3229	1A16
TGACACAGCAAGACGAGAA	14.79727586	5.822099237	1.318108424	4.41701087	1.00E-05	0.001446169	hsa|mt-sRNA|mtLSU rRNA|H|2705|i-3p|19|1A17	hsa|mt-sRNA|mtLSU rRNA|H|2705	i-3prime	normal_1_mismatch	Mt_rRNA	H	sense	mtLSU rRNA	within gene boundary	2705	2723	1671	3229	1A17
TGACACAGCAAGACGAGAAGACCCTATGG	12.83265811	6.590256073	1.342075217	4.910496811	9.08E-07	0.000160161	hsa|mt-sRNA|mtLSU rRNA|H|2705|i-3p|29|1A27	hsa|mt-sRNA|mtLSU rRNA|H|2705	i-3prime	normal_1_mismatch	Mt_rRNA	H	sense	mtLSU rRNA	within gene boundary	2705	2733	1671	3229	1A27
TGACACAGCAAGACGAGAAGACCCTATGGA	7.354260026	5.788943301	1.362101594	4.250008463	2.14E-05	0.002898948	hsa|mt-sRNA|mtLSU rRNA|H|2705|i-3p|30|1A28	hsa|mt-sRNA|mtLSU rRNA|H|2705	i-3prime	normal_1_mismatch	Mt_rRNA	H	sense	mtLSU rRNA	within gene boundary	2705	2734	1671	3229	1A28
TGACACAGCAAGACGAGAAGACCCTATGGAGC	57.445635	8.751021265	1.29447232	6.760300031	1.38E-11	9.34E-09	hsa|mt-sRNA|mtLSU rRNA|H|2705|i-3p|32|1A30	hsa|mt-sRNA|mtLSU rRNA|H|2705	i-3prime	normal_1_mismatch	Mt_rRNA	H	sense	mtLSU rRNA	within gene boundary	2705	2736	1671	3229	1A30
TGACACAGCAAGACGAGAAGACCCTATGGAGCT	156.3227007	10.1959735	1.281567303	7.955862698	1.78E-15	3.92E-12	hsa|mt-sRNA|mtLSU rRNA|H|2705|i-3p|33|1A31	hsa|mt-sRNA|mtLSU rRNA|H|2705	i-3prime	normal_1_mismatch	Mt_rRNA	H	sense	mtLSU rRNA	within gene boundary	2705	2737	1671	3229	1A31
TGACACAGCAAGACGAGAAGACCCTATGGAGCTT	262.398424	9.982810215	1.269181677	7.865548643	3.67E-15	6.48E-12	hsa|mt-sRNA|mtLSU rRNA|H|2705|i-3p|34|1A32	hsa|mt-sRNA|mtLSU rRNA|H|2705	i-3prime	normal_1_mismatch	Mt_rRNA	H	sense	mtLSU rRNA	within gene boundary	2705	2738	1671	3229	1A32
TGACACAGCAAGACGAGAAGACCCTATGGAGCTTT	26.9230259	7.658909253	1.302316559	5.88098892	4.08E-09	1.28E-06	hsa|mt-sRNA|mtLSU rRNA|H|2705|i-3p|35|1A33	hsa|mt-sRNA|mtLSU rRNA|H|2705	i-3prime	normal_1_mismatch	Mt_rRNA	H	sense	mtLSU rRNA	within gene boundary	2705	2739	1671	3229	1A33
TGACACAGCAAGACGAGAAGACCCTATGGAGCTTTA	4.640447223	5.125670502	1.408790804	3.638347502	0.000274393	0.033594091	hsa|mt-sRNA|mtLSU rRNA|H|2705|i-3p|36|1A34	hsa|mt-sRNA|mtLSU rRNA|H|2705	i-3prime	normal_1_mismatch	Mt_rRNA	H	sense	mtLSU rRNA	within gene boundary	2705	2740	1671	3229	1A34
GATTTCAACTTAACTTGACCGCTCTGACCA	92.8455349	3.004072981	0.893230847	3.363154094	0.000770573	0.091791951	hsa|mt-sRNA|Val|H|1644|tRF-5|30|CCA	hsa|mt-sRNA|Val|H|1644-CCA	tRF-5	CCA_0_mismatch	Mt_tRNA	H	sense	Val	within gene boundary	1644	1670	1602	1670	CCA
