# Supplementary material for: mtR_find: A Parallel Processing Tool to Identify and Annotate RNAs Derived from the Mitochondrial Genome
Source: Int J Mol Sci. 2023 Feb 22;24(5):4373. doi: 10.3390/ijms24054373 (PMC10001721; doi:10.3390/ijms24054373)
Supplement: Supplementary file 1 [file ijms-24-04373-s001.zip › Supplementary File S13.xlsx]

## Sheet: dataset-1
Run	SRA Sample	Sample name	Source name	tissue
SRR1273998	SRS603625	GSM1381481	Liver tissue from control subject	Liver
SRR1273999	SRS603626	GSM1381482	Liver tissue from control subject	Liver
SRR1274000	SRS603627	GSM1381483	Liver tissue from control subject	Liver
SRR1274001	SRS603628	GSM1381484	Liver tissue from control subject	Liver
SRR1274002	SRS603629	GSM1381485	Non-cancer liver tissue from patient with chronic hepatitis B and associated cancer	Non-cancer liver
SRR1274003	SRS603630	GSM1381486	Non-cancer liver tissue from patient with chronic hepatitis B and associated cancer	Non-cancer liver
SRR1274004	SRS603631	GSM1381487	Non-cancer liver tissue from patient with chronic hepatitis B and associated cancer	Non-cancer liver
SRR1274005	SRS603632	GSM1381488	Non-cancer liver tissue from patient with chronic hepatitis B and associated cancer	Non-cancer liver
SRR1274006	SRS603633	GSM1381489	Cancer tissue from patient with chronic hepatitis B associated cancer	Hepatocellular carcinoma tissue
SRR1274007	SRS603634	GSM1381490	Cancer tissue from patient with chronic hepatitis B associated cancer	Hepatocellular carcinoma tissue
SRR1274008	SRS603635	GSM1381491	Cancer tissue from patient with chronic hepatitis B associated cancer	Hepatocellular carcinoma tissue
SRR1274009	SRS603636	GSM1381492	Cancer tissue from patient with chronic hepatitis B associated cancer	Hepatocellular carcinoma tissue
SRR1274010	SRS603637	GSM1381493	Non-cancer liver tissue from patient with chronic hepatitis C and associated cancer	Non-cancer liver
SRR1274011	SRS603638	GSM1381494	Non-cancer liver tissue from patient with chronic hepatitis C and associated cancer	Non-cancer liver
SRR1274012	SRS603639	GSM1381495	Non-cancer liver tissue from patient with chronic hepatitis C and associated cancer	Non-cancer liver
SRR1274013	SRS603640	GSM1381496	Non-cancer liver tissue from patient with chronic hepatitis C and associated cancer	Non-cancer liver
SRR1274014	SRS603641	GSM1381497	Cancer tissue from patient with chronic hepatitis C associated cancer	Hepatocellular carcinoma tissue
SRR1274015	SRS603642	GSM1381498	Cancer tissue from patient with chronic hepatitis C associated cancer	Hepatocellular carcinoma tissue
SRR1274016	SRS603643	GSM1381499	Cancer tissue from patient with chronic hepatitis C associated cancer	Hepatocellular carcinoma tissue
SRR1274017	SRS603644	GSM1381500	Cancer tissue from patient with chronic hepatitis C associated cancer	Hepatocellular carcinoma tissue

## Sheet: dataset-2
Run	SRA sample	Sample name	condition	patient	Sample
SRR2845753	SRS1137896	GSM1920305	lean	1A	spermatozoa
SRR2845754	SRS1137897	GSM1920306	lean	2A	spermatozoa
SRR2845755	SRS1137895	GSM1920307	lean	3A	spermatozoa
SRR2845756	SRS1137894	GSM1920308	lean	4A	spermatozoa
SRR2845757	SRS1137893	GSM1920309	lean	5A	spermatozoa
SRR2845758	SRS1137891	GSM1920310	lean	6A	spermatozoa
SRR2845759	SRS1137892	GSM1920311	lean	7A	spermatozoa
SRR2845760	SRS1137890	GSM1920312	lean	12A	spermatozoa
SRR2845761	SRS1137888	GSM1920313	lean	8A	spermatozoa
SRR2845762	SRS1137886	GSM1920314	lean	9A	spermatozoa
SRR2845763	SRS1137885	GSM1920315	lean	10A	spermatozoa
SRR2845764	SRS1137887	GSM1920316	lean	15A	spermatozoa
SRR2845765	SRS1137884	GSM1920317	lean	16A	spermatozoa
SRR2845766	SRS1137883	GSM1920318	obese	8B	spermatozoa
SRR2845767	SRS1137882	GSM1920319	obese	9B	spermatozoa
SRR2845768	SRS1137879	GSM1920320	obese	1B	spermatozoa
SRR2845769	SRS1137878	GSM1920321	obese	2B	spermatozoa
SRR2845770	SRS1137877	GSM1920322	obese	3B	spermatozoa
SRR2845771	SRS1137876	GSM1920323	obese	4B	spermatozoa
SRR2845772	SRS1137875	GSM1920324	obese	5B	spermatozoa
SRR2845773	SRS1137874	GSM1920325	obese	6B	spermatozoa
SRR2845774	SRS1137873	GSM1920326	obese	11B	spermatozoa
SRR2845775	SRS1137872	GSM1920327	obese	7B	spermatozoa

## Sheet: dataset-3
Run	SRA Sample	Sample Name	Cell type		Developmental stage	Strain	Library layout
ERR1433131	ERS1190984	E-MTAB-4775:s_1cell.PA	1 cell embryo	1 cell embryo		B6D2F1	paired
ERR1433132	ERS1190985	E-MTAB-4775:s_MII.PA	oocyte	oocyte		B6D2F1	paired
ERR2705002	ERS2616499	E-MTAB-47751531923695:s_GV1	oocyte	oocyte GV		B6DF1	paired
